# Supplementary material for: Rye Snow Mold-Associated Microdochium nivale Strains Inhabiting a Common Area: Variability in Genetics, Morphotype, Extracellular Enzymatic Activities, and Virulence
Source: J Fungi (Basel). 2020 Dec 3;6(4):335. doi: 10.3390/jof6040335 (PMC7761817; doi:10.3390/jof6040335)
Supplement: Supplementary file 1 [file jof-06-00335-s001.zip]

Archive with 7 entries (7 files):
- Figure S1.pdf
- Table S1-S10.xls
- Table S11.doc
- Table S12.doc
- Table S13.doc
- Table S14_S19.xls
- Table S20-21.xls
