# Supplementary material for: Rye Snow Mold-Associated Microdochium nivale Strains Inhabiting a Common Area: Variability in Genetics, Morphotype, Extracellular Enzymatic Activities, and Virulence
Source: J Fungi (Basel). 2020 Dec 3;6(4):335. doi: 10.3390/jof6040335 (PMC7761817; doi:10.3390/jof6040335)
Supplement: Supplementary file 1 [file jof-06-00335-s001.zip › Table S1-S10.xls]

## Sheet: Table S1
Table S1: Number of reads corresponding to ITS2 region of fungal rRNA locus in the analyzed samples of snow mold damaged winter rye plants
Sample	Sample type	Description	Number of reads
S105	GL	Green parts of leaves	189658
S106	GL	Green parts of leaves	191012
S109	GL	Green parts of leaves	177654
S111	GL	Green parts of leaves	183953
S112	GL	Green parts of leaves	177096
S113	GL	Green parts of leaves	4312
S114	GL	Green parts of leaves	158479
S115	GL	Green parts of leaves	184325
S116	GL	Green parts of leaves	141112
S202	DL	Desiccated dead parts of leaves	166500
S205	DL	Desiccated dead parts of leaves	143342
S206	DL	Desiccated dead parts of leaves	149955
S207	DL	Desiccated dead parts of leaves	144652
S209	DL	Desiccated dead parts of leaves	143142
S212	DL	Desiccated dead parts of leaves	140919
S213	DL	Desiccated dead parts of leaves	164426
S214	DL	Desiccated dead parts of leaves	147906
S215	DL	Desiccated dead parts of leaves	137439
S216	DL	Desiccated dead parts of leaves	152296
S301	R	Roots	77251
S302	R	Roots	156523
S306	R	Roots	69109
S307	R	Roots	97399
S308	R	Roots	190193
S313	R	Roots	115626
S314	R	Roots	118189
S315	R	Roots	109249
S316	R	Roots	114092
Total			3945809

## Sheet: Table S2
Table S2: Number of reads corresponding to V4 region of the bacterial 16S rRNA gene in the analyzed samples of snow mold damaged winter rye plants
Sample	Sample type	Description	Number of reads
S106	GL	Green parts of leaves	71357
S109	GL	Green parts of leaves	81182
S111	GL	Green parts of leaves	82460
S112	GL	Green parts of leaves	83516
S114	GL	Green parts of leaves	94497
S115	GL	Green parts of leaves	86855
S116	GL	Green parts of leaves	60688
S202	DL	Desiccated dead parts of leaves	105043
S204	DL	Desiccated dead parts of leaves	89148
S205	DL	Desiccated dead parts of leaves	104992
S206	DL	Desiccated dead parts of leaves	89054
S207	DL	Desiccated dead parts of leaves	99542
S211	DL	Desiccated dead parts of leaves	87460
S212	DL	Desiccated dead parts of leaves	90029
S214	DL	Desiccated dead parts of leaves	98952
S216	DL	Desiccated dead parts of leaves	89676
S301	R	Roots	91221
S302	R	Roots	103229
S304	R	Roots	110262
S305	R	Roots	100753
S306	R	Roots	122290
S307	R	Roots	103008
S308	R	Roots	96542
S310	R	Roots	140284
S311	R	Roots	162205
S313	R	Roots	89272
S314	R	Roots	104910
S315	R	Roots	105443
S316	R	Roots	95186
Total			2839056

## Sheet: Table S3
Table S3: Absolute abundance (number of reads corresponding to ITS2 region of fungal rRNA locus) of fungal OTUs in the samples of winter rye plants
Samples of green leaves (S105, S106, S109, S111, S112, S113, S114, S115, S116)
Samples of desiccated leaves (S202, S205, S206, S207, S209, S212, S213, S214, S215, S216)
Samples of roots (S301, S302, S306, S307, S308, S313, S314, S315, S316)
OTU ID	S105	S106	S109	S111	S112	S113	S114	S115	S116	S202	S205	S206	S207	S209	S212	S213	S214	S215	S216	S301	S302	S306	S307	S308	S313	S314	S315	S316	Kingdom	Phylum	Class	Order	Family	Genus	Species
OTU2	49386	58883	30351	49033	70155	3461	125781	62236	98562	58	510	481	1941	1796	608	1457	550	890	135	4830	464	1127	1228	39086	276	3542	860	1168	Fungi	Ascomycota	Dothideomycetes	Capnodiales	Mycosphaerellaceae	Mycosphaerella	tassiana
OTU4	66986	44305	5617	152	119	6	193	22	9512	2168	81	5972	10	1	4	13	6	0	29	10982	24981	9183	5403	7014	1276	3563	88	790	Fungi	Ascomycota	Sordariomycetes	Xylariales	Microdochiaceae	Microdochium	NA
OTU6	0	0	22452	36053	18355	190	12202	31441	12667	0	0	0	0	31	7	0	9	0	4	50	0	17	0	0	484	6861	1563	423	Fungi	Ascomycota	Leotiomycetes	Helotiales	Sclerotiniaceae	NA	NA
OTU7	26	472	808	6860	449	7	13	494	150	0	46	0	10	4	3	9	0	0	0	12207	21966	7634	13722	24366	38495	16458	52909	14269	Fungi	Ascomycota	Leotiomycetes	Thelebolales	Pseudeurotiaceae	Pseudogymnoascus	NA
OTU8	61610	21337	3653	45	40	13	1185	287	5	707	0	232	0	1	10	0	0	0	0	311	98	2291	19	1157	1069	228	22	14	Fungi	Ascomycota	Sordariomycetes	Xylariales	Microdochiaceae	Microdochium	NA
OTU10	0	1	0	0	0	0	0	5	0	0	0	0	0	0	0	2	0	0	0	1862	8552	2451	8133	28440	3244	2833	2316	8103	Fungi	Ascomycota	Leotiomycetes	Helotiales	NA	NA	NA
OTU12	1323	7542	3772	5744	7458	56	1868	7335	1184	14	84	26	88	113	81	25	37	41	5	65	120	13	88	781	137	358	218	81	Fungi	Basidiomycota	Tremellomycetes	Tremellales	Bulleribasidiaceae	Vishniacozyma	tephrensis
OTU13	1	42	33	144	550	0	4	104	161	0	0	0	0	14	0	0	0	0	0	191	2799	1012	1203	1601	5722	3117	13874	2392	Fungi	Ascomycota	Leotiomycetes	Helotiales	Helotiales_fam_Incertae_sedis	Leohumicola	NA
OTU15	594	126	3620	2972	13435	15	700	4130	5032	2	21	3	569	161	462	120	165	24	115	0	408	139	2654	2937	409	3447	250	3128	Fungi	Ascomycota	Sordariomycetes	Hypocreales	Nectriaceae	Lasionectria	oenanthicola
OTU17	1398	1084	2623	4617	6819	50	668	4632	545	7	13	233	89	2	18	11	0	63	25	168	585	161	748	993	46	251	132	357	Fungi	Ascomycota	Sordariomycetes	Hypocreales	Tilachlidiaceae	Psychronectria	NA
OTU18	168	2158	14	0	3	0	4	2	0	6	101	5	376	0	2	0	0	0	0	275	2651	1206	4283	14766	841	718	686	268	Fungi	Ascomycota	Eurotiomycetes	Eurotiales	Aspergillaceae	Penicillium	aurantiogriseum
OTU19	0	0	0	7	14	0	2	0	0	0	0	0	0	0	0	0	0	0	0	0	215	0	55	0	0	262	0	19456	Fungi	Ascomycota	Sordariomycetes	Hypocreales	Nectriaceae	Gibberella	NA
OTU20	681	5070	2939	4501	4552	57	1006	4780	836	4	28	19	28	61	7	20	41	17	0	15	104	18	56	306	48	217	108	29	Fungi	Basidiomycota	Tremellomycetes	Tremellales	Bulleribasidiaceae	Vishniacozyma	victoriae
OTU21	254	7742	1757	2046	4531	9	216	3106	579	29	3	0	37	33	0	30	28	4	0	0	59	0	25	281	44	170	47	2	Fungi	Basidiomycota	Tremellomycetes	Tremellales	NA	NA	NA
OTU22	0	1	1	0	0	0	0	3	0	0	0	0	0	0	0	0	0	0	0	409	10401	0	556	3935	0	46	0	0	Fungi	Ascomycota	Leotiomycetes	Helotiales	Helotiales_fam_Incertae_sedis	Chalara	pseudoaffinis
OTU24	0	13965	102	0	0	6	4	162	199	0	0	0	0	0	45	0	0	0	5	0	0	0	0	1	0	5	0	0	Fungi	Ascomycota	Dothideomycetes	Pleosporales	Didymellaceae	Neoascochyta	exitialis
OTU25	4	57	4440	4863	2390	1	7	4341	7	0	21	0	0	141	2	53	44	0	0	0	0	0	0	0	0	90	23	0	Fungi	Basidiomycota	Microbotryomycetes	Kriegeriales	Kriegeriaceae	Phenoliferia	psychrophila
OTU28	3	18	6	20	42	3	9	44	2	0	2	0	0	0	0	0	0	0	0	863	2913	1371	3145	743	277	764	437	539	Fungi	Ascomycota	Leotiomycetes	Helotiales	Helotiaceae	Tetracladium	NA
OTU29	193	3307	1028	1186	1407	14	850	2082	195	0	37	2	0	5	0	8	0	0	0	0	237	0	11	97	0	104	61	11	Fungi	Basidiomycota	Tremellomycetes	Tremellales	Bulleribasidiaceae	Vishniacozyma	victoriae
OTU30	8	0	94	447	453	1	12	450	290	0	0	0	0	0	0	0	0	0	0	692	171	28	119	1074	1073	1340	2588	413	Fungi	Ascomycota	Dothideomycetes	Pleosporales	Leptosphaeriaceae	Leptosphaeria	sclerotioides
OTU32	70	6933	1190	1348	2025	9	100	1804	118	0	0	9	0	3	0	8	19	0	9	13	30	32	0	68	0	68	28	9	Fungi	Basidiomycota	Tremellomycetes	Tremellales	Bulleribasidiaceae	Dioszegia	hungarica
OTU34	3	327	1905	2735	1455	1	4	1797	15	7	38	31	15	189	30	52	115	17	118	0	0	0	12	0	0	41	0	0	Fungi	Basidiomycota	Microbotryomycetes	Kriegeriales	Kriegeriaceae	Phenoliferia	psychrophenolica
OTU36	0	0	0	0	0	0	0	0	0	0	0	0	0	0	0	1	0	0	0	0	34	0	0	0	4880	32	109	1358	Fungi	Ascomycota	Leotiomycetes	Helotiales	Hyaloscyphaceae	Lachnum	NA
OTU37	48	279	45	236	49	0	0	63	24	0	939	13	0	0	0	0	0	0	0	410	687	1206	376	400	205	139	1005	119	Fungi	Ascomycota	Sordariomycetes	Hypocreales	Nectriaceae	Nectria	ramulariae
OTU38	0	2	0	0	2	0	0	1	0	0	0	0	0	0	0	0	0	0	0	2346	3528	813	30	1437	0	8	287	44	Fungi	Ascomycota	Leotiomycetes	Helotiales	Helotiaceae	NA	NA
OTU39	1	2	102	835	357	2	25	317	54	0	12	0	0	40	9	10	4	0	0	0	356	143	631	236	1284	987	630	580	Fungi	Ascomycota	Dothideomycetes	Pleosporales	Phaeosphaeriaceae	NA	NA
OTU41	0	0	253	1298	851	1	42	573	276	0	0	0	0	343	0	144	0	0	0	0	0	0	1976	0	73	45	1585	534	Fungi	Ascomycota	Leotiomycetes	Helotiales	Dermateaceae	Oculimacula	yallundae
OTU42	0	15	0	6	3	0	0	66	6	0	0	0	0	0	0	0	17	0	0	400	3533	154	303	474	158	132	241	839	Fungi	Ascomycota	Dothideomycetes	Pleosporales	Melanommataceae	NA	NA
OTU43	0	3	0	14	2	1	0	26	0	0	0	0	0	0	0	0	0	0	0	1766	280	303	1011	1446	121	32	150	131	Fungi	Ascomycota	Leotiomycetes	Helotiales	Helotiales_fam_Incertae_sedis	Cadophora	NA
OTU45	0	0	19	0	1	1	0	1	0	0	0	0	0	0	0	0	0	0	0	0	53	1241	73	326	514	1090	2782	1011	Fungi	Ascomycota	Leotiomycetes	Helotiales	Hyaloscyphaceae	Cistella	NA
OTU46	0	0	0	0	3	0	0	0	0	0	0	0	0	0	0	0	0	0	0	0	24	285	90	4542	0	0	0	0	Fungi	Ascomycota	Leotiomycetes	Helotiales	Helotiaceae	Bisporella	NA
OTU48	0	0	111	442	1953	11	29	537	87	0	0	0	0	10	0	5	0	8	0	0	0	0	0	0	1039	663	437	2377	Fungi	Ascomycota	Leotiomycetes	Helotiales	Dermateaceae	Helgardia	anguioides
OTU49	0	2	72	153	195	10	365	124	107	0	5	0	0	37	26	0	14	0	0	0	0	0	0	0	950	1889	721	103	Fungi	Ascomycota	Dothideomycetes	Pleosporales	Lentitheciaceae	Pleurophoma	NA
OTU50	2	4	1	2	2	0	0	0	0	0	0	0	0	0	0	0	0	0	0	0	154	9	2594	1081	55	0	582	162	Fungi	Ascomycota	Sordariomycetes	Glomerellales	Plectosphaerellaceae	Gibellulopsis	piscis
OTU51	6	8	6	4	10	0	20	2	14	0	0	6	0	0	0	0	0	0	0	59	161	336	330	2971	221	194	218	137	Fungi	Ascomycota	Eurotiomycetes	Eurotiales	Aspergillaceae	Penicillium	decumbens
OTU52	0	3	2	0	231	0	0	11	0	0	0	0	0	0	0	0	0	0	0	229	250	262	3493	245	0	10	13	24	Fungi	Ascomycota	Leotiomycetes	Helotiales	Helotiaceae	Tetracladium	NA
OTU53	0	0	0	0	0	0	0	0	0	0	0	0	0	0	0	0	0	0	0	0	0	0	3667	0	0	6	0	28	Fungi	Chytridiomycota	Chytridiomycetes	Chytridiales	Chytridiaceae	NA	NA
OTU54	0	0	740	1733	1444	0	293	9	68	0	0	0	0	0	0	0	0	0	0	0	0	0	0	0	1	0	0	0	Fungi	Ascomycota	Dothideomycetes	Pleosporales	Didymellaceae	Neoascochyta	graminicola
OTU55	1	220	4	3	2	0	0	0	0	0	0	0	0	0	0	0	0	0	0	959	516	193	1173	241	0	0	0	0	Fungi	Mucoromycota	Mucoromycetes	Mucorales	Rhizopodaceae	Rhizopus	arrhizus
OTU57	0	1	1	0	8	0	0	3	0	0	0	0	0	0	0	0	0	0	0	766	271	536	253	34	18	98	24	1025	Fungi	Ascomycota	Sordariomycetes	Xylariales	Microdochiaceae	Microdochium	NA
OTU58	0	0	42	13	1157	1	277	517	1461	0	0	0	0	0	0	0	0	7	0	0	0	0	0	0	0	14	1	0	Fungi	Ascomycota	Dothideomycetes	Pleosporales	Didymellaceae	Neoascochyta	europaea
OTU62	0	428	4	80	221	0	104	23	1454	0	0	0	0	0	0	0	0	0	0	0	0	9	0	0	115	57	102	0	Fungi	Ascomycota	Sordariomycetes	Hypocreales	Hypocreales_fam_Incertae_sedis	Sarocladium	summerbellii
OTU64	2	137	186	868	1197	7	22	1386	39	0	0	0	0	3	0	0	0	10	0	0	1083	0	21	12	0	112	11	801	Fungi	Ascomycota	Dothideomycetes	Pleosporales	Phaeosphaeriaceae	Phaeosphaeria	tofieldiae
OTU66	8	14	2	0	2	0	10	0	4	0	0	0	0	0	0	0	0	0	0	49	307	160	422	1588	0	11	0	13	Fungi	Ascomycota	Eurotiomycetes	Eurotiales	Aspergillaceae	Penicillium	NA
OTU69	1	4	9	17	16	1	4	13	2	0	0	0	0	0	0	0	0	0	0	0	0	76	131	1041	184	196	486	27	Fungi	Ascomycota	Dothideomycetes	Venturiales	Sympoventuriaceae	Ochroconis	NA
OTU70	0	0	0	0	0	0	0	0	0	0	0	0	0	0	0	0	0	0	1	0	0	28	264	2005	0	0	0	46	Fungi	Ascomycota	Leotiomycetes	Helotiales	Myxotrichaceae	NA	NA
OTU72	0	0	0	0	0	0	0	1	0	0	0	0	0	0	0	0	0	0	0	309	169	531	50	265	853	350	362	42	Fungi	Ascomycota	Dothideomycetes	Pleosporales	Melanommataceae	NA	NA
OTU73	131	267	1465	0	1	0	53	10	2	0	0	0	0	0	0	0	0	0	0	0	7	0	85	0	0	50	0	0	Fungi	Basidiomycota	Tremellomycetes	Tremellales	Bulleribasidiaceae	Dioszegia	changbaiensis
OTU75	0	0	1	0	0	0	0	0	0	0	0	0	0	0	0	0	0	0	0	141	52	129	241	323	266	179	246	329	Fungi	Ascomycota	Dothideomycetes	Pleosporales	Phaeosphaeriaceae	Ophiosphaerella	NA
OTU77	0	6	8	17	114	0	0	6	0	0	0	0	0	0	0	0	0	0	0	63	0	8	96	126	152	984	0	228	Fungi	Ascomycota	Sordariomycetes	Hypocreales	Hypocreales_fam_Incertae_sedis	Sarocladium	bactrocephalum
OTU80	0	0	0	0	0	0	0	0	0	0	0	0	0	0	0	0	0	0	0	0	0	0	0	0	198	150	1180	138	Fungi	Basidiomycota	Microbotryomycetes	Leucosporidiales	Leucosporidiaceae	Leucosporidium	intermedium
OTU84	0	0	3	86	155	1	7	255	4	0	0	0	0	0	0	0	0	0	0	0	0	5	0	0	834	22	100	47	Fungi	Ascomycota	Dothideomycetes	Pleosporales	Phaeosphaeriaceae	Septoriella	hirta
OTU85	0	0	3	11	0	0	4	0	7	0	0	0	0	0	0	0	1	0	0	7	243	331	426	0	262	161	155	92	Fungi	Ascomycota	Sordariomycetes	Sordariales	Lasiosphaeriaceae	Apodus	deciduus
OTU86	0	6	11	454	686	1	83	214	34	0	0	0	0	0	8	4	0	0	0	0	16	0	22	0	0	14	28	267	Fungi	Ascomycota	Leotiomycetes	Helotiales	Hyaloscyphaceae	Cistella	grevillei
OTU87	0	0	7	17	4	0	10	5	4	0	0	0	11	0	0	0	0	0	0	284	0	191	99	181	468	46	9	86	Fungi	Ascomycota	Sordariomycetes	Hypocreales	Nectriaceae	Gibberella	intricans
OTU91	0	0	9	10	4	0	0	1	0	0	0	0	0	0	0	5	0	0	0	0	0	65	129	1326	0	4	130	505	Fungi	Ascomycota	Sordariomycetes	Hypocreales	Nectriaceae	Gibberella	NA
OTU92	0	24	46	39	517	0	3	191	42	0	0	0	0	0	7	26	12	0	0	0	87	93	139	0	0	173	56	6	Fungi	Ascomycota	Sordariomycetes	Hypocreales	NA	NA	NA
OTU98	0	533	86	403	188	1	22	74	71	0	0	0	0	0	0	0	0	0	0	0	0	0	93	10	0	10	0	0	Fungi	Ascomycota	Sordariomycetes	Hypocreales	Hypocreales_fam_Incertae_sedis	NA	NA
OTU99	33	126	244	244	221	0	29	260	29	22	0	0	15	0	0	10	0	3	0	0	0	0	0	0	0	0	0	0	Fungi	Basidiomycota	Tremellomycetes	Tremellales	Bulleribasidiaceae	Vishniacozyma	globispora
OTU100	0	0	7	15	1	0	5	25	2	0	0	0	0	0	0	0	0	0	0	0	28	0	0	1190	0	0	0	28	Fungi	Ascomycota	Sordariomycetes	Sordariales	Lasiosphaeriaceae	Podospora	multipilosa
OTU102	0	0	0	0	0	0	0	0	0	0	0	0	0	0	0	0	0	0	0	308	874	269	219	49	172	0	0	0	Fungi	Ascomycota	Leotiomycetes	Phacidiales	Phacidiaceae	Gremmenia	infestans
OTU103	0	0	0	0	0	0	0	0	0	0	0	0	0	0	0	0	0	0	0	152	267	315	74	197	83	6	64	0	Fungi	Ascomycota	Dothideomycetes	Pleosporales	Lindgomycetaceae	Clohesyomyces	aquaticus
OTU108	0	0	1	0	0	0	0	2	1	0	0	0	0	0	0	0	0	0	0	0	48	0	9	0	1048	5	313	0	Fungi	Ascomycota	Leotiomycetes	Helotiales	NA	NA	NA
OTU109	0	20	1	0	0	0	0	0	0	0	0	0	0	0	0	0	0	0	0	0	75	517	155	351	0	0	0	0	Fungi	Ascomycota	Dothideomycetes	Pleosporales	Phaeosphaeriaceae	Paraphoma	chrysanthemicola
OTU110	0	0	0	1	0	0	0	0	0	0	0	0	0	0	0	0	0	0	0	0	51	24	132	1436	475	238	35	39	Fungi	Ascomycota	Sordariomycetes	Sordariales	Chaetomiaceae	Chaetomium	angustispirale
OTU111	2	1	4	2	5	1	16	3	11	0	0	0	0	0	2	0	0	0	0	65	8	60	0	771	40	5	75	58	Fungi	Ascomycota	Eurotiomycetes	Onygenales	NA	NA	NA
OTU112	0	0	0	0	0	0	0	0	0	0	0	0	0	0	0	0	0	0	0	0	0	0	0	1152	0	0	0	0	Fungi	Ascomycota	Dothideomycetes	Pleosporales	Thyridariaceae	Roussoella	NA
OTU115	0	0	0	0	0	0	0	0	0	0	0	0	0	0	0	0	0	0	0	1031	0	0	0	0	0	0	0	0	Fungi	Ascomycota	Dothideomycetes	Dothideales	Dothioraceae	Dothiora	NA
OTU116	0	162	23	17	22	0	0	77	0	48	110	0	0	0	0	0	0	0	0	11	193	10	169	0	0	121	13	0	Fungi	Mortierellomycota	Mortierellomycetes	Mortierellales	Mortierellaceae	Mortierella	hyalina
OTU122	0	0	0	0	1	1	0	0	0	0	0	0	0	0	0	0	0	0	0	62	66	50	75	292	82	17	0	389	Fungi	Ascomycota	Leotiomycetes	Helotiales	Helotiaceae	Crocicreas	NA
OTU123	0	0	0	0	0	0	0	0	0	0	0	0	0	0	0	0	0	0	0	68	14	11	8	19	0	0	0	755	Fungi	Basidiomycota	Agaricomycetes	Agaricales	NA	NA	NA
OTU124	0	0	0	0	0	0	0	0	0	0	0	0	0	0	0	0	0	0	0	0	0	0	0	906	0	0	0	0	Fungi	Ascomycota	Dothideomycetes	Pleosporales	Didymosphaeriaceae	Paraphaeosphaeria	NA
OTU135	2	0	0	0	0	0	1	0	0	0	0	0	0	0	0	0	0	0	0	0	0	13	135	426	82	60	96	0	Fungi	Ascomycota	Eurotiomycetes	Eurotiales	Aspergillaceae	Aspergillus	NA
OTU138	0	0	0	0	8	0	1	3	0	0	0	0	0	0	0	0	0	0	0	0	0	0	0	1	715	3	0	1	Fungi	Ascomycota	Leotiomycetes	Helotiales	NA	NA	NA
OTU140	0	0	0	0	0	0	0	0	0	0	0	0	0	0	0	0	0	0	0	102	0	172	104	252	0	0	0	32	Fungi	Ascomycota	Leotiomycetes	Helotiales	Myxotrichaceae	NA	NA
OTU141	0	178	18	105	83	0	7	50	8	0	0	0	56	0	0	0	0	0	0	0	0	0	0	169	4	12	0	0	Fungi	Ascomycota	Dothideomycetes	Pleosporales	Pleosporaceae	Alternaria	alternata
OTU144	0	7	3	0	39	0	3	3	188	0	0	0	0	0	0	0	0	0	0	0	0	287	0	0	0	98	0	0	Fungi	Ascomycota	Leotiomycetes	Helotiales	Helotiaceae	Crocicreas	NA
OTU146	0	0	0	4	25	0	244	5	0	0	0	0	0	0	0	0	0	0	0	355	0	109	0	0	6	9	0	2	Fungi	Ascomycota	Sordariomycetes	Hypocreales	Nectriaceae	Gibberella	tricincta
OTU148	0	0	0	3	0	0	0	0	0	0	0	0	0	0	0	0	0	0	0	134	0	45	0	0	0	0	409	9	Fungi	Ascomycota	Sordariomycetes	Coniochaetales	Coniochaetaceae	NA	NA
OTU149	0	0	11	0	0	0	0	6	0	0	0	0	0	0	0	0	0	0	0	30	14	9	58	9	378	100	481	114	Fungi	Basidiomycota	Agaricomycetes	Atheliales	Atheliaceae	Athelia	NA
OTU150	0	0	0	0	0	0	0	0	0	0	0	0	0	0	0	0	0	0	0	591	0	0	33	0	0	0	0	0	Fungi	Ascomycota	Leotiomycetes	Helotiales	Sclerotiniaceae	NA	NA
OTU152	0	2	2	2	0	0	0	0	0	0	0	0	0	0	0	0	0	0	0	0	83	87	468	366	6	0	1	30	Fungi	Ascomycota	Sordariomycetes	Hypocreales	Hypocreaceae	Monocillium	mucidum
OTU155	0	0	0	0	0	0	0	0	0	0	11	0	0	0	0	0	0	0	0	39	93	204	65	50	63	0	106	0	Fungi	Ascomycota	Sordariomycetes	Hypocreales	Nectriaceae	Volutella	NA
OTU157	0	8	9	786	26	2	2	32	0	0	0	0	0	0	0	0	0	0	0	0	261	8	0	0	0	0	0	0	Fungi	Ascomycota	Dothideomycetes	Pleosporales	Phaeosphaeriaceae	NA	NA
OTU158	0	0	0	388	102	0	0	1	0	0	0	0	0	0	0	0	0	136	0	0	0	0	0	0	0	0	1	4	Fungi	Ascomycota	Leotiomycetes	Helotiales	Hyaloscyphaceae	Cistella	NA
OTU161	0	8	223	83	210	0	1	37	2	0	13	0	0	0	0	0	0	5	0	0	0	0	0	0	0	0	0	0	Fungi	Basidiomycota	Tremellomycetes	Holtermanniales	Holtermanniales_fam_Incertae_sedis	Holtermanniella	takashimae
OTU162	0	0	0	0	0	0	0	0	0	0	0	0	0	0	0	0	0	0	0	0	0	0	17	0	232	142	0	180	Fungi	Chytridiomycota	Chytridiomycetes	Chytridiales	Chytridiaceae	NA	NA
OTU163	1	4	0	0	0	0	0	0	0	0	0	0	0	0	0	0	0	0	0	129	73	207	121	28	0	0	39	0	Fungi	Ascomycota	Dothideomycetes	Pleosporales	Phaeosphaeriaceae	Paraphoma	radicina
OTU167	0	0	0	0	0	0	0	0	0	0	0	0	0	0	0	0	0	0	0	516	0	0	0	0	64	0	0	0	Fungi	Ascomycota	Leotiomycetes	Helotiales	NA	NA	NA
OTU171	0	0	2	1	7	1	5	0	3	0	0	0	0	0	0	0	0	0	0	20	32	104	0	272	354	53	59	62	Fungi	Ascomycota	Sordariomycetes	Sordariales	Lasiosphaeriaceae	NA	NA
OTU172	0	21	0	0	2	0	0	7	0	0	0	4	0	0	0	0	0	0	0	0	0	0	5	0	131	67	155	125	Fungi	Ascomycota	Sordariomycetes	Phomatosporales	Phomatosporaceae	Phomatospora	striatigera
OTU174	3	52	45	310	83	8	11	168	145	0	0	0	0	0	0	0	0	0	0	35	30	0	15	0	52	1	4	0	Fungi	Ascomycota	Dothideomycetes	Pleosporales	Phaeosphaeriaceae	Vagicola	chlamydospora
OTU176	0	5	67	129	126	0	0	146	0	0	0	0	0	5	0	0	0	0	0	0	0	0	0	0	0	9	0	0	Fungi	Basidiomycota	Tremellomycetes	Filobasidiales	Filobasidiaceae	Filobasidium	stepposum
OTU177	0	17	19	90	112	0	0	243	1	0	0	0	0	0	0	0	0	0	0	0	0	0	0	0	0	5	0	0	Fungi	Basidiomycota	Tremellomycetes	Cystofilobasidiales	Mrakiaceae	Itersonilia	pannonica
OTU178	0	7	88	189	73	0	3	84	1	0	0	0	0	0	0	0	0	0	0	0	0	0	0	0	0	26	0	0	Fungi	Basidiomycota	Tremellomycetes	Tremellales	Tremellaceae	Bulleromyces	albus
OTU181	3	8	1	2	2	0	0	0	0	0	0	5	0	0	0	0	0	0	10	158	46	0	125	1	14	48	0	22	Fungi	Ascomycota	Sordariomycetes	Hypocreales	Nectriaceae	Fusarium	oxysporum
OTU182	0	0	0	0	0	0	0	0	0	0	0	0	0	0	0	0	0	0	0	0	0	0	0	441	0	0	0	0	Fungi	Ascomycota	Eurotiomycetes	Eurotiales	Aspergillaceae	Penicillium	NA
OTU184	0	84	54	43	80	0	1	92	5	13	27	1	0	2	0	10	11	0	13	0	25	0	16	0	0	0	0	0	Fungi	Basidiomycota	Microbotryomycetes	Kriegeriales	Kriegeriaceae	Phenoliferia	psychrophila
OTU185	0	0	2	0	1	0	0	0	0	0	0	0	0	0	0	0	0	0	0	0	0	424	0	0	0	15	0	0	Fungi	Ascomycota	Dothideomycetes	Pleosporales	Cucurbitariaceae	Pyrenochaeta	NA
OTU187	0	1	0	0	0	0	1	0	0	0	0	0	0	0	0	0	0	0	0	0	56	83	39	223	27	8	0	0	Fungi	Ascomycota	Sordariomycetes	Hypocreales	Hypocreales_fam_Incertae_sedis	Acremonium	furcatum
OTU189	1	0	2	0	1	0	0	2	0	0	0	0	0	0	0	0	0	0	0	0	423	0	0	0	0	0	0	0	Fungi	Ascomycota	Leotiomycetes	Helotiales	Helotiaceae	Tetracladium	NA
OTU191	0	0	0	0	0	0	0	0	0	0	0	0	0	0	0	0	0	0	0	0	0	0	0	0	0	334	7	72	Fungi	Ascomycota	Leotiomycetes	Helotiales	Helotiaceae	Hymenoscyphus	menthae
OTU193	0	0	20	12	26	1	4	7	113	0	0	0	0	0	0	0	0	0	0	0	0	278	13	89	31	34	110	41	Fungi	Ascomycota	Leotiomycetes	Helotiales	Helotiaceae	Crocicreas	NA
OTU194	1	0	0	0	0	0	0	0	0	0	0	0	0	0	0	0	0	0	0	0	49	186	0	0	3	141	21	0	Fungi	Mortierellomycota	Mortierellomycetes	Mortierellales	Mortierellaceae	Mortierella	elongata
OTU195	0	0	0	3	0	0	2	0	9	0	0	0	0	0	0	0	0	0	0	0	0	0	0	20	0	276	12	76	Fungi	Ascomycota	Dothideomycetes	Pleosporales	Cucurbitariaceae	Pyrenochaetopsis	leptospora
OTU197	0	0	0	0	0	0	0	0	0	0	0	0	0	0	0	0	0	0	0	0	0	0	0	434	0	0	10	0	Fungi	Ascomycota	Eurotiomycetes	Eurotiales	Aspergillaceae	Penicillium	NA
OTU198	0	1	270	9	254	0	0	9	0	0	0	0	0	0	0	0	0	0	0	0	0	0	0	0	0	0	0	1	Fungi	Basidiomycota	Tremellomycetes	Cystofilobasidiales	Cystofilobasidiaceae	Cystofilobasidium	macerans
OTU206	0	0	2	0	2	0	1	1	2	0	0	0	0	0	0	0	0	0	0	0	0	20	0	0	162	274	18	114	Fungi	Ascomycota	Sordariomycetes	Sordariales	Lasiosphaeriaceae	Schizothecium	carpinicola
OTU208	0	0	1	7	8	0	0	3	0	0	0	0	48	0	0	0	0	0	0	7	0	6	0	0	50	95	314	161	Fungi	Ascomycota	Leotiomycetes	Helotiales	Helotiaceae	Infundichalara	minuta
OTU213	0	0	0	0	0	0	0	0	0	0	0	0	0	0	0	0	0	0	0	1	16	20	78	105	18	54	33	6	Fungi	Ascomycota	Leotiomycetes	Helotiales	Hyaloscyphaceae	Cistella	NA
OTU219	0	0	0	0	0	0	0	0	0	0	0	0	0	0	0	0	0	0	0	0	0	0	118	315	0	2	15	66	Fungi	Ascomycota	Eurotiomycetes	Onygenales	Onygenales_fam_Incertae_sedis	Chrysosporium	lobatum
OTU220	0	8	9	77	87	0	0	137	1	0	0	0	0	0	0	0	0	0	0	0	21	0	19	0	0	0	0	21	Fungi	Basidiomycota	Microbotryomycetes	Sporidiobolales	Sporidiobolaceae	Sporobolomyces	roseus
OTU221	0	0	0	0	0	0	0	0	0	0	0	0	0	0	0	0	0	0	0	0	282	0	32	0	0	0	0	0	Fungi	Ascomycota	Leotiomycetes	Helotiales	Hyaloscyphaceae	Trichopezizella	NA
OTU222	0	0	1	0	0	0	0	0	0	0	0	0	0	3	0	0	6	3	0	131	166	27	14	4	23	17	43	74	Fungi	Basidiomycota	Malasseziomycetes	Malasseziales	Malasseziaceae	Malassezia	restricta
OTU224	0	0	0	0	0	0	0	0	1	0	0	0	0	0	0	0	0	0	0	0	0	0	0	328	0	0	8	0	Fungi	Ascomycota	Eurotiomycetes	Onygenales	NA	NA	NA
OTU225	0	0	6	24	61	1	0	26	1	0	0	0	0	0	0	0	0	0	0	0	0	0	12	0	0	0	0	196	Fungi	Ascomycota	Dothideomycetes	Pleosporales	NA	NA	NA
OTU226	0	0	0	0	0	0	0	0	0	0	0	0	0	0	0	0	0	0	0	0	0	51	250	0	0	0	0	0	Fungi	Ascomycota	Dothideomycetes	Pleosporales	Cucurbitariaceae	Pyrenochaetopsis	leptospora
OTU228	0	0	14	3	3	0	13	1	3	0	0	0	0	0	0	0	0	0	0	0	0	0	0	0	120	34	58	47	Fungi	Ascomycota	Dothideomycetes	Pleosporales	Dictyosporiaceae	NA	NA
OTU229	0	0	0	0	0	0	0	0	0	0	0	0	0	0	0	0	0	0	0	0	294	0	0	0	0	0	0	0	Fungi	Basidiomycota	Microbotryomycetes	Sporidiobolales	Sporidiobolaceae	Rhodotorula	mucilaginosa
OTU230	0	8	1	0	0	0	0	0	0	0	0	0	0	0	0	0	0	0	0	0	0	125	0	125	0	33	0	0	Fungi	Ascomycota	Sordariomycetes	Hypocreales	Hypocreaceae	Trichoderma	brevicompactum
OTU234	0	0	0	0	1	0	0	0	0	0	0	0	0	0	0	0	0	0	0	14	0	15	14	255	0	0	0	0	Fungi	Ascomycota	Sordariomycetes	Glomerellales	Plectosphaerellaceae	Plectosphaerella	cucumerina
OTU236	0	0	0	0	0	0	0	0	0	0	0	0	0	0	0	0	0	0	0	0	10	38	0	0	0	26	10	198	Fungi	Ascomycota	Leotiomycetes	Helotiales	Helotiaceae	Crocicreas	NA
OTU239	0	0	0	0	0	0	0	3	0	0	0	0	0	0	0	0	0	0	0	0	0	0	0	0	274	0	0	7	Fungi	Ascomycota	Sordariomycetes	Hypocreales	Bionectriaceae	Clonostachys	NA
OTU240	0	3	85	35	81	0	0	50	0	0	0	0	0	9	0	0	11	0	0	0	0	0	0	0	0	0	0	0	Fungi	Basidiomycota	Tremellomycetes	Filobasidiales	Filobasidiaceae	Filobasidium	NA
OTU242	0	0	0	0	0	0	0	0	0	0	0	0	0	0	0	0	0	0	0	0	36	0	201	0	0	25	0	0	Fungi	Ascomycota	Leotiomycetes	Helotiales	Helotiaceae	Allophylaria	subliciformis
OTU244	0	0	0	0	0	0	0	0	0	0	0	0	0	0	0	0	0	0	0	116	23	42	74	6	0	0	0	0	Fungi	Ascomycota	Leotiomycetes	Helotiales	Helotiaceae	Tetracladium	NA
OTU245	0	0	0	0	0	0	0	0	0	0	0	0	0	0	0	0	0	0	0	40	246	47	1	47	0	0	0	8	Fungi	Ascomycota	Leotiomycetes	Helotiales	NA	NA	NA
OTU251	0	0	0	0	0	0	0	0	0	0	0	0	0	0	0	0	0	0	0	0	0	0	0	0	99	0	243	0	Fungi	Ascomycota	Leotiomycetes	Helotiales	NA	NA	NA
OTU252	0	0	0	0	0	0	0	0	241	0	0	0	0	0	0	0	0	0	0	0	0	0	0	0	0	0	0	0	Fungi	Ascomycota	Leotiomycetes	Helotiales	NA	NA	NA
OTU253	0	0	9	3	8	0	0	208	0	0	0	0	0	0	0	0	0	0	0	0	0	0	0	0	0	22	0	0	Fungi	Basidiomycota	Tremellomycetes	Cystofilobasidiales	Cystofilobasidiales_fam_Incertae_sedis	Mrakiella	aquatica
OTU255	0	0	0	0	0	0	0	0	0	0	0	0	0	0	0	0	0	0	0	0	72	169	0	0	0	0	0	0	Fungi	Ascomycota	Sordariomycetes	Hypocreales	NA	NA	NA
OTU256	0	0	0	1	1	0	0	0	0	0	0	0	0	0	0	0	0	0	0	0	0	23	0	179	36	6	0	0	Fungi	Ascomycota	Sordariomycetes	Chaetosphaeriales	Chaetosphaeriaceae	Chloridium	NA
OTU257	0	0	1	0	0	0	0	0	0	0	0	0	0	0	0	0	0	0	0	236	0	0	0	0	0	152	0	15	Fungi	Ascomycota	Sordariomycetes	Xylariales	Xylariaceae	Rosellinia	abscondita
OTU258	0	0	0	1	1	0	0	0	0	0	0	0	0	0	0	0	0	0	0	0	133	0	0	0	32	0	4	61	Fungi	Ascomycota	Dothideomycetes	Pleosporales	NA	NA	NA
OTU259	0	0	1	0	0	0	0	0	0	0	0	0	0	0	0	0	0	0	0	0	0	15	0	0	32	18	17	220	Fungi	Basidiomycota	Agaricostilbomycetes	Agaricostilbales	Chionosphaeraceae	NA	NA
OTU260	0	5	0	1	0	0	1	0	0	0	0	0	0	0	0	0	0	0	0	0	0	49	11	39	10	74	34	0	Fungi	Ascomycota	Dothideomycetes	Pleosporales	Amniculicolaceae	Murispora	galii
OTU261	0	225	4	1	0	0	2	0	0	0	0	0	0	0	0	0	0	0	0	0	0	0	0	0	0	0	0	0	Fungi	Basidiomycota	Tremellomycetes	Cystofilobasidiales	Mrakiaceae	Mrakia	frigida
OTU264	0	0	0	0	0	0	0	0	0	0	0	0	0	0	0	0	0	0	0	0	0	0	0	217	0	0	0	0	Fungi	Ascomycota	Sordariomycetes	NA	NA	NA	NA
OTU265	0	0	0	0	0	0	0	0	0	0	0	0	0	0	0	0	0	0	0	0	150	0	0	0	0	0	0	63	Fungi	Ascomycota	Saccharomycetes	Saccharomycetales	Saccharomycetales_fam_Incertae_sedis	Candida	parapsilosis
OTU266	0	7	8	82	1	0	3	182	0	0	0	0	0	0	0	0	0	0	0	0	0	0	0	0	0	0	0	0	Fungi	Ascomycota	Dothideomycetes	Pleosporales	Leptosphaeriaceae	Leptosphaeria	NA
OTU268	0	0	0	0	0	0	0	0	0	0	0	0	0	4	0	0	0	0	0	209	0	0	0	0	0	0	0	0	Fungi	Basidiomycota	Agaricomycetes	Agaricales	Lycoperdaceae	Lycoperdon	nigrescens
OTU269	5	60	25	41	37	1	11	17	18	0	0	0	0	0	0	0	0	0	0	0	0	0	0	0	0	6	0	0	Fungi	Basidiomycota	Tremellomycetes	Tremellales	Bulleribasidiaceae	Vishniacozyma	dimennae
OTU271	3	0	0	2	0	0	0	0	1	0	0	0	0	0	0	0	0	0	0	0	0	24	10	134	0	31	47	83	Fungi	Ascomycota	Sordariomycetes	Coniochaetales	Coniochaetaceae	Coniochaeta	verticillata
OTU272	0	0	0	40	7	2	2	116	2	0	0	0	0	0	0	0	0	0	0	0	0	0	0	48	0	1	0	0	Fungi	Ascomycota	Dothideomycetes	Pleosporales	Lophiostomataceae	Trichometasphaeria	NA
OTU273	0	0	0	0	2	0	0	0	0	0	0	0	0	0	0	0	0	0	0	0	0	0	0	0	0	0	0	207	Fungi	Ascomycota	Sordariomycetes	Microascales	Microascaceae	Cephalotrichum	stemonitis
OTU274	0	0	0	2	0	0	0	0	0	0	0	0	0	0	0	0	0	0	0	0	0	0	0	0	0	0	0	205	Fungi	Ascomycota	Leotiomycetes	Thelebolales	Pseudeurotiaceae	NA	NA
OTU279	0	5	11	138	21	0	1	9	1	0	1	0	0	0	0	0	0	0	0	0	0	0	0	0	0	0	0	0	Fungi	Ascomycota	Dothideomycetes	Dothideales	Aureobasidiaceae	Aureobasidium	subglaciale
OTU283	0	0	0	0	0	0	0	0	0	0	0	0	0	0	0	0	0	0	0	0	64	17	48	214	0	0	0	0	Fungi	Ascomycota	Leotiomycetes	Thelebolales	Pseudeurotiaceae	NA	NA
OTU284	2	8	26	39	75	0	3	39	3	0	0	0	0	0	0	0	0	0	0	0	0	0	0	0	0	0	0	0	Fungi	Ascomycota	Dothideomycetes	Dothideales	Aureobasidiaceae	Aureobasidium	pullulans
OTU285	0	17	12	4	7	0	10	30	4	0	0	0	0	0	0	0	0	0	0	63	0	0	0	0	0	0	0	23	Fungi	Ascomycota	Dothideomycetes	Pleosporales	Didymellaceae	NA	NA
OTU286	0	1	0	1	1	0	0	1	0	0	0	0	0	0	0	0	0	0	0	0	0	38	0	0	0	0	238	0	Fungi	Ascomycota	Sordariomycetes	Coniochaetales	Coniochaetaceae	Coniochaeta	NA
OTU287	0	0	1	0	1	0	0	1	0	0	0	0	0	0	0	0	0	0	0	0	0	0	0	0	54	55	68	0	Fungi	Basidiomycota	Tremellomycetes	Tremellales	Tremellaceae	Cryptococcus	NA
OTU288	0	1	0	0	0	0	0	0	0	0	0	0	0	0	0	0	0	0	0	0	18	117	13	36	0	0	0	0	Fungi	Ascomycota	Dothideomycetes	Pleosporales	Phaeosphaeriaceae	Paraphoma	chrysanthemicola
OTU289	0	0	0	0	0	0	0	0	0	0	0	0	0	0	0	0	0	0	0	5	19	164	28	3	62	60	17	3	Fungi	Mortierellomycota	Mortierellomycetes	Mortierellales	Mortierellaceae	Mortierella	sarnyensis
OTU293	0	0	0	0	1	0	0	6	0	0	0	0	0	0	0	0	0	0	0	0	8	104	1	0	66	4	0	0	Fungi	Ascomycota	Leotiomycetes	Helotiales	Helotiaceae	Tetracladium	NA
OTU296	0	0	1	0	2	0	0	0	0	0	0	0	0	0	0	0	0	0	0	0	0	32	0	0	84	0	7	51	Fungi	Ascomycota	Sordariomycetes	Hypocreales	Hypocreaceae	Trichoderma	NA
OTU298	0	4	5	8	32	0	0	141	0	0	38	0	0	0	0	0	0	0	0	0	0	0	0	0	0	6	0	0	Fungi	Basidiomycota	Tremellomycetes	Cystofilobasidiales	Mrakiaceae	Mrakia	niccombsii
OTU300	0	0	3	0	0	0	0	0	0	0	0	0	0	0	0	0	0	0	0	0	68	69	0	0	0	0	29	0	Fungi	Ascomycota	Eurotiomycetes	Onygenales	NA	NA	NA
OTU301	0	0	3	3	0	0	0	0	0	0	0	0	0	0	0	0	0	0	0	0	0	0	0	0	116	0	0	45	Fungi	Mucoromycota	Mucoromycetes	Mucorales	Mucoraceae	Mucor	hiemalis
OTU302	0	104	1	0	50	0	7	0	0	0	0	0	0	0	0	0	0	0	0	0	0	0	0	0	0	0	8	0	Fungi	Basidiomycota	Tremellomycetes	Tremellales	Rhynchogastremataceae	Papiliotrema	frias
OTU305	0	0	0	0	271	0	0	0	1	0	0	0	0	0	0	0	0	0	0	0	0	0	0	0	0	8	0	0	Fungi	Ascomycota	Leotiomycetes	Helotiales	Hyaloscyphaceae	Cistella	NA
OTU306	0	0	0	0	0	0	0	0	0	0	0	0	0	0	0	0	0	0	0	0	167	0	0	0	0	0	0	0	Fungi	Ascomycota	Sordariomycetes	Hypocreales	Clavicipitaceae	Claviceps	NA
OTU309	1	0	1	0	0	0	3	6	7	0	0	0	0	0	0	0	0	0	0	0	0	41	28	0	27	11	110	15	Fungi	Ascomycota	Eurotiomycetes	Eurotiales	Trichocomaceae	Talaromyces	sayulitensis
OTU311	0	0	1	1	0	0	0	2	0	0	0	0	0	0	0	0	0	0	0	0	0	0	0	132	0	22	0	0	Fungi	Ascomycota	Eurotiomycetes	Onygenales	Arachnomycetaceae	Arachnomyces	NA
OTU312	0	0	59	30	37	0	0	30	1	0	0	0	0	0	0	0	0	0	0	0	0	0	0	0	0	14	0	0	Fungi	Basidiomycota	Cystobasidiomycetes	Erythrobasidiales	NA	NA	NA
OTU314	0	0	0	0	0	0	0	0	0	0	0	0	0	0	0	0	0	0	0	0	156	0	0	0	0	0	0	0	Fungi	Ascomycota	Sordariomycetes	Hypocreales	Hypocreales_fam_Incertae_sedis	Sarocladium	kiliense
OTU315	0	0	0	0	0	0	0	0	0	0	0	0	0	0	0	0	0	0	0	36	76	44	0	0	0	0	0	0	Fungi	Ascomycota	Leotiomycetes	Helotiales	Helotiaceae	NA	NA
OTU316	3	5	65071	31840	17947	45	5020	26772	835	0	0	0	0	0	15	0	22	0	13	1	0	3	99	21	2086	30044	2626	1034	Fungi	Ascomycota	Leotiomycetes	Helotiales	Helotiaceae	Tetracladium	NA
OTU318	0	0	0	0	0	0	0	0	0	0	0	0	0	0	0	0	0	0	0	0	0	0	0	0	0	155	0	0	Fungi	Ascomycota	Dothideomycetes	Pleosporales	Periconiaceae	Periconia	pseudodigitata
OTU321	0	13	15	55	13	0	0	53	0	0	0	0	0	3	0	0	0	0	0	0	0	0	0	0	0	0	0	0	Fungi	Basidiomycota	Tremellomycetes	Filobasidiales	Filobasidiaceae	Naganishia	albida
OTU322	0	0	0	0	0	0	0	0	0	0	0	0	0	0	0	0	0	0	0	0	1	73	60	0	17	0	2	0	Fungi	Ascomycota	Eurotiomycetes	Onygenales	Onygenales_fam_Incertae_sedis	Chrysosporium	pseudomerdarium
OTU324	0	1	3	3	3	0	0	0	0	0	0	0	0	0	0	0	0	0	0	0	0	28	1	0	126	24	72	25	Fungi	Ascomycota	Eurotiomycetes	Eurotiales	Trichocomaceae	Talaromyces	ucrainicus
OTU326	0	0	7	3	21	0	0	1	0	0	0	0	0	0	0	0	0	0	0	0	0	0	0	0	88	49	10	56	Fungi	Basidiomycota	Agaricostilbomycetes	Agaricostilbales	Chionosphaeraceae	NA	NA
OTU328	0	0	7	60	7	1	3	16	3	0	0	0	0	0	0	0	0	0	0	0	0	0	51	100	0	0	0	24	Fungi	Ascomycota	Dothideomycetes	Pleosporales	Pleosporaceae	Alternaria	metachromatica
OTU329	0	81	3	38	17	0	6	4	1	0	0	0	0	0	0	0	0	0	0	0	0	0	0	0	0	0	0	0	Fungi	Ascomycota	Sordariomycetes	Hypocreales	Stachybotryaceae	Stachybotrys	NA
OTU330	0	0	1	0	2	0	0	0	0	0	0	0	0	0	0	0	0	0	0	0	0	12	25	0	0	86	18	0	Fungi	Mortierellomycota	Mortierellomycetes	Mortierellales	Mortierellaceae	Mortierella	alpina
OTU332	3	20	0	0	4	0	5	4	0	0	0	0	20	0	0	0	0	0	0	0	85	0	0	0	0	0	0	0	Fungi	Ascomycota	Leotiomycetes	Helotiales	Helotiaceae	Infundichalara	minuta
OTU336	0	2	0	0	133	0	0	0	0	0	0	0	0	0	0	0	0	0	0	0	0	0	0	0	0	0	0	0	Fungi	Ascomycota	Leotiomycetes	Helotiales	NA	NA	NA
OTU338	0	0	0	0	0	0	0	0	0	0	0	0	0	0	0	4	0	0	0	23	30	0	29	0	30	8	0	15	Fungi	Basidiomycota	Agaricomycetes	Agaricales	Tricholomataceae	Baeospora	myosura
OTU339	2	0	0	0	12	1	1	0	0	0	18	10	0	0	0	0	0	13	0	14	30	1	25	7	1	11	0	0	Fungi	Basidiomycota	Agaricomycetes	Agaricales	Typhulaceae	Typhula	ishikariensis
OTU340	0	0	2	0	0	0	0	0	0	0	0	0	0	0	0	0	0	0	0	39	0	25	95	15	0	21	8	0	Fungi	Ascomycota	Eurotiomycetes	Eurotiales	Aspergillaceae	Aspergillus	ustus
OTU341	0	0	0	2	0	0	0	0	0	0	0	0	0	0	0	0	0	0	0	0	0	0	135	0	0	0	0	0	Fungi	Ascomycota	Sordariomycetes	Hypocreales	Hypocreales_fam_Incertae_sedis	Emericellopsis	NA
OTU342	0	0	0	0	0	0	0	0	0	0	0	0	0	0	0	0	0	0	0	0	19	50	25	105	0	0	0	0	Fungi	Ascomycota	Sordariomycetes	Sordariales	Lasiosphaeriaceae	NA	NA
OTU343	0	0	4	47	64	0	2	10	0	0	0	0	0	6	0	0	0	0	0	0	0	0	0	0	0	4	0	0	Fungi	Ascomycota	Leotiomycetes	Helotiales	Helotiaceae	Articulospora	proliferata
OTU345	0	0	2	0	4	0	0	2	59	0	0	0	0	0	0	0	0	0	0	0	0	0	0	65	0	4	0	0	Fungi	Ascomycota	Leotiomycetes	Helotiales	Helotiaceae	Crocicreas	NA
OTU346	0	0	1	8	74	0	1	2	0	0	0	0	0	2	0	0	0	0	0	0	0	0	0	0	0	53	0	0	Fungi	Ascomycota	Sordariomycetes	Hypocreales	NA	NA	NA
OTU347	0	2	7	57	17	0	0	16	0	0	0	0	0	0	0	0	0	3	0	0	0	0	0	0	0	14	0	12	Fungi	Basidiomycota	Cystobasidiomycetes	Cystobasidiales	Cystobasidiaceae	Cystobasidium	pinicola
OTU348	0	0	0	0	0	0	0	0	0	0	0	0	0	0	0	0	0	0	0	0	58	1	55	0	0	14	0	0	Fungi	Olpidiomycota	Olpidiomycetes	Olpidiales	Olpidiaceae	Olpidium	brassicae
OTU349	0	0	0	0	0	0	0	0	0	0	0	0	0	0	0	0	0	0	0	0	0	0	0	0	0	0	127	0	Fungi	Ascomycota	Leotiomycetes	Helotiales	Helotiaceae	NA	NA
OTU355	0	0	1	0	3	0	0	0	0	0	0	0	0	0	0	0	0	0	0	0	0	14	0	0	69	33	126	5	Fungi	Chytridiomycota	NA	NA	NA	NA	NA
OTU356	0	0	0	0	0	0	0	0	0	0	0	0	0	0	0	0	0	0	0	0	121	0	0	0	0	0	0	0	Fungi	Basidiomycota	Agaricomycetes	Agaricales	Entolomataceae	Entoloma	sericeum
OTU363	0	0	0	0	0	0	0	0	0	0	0	0	0	0	0	0	0	0	0	0	110	0	5	0	0	0	0	0	Fungi	Ascomycota	NA	NA	NA	NA	NA
OTU364	0	30	57	20	3	0	0	4	0	0	2	0	0	0	0	0	0	0	0	0	0	0	0	0	0	0	0	0	Fungi	Basidiomycota	Tremellomycetes	Holtermanniales	Holtermanniales_fam_Incertae_sedis	Holtermanniella	takashimae
OTU366	0	0	0	0	0	0	0	0	0	0	0	0	0	0	0	0	0	0	0	0	0	11	99	0	0	0	1	0	Fungi	Monoblepharomycota	Sanchytriomycetes	Sanchytriales	Sanchytriaceae	Sanchytrium	NA
OTU368	0	0	0	0	0	0	0	0	0	0	0	0	0	0	0	0	0	0	0	0	0	7	0	105	0	3	0	0	Fungi	Ascomycota	Dothideomycetes	Pleosporales	Leptosphaeriaceae	Plenodomus	biglobosus
OTU369	1	0	2	1	0	0	0	0	0	0	0	0	0	0	0	0	0	0	0	0	16	0	0	0	6	0	54	31	Fungi	Ascomycota	Leotiomycetes	Helotiales	Myxotrichaceae	Oidiodendron	cereale
OTU372	0	0	0	0	0	0	0	0	0	0	0	0	0	0	0	0	0	0	0	0	0	0	0	0	0	0	110	0	Fungi	Basidiomycota	Agaricomycetes	Agaricales	Strophariaceae	Pholiota	squarrosa
OTU375	0	1	0	0	0	0	0	0	0	0	0	0	0	0	0	0	0	0	0	0	15	2	22	27	0	0	0	58	Fungi	Ascomycota	Eurotiomycetes	Chaetothyriales	Herpotrichiellaceae	Exophiala	equina
OTU377	0	0	0	0	1	0	0	0	0	0	0	0	0	0	0	0	0	0	0	0	0	79	0	28	0	0	0	0	Fungi	Ascomycota	Sordariomycetes	Hypocreales	Clavicipitaceae	Metarhizium	anisopliae
OTU382	0	0	0	0	0	0	0	0	0	0	0	0	0	0	0	0	0	0	0	0	35	18	20	0	0	8	20	0	Fungi	Basidiomycota	Atractiellomycetes	Atractiellales	Hoehnelomycetaceae	Atractiella	solani
OTU385	0	0	33	12	12	0	0	22	0	0	0	0	0	0	0	0	0	0	0	35	0	0	0	0	0	0	0	0	Fungi	Basidiomycota	Microbotryomycetes	Leucosporidiales	Leucosporidiaceae	Leucosporidium	golubevii
OTU390	0	0	1	0	0	0	0	2	0	0	0	0	0	0	0	0	0	0	0	0	0	67	0	0	26	3	0	0	Fungi	Ascomycota	Sordariomycetes	Hypocreales	Stachybotryaceae	Myrothecium	NA
OTU394	0	0	0	0	0	0	0	0	0	0	0	0	0	0	0	0	0	0	0	0	0	18	0	0	0	0	0	110	Fungi	Ascomycota	Sordariomycetes	Hypocreales	Clavicipitaceae	Metarhizium	marquandii
OTU396	0	0	1	13	6	1	41	9	0	0	0	0	0	0	0	0	0	0	0	0	0	0	0	0	22	7	0	0	Fungi	Ascomycota	NA	NA	NA	NA	NA
OTU397	0	0	0	0	0	0	0	0	0	0	0	0	0	0	0	0	0	0	0	0	0	0	41	0	0	12	44	0	Fungi	Basidiomycota	Agaricomycetes	NA	NA	NA	NA
OTU400	0	0	0	0	0	0	0	0	0	0	0	0	0	0	0	0	0	0	0	0	0	89	0	12	0	20	0	5	Fungi	Ascomycota	Sordariomycetes	Sordariales	Lasiosphaeriaceae	NA	NA
OTU401	1	17	0	0	5	0	11	0	57	0	0	0	0	0	0	0	0	0	0	0	0	0	0	0	0	0	0	0	Fungi	Ascomycota	Leotiomycetes	Helotiales	Helotiaceae	Tetracladium	NA
OTU402	0	0	0	0	0	0	0	0	0	0	0	0	0	0	0	0	0	0	0	0	0	0	0	0	0	0	7	87	Fungi	Ascomycota	Sordariomycetes	Microascales	Halosphaeriaceae	NA	NA
OTU404	0	0	0	0	0	0	0	0	0	0	0	0	0	0	0	0	0	0	0	93	0	0	0	0	0	3	0	0	Fungi	Chytridiomycota	Chytridiomycetes	Chytridiales	Chytridiaceae	NA	NA
OTU407	0	0	0	0	0	0	0	0	0	0	0	0	0	0	0	0	0	0	0	47	15	0	43	0	0	0	0	0	Fungi	Ascomycota	NA	NA	NA	NA	NA
OTU408	0	0	0	0	0	0	0	0	0	0	0	0	0	0	0	0	0	0	0	0	0	0	0	0	0	18	0	75	Fungi	Ascomycota	Sordariomycetes	Magnaporthales	Magnaporthaceae	Gaeumannomyces	hyphopodioides
OTU412	3	5	0	0	0	0	0	0	0	0	0	0	0	0	0	0	0	0	0	80	0	0	0	0	0	0	0	0	Fungi	Ascomycota	Dothideomycetes	Pleosporales	Melanommataceae	NA	NA
OTU414	1	10	13	13	71	0	11	23	3	0	0	0	0	0	0	0	0	0	0	0	0	0	0	0	0	10	0	0	Fungi	Basidiomycota	Tremellomycetes	Tremellales	Bulleribasidiaceae	Vishniacozyma	heimaeyensis
OTU417	0	3	2	0	0	0	0	0	0	0	0	0	0	0	0	0	0	0	0	0	0	0	23	0	9	0	67	2	Fungi	Ascomycota	Sordariomycetes	Hypocreales	Hypocreaceae	Monocillium	griseo-ochraceum
OTU421	0	9	13	47	15	0	2	29	15	0	0	0	0	0	0	0	0	0	0	0	0	0	0	0	0	0	0	0	Fungi	Basidiomycota	Tremellomycetes	Tremellales	Bulleribasidiaceae	Vishniacozyma	dimennae
OTU422	1	41	3	7	24	0	2	8	0	0	0	0	0	0	0	0	0	0	0	0	0	85	0	0	0	0	0	0	Fungi	Ascomycota	Leotiomycetes	Helotiales	Helotiaceae	Crocicreas	NA
OTU423	0	0	0	0	0	0	0	0	0	0	0	0	0	0	0	0	0	0	0	0	83	0	0	0	0	0	0	0	Fungi	Ascomycota	Dothideomycetes	Pleosporales	NA	NA	NA
OTU424	0	0	12	0	31	0	11	9	5	0	0	0	0	6	0	0	0	0	0	0	0	0	0	0	5	27	0	15	Fungi	Ascomycota	Leotiomycetes	Helotiales	Hyaloscyphaceae	Cistella	NA
OTU425	0	0	0	0	0	0	0	0	0	0	0	0	0	0	0	0	0	0	0	0	33	0	0	25	13	0	51	15	Fungi	Ascomycota	Sordariomycetes	Sordariales	Lasiosphaeriaceae	Schizothecium	NA
OTU428	0	0	0	0	0	0	0	0	0	0	0	0	0	0	0	0	0	0	0	0	0	0	80	0	0	0	0	0	Fungi	Basidiomycota	Agaricomycetes	Polyporales	Ganodermataceae	Ganoderma	NA
OTU433	0	0	0	0	0	0	0	0	0	0	0	0	0	0	0	0	0	0	0	0	0	0	0	0	79	0	0	0	Fungi	Monoblepharomycota	Sanchytriomycetes	Sanchytriales	Sanchytriaceae	Sanchytrium	NA
OTU436	0	0	0	0	0	0	0	0	0	0	0	0	0	0	0	0	0	0	0	24	0	51	0	0	0	0	0	0	Fungi	Ascomycota	Dothideomycetes	Pleosporales	Pleosporaceae	Drechslera	NA
OTU443	0	17	2	20	18	0	1	10	0	0	0	0	0	0	0	0	0	0	0	0	0	0	0	0	0	0	0	17	Fungi	Basidiomycota	Cystobasidiomycetes	Erythrobasidiales	NA	NA	NA
OTU444	0	0	4	5	4	0	0	1	5	0	0	0	0	0	0	0	0	0	0	0	23	5	83	443	17	25	18	0	Fungi	Ascomycota	Dothideomycetes	Venturiales	Sympoventuriaceae	Ochroconis	NA
OTU445	0	0	0	0	0	0	1	0	0	0	0	0	0	0	0	0	0	0	0	0	0	0	0	0	72	0	0	0	Fungi	Ascomycota	Sordariomycetes	Hypocreales	Bionectriaceae	Gliomastix	murorum
OTU446	0	11	0	1	1	0	0	0	0	0	0	0	0	0	0	0	0	0	0	0	62	0	0	0	0	0	0	0	Fungi	Ascomycota	Eurotiomycetes	Chaetothyriales	Trichomeriaceae	Knufia	NA
OTU447	0	0	0	0	1	0	0	0	0	0	0	0	0	0	2	0	0	0	0	0	0	3	0	0	73	0	6	0	Fungi	Basidiomycota	Cystobasidiomycetes	Cystobasidiales	Cystobasidiaceae	Occultifur	NA
OTU448	0	0	0	0	0	0	0	0	0	0	0	0	0	0	0	0	0	0	0	0	0	0	0	0	0	0	71	0	Fungi	Ascomycota	Leotiomycetes	Helotiales	NA	NA	NA
OTU453	0	0	0	0	0	0	0	0	0	0	0	0	0	0	0	0	0	0	0	0	0	53	8	0	18	0	0	0	Fungi	Ascomycota	Dothideomycetes	Venturiales	Sympoventuriaceae	Ochroconis	NA
OTU455	0	0	0	0	0	0	0	0	0	0	0	0	0	0	0	0	0	0	0	0	0	0	0	0	0	0	0	67	Fungi	Basidiomycota	Agaricomycetes	Agaricales	Lycoperdaceae	Disciseda	NA
OTU458	0	0	0	43	2	0	0	18	2	0	0	0	0	0	0	0	0	0	0	0	0	0	0	0	0	0	0	0	Fungi	Ascomycota	Dothideomycetes	Pleosporales	Lentitheciaceae	NA	NA
OTU461	2	37	1	0	0	0	0	0	0	0	0	0	0	0	0	0	0	0	0	0	12	23	0	23	0	0	0	24	Fungi	Ascomycota	Sordariomycetes	Sordariales	Chaetomiaceae	Chaetomium	subspirilliferum
OTU464	0	0	1	0	0	0	0	0	0	0	0	0	0	0	0	0	0	0	0	0	31	13	17	0	0	0	0	0	Fungi	Ascomycota	Dothideomycetes	Pleosporales	Amniculicolaceae	Murispora	NA
OTU466	0	0	0	0	0	0	0	0	0	0	0	2	0	0	0	0	0	0	0	0	38	0	0	0	0	0	0	24	Fungi	Ascomycota	Eurotiomycetes	Eurotiales	Aspergillaceae	Penicillium	brevicompactum
OTU468	0	0	0	0	0	0	0	0	0	0	0	0	0	0	0	0	0	0	0	0	0	0	61	0	0	0	0	0	Fungi	Ascomycota	Sordariomycetes	Hypocreales	Hypocreales_fam_Incertae_sedis	Acremonium	tubakii
OTU471	6	0	0	0	0	0	1	0	2	0	0	0	0	0	0	0	0	0	0	0	0	0	0	59	0	0	0	0	Fungi	Ascomycota	Sordariomycetes	Myrmecridiales	Myrmecridiaceae	Myrmecridium	schulzeri
OTU472	0	0	0	0	0	0	0	0	0	0	0	0	0	0	0	0	0	0	0	0	0	0	0	0	60	0	0	0	Fungi	Mortierellomycota	Mortierellomycetes	Mortierellales	Mortierellaceae	Mortierella	fimbricystis
OTU473	0	1	1	7	1	0	0	0	0	0	0	0	0	0	0	0	0	0	0	0	0	0	0	7	0	1	0	49	Fungi	Ascomycota	Sordariomycetes	Sordariales	Chaetomiaceae	Dichotomopilus	indicus
OTU477	0	4	2	46	7	0	0	1	0	0	0	0	0	0	0	0	0	0	0	0	0	0	0	0	0	0	0	0	Fungi	Basidiomycota	Cystobasidiomycetes	Cystobasidiales	Cystobasidiaceae	Cystobasidium	minuta
OTU478	0	2	17	8	17	0	0	5	0	0	0	0	0	0	0	0	0	0	0	0	0	0	0	0	0	11	2	0	Fungi	Basidiomycota	Tremellomycetes	Filobasidiales	Filobasidiaceae	Filobasidium	NA
OTU479	0	0	7	58	0	0	0	1	0	0	0	0	0	0	0	0	0	0	0	0	0	0	0	0	0	0	0	0	Fungi	Ascomycota	Dothideomycetes	Dothideales	Aureobasidiaceae	Aureobasidium	subglaciale
OTU485	0	0	0	0	0	0	0	0	0	0	0	0	0	0	0	0	0	0	0	0	0	17	0	0	0	31	0	58	Fungi	Ascomycota	Sordariomycetes	Hypocreales	Hypocreaceae	Trichoderma	NA
OTU488	0	0	0	0	0	0	0	0	0	0	0	0	0	0	0	0	0	0	0	0	0	55	0	0	0	0	0	0	Fungi	Ascomycota	Eurotiomycetes	Eurotiales	Aspergillaceae	Penicillium	NA
OTU489	0	0	0	0	0	0	0	0	0	0	0	0	0	0	0	0	0	0	0	0	0	0	0	0	0	0	56	0	Fungi	Mucoromycota	Mucoromycetes	Mucorales	Cunninghamellaceae	Absidia	glauca
OTU492	0	58	0	0	0	0	0	0	0	0	0	0	0	0	0	0	0	0	0	0	0	0	0	0	0	0	0	0	Fungi	Ascomycota	Dothideomycetes	Pleosporales	Sporormiaceae	Preussia	tenerifae
OTU495	0	0	0	0	0	0	0	0	0	0	0	0	0	0	0	0	0	0	0	0	31	23	0	0	0	0	0	0	Fungi	Ascomycota	Leotiomycetes	Helotiales	Helotiaceae	Tetracladium	NA
OTU497	0	1	0	0	0	0	0	0	0	0	0	0	0	0	0	0	0	0	0	0	0	47	0	0	0	0	0	0	Fungi	Ascomycota	Eurotiomycetes	Eurotiales	Aspergillaceae	Penicillium	simplicissimum
OTU498	0	0	0	1	4	0	1	1	0	0	0	0	0	0	0	0	0	0	0	0	0	54	0	0	0	0	0	0	Fungi	Ascomycota	Sordariomycetes	Coniochaetales	Coniochaetaceae	NA	NA
OTU499	0	0	0	0	0	0	0	0	0	0	0	0	0	0	0	0	0	0	0	0	0	0	0	82	0	0	0	0	Fungi	Ascomycota	Sordariomycetes	Sordariales	Lasiosphaeriaceae	Schizothecium	NA
OTU501	0	0	0	1	0	0	0	0	0	0	0	0	0	0	0	0	0	0	0	0	0	52	0	10	0	0	9	0	Fungi	Ascomycota	Sordariomycetes	Hypocreales	Hypocreales_fam_Incertae_sedis	Acremonium	persicinum
OTU504	0	6	5	20	16	0	0	19	2	0	0	0	0	0	0	0	0	0	0	0	0	0	0	0	0	0	0	0	Fungi	Basidiomycota	Tremellomycetes	Tremellales	Bulleribasidiaceae	Dioszegia	butyracea
OTU507	0	0	0	0	0	0	0	0	0	0	0	0	0	0	0	0	0	0	0	0	51	0	0	0	0	0	0	0	Fungi	Ascomycota	Leotiomycetes	Helotiales	Hyaloscyphaceae	Trichopezizella	NA
OTU509	0	2	0	0	0	0	0	0	0	0	0	0	0	0	0	0	0	0	0	8	8	0	0	0	0	1	0	32	Fungi	Basidiomycota	Agaricomycetes	Russulales	Stereaceae	Stereum	hirsutum
OTU510	0	0	0	0	0	0	0	0	0	0	0	0	0	0	0	0	0	0	0	0	0	0	0	12	16	0	24	0	Fungi	Ascomycota	Sordariomycetes	Hypocreales	Hypocreaceae	Trichoderma	NA
OTU511	0	0	0	0	0	0	0	0	0	0	0	0	0	0	0	0	0	0	0	0	0	0	0	0	51	0	0	0	Fungi	Ascomycota	Dothideomycetes	Pleosporales	Pleomassariaceae	NA	NA
OTU513	0	9	3	1	6	0	2	19	8	0	0	0	0	0	0	0	0	0	0	0	0	0	0	0	0	0	1	0	Fungi	Ascomycota	Leotiomycetes	Helotiales	Helotiaceae	Crocicreas	NA
OTU514	0	0	0	3	36	0	1	29	0	0	0	0	0	0	0	0	0	0	0	0	0	0	0	0	0	0	0	0	Fungi	Basidiomycota	Tremellomycetes	Tremellales	Bulleribasidiaceae	Hannaella	coprosmae
OTU517	0	0	0	0	0	0	0	1	0	0	0	0	0	0	0	48	0	0	0	1	3	2	1	9	3	3	4	1	Fungi	Ascomycota	Leotiomycetes	Thelebolales	Pseudeurotiaceae	Pseudogymnoascus	pannorum
OTU518	0	0	0	0	0	0	0	0	0	0	0	0	0	0	0	0	0	0	0	11	0	0	37	0	0	0	0	0	Fungi	Olpidiomycota	Olpidiomycetes	Olpidiales	Olpidiaceae	Olpidium	brassicae
OTU519	0	0	0	0	0	0	0	0	0	0	0	0	0	0	0	0	0	0	0	0	0	0	0	49	0	0	0	0	Fungi	Basidiomycota	Agaricomycetes	Boletales	Suillaceae	Suillus	granulatus
OTU520	1	0	7	0	0	0	0	0	0	0	0	0	42	0	0	0	0	0	0	0	0	0	0	0	0	4	0	0	Fungi	Ascomycota	Leotiomycetes	Helotiales	Helotiales_fam_Incertae_sedis	Rhynchosporium	secalis
OTU522	0	0	0	0	0	0	0	0	0	0	0	0	0	0	0	0	0	0	0	41	0	0	7	2	0	0	0	0	Fungi	Ascomycota	Leotiomycetes	Helotiales	NA	NA	NA
OTU527	0	0	0	0	0	0	0	0	0	0	0	0	0	0	0	0	0	0	0	47	0	0	0	0	0	0	0	0	Fungi	Basidiomycota	Microbotryomycetes	Sporidiobolales	Sporidiobolaceae	Sporobolomyces	roseus
OTU528	0	0	0	0	0	0	0	0	0	0	0	0	0	0	0	0	0	0	0	0	46	0	0	0	0	0	0	0	Fungi	Mucoromycota	Mucoromycetes	Mucorales	Mucoraceae	Mucor	circinelloides
OTU529	0	0	0	0	0	0	0	0	0	0	0	0	0	0	0	0	0	0	0	0	0	0	49	0	0	0	0	0	Fungi	Basidiobolomycota	Basidiobolomycetes	Basidiobolales	NA	NA	NA
OTU531	0	0	13	0	31	0	0	3	0	0	0	0	0	0	0	0	0	0	0	0	0	0	0	0	0	0	0	0	Fungi	Basidiomycota	Tremellomycetes	Cystofilobasidiales	Mrakiaceae	Udeniomyces	puniceus
OTU533	0	0	14	0	0	0	0	0	0	0	0	0	0	0	0	0	0	0	0	0	0	0	0	0	0	0	31	0	Fungi	Ascomycota	Dothideomycetes	Pleosporales	Phaeosphaeriaceae	NA	NA
OTU534	9	0	0	0	0	0	0	0	0	0	0	0	0	0	0	0	0	0	0	0	0	45	0	0	0	0	0	0	Fungi	Ascomycota	Leotiomycetes	Helotiales	Helotiaceae	Tetracladium	NA
OTU535	0	0	0	0	0	0	0	0	0	0	0	0	0	0	0	0	0	0	0	0	0	0	0	45	0	0	16	0	Fungi	Basidiomycota	Tremellomycetes	NA	NA	NA	NA
OTU536	0	1	8	10	5	0	0	7	0	0	0	0	0	0	0	0	0	0	0	0	0	6	0	2	0	11	0	0	Fungi	Basidiomycota	Tremellomycetes	Filobasidiales	Piskurozymaceae	Solicoccozyma	fuscescens
OTU537	0	1	8	11	2	0	0	6	0	0	0	0	0	0	0	0	0	0	0	0	0	0	0	0	18	0	0	0	Fungi	Basidiomycota	Cystobasidiomycetes	Cystobasidiales	Cystobasidiaceae	Cystobasidium	pinicola
OTU538	0	0	0	0	0	0	0	0	0	0	0	0	0	0	0	0	0	0	0	0	45	0	0	0	0	0	0	0	Fungi	Ascomycota	Eurotiomycetes	Eurotiales	Aspergillaceae	Penicillium	NA
OTU540	0	0	0	1	7	0	0	0	0	0	0	0	0	0	0	0	0	0	0	0	0	0	37	0	0	0	0	0	Fungi	Basidiomycota	Cystobasidiomycetes	Cystobasidiales	Cystobasidiaceae	Cystobasidium	lysinophilum
OTU543	0	0	0	0	0	0	0	0	0	0	0	0	0	0	0	0	0	0	0	0	14	0	0	0	5	0	0	24	Fungi	Ascomycota	Eurotiomycetes	Eurotiales	Aspergillaceae	Penicillium	NA
OTU544	0	0	0	0	0	0	0	0	0	0	0	0	0	0	0	0	0	0	0	0	11	0	0	0	0	0	0	33	Fungi	Basidiomycota	Malasseziomycetes	Malasseziales	NA	NA	NA
OTU546	0	0	0	0	0	0	0	0	0	0	0	0	0	0	0	0	0	0	0	0	0	0	0	0	18	27	0	0	Fungi	Mortierellomycota	Mortierellomycetes	Mortierellales	Mortierellaceae	Mortierella	NA
OTU548	0	2	0	4	13	0	1	16	5	0	0	0	0	0	0	0	0	0	0	0	0	0	0	3	0	0	0	0	Fungi	Ascomycota	Leotiomycetes	Helotiales	Helotiaceae	Crocicreas	NA
OTU550	0	0	0	0	0	0	0	43	0	0	0	0	0	0	0	0	0	0	0	0	0	0	0	0	0	0	0	0	Fungi	Ascomycota	Sordariomycetes	Hypocreales	Stachybotryaceae	Myrothecium	NA
OTU553	1	1	2	15	3	0	4	2	0	0	0	0	0	0	0	0	0	0	0	0	0	0	0	0	0	8	0	6	Fungi	Ascomycota	Sordariomycetes	Hypocreales	Hypocreales_fam_Incertae_sedis	Sarocladium	NA
OTU555	0	0	0	0	0	0	0	0	0	0	0	0	0	0	0	0	0	0	0	0	0	26	0	0	0	0	0	14	Fungi	Ascomycota	Sordariomycetes	Hypocreales	Nectriaceae	Fusarium	concentricum
OTU557	0	0	0	0	0	0	0	0	0	0	0	0	0	0	0	0	0	0	0	0	0	0	28	13	0	0	0	0	Fungi	Ascomycota	Sordariomycetes	Hypocreales	Hypocreaceae	Trichoderma	NA
OTU558	0	0	0	0	0	0	0	0	0	0	0	0	0	0	0	0	0	0	0	0	0	0	0	0	39	0	0	0	Fungi	Ascomycota	Sordariomycetes	Myrmecridiales	Myrmecridiaceae	Myrmecridium	hiemale
OTU559	0	1	9	4	7	0	0	19	0	0	0	0	0	0	0	0	0	0	0	0	0	0	0	0	0	0	0	0	Fungi	Basidiomycota	Tremellomycetes	Filobasidiales	Filobasidiaceae	Filobasidium	oeirense
OTU565	0	0	4	2	17	0	0	0	0	0	0	0	0	0	0	0	0	0	0	0	0	0	0	0	0	0	0	15	Fungi	Basidiomycota	Cystobasidiomycetes	NA	NA	NA	NA
OTU567	0	0	27	20	20	0	4	12	0	0	0	0	0	0	0	0	0	0	0	0	0	0	0	0	37	15	5	1	Fungi	Ascomycota	Leotiomycetes	Helotiales	Helotiaceae	Tetracladium	NA
OTU568	0	13	5	10	3	1	0	11	1	0	0	0	0	0	0	0	0	0	0	0	0	0	0	0	0	7	0	0	Fungi	Ascomycota	Dothideomycetes	Venturiales	Sympoventuriaceae	Ochroconis	NA
OTU569	0	0	0	0	0	0	0	0	0	0	0	0	0	0	0	0	0	0	0	0	0	0	36	0	0	0	0	0	Fungi	Basidiomycota	Agaricomycetes	Polyporales	Steccherinaceae	Steccherinum	fimbriatum
OTU573	0	0	0	0	0	0	0	2	0	0	0	0	0	0	0	0	0	0	0	0	0	0	0	36	0	0	0	0	Fungi	Ascomycota	Sordariomycetes	Hypocreales	Bionectriaceae	Clonostachys	rosea
OTU574	0	0	0	0	0	0	0	0	0	0	0	0	0	0	0	0	0	0	0	0	0	0	1	0	0	0	0	36	Fungi	Ascomycota	Leotiomycetes	Helotiales	Helotiaceae	Tetracladium	apiense
OTU575	0	0	6	11	30	0	2	6	0	0	0	0	0	0	0	0	0	0	0	0	0	0	0	0	0	0	0	0	Fungi	Basidiomycota	Tremellomycetes	Tremellales	Bulleribasidiaceae	Dioszegia	changbaiensis
OTU576	0	0	0	35	4	0	2	0	0	0	0	0	0	0	0	0	0	0	0	0	0	0	0	0	0	0	0	0	Fungi	Ascomycota	Dothideomycetes	Pleosporales	Pleosporaceae	Alternaria	rosae
OTU578	0	0	0	0	0	0	0	0	0	0	0	0	0	0	0	0	0	0	0	0	0	0	0	0	11	30	5	36	Fungi	Ascomycota	Sordariomycetes	Sordariales	Lasiosphaeriaceae	Schizothecium	miniglutinans
OTU579	0	0	0	0	0	0	0	0	0	0	0	0	0	0	0	0	0	0	0	0	0	0	0	0	0	0	0	34	Fungi	Basidiomycota	Agaricomycetes	Geastrales	Geastraceae	Geastrum	fuscogleba
OTU580	0	0	0	2	0	0	0	0	0	0	0	0	0	0	0	0	0	0	0	0	32	0	0	0	0	0	0	0	Fungi	Ascomycota	Dothideomycetes	Venturiales	NA	NA	NA
OTU582	0	0	0	0	0	0	0	0	0	0	0	0	0	0	0	0	0	0	0	0	34	0	0	0	0	0	0	0	Fungi	Ascomycota	Dothideomycetes	Venturiales	Sympoventuriaceae	Ochroconis	NA
OTU585	0	0	0	0	0	0	0	0	0	0	0	0	0	0	0	0	0	0	0	0	0	0	0	0	0	0	0	34	Fungi	Basidiomycota	Agaricomycetes	NA	NA	NA	NA
OTU586	0	0	6	0	0	0	0	0	0	0	0	0	0	0	0	0	0	0	0	0	18	12	0	0	0	0	0	0	Fungi	Ascomycota	Dothideomycetes	Pleosporales	NA	NA	NA
OTU590	0	0	0	1	0	0	0	0	0	0	0	0	0	0	0	0	0	0	0	0	0	0	0	32	0	0	0	0	Fungi	Ascomycota	Dothideomycetes	Pleosporales	Periconiaceae	Periconia	NA
OTU592	0	2	0	0	0	0	0	0	0	0	0	0	30	0	0	0	0	0	0	0	0	0	0	0	0	0	0	0	Fungi	Mucoromycota	Mucoromycetes	Mucorales	Mucoraceae	Actinomucor	elegans
OTU593	0	0	2	23	0	0	0	7	0	0	0	0	0	0	0	0	0	0	0	0	0	0	0	0	0	0	0	0	Fungi	Basidiomycota	Tremellomycetes	Holtermanniales	Holtermanniales_fam_Incertae_sedis	Holtermanniella	takashimae
OTU595	0	3	0	0	0	0	0	0	0	0	0	0	0	0	0	0	0	0	0	0	0	0	0	31	0	0	0	0	Fungi	Ascomycota	Leotiomycetes	Helotiales	Helotiaceae	Tetracladium	NA
OTU596	0	1	0	2	2	0	0	0	0	0	0	0	0	0	0	0	0	0	0	0	0	0	0	0	31	0	0	0	Fungi	Ascomycota	Eurotiomycetes	Chaetothyriales	Herpotrichiellaceae	Exophiala	NA
OTU597	0	0	0	2	0	0	0	2	0	0	0	0	0	0	0	0	0	0	0	0	0	0	0	0	0	0	0	25	Fungi	Ascomycota	Leotiomycetes	Helotiales	Helotiaceae	Tetracladium	NA
OTU604	0	0	0	0	0	0	0	0	0	0	0	0	0	0	0	0	0	0	0	0	0	0	0	0	40	0	0	0	Fungi	Basidiomycota	Agaricomycetes	Auriculariales	NA	NA	NA
OTU609	0	0	0	0	30	0	1	1	0	0	0	0	0	0	0	0	0	0	0	0	0	0	0	0	0	0	0	0	Fungi	Ascomycota	Dothideomycetes	Pleosporales	Phaeosphaeriaceae	Phaeosphaeria	caricicola
OTU610	0	6	0	1	32	0	0	1	0	0	0	0	0	0	0	0	0	0	0	0	0	0	0	0	0	0	0	0	Fungi	Basidiomycota	Microbotryomycetes	Leucosporidiales	Leucosporidiaceae	Leucosporidium	drummii
OTU611	1	5	0	0	0	0	0	0	0	5	0	0	0	0	0	0	0	0	0	0	0	0	0	0	24	0	0	0	Fungi	Ascomycota	Eurotiomycetes	Eurotiales	Aspergillaceae	Penicillium	bialowiezense
OTU613	0	0	0	0	0	0	0	0	0	0	0	0	0	0	0	0	0	0	0	29	0	0	0	0	0	0	0	0	Fungi	Basidiomycota	Agaricomycetes	Agaricales	Psathyrellaceae	Psathyrella	sublatispora
OTU615	0	0	0	0	0	0	0	0	0	0	0	0	0	0	0	0	0	0	0	0	0	0	0	0	0	0	0	29	Fungi	Ascomycota	Sordariomycetes	Glomerellales	Plectosphaerellaceae	Acrostalagmus	luteoalbus
OTU619	2	0	0	0	0	0	0	0	0	0	0	0	0	0	0	0	0	0	0	0	0	30	0	0	0	0	0	0	Fungi	Ascomycota	Dothideomycetes	Pleosporales	Torulaceae	Dendryphion	europaeum
OTU622	0	0	0	0	0	0	0	0	0	0	0	0	0	0	0	0	0	0	0	0	0	0	0	31	0	0	0	0	Fungi	Ascomycota	Dothideomycetes	Venturiales	Sympoventuriaceae	Ochroconis	NA
OTU623	0	0	0	0	0	0	0	0	0	0	0	0	0	0	0	0	0	0	0	0	0	0	0	3	8	0	0	17	Fungi	Basidiomycota	Agaricomycetes	Hymenochaetales	Schizoporaceae	Xylodon	raduloides
OTU626	0	0	0	0	0	0	0	0	0	0	0	0	0	0	0	0	0	0	0	0	0	29	0	0	0	0	0	0	Fungi	Basidiomycota	Agaricomycetes	Agaricales	Lycoperdaceae	Bovista	NA
OTU627	0	3	0	0	2	0	0	3	1	0	0	0	0	0	0	0	0	0	0	0	0	0	27	0	0	0	0	0	Fungi	Ascomycota	Dothideomycetes	Pleosporales	Didymellaceae	Didymella	NA
OTU628	0	0	0	0	0	0	0	0	0	0	0	3	0	7	0	0	3	3	0	0	15	2	11	0	29	6	28	43	Fungi	Basidiomycota	Malasseziomycetes	Malasseziales	Malasseziaceae	Malassezia	globosa
OTU630	1	23	1	0	2	0	0	4	0	0	0	0	0	0	0	0	0	0	0	0	0	0	0	0	0	0	0	0	Fungi	Ascomycota	Eurotiomycetes	Chaetothyriales	Trichomeriaceae	Knufia	cryptophialidica
OTU631	0	1	0	0	0	0	0	0	0	0	0	0	0	0	0	0	0	0	0	0	0	0	0	0	0	0	0	19	Fungi	Basidiomycota	Agaricomycetes	Polyporales	Fomitopsidaceae	Antrodia	xantha
OTU635	0	0	0	0	0	0	0	0	0	0	0	0	0	0	0	0	0	0	0	26	0	0	0	0	0	0	0	0	Fungi	Basidiomycota	Agaricomycetes	Polyporales	Meripilaceae	Meripilus	giganteus
OTU636	0	0	0	0	0	0	0	0	0	0	0	0	0	0	0	0	0	0	0	0	26	0	0	1	0	0	0	0	Fungi	Ascomycota	Eurotiomycetes	Onygenales	Gymnoascaceae	Leucothecium	emdenii
OTU638	0	0	0	0	0	0	0	0	0	0	0	0	0	0	0	0	0	0	0	0	0	0	26	0	0	0	0	0	Fungi	Ascomycota	Leotiomycetes	Helotiales	Helotiaceae	Scytalidium	lignicola
OTU640	0	0	0	0	0	0	0	0	0	0	0	0	0	0	0	0	0	0	0	0	0	0	0	0	0	0	27	0	Fungi	Ascomycota	Leotiomycetes	Helotiales	Hyaloscyphaceae	Calycina	ellisii
OTU641	0	0	0	0	0	0	0	0	0	0	0	0	0	0	0	0	0	0	0	0	0	0	0	0	0	0	27	0	Fungi	Ascomycota	Sordariomycetes	Sordariales	Chaetomiaceae	NA	NA
OTU642	0	0	0	0	0	0	0	0	0	0	0	0	0	0	0	0	0	0	0	0	0	0	0	0	0	0	0	26	Fungi	Ascomycota	Dothideomycetes	Pleosporales	Periconiaceae	Periconia	NA
OTU643	0	0	0	0	6	0	0	3	0	0	0	0	0	0	0	0	0	0	0	0	0	7	0	0	0	6	3	0	Fungi	Ascomycota	Sordariomycetes	Hypocreales	Cordycipitaceae	Beauveria	NA
OTU645	0	0	0	0	0	0	0	0	0	0	0	0	0	0	0	0	0	0	0	0	0	26	0	0	0	0	0	0	Fungi	Basidiomycota	Agaricomycetes	Russulales	Peniophoraceae	Peniophora	laeta
OTU646	0	0	0	0	0	0	0	0	0	0	0	0	0	0	0	0	0	0	0	0	0	25	0	0	0	0	0	0	Fungi	Ascomycota	Sordariomycetes	Hypocreales	Hypocreales_fam_Incertae_sedis	Acremonium	fusidioides
OTU647	0	0	0	0	0	0	0	0	0	0	0	0	0	0	0	0	0	0	0	0	0	0	47	0	0	0	0	0	Fungi	Basidiomycota	Agaricomycetes	Polyporales	Fomitopsidaceae	Piptoporus	betulinus
OTU651	0	0	0	0	0	0	0	0	0	0	0	0	0	0	0	0	0	0	0	0	0	0	0	0	14	12	0	0	Fungi	Ascomycota	Sordariomycetes	Hypocreales	Nectriaceae	NA	NA
OTU652	0	0	0	0	0	0	0	0	0	0	0	0	0	0	0	0	0	0	0	0	0	0	0	0	0	25	0	0	Fungi	Ascomycota	Dothideomycetes	Pleosporales	NA	NA	NA
OTU653	0	0	0	0	0	0	0	0	0	0	0	0	0	0	0	0	0	0	0	0	0	0	0	0	0	0	25	0	Fungi	Basidiomycota	Agaricomycetes	Boletales	Tapinellaceae	Pseudomerulius	aureus
OTU654	0	0	0	0	0	0	0	0	0	0	0	0	0	0	0	0	0	0	0	0	0	0	0	0	0	0	0	25	Fungi	Ascomycota	Dothideomycetes	Dothideomycetes_ord_Incertae_sedis	Eremomycetaceae	Arthrographis	longispora
OTU655	0	2	0	0	0	0	0	2	0	0	0	0	0	0	0	0	0	0	0	19	0	0	0	0	0	0	0	0	Fungi	Ascomycota	Eurotiomycetes	Chaetothyriales	Trichomeriaceae	Knufia	NA
OTU659	0	0	0	0	0	0	0	0	0	0	0	0	0	0	0	0	0	0	0	0	24	0	0	5	0	0	0	0	Fungi	Ascomycota	Leotiomycetes	Helotiales	Helotiales_fam_Incertae_sedis	Cadophora	NA
OTU660	0	0	0	0	0	0	0	0	0	0	0	0	0	0	0	0	0	0	0	0	0	19	5	0	0	0	0	0	Fungi	Ascomycota	Sordariomycetes	Hypocreales	Hypocreaceae	NA	NA
OTU662	0	0	0	0	0	0	0	0	0	0	0	0	0	0	0	0	0	0	0	0	0	0	0	0	24	0	0	0	Fungi	Ascomycota	Eurotiomycetes	Onygenales	Gymnoascaceae	Gymnoascus	reessii
OTU663	0	0	0	0	0	0	0	0	0	0	0	0	0	0	0	0	0	0	0	0	0	0	0	0	3	20	0	0	Fungi	Ascomycota	Sordariomycetes	Hypocreales	Cordycipitaceae	Lecanicillium	lecanii
OTU664	0	0	0	0	0	0	0	0	0	0	0	0	0	0	0	0	0	0	0	0	0	0	0	0	0	25	1	0	Fungi	Chytridiomycota	NA	NA	NA	NA	NA
OTU665	0	0	0	0	0	0	0	0	0	0	0	0	0	0	0	0	0	0	0	0	0	0	0	0	8	0	0	24	Fungi	Ascomycota	Eurotiomycetes	Eurotiales	Trichocomaceae	Talaromyces	rugulosus
OTU666	4	0	0	1	0	0	5	14	0	0	0	0	0	0	0	0	0	0	0	0	0	0	0	0	0	0	0	0	Fungi	Ascomycota	Dothideomycetes	Pleosporales	Didymosphaeriaceae	Paraphaeosphaeria	NA
OTU667	0	0	4	1	7	0	0	0	0	0	0	0	0	0	0	0	0	0	0	0	0	0	0	0	0	14	0	0	Fungi	Ascomycota	Sordariomycetes	Sordariales	Chaetomiaceae	Humicola	grisea
OTU671	0	0	0	0	0	0	0	0	0	0	0	0	0	0	0	0	0	0	0	0	25	0	0	0	0	0	0	0	Fungi	Ascomycota	Sordariomycetes	Hypocreales	Niessliaceae	NA	NA
OTU673	0	0	0	0	0	0	0	0	0	0	0	0	0	0	0	0	0	0	0	0	0	0	0	23	0	0	0	0	Fungi	Ascomycota	Eurotiomycetes	Eurotiales	Aspergillaceae	Phialosimplex	NA
OTU675	0	0	0	0	0	0	0	0	0	0	0	0	0	0	0	0	0	0	0	0	0	0	0	0	0	0	0	23	Fungi	Mortierellomycota	Mortierellomycetes	Mortierellales	Mortierellaceae	Mortierella	NA
OTU676	0	0	0	0	0	0	0	0	0	0	0	0	0	0	0	0	0	0	0	0	0	0	0	0	0	0	0	22	Fungi	Ascomycota	Eurotiomycetes	Eurotiales	Aspergillaceae	Penicillium	atrosanguineum
OTU677	0	0	5	6	4	0	0	12	0	0	0	0	0	0	0	0	0	0	0	0	0	0	0	0	0	0	0	0	Fungi	Basidiomycota	Tremellomycetes	Filobasidiales	Filobasidiaceae	Filobasidium	wieringae
OTU681	0	0	0	0	0	0	0	0	0	0	0	0	0	0	0	0	0	0	0	22	0	0	0	0	0	2	0	0	Fungi	Ascomycota	Sordariomycetes	Xylariales	Xylariaceae	Biscogniauxia	nummularia
OTU682	0	0	0	0	0	0	0	0	0	0	0	0	0	0	0	0	0	0	0	0	22	0	0	0	0	0	0	0	Fungi	Ascomycota	Eurotiomycetes	Chaetothyriales	Herpotrichiellaceae	Exophiala	bonariae
OTU683	0	0	0	0	0	0	0	0	0	0	0	0	0	0	0	0	0	0	0	0	0	29	0	0	0	0	0	0	Fungi	Ascomycota	Dothideomycetes	Pleosporales	Leptosphaeriaceae	Plenodomus	biglobosus
OTU684	0	0	0	0	0	0	0	0	0	0	0	0	0	0	0	0	0	0	0	0	0	0	22	0	0	0	0	0	Fungi	Ascomycota	Sordariomycetes	Hypocreales	Hypocreales_fam_Incertae_sedis	Acremonium	rutilum
OTU688	0	0	0	0	0	0	0	0	0	0	0	0	0	0	0	0	0	0	0	0	0	0	0	0	23	0	0	0	Fungi	Ascomycota	Eurotiomycetes	Eurotiales	Trichocomaceae	Thermomyces	lanuginosus
OTU694	0	0	0	0	0	0	0	0	0	0	0	0	0	0	0	0	0	0	0	0	21	0	0	0	0	0	0	0	Fungi	Mucoromycota	Mucoromycetes	Mucorales	Mucoraceae	Mucor	circinelloides
OTU695	0	0	0	0	0	0	0	0	0	0	0	0	0	0	0	0	0	0	0	0	14	0	0	0	0	7	0	0	Fungi	Basidiomycota	Agaricomycetes	Agaricomycetes_ord_Incertae_sedis	Agaricomycetes_fam_Incertae_sedis	Akenomyces	costatus
OTU696	0	0	0	0	0	0	0	0	0	0	0	0	0	0	0	0	0	0	0	0	0	0	21	0	0	0	0	0	Fungi	Ascomycota	Lecanoromycetes	NA	NA	NA	NA
OTU698	0	0	1	0	0	0	0	0	0	0	0	0	0	0	0	0	0	0	0	0	0	0	0	0	21	0	0	0	Fungi	Ascomycota	Dothideomycetes	Venturiales	Sympoventuriaceae	Ochroconis	NA
OTU699	0	21	0	0	0	0	0	0	1	0	0	0	0	0	0	0	0	0	0	0	0	0	0	0	0	0	0	0	Fungi	Ascomycota	Dothideomycetes	Pleosporales	Periconiaceae	Periconia	pseudodigitata
OTU700	1	0	3	2	0	0	0	0	0	0	0	0	0	0	13	0	4	0	0	0	0	0	0	0	0	0	0	0	Fungi	Ascomycota	Dothideomycetes	Capnodiales	Teratosphaeriaceae	Elasticomyces	elasticus
OTU708	0	0	0	0	0	0	0	0	0	0	0	0	0	0	0	0	0	0	0	0	20	0	0	0	0	0	0	0	Fungi	Ascomycota	Orbiliomycetes	Orbiliales	Orbiliaceae	NA	NA
OTU712	0	0	0	0	0	0	0	0	0	0	0	0	0	0	0	0	0	0	0	0	0	0	0	0	0	0	0	20	Fungi	Ascomycota	Eurotiomycetes	Chaetothyriales	Herpotrichiellaceae	Exophiala	NA
OTU713	0	0	0	0	0	0	0	0	0	0	0	0	0	0	0	0	0	0	0	0	0	0	0	0	0	0	0	20	Fungi	Ascomycota	Eurotiomycetes	Eurotiales	Aspergillaceae	Aspergillus	awamori
OTU714	0	17	2	0	1	0	0	0	0	0	0	0	0	0	0	0	0	0	0	0	0	0	0	0	0	0	0	0	Fungi	Ascomycota	Leotiomycetes	Helotiales	Helotiaceae	Crocicreas	NA
OTU716	0	3	0	0	0	0	0	3	1	0	0	0	0	0	0	0	0	0	0	0	0	0	0	0	5	0	8	0	Fungi	Ascomycota	Dothideomycetes	Venturiales	Sympoventuriaceae	Ochroconis	NA
OTU717	0	0	19	0	2	0	0	0	0	0	0	0	0	0	0	0	0	0	0	0	0	0	0	0	0	0	0	0	Fungi	Basidiomycota	Tremellomycetes	Cystofilobasidiales	Mrakiaceae	Mrakia	frigida
OTU718	0	0	0	0	0	0	0	13	0	0	0	0	0	0	0	0	0	0	0	0	0	0	4	0	0	0	0	0	Fungi	Ascomycota	Leotiomycetes	Helotiales	Hyaloscyphaceae	Cistella	grevillei
OTU719	0	0	0	0	0	0	0	19	0	0	0	0	0	0	0	0	0	0	0	0	0	0	0	0	0	0	0	0	Fungi	Basidiomycota	Agaricomycetes	Agaricales	Typhulaceae	Typhula	ishikariensis
OTU721	0	0	1	0	2	0	1	0	0	0	0	0	0	0	0	0	0	0	0	0	20	0	0	0	0	0	0	0	Fungi	Ascomycota	Sordariomycetes	Coniochaetales	Coniochaetaceae	Lecythophora	NA
OTU723	0	0	0	0	0	0	0	0	0	0	0	0	0	0	0	0	0	0	0	0	0	0	20	0	1	0	0	0	Fungi	Chytridiomycota	Rhizophlyctidomycetes	Rhizophlyctidales	Rhizophlyctidaceae	Rhizophlyctis	rosea
OTU724	0	0	0	0	0	0	0	0	0	0	0	0	0	0	0	0	0	0	0	0	0	0	0	0	0	5	0	14	Fungi	Ascomycota	Eurotiomycetes	Chaetothyriales	Herpotrichiellaceae	Heteroconium	NA
OTU725	0	0	0	0	0	0	0	0	0	0	0	0	0	0	0	0	0	0	0	0	0	0	0	0	0	0	19	0	Fungi	Ascomycota	Sordariomycetes	Sordariales	NA	NA	NA
OTU727	0	0	0	2	0	0	2	0	0	0	0	0	0	0	14	0	0	0	0	0	0	0	0	0	0	0	0	0	Fungi	Ascomycota	Dothideomycetes	Dothideales	Dothioraceae	Hormonema	macrosporum
OTU729	0	0	0	0	0	0	8	10	0	0	0	0	0	0	0	0	0	0	0	0	0	0	0	0	0	0	0	0	Fungi	Basidiomycota	Tremellomycetes	Tremellales	Bulleribasidiaceae	Vishniacozyma	dimennae
OTU734	0	0	0	0	0	0	0	0	0	0	0	0	0	0	0	0	0	0	0	0	11	0	7	0	0	0	0	0	Fungi	Chytridiomycota	NA	NA	NA	NA	NA
OTU740	0	0	0	0	0	0	0	0	0	0	0	0	0	0	0	0	0	0	0	0	0	0	0	0	0	18	0	0	Fungi	Ascomycota	Sordariomycetes	Hypocreales	NA	NA	NA
OTU741	0	0	1	0	0	0	0	0	0	0	0	0	0	0	0	0	0	0	0	0	0	0	0	0	0	0	18	0	Fungi	Ascomycota	Eurotiomycetes	Eurotiales	Trichocomaceae	Talaromyces	NA
OTU743	0	0	0	0	0	0	0	0	0	0	0	0	0	0	0	0	0	0	0	0	0	0	0	0	0	0	0	19	Fungi	Ascomycota	Dothideomycetes	Pleosporales	Cucurbitariaceae	Pyrenochaeta	keratinophila
OTU750	0	0	0	0	1	0	0	0	0	0	0	0	0	0	0	0	0	0	0	0	19	0	0	0	0	0	0	0	Fungi	Ascomycota	Dothideomycetes	Pleosporales	Lindgomycetaceae	Clohesyomyces	NA
OTU757	0	0	0	0	0	0	0	0	0	0	0	0	0	0	0	0	0	0	0	0	0	0	0	0	0	0	0	17	Fungi	Basidiomycota	Agaricomycetes	Polyporales	Steccherinaceae	Steccherinum	ochraceum
OTU759	0	0	0	8	3	0	0	5	0	0	0	0	0	0	0	0	0	0	0	0	0	0	0	0	0	0	0	0	Fungi	Ascomycota	Leotiomycetes	Helotiales	Helotiales_fam_Incertae_sedis	Cadophora	NA
OTU766	0	0	1	0	0	0	0	1	0	0	0	0	0	0	0	21	0	0	0	0	0	0	0	0	0	0	16	0	Fungi	Ascomycota	Leotiomycetes	Helotiales	Helotiaceae	Crocicreas	pallidum
OTU769	0	0	0	0	0	0	0	0	0	0	0	0	0	0	0	0	0	0	0	0	15	0	0	0	0	0	0	0	Fungi	Ascomycota	Dothideomycetes	Venturiales	Sympoventuriaceae	Pseudosigmoidea	ibarakiensis
OTU772	0	0	0	0	0	0	0	0	0	0	0	0	0	0	0	0	0	0	0	0	0	0	0	0	16	0	0	0	Fungi	Basidiomycota	Agaricomycetes	Russulales	Stereaceae	Stereum	ostrea
OTU773	0	0	0	0	0	0	0	0	0	0	0	0	0	0	0	0	0	0	0	0	0	0	0	0	0	16	0	0	Fungi	Ascomycota	Sordariomycetes	Glomerellales	Plectosphaerellaceae	Verticillium	biguttatum
OTU774	0	0	0	0	0	0	0	0	0	0	0	0	0	0	0	0	0	0	0	0	0	0	0	0	0	3	3	10	Fungi	Basidiomycota	Agaricomycetes	Agaricales	Tricholomataceae	Clitocybe	nebularis
OTU777	0	0	0	0	0	0	0	0	0	0	0	0	0	0	0	0	0	0	0	0	0	0	0	0	0	0	16	0	Fungi	Ascomycota	Eurotiomycetes	Onygenales	Arachnomycetaceae	Arachnomyces	gracilis
OTU778	0	0	0	0	0	0	0	0	0	0	0	0	0	0	0	0	0	0	0	0	0	0	0	0	0	0	0	17	Fungi	Ascomycota	Sordariomycetes	Hypocreales	Hypocreaceae	Trichoderma	NA
OTU779	0	15	0	0	0	0	0	0	0	0	0	0	0	0	0	0	0	0	0	0	0	0	0	0	0	0	0	0	Fungi	Ascomycota	Dothideomycetes	Pleosporales	Pleosporaceae	Alternaria	NA
OTU780	1	2	8	3	9	0	0	8	1	0	0	0	0	0	0	0	0	0	0	0	0	0	0	0	0	0	0	0	Fungi	Ascomycota	Sordariomycetes	Hypocreales	Nectriaceae	Fusicolla	aquaeductuum
OTU787	0	0	0	0	0	0	0	0	0	0	0	0	0	0	0	0	0	0	0	15	0	0	0	0	0	0	0	0	Fungi	Basidiomycota	Agaricomycetes	Russulales	Peniophoraceae	Peniophora	cinerea
OTU790	0	0	0	0	0	0	0	0	0	0	0	0	0	0	0	0	0	0	0	15	0	0	0	0	1	0	0	0	Fungi	Basidiomycota	Agaricomycetes	Cantharellales	Cantharellales_fam_Incertae_sedis	Sistotrema	oblongisporum
OTU792	0	0	0	0	0	0	0	0	0	0	0	0	0	0	0	0	0	0	0	0	0	3	0	0	0	0	0	12	Fungi	Basidiomycota	Agaricomycetes	Hymenochaetales	Hymenochaetales_fam_Incertae_sedis	Trichaptum	abietinum
OTU793	0	0	1	0	0	0	0	0	0	0	0	0	0	0	0	0	0	0	0	0	0	0	15	0	0	0	0	0	Fungi	Mortierellomycota	Mortierellomycetes	Mortierellales	Mortierellaceae	Mortierella	alpina
OTU794	0	0	0	0	0	0	0	0	0	0	0	0	0	0	0	0	0	0	0	0	0	0	0	15	0	0	0	0	Fungi	Ascomycota	Sordariomycetes	Hypocreales	Hypocreaceae	Trichoderma	aerugineum
OTU795	0	0	0	0	0	0	0	0	0	0	0	0	0	0	0	0	0	0	0	0	0	0	0	0	15	0	0	0	Fungi	Ascomycota	Dothideomycetes	Venturiales	Sympoventuriaceae	Ochroconis	NA
OTU797	0	13	0	0	0	0	0	0	0	0	0	0	0	0	0	0	0	0	0	0	0	0	0	0	0	0	0	0	Fungi	Basidiomycota	Tremellomycetes	Cystofilobasidiales	Mrakiaceae	Tausonia	pullulans
OTU798	0	14	0	0	0	0	0	0	1	0	0	0	0	0	0	0	0	0	0	0	0	0	0	0	0	0	0	0	Fungi	Ascomycota	Eurotiomycetes	Chaetothyriales	Herpotrichiellaceae	Coniosporium	NA
OTU800	0	0	1	0	5	0	0	8	0	0	0	0	0	0	0	0	0	0	0	0	0	0	0	0	0	0	0	0	Fungi	Ascomycota	Dothideomycetes	Pleosporales	Pleosporaceae	Curvularia	NA
OTU801	1	0	0	6	0	0	0	0	0	0	2	8	0	0	0	0	0	0	0	0	0	0	0	0	0	0	0	0	Fungi	Ascomycota	Leotiomycetes	Helotiales	Helotiales_fam_Incertae_sedis	Hyalodendriella	betulae
OTU803	0	0	0	14	0	0	0	1	0	0	0	0	0	0	0	0	0	0	0	0	0	0	0	0	0	0	0	0	Fungi	Basidiomycota	Cystobasidiomycetes	Cystobasidiales	Cystobasidiaceae	Cystobasidium	pinicola
OTU804	0	0	5	0	14	0	0	1	1	0	0	0	0	0	0	0	0	0	0	0	0	0	0	0	0	0	0	0	Fungi	Basidiomycota	Tremellomycetes	Tremellales	Bulleribasidiaceae	Dioszegia	fristingensis
OTU811	0	0	0	0	0	0	0	0	0	0	0	0	0	0	0	0	0	0	0	0	14	0	0	0	0	0	0	0	Fungi	Ascomycota	Leotiomycetes	Helotiales	Helotiales_fam_Incertae_sedis	Leohumicola	NA
OTU815	0	0	0	0	0	0	0	0	0	0	0	0	0	0	0	0	0	0	0	0	0	0	14	0	0	0	0	0	Fungi	Ascomycota	Dothideomycetes	Pleosporales	Phaeosphaeriaceae	Paraphoma	chlamydocopiosa
OTU817	0	0	0	0	0	0	0	0	0	0	0	0	0	0	0	0	0	0	0	0	0	0	0	0	14	0	0	0	Fungi	Ascomycota	Sordariomycetes	Sordariales	Lasiosphaeriaceae	Schizothecium	NA
OTU818	0	0	0	1	0	0	0	0	0	0	0	0	0	0	0	0	0	0	0	0	0	0	0	0	3	0	0	11	Fungi	Basidiomycota	Agaricomycetes	Hymenochaetales	Schizoporaceae	Hyphodontia	pallidula
OTU820	0	0	0	0	0	0	0	0	0	0	0	0	0	0	0	0	0	0	0	0	0	0	0	0	0	0	14	0	Fungi	Ascomycota	Sordariomycetes	Hypocreales	NA	NA	NA
OTU821	0	0	0	0	0	0	0	0	0	0	0	0	0	0	0	0	0	0	0	0	0	0	0	0	0	0	0	20	Fungi	Ascomycota	Sordariomycetes	Sordariales	Lasiosphaeriaceae	Schizothecium	NA
OTU823	1	0	2	7	0	0	2	0	0	0	0	3	0	0	3	0	0	0	0	0	0	0	0	0	0	0	0	0	Fungi	Ascomycota	Eurotiomycetes	Eurotiales	Aspergillaceae	Aspergillus	NA
OTU824	0	13	0	0	0	0	0	0	0	0	0	0	0	0	0	0	0	0	0	0	0	0	0	0	0	0	0	0	Fungi	Ascomycota	Sordariomycetes	Xylariales	Bartaliniaceae	Truncatella	angustata
OTU825	0	6	5	1	0	0	2	1	0	0	0	0	0	0	0	0	0	0	0	0	0	0	0	0	0	0	0	0	Fungi	Ascomycota	Dothideomycetes	Pleosporales	Lindgomycetaceae	NA	NA
OTU826	0	0	13	0	0	0	0	0	0	0	0	0	0	0	0	0	0	0	0	0	0	0	0	0	0	0	0	0	Fungi	Ascomycota	Dothideomycetes	Pleosporales	Didymellaceae	Didymella	NA
OTU828	0	0	0	0	0	0	0	18	0	0	0	0	0	0	0	0	0	0	0	0	0	0	0	0	0	0	0	0	Fungi	Ascomycota	Dothideomycetes	Pleosporales	Leptosphaeriaceae	Leptosphaeria	NA
OTU834	0	0	0	0	0	0	0	0	0	0	0	0	0	0	0	0	0	0	0	0	13	0	0	0	0	0	0	0	Fungi	Ascomycota	Sordariomycetes	Sordariales	Lasiosphaeriaceae	Podospora	decidua
OTU837	0	0	0	0	0	0	0	0	0	0	0	0	0	0	0	0	0	0	0	0	13	0	0	0	0	0	0	0	Fungi	Ascomycota	Sordariomycetes	Hypocreales	Nectriaceae	Fusarium	algeriense
OTU839	0	0	1	0	0	0	0	1	0	0	0	0	0	0	0	0	0	0	0	0	0	0	13	0	0	0	0	0	Fungi	Basidiomycota	Agaricostilbomycetes	Agaricostilbales	Kondoaceae	Bensingtonia	NA
OTU841	0	0	0	0	0	0	0	0	0	0	0	0	0	0	0	0	0	0	0	0	0	0	0	13	0	0	0	0	Fungi	Ascomycota	Sordariomycetes	Hypocreales	Clavicipitaceae	Metarhizium	marquandii
OTU843	0	0	0	0	0	0	0	0	0	0	0	0	0	0	0	0	0	0	0	0	0	0	0	0	0	0	13	0	Fungi	Ascomycota	Eurotiomycetes	Eurotiales	Aspergillaceae	Penicillium	NA
OTU846	0	12	0	0	0	0	0	0	0	0	0	0	0	0	0	0	0	0	0	0	0	0	0	0	0	0	0	0	Fungi	Ascomycota	Sordariomycetes	NA	NA	NA	NA
OTU847	0	0	0	11	0	0	0	0	0	0	0	0	0	0	0	0	0	0	0	0	0	0	0	0	0	0	0	0	Fungi	Ascomycota	Dothideomycetes	Pleosporales	Sporormiaceae	Preussia	tetramera
OTU850	0	0	0	0	0	1	0	0	0	0	0	0	0	0	0	0	0	0	0	0	0	0	0	0	0	0	0	0	Fungi	Ascomycota	Dothideomycetes	Pleosporales	Periconiaceae	Periconia	pseudodigitata
OTU856	0	0	0	0	0	0	0	0	0	0	0	0	0	0	0	0	0	0	0	0	11	0	0	0	0	0	0	0	Fungi	Ascomycota	Sordariomycetes	Hypocreales	Hypocreaceae	Trichoderma	reesei
OTU857	0	0	0	0	0	0	0	0	0	0	0	0	0	0	0	0	0	0	0	0	0	12	0	0	0	0	0	0	Fungi	Ascomycota	Leotiomycetes	Helotiales	NA	NA	NA
OTU860	0	0	0	0	0	0	0	0	0	0	0	0	0	0	0	0	0	0	0	0	0	0	0	13	0	0	0	0	Fungi	Basidiomycota	Agaricomycetes	Polyporales	Meruliaceae	Mycoacia	uda
OTU861	0	0	0	0	0	0	0	0	0	0	0	0	0	0	0	0	0	0	0	0	0	0	0	0	12	0	0	0	Fungi	Ascomycota	Dothideomycetes	Microthyriales	NA	NA	NA
OTU862	0	0	0	5	0	0	0	0	0	0	0	0	0	0	0	0	0	0	0	0	0	0	0	0	12	2	0	0	Fungi	Ascomycota	Sordariomycetes	Ophiostomatales	Ophiostomataceae	Sporothrix	brunneoviolacea
OTU865	0	0	2	2	11	0	0	1	1	0	0	0	0	0	0	0	0	0	0	0	0	0	0	0	0	0	0	0	Fungi	Basidiomycota	Tremellomycetes	Tremellales	Bulleribasidiaceae	Dioszegia	NA
OTU869	0	0	0	0	0	0	0	0	0	0	0	0	0	0	11	0	0	0	0	0	0	0	0	0	0	0	0	0	Fungi	Ascomycota	Lecanoromycetes	Lecanorales	Parmeliaceae	Hypogymnia	tubulosa
OTU873	0	0	0	0	0	0	0	0	0	0	0	0	0	0	0	0	0	0	0	0	11	0	0	0	0	0	0	0	Fungi	Basidiomycota	Agaricomycetes	Hymenochaetales	Schizoporaceae	Xylodon	crustosus
OTU875	0	0	0	0	0	0	0	0	0	0	0	0	0	0	0	0	0	0	0	0	0	11	0	0	0	0	0	0	Fungi	Basidiomycota	Agaricomycetes	Agaricales	Agaricaceae	Lepiota	NA
OTU877	0	0	0	0	0	0	0	0	0	0	0	0	0	0	0	0	0	0	0	0	0	0	11	0	0	0	0	0	Fungi	Chytridiomycota	Lobulomycetes	NA	NA	NA	NA
OTU878	0	0	0	0	0	0	0	0	0	0	0	0	0	0	0	0	0	0	0	0	0	0	11	0	0	0	0	0	Fungi	Basidiomycota	Agaricomycetes	Agaricales	Typhulaceae	Typhula	sclerotioides
OTU881	0	0	0	0	0	0	0	0	0	0	0	0	0	0	0	0	0	0	0	0	0	0	0	0	0	11	0	0	Fungi	Ascomycota	Dothideomycetes	Pleosporales	Phaeosphaeriaceae	Phaeosphaeria	NA
OTU882	0	0	0	0	0	0	0	0	0	0	0	0	0	0	0	0	0	0	0	0	0	0	0	0	0	11	0	0	Fungi	Basidiomycota	Agaricomycetes	Hymenochaetales	Schizoporaceae	Xylodon	erastii
OTU883	0	0	0	0	0	0	0	0	0	0	0	0	0	0	0	0	0	0	0	0	0	0	0	0	0	0	0	11	Fungi	Basidiomycota	Agaricomycetes	Cantharellales	Ceratobasidiaceae	Thanatephorus	cucumeris
OTU884	0	0	0	0	0	0	0	0	0	0	0	0	0	0	0	0	0	0	0	0	0	0	0	0	0	0	0	11	Fungi	Ascomycota	Dothideomycetes	Pleosporales	Lentitheciaceae	Darksidea	NA
OTU885	0	0	0	0	0	0	0	0	0	0	0	0	0	0	0	0	0	0	0	0	0	0	0	0	0	0	0	11	Fungi	Basidiomycota	Agaricomycetes	Hymenochaetales	Schizoporaceae	Alutaceodontia	alutacea
OTU889	0	0	0	0	10	0	0	0	0	0	0	0	0	0	0	0	0	0	0	0	0	0	0	0	0	0	0	0	Fungi	Basidiomycota	Agaricomycetes	Agaricales	Typhulaceae	Typhula	ishikariensis
OTU890	0	0	0	2	0	0	0	8	0	0	0	0	0	0	0	0	0	0	0	0	0	0	0	0	0	0	0	0	Fungi	Basidiomycota	Tremellomycetes	Tremellales	Bulleribasidiaceae	Dioszegia	rishiriensis
OTU895	0	0	0	0	0	0	0	0	0	0	0	0	0	0	0	0	0	0	0	10	0	0	0	0	0	0	0	0	Fungi	Basidiomycota	Agaricomycetes	Agaricales	Tricholomataceae	Tricholoma	albobrunneum
OTU896	0	0	0	0	0	0	0	0	0	0	0	0	0	0	0	0	0	0	0	0	0	10	0	0	0	0	0	0	Fungi	Ascomycota	Pezizomycotina_cls_Incertae_sedis	Pezizomycotina_ord_Incertae_sedis	Pezizomycotina_fam_Incertae_sedis	Isthmolongispora	NA
OTU897	0	0	0	0	0	0	0	0	0	0	0	0	0	0	0	0	0	0	0	0	0	0	11	0	0	0	0	0	Fungi	Basidiomycota	Agaricomycetes	Cantharellales	Ceratobasidiaceae	Thanatephorus	cucumeris
OTU898	0	0	0	0	0	0	0	0	0	0	0	0	0	0	0	0	0	0	0	0	0	0	0	10	0	0	0	0	Fungi	Basidiomycota	Agaricomycetes	Polyporales	Meruliaceae	Phlebia	radiata
OTU899	0	0	0	0	0	0	0	0	0	0	0	0	0	0	0	0	0	0	0	0	0	0	0	0	10	0	0	0	Fungi	Ascomycota	Dothideomycetes	Venturiales	Sympoventuriaceae	Ochroconis	NA
OTU900	0	0	0	0	0	0	0	0	0	0	0	0	0	0	0	0	0	0	0	0	0	0	0	0	11	0	0	0	Fungi	Ascomycota	Sordariomycetes	Myrmecridiales	Myrmecridiaceae	Myrmecridium	hiemale
OTU901	0	0	1	0	1	0	1	0	1	0	0	0	0	0	0	0	0	0	0	0	0	0	0	1	1	10	0	0	Fungi	Ascomycota	Sordariomycetes	NA	NA	NA	NA
OTU902	0	0	0	0	0	0	0	0	0	0	0	0	0	0	0	0	0	0	0	0	0	0	0	0	0	10	0	0	Fungi	Basidiomycota	Wallemiomycetes	Wallemiales	Wallemiaceae	Wallemia	canadensis
OTU903	0	0	0	0	0	0	0	0	0	1	0	0	0	1	0	0	0	0	0	0	17	0	6	0	3	11	8	63	Fungi	Basidiomycota	Malasseziomycetes	Malasseziales	Malasseziaceae	Malassezia	globosa
OTU904	0	0	0	0	0	0	0	0	0	0	0	0	0	0	0	0	0	0	0	0	0	0	0	0	0	10	0	0	Fungi	Ascomycota	Sordariomycetes	Sordariales	Lasiosphaeriaceae	NA	NA
OTU905	0	0	0	0	0	0	0	0	0	0	0	0	0	0	0	0	0	0	0	0	0	0	0	0	0	0	10	0	Fungi	Ascomycota	Sordariomycetes	Hypocreales	NA	NA	NA
OTU906	0	0	0	0	0	0	0	0	0	0	0	0	0	0	0	0	0	0	0	0	0	0	0	0	0	0	0	10	Fungi	Ascomycota	Sordariomycetes	Hypocreales	Cordycipitaceae	Lecanicillium	psalliotae
OTU907	0	0	0	0	0	0	0	0	0	0	0	0	0	0	0	0	0	0	0	0	0	0	0	0	0	0	0	10	Fungi	Basidiomycota	Agaricomycetes	Thelephorales	Thelephoraceae	Tomentellopsis	NA
OTU908	0	0	0	0	0	0	0	0	0	0	0	0	0	0	0	0	0	0	0	0	0	0	0	0	0	0	0	10	Fungi	Basidiomycota	Agaricomycetes	Hymenochaetales	Schizoporaceae	Xylodon	sambuci
OTU909	0	0	0	0	0	0	0	0	0	0	0	0	0	0	0	0	0	0	0	0	0	0	0	0	0	0	0	10	Fungi	Ascomycota	Eurotiomycetes	Eurotiales	Trichocomaceae	Talaromyces	minioluteus
OTU912	0	4	0	9	3	0	0	0	0	0	0	0	0	0	0	0	0	0	0	0	0	0	0	0	0	0	0	0	Fungi	Ascomycota	Sordariomycetes	Microascales	Microascaceae	Kernia	NA
OTU913	0	0	0	9	0	0	0	1	0	0	0	0	0	0	0	0	0	0	0	0	0	0	0	0	0	0	0	0	Fungi	Ascomycota	Dothideomycetes	Pleosporales	Leptosphaeriaceae	Leptosphaeria	cirsii
OTU914	0	0	0	0	9	0	0	0	0	0	0	0	0	0	0	0	0	0	0	0	0	0	0	0	0	0	0	0	Fungi	Ascomycota	Sordariomycetes	Trichosphaeriales	Trichosphaeriaceae	Nigrospora	bambusae
OTU915	0	0	0	0	9	0	0	1	0	0	0	0	0	0	0	0	0	0	0	0	0	0	0	0	0	0	0	0	Fungi	Basidiomycota	Tremellomycetes	Tremellales	NA	NA	NA
OTU916	0	0	0	0	10	0	0	0	0	0	0	0	0	0	0	0	0	0	0	0	0	0	0	0	0	0	0	0	Fungi	Basidiomycota	Tremellomycetes	Tremellales	Bulleribasidiaceae	Dioszegia	changbaiensis
OTU917	0	0	0	0	9	0	0	0	0	0	0	0	0	0	0	0	0	0	0	0	0	0	0	0	0	0	0	0	Fungi	Mucoromycota	Mucoromycetes	Mucorales	Mucoraceae	Mucor	strictus
OTU919	0	6	0	0	0	0	3	9	0	0	0	0	0	0	0	0	0	0	0	0	0	0	0	0	0	0	0	0	Fungi	Ascomycota	Dothideomycetes	Pleosporales	Didymellaceae	Didymella	NA
OTU921	0	0	0	0	0	0	0	0	0	0	0	0	9	0	0	0	0	0	0	0	0	0	0	0	0	0	0	0	Fungi	Mucoromycota	Mucoromycetes	Mucorales	Mucoraceae	Actinomucor	elegans
OTU922	0	0	0	0	0	0	0	0	0	0	0	0	0	0	0	0	0	0	0	0	0	0	0	3	3	0	0	0	Fungi	Basidiomycota	Agaricomycetes	Hymenochaetales	Schizoporaceae	Schizopora	paradoxa
OTU928	0	0	0	0	0	0	0	0	0	0	0	0	0	0	0	0	0	0	0	10	0	0	0	0	0	0	0	0	Fungi	Basidiomycota	Agaricomycetes	Cantharellales	Cantharellales_fam_Incertae_sedis	Sistotrema	NA
OTU930	0	0	0	0	0	0	0	0	0	0	0	0	0	0	0	0	0	0	0	0	9	0	0	0	0	0	0	0	Fungi	Ascomycota	Dothideomycetes	Pleosporales	Melanommataceae	NA	NA
OTU932	0	0	0	0	0	0	0	0	0	0	0	0	0	0	0	0	0	0	0	0	0	9	0	0	0	0	0	0	Fungi	Ascomycota	Sordariomycetes	Hypocreales	Nectriaceae	Cosmospora	viridescens
OTU933	0	0	0	0	0	0	0	0	0	0	0	0	0	0	0	0	0	0	0	0	0	8	0	0	0	0	0	0	Fungi	Ascomycota	Eurotiomycetes	Eurotiales	Trichocomaceae	Talaromyces	NA
OTU934	0	0	0	0	0	0	0	0	0	0	0	0	0	0	0	0	0	0	0	0	0	9	0	0	0	0	0	0	Fungi	Ascomycota	Saccharomycetes	Saccharomycetales	Lipomycetaceae	Lipomyces	lipofer
OTU935	0	0	0	0	0	0	0	0	0	0	0	0	0	0	0	0	0	0	0	0	0	0	9	0	0	0	0	0	Fungi	Basidiomycota	Agaricomycetes	Polyporales	Meruliaceae	Phlebia	tuberculata
OTU936	0	0	0	0	0	0	0	0	0	0	0	0	0	0	0	0	0	0	0	0	0	0	10	0	3	0	0	0	Fungi	Basidiomycota	Agaricomycetes	Auriculariales	Auriculariales_fam_Incertae_sedis	Oliveonia	pauxilla
OTU937	0	0	0	0	0	0	0	0	0	0	0	0	0	0	0	0	0	0	0	0	0	0	9	0	0	0	0	0	Fungi	Ascomycota	Eurotiomycetes	Eurotiales	Aspergillaceae	Aspergillus	aureolatus
OTU938	0	0	0	0	0	0	0	0	0	0	0	0	0	0	0	0	0	0	0	0	0	0	9	0	0	0	0	0	Fungi	Ascomycota	Dothideomycetes	Pleosporales	Phaeosphaeriaceae	NA	NA
OTU939	0	0	0	0	0	0	0	0	0	0	0	0	0	0	0	0	0	0	0	0	0	0	0	9	0	0	0	0	Fungi	Ascomycota	Sordariomycetes	Hypocreales	Hypocreales_fam_Incertae_sedis	Acremonium	blochii
OTU940	0	0	0	0	0	0	0	0	0	0	0	0	0	0	0	0	0	0	0	0	0	0	0	0	9	0	0	0	Fungi	Basidiomycota	Agaricostilbomycetes	Agaricostilbales	Kondoaceae	Kondoa	NA
OTU941	0	3	0	0	0	0	0	0	0	0	0	0	0	0	0	0	0	0	0	0	0	0	0	0	0	8	0	0	Fungi	Basidiomycota	Tremellomycetes	Tremellales	Bulleribasidiaceae	Vishniacozyma	dimennae
OTU944	0	8	0	0	0	0	0	0	0	0	0	0	0	0	0	0	0	0	0	0	0	0	0	0	0	0	0	0	Fungi	Ascomycota	Dothideomycetes	Pleosporales	Torulaceae	Torula	NA
OTU946	0	4	0	2	2	0	0	0	0	0	0	0	0	0	0	0	0	0	0	0	0	0	0	0	0	0	0	0	Fungi	Ascomycota	Dothideomycetes	Pleosporales	Phaeosphaeriaceae	Phaeosphaeria	NA
OTU948	0	0	0	8	0	0	0	3	0	0	0	0	0	0	0	0	0	0	0	0	0	0	0	0	0	0	0	0	Fungi	Ascomycota	Dothideomycetes	Pleosporales	Leptosphaeriaceae	Leptosphaeria	cirsii
OTU949	0	0	0	8	0	0	0	0	0	0	0	0	0	0	0	0	0	0	0	0	0	0	0	0	0	0	0	0	Fungi	Ascomycota	Leotiomycetes	Helotiales	NA	NA	NA
OTU950	0	0	3	0	8	0	0	0	0	0	0	0	0	0	0	0	0	0	0	0	0	0	0	0	0	0	0	0	Fungi	Ascomycota	Leotiomycetes	Helotiales	Helotiaceae	Hymenoscyphus	caudatus
OTU952	0	0	1	0	0	0	0	11	0	0	0	0	0	0	0	0	0	0	0	0	0	0	0	0	0	0	0	0	Fungi	Ascomycota	Dothideomycetes	Pleosporales	Leptosphaeriaceae	Leptosphaeria	cirsii
OTU953	1	0	0	0	1	0	1	1	8	0	0	0	0	0	0	0	0	0	0	0	0	0	0	0	0	0	0	0	Fungi	Ascomycota	NA	NA	NA	NA	NA
OTU954	0	0	0	0	0	0	0	0	0	8	0	0	0	0	0	0	0	0	0	0	0	0	0	0	0	0	0	0	Fungi	Ascomycota	Sordariomycetes	Hypocreales	Hypocreales_fam_Incertae_sedis	Olpitrichum	sphaerosporum
OTU958	0	0	0	0	0	0	0	0	0	0	0	0	0	0	0	0	0	0	0	8	1	0	0	0	0	0	0	0	Fungi	Ascomycota	Sordariomycetes	Hypocreales	NA	NA	NA
OTU960	0	0	2	0	0	0	0	0	0	0	0	0	0	0	0	0	0	0	0	0	0	8	0	1	0	0	0	0	Fungi	Ascomycota	Sordariomycetes	Chaetosphaeriales	Chaetosphaeriaceae	Chloridium	aseptatum
OTU962	0	0	0	0	0	0	1	0	0	0	0	0	0	0	0	0	0	0	0	0	0	8	0	0	0	0	0	4	Fungi	Ascomycota	Eurotiomycetes	Eurotiales	Aspergillaceae	Penicillium	NA
OTU963	0	0	0	0	0	0	0	0	0	0	0	0	0	0	0	0	0	0	0	0	0	0	8	0	0	7	0	0	Fungi	Ascomycota	Dothideomycetes	Venturiales	Sympoventuriaceae	Ochroconis	NA
OTU967	0	0	0	0	0	0	0	0	0	0	0	0	0	0	0	0	0	0	0	0	0	0	0	0	0	8	0	0	Fungi	Ascomycota	Sordariomycetes	Sordariales	Lasiosphaeriaceae	Schizothecium	curvisporum
OTU968	0	0	0	0	0	0	0	0	0	0	0	0	0	0	0	0	0	0	0	0	0	1	0	0	2	8	7	13	Fungi	Basidiomycota	Agaricostilbomycetes	Agaricostilbales	Chionosphaeraceae	Kurtzmanomyces	NA
OTU969	0	0	0	0	0	0	0	0	0	0	0	0	0	0	0	0	0	0	0	1	0	0	0	0	0	0	8	0	Fungi	Basidiomycota	Agaricomycetes	Agaricales	Strophariaceae	Hypholoma	fasciculare
OTU970	0	0	0	0	0	0	0	0	0	0	0	0	0	0	0	0	0	0	0	0	0	0	0	0	0	0	0	8	Fungi	Ascomycota	Dothideomycetes	Botryosphaeriales	Botryosphaeriaceae	Lasiodiplodia	NA
OTU972	0	0	0	0	0	0	0	0	0	0	0	0	0	0	0	0	0	0	0	0	0	0	0	0	0	0	0	8	Fungi	Ascomycota	Dothideomycetes	Capnodiales	Cladosporiaceae	Cladosporium	ossifragi
OTU973	0	0	0	0	0	0	0	0	0	0	0	0	0	0	0	0	0	0	5	0	0	0	0	0	0	0	0	8	Fungi	Basidiomycota	Malasseziomycetes	Malasseziales	Malasseziaceae	Malassezia	arunalokei
OTU974	0	7	0	0	0	0	0	0	0	0	0	0	0	0	0	0	0	0	0	0	0	0	0	0	0	0	0	0	Fungi	Ascomycota	Dothideomycetes	Capnodiales	Teratosphaeriaceae	Constantinomyces	nebulosus
OTU978	0	0	0	6	0	0	0	0	0	0	0	0	0	0	0	0	0	0	0	0	0	0	0	0	0	0	0	0	Fungi	Basidiomycota	Cystobasidiomycetes	Cystobasidiales	Cystobasidiaceae	Cystobasidium	ritchiei
OTU979	0	0	0	1	7	0	0	2	0	0	0	0	0	0	0	0	0	0	0	0	0	0	0	0	0	0	0	0	Fungi	Ascomycota	Dothideomycetes	Venturiales	Sympoventuriaceae	Ochroconis	NA
OTU980	0	1	0	0	7	0	1	2	0	0	0	0	0	0	0	0	0	0	0	0	0	0	0	0	0	0	0	0	Fungi	Basidiomycota	Tremellomycetes	Tremellales	Bulleribasidiaceae	Dioszegia	rishiriensis
OTU981	0	0	0	0	7	0	0	0	0	0	0	0	0	0	0	0	0	0	0	0	0	0	0	0	0	0	0	0	Fungi	Basidiomycota	Tremellomycetes	Tremellales	Bulleribasidiaceae	Vishniacozyma	globispora
OTU983	0	0	0	0	0	0	0	6	0	0	0	0	0	0	0	0	0	0	0	0	0	0	0	0	0	0	0	0	Fungi	Ascomycota	Dothideomycetes	Pleosporales	Leptosphaeriaceae	Leptosphaeria	cirsii
OTU984	0	0	0	2	0	0	0	9	0	0	0	0	0	0	0	0	0	0	0	0	0	0	0	0	0	0	0	0	Fungi	Ascomycota	Dothideomycetes	Pleosporales	Leptosphaeriaceae	Leptosphaeria	cirsii
OTU985	0	1	0	6	1	0	0	14	0	0	0	0	0	0	0	0	0	0	0	0	0	0	0	0	0	0	0	0	Fungi	Ascomycota	Dothideomycetes	Pleosporales	Leptosphaeriaceae	Leptosphaeria	NA
OTU987	0	0	0	0	1	0	0	0	0	0	7	0	0	0	0	0	0	0	0	0	0	0	0	0	0	1	0	0	Fungi	Mortierellomycota	Mortierellomycetes	Mortierellales	Mortierellaceae	Mortierella	NA
OTU990	0	0	0	1	0	0	0	0	0	0	0	0	0	0	0	5	0	0	0	0	0	2	0	0	0	0	0	0	Fungi	Basidiomycota	Agaricomycetes	Russulales	Bondarzewiaceae	Heterobasidion	NA
OTU991	0	3	0	0	0	0	0	0	0	0	0	0	0	0	0	0	7	0	0	0	0	0	0	0	0	0	0	0	Fungi	Ascomycota	Eurotiomycetes	Chaetothyriales	Epibryaceae	Epibryon	interlamellare
OTU992	0	0	0	0	0	0	0	0	0	0	0	0	0	0	0	0	0	0	7	0	0	0	0	0	0	0	0	0	Fungi	Ascomycota	Sordariomycetes	Coniochaetales	Coniochaetaceae	Coniochaeta	NA
OTU994	0	0	0	0	0	0	0	0	0	0	0	0	0	0	0	0	0	0	0	0	7	0	0	0	0	0	0	0	Fungi	Ascomycota	Pezizomycotina_cls_Incertae_sedis	Pezizomycotina_ord_Incertae_sedis	Pezizomycotina_fam_Incertae_sedis	Hymenula	cerealis
OTU997	0	0	0	0	0	0	0	0	0	0	0	0	0	0	0	0	0	0	0	0	0	2	0	6	0	0	0	0	Fungi	Ascomycota	Leotiomycetes	Helotiales	NA	NA	NA
OTU999	0	0	0	0	0	0	0	0	0	0	0	0	0	0	0	0	0	0	0	0	0	8	7	1	0	0	0	0	Fungi	Ascomycota	Eurotiomycetes	Eurotiales	Aspergillaceae	Penicillium	simplicissimum
OTU1001	0	0	0	0	0	0	0	0	0	0	0	0	0	0	0	0	0	0	0	0	0	0	7	0	0	0	0	0	Fungi	Basidiomycota	Agaricomycetes	Agaricales	Tricholomataceae	Mycena	polygramma
OTU1003	0	0	0	0	0	0	0	0	0	0	0	0	0	0	0	0	0	0	0	0	0	0	0	7	0	0	0	0	Fungi	Ascomycota	Sordariomycetes	Sordariales	Lasiosphaeriaceae	NA	NA
OTU1004	0	0	0	0	0	0	0	0	0	0	0	0	0	0	0	0	0	0	0	0	0	0	0	1	3	0	0	3	Fungi	Ascomycota	Dothideomycetes	Pleosporales	Phaeosphaeriaceae	Ophiosphaerella	NA
OTU1005	0	0	0	1	0	0	0	0	0	0	0	0	0	0	0	0	0	0	0	0	0	0	0	0	7	0	0	0	Fungi	Basidiomycota	Tremellomycetes	Cystofilobasidiales	Mrakiaceae	Udeniomyces	pyricola
OTU1007	0	0	0	0	0	0	0	0	0	0	0	0	0	0	0	0	0	0	0	0	0	0	0	0	7	0	0	0	Fungi	Basidiomycota	Microbotryomycetes	Microbotryomycetes_ord_Incertae_sedis	Chrysozymaceae	Udeniozyma	ferulica
OTU1009	0	2	0	0	0	0	0	0	0	0	0	0	0	0	0	0	0	0	0	0	0	0	0	0	0	7	0	0	Fungi	Basidiomycota	Agaricomycetes	Agaricales	NA	NA	NA
OTU1011	0	0	0	0	0	0	0	0	0	0	0	0	0	0	0	0	0	3	0	7	0	4	0	0	0	0	7	0	Fungi	Basidiomycota	Malasseziomycetes	Malasseziales	Malasseziaceae	Malassezia	arunalokei
OTU1012	0	0	0	0	0	0	0	0	0	0	0	0	0	0	0	0	0	0	0	0	0	0	0	0	0	0	0	7	Fungi	Basidiomycota	Malasseziomycetes	Malasseziales	Malasseziaceae	Malassezia	sympodialis
OTU1013	0	0	0	0	0	0	0	0	0	0	0	0	0	0	0	0	0	0	0	0	0	0	0	0	0	0	0	7	Fungi	Ascomycota	Dothideomycetes	Pleosporales	NA	NA	NA
OTU1022	0	0	3	3	0	0	0	0	0	0	0	0	0	0	0	0	0	0	0	0	0	0	0	0	0	0	0	0	Fungi	Ascomycota	Dothideomycetes	Pleosporales	Phaeosphaeriaceae	Dematiopleospora	fusiformis
OTU1023	0	0	6	0	0	0	0	0	0	0	0	0	0	0	0	0	0	0	0	0	0	0	0	0	0	0	0	0	Fungi	Chytridiomycota	Spizellomycetes	Spizellomycetales	Powellomycetaceae	Powellomyces	NA
OTU1024	0	0	0	6	0	0	0	0	0	0	0	0	0	0	0	0	0	0	0	0	0	0	0	0	0	0	0	0	Fungi	Ascomycota	Dothideomycetes	Myriangiales	Elsinoaceae	NA	NA
OTU1025	0	0	0	6	0	0	0	0	0	0	0	0	0	0	0	0	0	0	0	0	0	0	0	0	0	0	0	0	Fungi	Basidiomycota	Agaricomycetes	NA	NA	NA	NA
OTU1026	0	0	0	6	0	0	0	0	0	0	0	0	0	0	0	0	0	0	0	0	0	0	0	0	0	0	0	0	Fungi	Basidiomycota	Tremellomycetes	Filobasidiales	Filobasidiaceae	Naganishia	vaughanmartiniae
OTU1027	0	0	0	9	0	0	0	1	0	0	0	0	0	0	0	0	0	0	0	0	0	0	0	0	0	0	0	0	Fungi	Ascomycota	Dothideomycetes	Pleosporales	Leptosphaeriaceae	Leptosphaeria	cirsii
OTU1028	0	0	0	6	0	0	0	0	0	0	0	0	0	0	0	0	0	0	0	0	0	0	0	0	0	0	0	0	Fungi	Ascomycota	Dothideomycetes	Pleosporales	Phaeosphaeriaceae	Neosetophoma	rosae
OTU1029	0	0	0	6	0	0	0	0	0	0	0	0	0	0	0	0	0	0	0	0	0	0	0	0	0	0	0	0	Fungi	Ascomycota	Dothideomycetes	Pleosporales	Leptosphaeriaceae	Leptosphaeria	NA
OTU1030	0	0	0	0	3	0	0	3	0	0	0	0	0	0	0	0	0	0	0	0	0	0	0	0	0	0	0	0	Fungi	Ascomycota	Dothideomycetes	Pleosporales	Phaeosphaeriaceae	Dematiopleospora	rosicola
OTU1031	0	0	0	0	0	0	0	7	0	0	0	0	0	0	0	0	0	0	0	0	0	0	0	0	0	0	0	0	Fungi	Ascomycota	Dothideomycetes	Pleosporales	Leptosphaeriaceae	Leptosphaeria	cirsii
OTU1032	0	0	0	0	0	0	0	6	0	0	0	0	0	0	0	0	0	0	0	0	0	0	0	0	0	0	0	0	Fungi	Ascomycota	Dothideomycetes	Pleosporales	Leptosphaeriaceae	Leptosphaeria	cirsii
OTU1033	0	0	0	0	0	0	0	6	0	0	0	0	0	0	0	0	0	0	0	0	0	0	0	0	0	0	0	0	Fungi	Ascomycota	Sordariomycetes	Myrmecridiales	Myrmecridiaceae	Myrmecridium	phragmitis
OTU1034	0	0	1	0	0	0	0	6	0	0	0	0	0	0	0	0	0	0	0	0	0	0	0	0	0	0	0	0	Fungi	Basidiomycota	Agaricostilbomycetes	Agaricostilbales	Kondoaceae	Kondoa	changbaiensis
OTU1035	0	0	0	0	0	0	0	0	0	0	0	6	0	0	0	0	0	0	0	0	0	0	0	0	0	0	0	0	Fungi	Basidiomycota	Agaricomycetes	Polyporales	Meruliaceae	Scopuloides	hydnoides
OTU1037	0	0	0	0	0	0	0	0	0	0	0	0	6	0	0	0	0	0	0	0	0	0	0	0	0	0	0	0	Fungi	Ascomycota	Eurotiomycetes	Eurotiales	Aspergillaceae	Penicillium	NA
OTU1038	0	0	0	0	0	0	0	0	0	0	0	0	0	0	0	0	0	0	0	0	0	0	0	0	0	0	0	0	Fungi	Ascomycota	NA	NA	NA	NA	NA
OTU1040	0	0	0	0	0	0	0	0	1	0	0	0	0	0	0	6	0	0	0	0	0	0	0	0	0	0	0	0	Fungi	Ascomycota	Eurotiomycetes	Chaetothyriales	Cyphellophoraceae	Cyphellophora	sessilis
OTU1043	0	1	0	0	0	0	0	0	0	0	0	0	0	0	0	0	0	0	0	0	6	0	0	0	0	0	0	0	Fungi	Basidiomycota	Agaricomycetes	Agaricales	Omphalotaceae	Rhodocollybia	butyracea
OTU1045	0	0	0	0	0	0	0	0	0	0	0	0	0	0	0	0	0	0	0	0	0	6	0	0	0	0	0	0	Fungi	Ascomycota	Dothideomycetes	Tubeufiales	Tubeufiaceae	NA	NA
OTU1046	0	1	0	0	0	0	0	0	0	0	0	0	0	0	0	0	0	0	0	0	0	0	0	6	0	0	0	0	Fungi	Ascomycota	Sordariomycetes	Xylariales	Microdochiaceae	Microdochium	NA
OTU1047	0	0	0	0	0	0	0	0	0	0	0	0	0	0	0	0	0	0	0	0	0	0	0	6	0	0	0	0	Fungi	Ascomycota	Sordariomycetes	Hypocreales	Hypocreaceae	Trichoderma	NA
OTU1048	0	0	0	1	3	0	0	0	0	0	0	0	0	0	0	0	0	0	0	0	0	0	0	6	0	0	0	0	Fungi	Ascomycota	Dothideomycetes	Pleosporales	Phaeosphaeriaceae	Septoriella	hirta
OTU1049	0	0	0	0	0	0	0	0	0	0	0	0	0	0	0	0	0	0	0	0	0	0	0	5	0	0	0	0	Fungi	Ascomycota	Leotiomycetes	Thelebolales	Pseudeurotiaceae	Pseudogymnoascus	NA
OTU1050	0	0	0	0	0	0	0	0	0	0	0	0	0	0	0	0	0	0	0	0	0	0	0	0	6	0	0	0	Fungi	Basidiomycota	Agaricomycetes	Hymenochaetales	Schizoporaceae	Xylodon	nespori
OTU1052	0	0	0	0	0	0	0	0	0	0	0	0	0	0	0	0	0	0	0	0	0	0	0	0	0	5	0	0	Fungi	Ascomycota	Sordariomycetes	Myrmecridiales	Myrmecridiaceae	Myrmecridium	phragmitis
OTU1055	0	0	0	0	0	0	0	0	0	0	0	0	0	0	0	0	0	0	0	0	0	0	0	0	0	0	0	7	Fungi	Ascomycota	Saccharomycetes	Saccharomycetales	Debaryomycetaceae	Debaryomyces	hansenii
OTU1057	0	5	0	0	0	0	0	0	0	0	0	0	0	0	0	0	0	0	0	0	0	0	0	0	0	0	0	0	Fungi	Ascomycota	Dothideomycetes	Pleosporales	Phaeosphaeriaceae	Phaeosphaeria	NA
OTU1058	0	0	5	0	0	0	0	0	0	0	0	0	0	0	0	0	0	0	0	0	0	0	0	0	0	0	0	0	Fungi	Ascomycota	Dothideomycetes	Capnodiales	Capnodiales_fam_Incertae_sedis	Arthrocatena	NA
OTU1059	0	0	4	0	3	0	1	0	0	0	0	0	0	0	0	0	0	0	0	0	0	0	0	0	0	0	0	0	Fungi	Ascomycota	Dothideomycetes	Capnodiales	Extremaceae	NA	NA
OTU1061	0	0	5	4	1	1	0	0	0	0	0	0	0	0	0	0	0	0	0	0	0	0	0	0	0	0	0	0	Fungi	Ascomycota	Dothideomycetes	Pleosporales	Phaeosphaeriaceae	Neosetophoma	samararum
OTU1062	0	0	4	2	0	0	0	0	0	0	0	0	0	0	0	0	0	0	0	0	0	0	0	0	0	0	0	0	Fungi	Ascomycota	Dothideomycetes	Pleosporales	NA	NA	NA
OTU1063	0	0	5	0	0	0	0	0	0	0	0	0	0	0	0	0	0	0	0	0	0	0	0	0	0	0	0	0	Fungi	Basidiomycota	Agaricomycetes	NA	NA	NA	NA
OTU1064	0	0	0	5	0	0	0	5	0	0	0	0	0	0	0	0	0	0	0	0	0	0	0	0	0	0	0	0	Fungi	Ascomycota	Dothideomycetes	Pleosporales	Leptosphaeriaceae	Leptosphaeria	cirsii
OTU1069	0	0	0	0	5	0	0	0	0	0	0	0	0	0	0	0	0	0	0	0	0	0	0	0	0	0	0	0	Fungi	Basidiomycota	Microbotryomycetes	Microbotryomycetes_ord_Incertae_sedis	Chrysozymaceae	Sampaiozyma	ingeniosa
OTU1070	0	0	0	0	0	0	0	5	2	0	0	0	0	0	0	0	0	0	0	0	0	0	0	0	0	0	0	0	Fungi	Ascomycota	Sordariomycetes	Hypocreales	Nectriaceae	Stylonectria	purtonii
OTU1071	0	0	1	0	0	0	0	5	0	0	0	0	0	0	0	0	0	0	0	0	0	0	0	0	0	0	0	0	Fungi	Basidiomycota	Exobasidiomycetes	Entylomatales	NA	NA	NA
OTU1072	0	0	0	0	0	0	0	6	0	0	0	0	0	0	0	0	0	0	0	0	0	0	0	0	0	0	0	0	Fungi	Ascomycota	Dothideomycetes	Pleosporales	Leptosphaeriaceae	Leptosphaeria	NA
OTU1073	0	0	0	0	0	0	0	4	0	0	0	0	0	0	0	0	0	0	0	0	0	0	0	0	0	0	0	0	Fungi	Ascomycota	Dothideomycetes	Pleosporales	Leptosphaeriaceae	Leptosphaeria	cirsii
OTU1085	0	0	0	0	0	0	0	0	0	0	0	0	0	0	0	0	0	0	0	0	5	0	0	0	0	0	0	0	Fungi	Basidiomycota	Agaricomycetes	Agaricales	Bolbitiaceae	Conocybe	zeylanica
OTU1089	0	0	0	0	0	0	0	0	0	0	0	0	0	0	0	0	0	0	0	0	0	0	0	0	5	0	0	0	Fungi	Basidiomycota	Cystobasidiomycetes	Cystobasidiales	Cystobasidiaceae	Occultifur	NA
OTU1093	0	0	0	0	0	0	0	0	0	0	0	0	0	0	0	0	0	0	0	0	0	0	0	0	0	5	0	0	Fungi	Basidiomycota	Microbotryomycetes	Microbotryomycetes_ord_Incertae_sedis	Chrysozymaceae	NA	NA
OTU1095	0	0	0	0	0	0	0	0	0	0	0	0	0	0	0	0	0	0	0	0	0	0	0	0	0	5	0	0	Fungi	Basidiomycota	Agaricomycetes	Polyporales	Polyporales_fam_Incertae_sedis	Climacocystis	borealis
OTU1096	0	0	0	0	0	0	0	0	0	0	0	0	0	0	0	0	0	0	0	0	0	0	0	0	0	0	5	0	Fungi	Basidiomycota	Agaricomycetes	NA	NA	NA	NA
OTU1097	0	0	0	0	0	0	0	0	0	0	0	0	0	0	0	0	0	0	0	0	0	0	0	0	0	0	5	0	Fungi	Ascomycota	Sordariomycetes	Hypocreales	NA	NA	NA
OTU1098	0	0	0	0	0	0	0	0	0	0	0	0	0	0	0	0	0	0	0	0	0	0	0	0	0	0	5	0	Fungi	Basidiomycota	Agaricomycetes	Agaricales	Tricholomataceae	Mycena	olivaceomarginata
OTU1099	0	0	4	0	1	0	0	0	0	0	0	0	0	0	0	0	0	0	0	0	0	0	0	0	0	0	4	0	Fungi	Ascomycota	Sordariomycetes	Hypocreales	Nectriaceae	Fusicolla	septimanifiniscientiae
OTU1100	0	0	0	0	0	0	0	0	0	0	0	0	0	0	0	0	0	0	0	0	0	0	0	0	0	0	0	5	Fungi	Basidiomycota	Agaricomycetes	Polyporales	Fomitopsidaceae	Phaeolus	schweinitzii
OTU1102	0	0	0	0	0	0	0	0	0	0	0	0	0	0	0	0	0	0	0	0	0	0	0	0	0	0	0	5	Fungi	Basidiomycota	Agaricomycetes	Agaricales	Strophariaceae	Pholiota	conissans
OTU1104	4	0	0	0	0	0	0	0	0	0	0	0	0	0	0	0	0	0	0	0	0	0	0	0	0	0	0	0	Fungi	Ascomycota	Sordariomycetes	Sordariales	Chaetomiaceae	NA	NA
OTU1105	0	4	0	0	0	0	0	0	0	0	0	0	0	0	0	0	0	0	0	0	0	0	0	0	0	0	0	0	Fungi	Ascomycota	NA	NA	NA	NA	NA
OTU1109	0	3	0	0	0	0	1	0	1	0	0	0	0	0	0	0	0	0	0	0	0	0	0	0	0	0	0	0	Fungi	Ascomycota	Dothideomycetes	Capnodiales	Teratosphaeriaceae	NA	NA
OTU1112	0	0	4	0	0	0	0	0	0	0	0	0	0	0	0	0	0	0	0	0	0	0	0	0	0	0	0	0	Fungi	Basidiomycota	Agaricomycetes	Cantharellales	NA	NA	NA
OTU1113	0	0	4	0	0	0	0	1	0	0	0	0	0	0	0	0	0	0	0	0	0	0	0	0	0	0	0	0	Fungi	Basidiomycota	Agaricomycetes	Agaricales	Agaricales_fam_Incertae_sedis	Uncobasidium	NA
OTU1115	0	0	1	4	0	0	0	2	0	0	0	0	0	0	0	0	0	0	0	0	0	0	0	0	0	0	0	0	Fungi	Ascomycota	Dothideomycetes	Pleosporales	Leptosphaeriaceae	Leptosphaeria	NA
OTU1116	0	3	1	4	0	0	0	1	0	0	0	0	0	0	0	0	0	0	0	0	0	0	0	0	0	2	0	0	Fungi	Ascomycota	Leotiomycetes	Helotiales	Helotiales_fam_Incertae_sedis	Cadophora	luteo-olivacea
OTU1117	0	0	0	4	0	0	0	0	0	0	0	0	0	0	0	0	0	0	0	0	0	0	0	0	0	0	0	0	Fungi	Ascomycota	Leotiomycetes	Helotiales	Helotiaceae	Infundichalara	NA
OTU1118	0	0	0	4	0	0	0	0	0	0	0	0	0	0	0	0	0	0	0	0	0	0	0	0	0	0	0	0	Fungi	Basidiomycota	Agaricomycetes	Agaricales	Lycoperdaceae	Lycoperdon	NA
OTU1119	0	0	0	4	0	0	0	0	0	0	0	0	0	0	0	0	0	0	0	0	0	0	0	0	0	0	0	0	Fungi	Ascomycota	Dothideomycetes	Pleosporales	Leptosphaeriaceae	Leptosphaeria	NA
OTU1120	0	0	0	4	0	0	0	5	0	0	0	0	0	0	0	0	0	0	0	0	0	0	0	0	0	0	0	0	Fungi	Ascomycota	Dothideomycetes	Pleosporales	Leptosphaeriaceae	Leptosphaeria	cirsii
OTU1121	0	0	0	4	0	0	0	1	0	0	0	0	0	0	0	0	0	0	0	0	0	0	0	0	0	0	0	0	Fungi	Ascomycota	Dothideomycetes	Pleosporales	Leptosphaeriaceae	Leptosphaeria	cirsii
OTU1122	0	0	0	0	4	0	0	0	0	0	0	0	0	0	0	0	0	0	0	0	0	0	0	0	0	0	0	0	Fungi	Ascomycota	Sordariomycetes	Hypocreales	NA	NA	NA
OTU1123	0	0	0	0	4	0	0	0	0	0	0	0	0	0	0	0	0	0	0	0	0	0	0	0	0	0	0	0	Fungi	Ascomycota	Dothideomycetes	Capnodiales	Mycosphaerellaceae	Ramularia	NA
OTU1124	0	0	0	1	3	0	0	1	0	0	0	0	0	0	0	0	0	0	0	0	0	0	0	0	0	0	0	0	Fungi	Basidiomycota	Agaricomycetes	Agaricales	Typhulaceae	Typhula	variabilis
OTU1125	0	0	1	0	4	0	0	0	0	0	0	0	0	0	0	0	0	0	0	0	0	0	0	0	0	0	0	0	Fungi	Basidiomycota	Microbotryomycetes	Sporidiobolales	Sporidiobolaceae	Rhodotorula	graminis
OTU1126	0	0	0	0	0	0	0	4	0	0	0	0	0	0	0	0	0	0	0	0	0	0	0	0	0	0	0	0	Fungi	Ascomycota	Dothideomycetes	Venturiales	Sympoventuriaceae	Ochroconis	NA
OTU1127	0	0	0	0	0	0	0	4	0	0	0	0	0	0	0	0	0	0	0	0	0	0	0	0	0	0	0	0	Fungi	Ascomycota	Dothideomycetes	Pleosporales	Leptosphaeriaceae	Leptosphaeria	cirsii
OTU1128	0	0	0	1	0	0	0	6	0	0	0	0	0	0	0	0	0	0	0	0	0	0	0	0	0	0	0	0	Fungi	Ascomycota	Dothideomycetes	Pleosporales	Leptosphaeriaceae	Leptosphaeria	cirsii
OTU1129	0	0	0	0	0	0	0	4	0	0	0	0	0	0	0	0	0	0	0	0	0	0	0	0	0	0	0	0	Fungi	Ascomycota	Sordariomycetes	Hypocreales	Cordycipitaceae	Beauveria	bassiana
OTU1130	0	0	0	0	1	0	0	4	0	0	0	0	0	0	0	0	0	0	0	0	0	0	0	0	0	0	0	0	Fungi	Basidiomycota	Cystobasidiomycetes	Cystobasidiales	Cystobasidiaceae	Cystobasidium	NA
OTU1131	0	0	0	0	0	0	0	4	0	0	0	0	0	0	0	0	0	0	0	0	0	0	0	0	0	0	0	0	Fungi	Basidiomycota	Agaricomycetes	Agaricales	Lycoperdaceae	Lycoperdon	pratense
OTU1132	0	0	0	0	0	0	0	4	0	0	0	0	0	0	0	0	0	0	0	0	0	0	0	0	0	0	0	0	Fungi	Ascomycota	Dothideomycetes	Pleosporales	Leptosphaeriaceae	Leptosphaeria	NA
OTU1133	0	0	0	0	0	0	0	10	0	0	0	0	0	0	0	0	0	0	0	0	0	0	0	0	0	0	0	0	Fungi	Ascomycota	Dothideomycetes	Pleosporales	Leptosphaeriaceae	Leptosphaeria	NA
OTU1134	0	0	0	3	0	0	0	4	0	0	0	0	0	0	0	0	0	0	0	0	0	0	0	0	0	0	0	0	Fungi	Ascomycota	Dothideomycetes	Pleosporales	Leptosphaeriaceae	Leptosphaeria	cirsii
OTU1135	0	0	0	0	0	0	0	4	0	0	0	0	0	0	0	0	0	0	0	0	0	0	0	0	0	0	0	0	Fungi	Ascomycota	Dothideomycetes	Pleosporales	Leptosphaeriaceae	Leptosphaeria	cirsii
OTU1136	0	0	0	0	0	0	0	3	0	0	0	0	0	0	0	0	0	0	0	0	0	0	0	0	0	0	0	0	Fungi	Ascomycota	Dothideomycetes	Pleosporales	Lophiostomataceae	Platystomum	crataegi
OTU1137	0	0	0	0	0	0	0	5	0	0	0	0	0	0	0	0	0	0	0	0	0	0	0	0	0	0	0	0	Fungi	Ascomycota	Dothideomycetes	Pleosporales	Leptosphaeriaceae	Leptosphaeria	cirsii
OTU1138	0	0	0	0	0	0	0	2	0	0	0	0	0	0	0	0	0	0	0	0	0	0	0	0	0	0	0	0	Fungi	Ascomycota	Leotiomycetes	Helotiales	Hyaloscyphaceae	Pezizella	NA
OTU1139	0	0	0	0	0	0	0	4	0	0	0	0	0	0	0	0	0	0	0	0	0	0	0	0	0	0	0	0	Fungi	Basidiomycota	Microbotryomycetes	Sporidiobolales	Sporidiobolaceae	Rhodosporidiobolus	oreadorum
OTU1141	0	0	0	1	0	0	0	0	0	4	0	0	0	0	0	0	0	0	0	0	0	0	0	0	0	0	0	0	Fungi	Basidiomycota	Cystobasidiomycetes	Cystobasidiomycetes_ord_Incertae_sedis	Buckleyzymaceae	Buckleyzyma	aurantiaca
OTU1145	0	0	0	0	0	0	0	0	0	0	0	0	0	0	0	0	0	0	0	0	0	0	0	0	0	0	0	0	Fungi	Ascomycota	Dothideomycetes	NA	NA	NA	NA
OTU1148	0	0	0	0	0	0	0	0	0	0	0	0	0	0	0	4	0	0	0	0	0	0	0	0	0	0	0	0	Fungi	Ascomycota	NA	NA	NA	NA	NA
OTU1149	0	0	0	0	0	0	1	0	0	0	0	0	0	0	0	0	5	0	0	0	0	0	0	0	0	0	0	0	Fungi	Ascomycota	Dothideomycetes	Pleosporales	NA	NA	NA
OTU1152	0	0	0	0	0	0	0	0	0	0	0	0	0	0	0	0	0	0	0	0	4	0	0	0	0	0	0	0	Fungi	Basidiomycota	Agaricomycetes	Agaricales	Psathyrellaceae	Coprinellus	sclerocystidiosus
OTU1153	0	0	0	0	0	0	0	0	0	0	0	0	0	0	0	0	0	0	0	0	4	0	0	0	0	0	0	0	Fungi	Basidiomycota	Agaricostilbomycetes	Agaricostilbales	Kondoaceae	Kondoa	changbaiensis
OTU1154	0	0	0	0	0	0	0	0	0	0	0	0	0	0	0	0	0	0	0	0	0	4	0	0	0	0	0	0	Fungi	Basidiomycota	Agaricomycetes	Trechisporales	Trechisporales_fam_Incertae_sedis	Sistotremastrum	guttuliferum
OTU1155	0	0	0	0	0	0	0	0	0	0	0	0	0	0	0	0	0	0	0	0	0	4	0	0	0	0	0	0	Fungi	Basidiomycota	Agaricomycetes	Polyporales	Steccherinaceae	Steccherinum	ochraceum
OTU1156	0	0	0	0	0	0	0	0	0	0	0	0	0	0	0	0	0	0	0	0	0	0	4	0	0	0	0	0	Fungi	Mortierellomycota	Mortierellomycetes	Mortierellales	Mortierellaceae	Mortierella	hyalina
OTU1162	0	0	0	0	4	0	0	0	0	0	0	0	0	0	0	0	0	0	0	0	0	0	0	0	0	4	0	0	Fungi	Ascomycota	Dothideomycetes	Venturiales	Sympoventuriaceae	Ochroconis	NA
OTU1165	0	0	0	0	0	0	0	0	0	0	0	0	0	0	0	0	0	0	0	0	0	0	0	0	0	4	0	0	Fungi	Ascomycota	Sordariomycetes	Xylariales	Xylariales_fam_Incertae_sedis	Neoidriella	desertorum
OTU1167	0	1	0	0	0	0	0	0	0	0	0	0	0	0	0	0	0	0	0	0	0	0	0	0	0	0	4	0	Fungi	Ascomycota	Dothideomycetes	Pleosporales	Didymosphaeriaceae	Pseudopithomyces	rosae
OTU1170	0	0	0	0	0	0	0	0	0	0	0	0	0	0	0	0	0	0	0	0	0	0	0	0	0	0	4	0	Fungi	Ascomycota	Eurotiomycetes	Chaetothyriales	Herpotrichiellaceae	Cladophialophora	modesta
OTU1171	0	0	0	0	0	0	0	0	0	0	0	0	0	0	0	0	0	0	0	0	0	0	0	0	0	0	0	4	Fungi	Ascomycota	Dothideomycetes	Pleosporales	Leptosphaeriaceae	Plenodomus	biglobosus
OTU1172	0	0	0	0	1	0	0	0	0	0	0	0	0	0	0	0	0	0	0	0	0	0	0	0	0	0	3	4	Fungi	Ascomycota	Eurotiomycetes	Eurotiales	Aspergillaceae	Penicillium	NA
OTU1176	0	3	0	0	0	0	0	0	0	0	0	0	0	0	0	0	0	0	0	0	0	0	0	0	0	0	0	0	Fungi	Basidiomycota	Tremellomycetes	Tremellales	Bulleribasidiaceae	Dioszegia	changbaiensis
OTU1177	0	3	0	0	0	0	0	0	0	0	0	0	0	0	0	0	0	0	0	0	0	0	0	0	0	0	0	0	Fungi	Ascomycota	Sordariomycetes	Diaporthales	Gnomoniaceae	Plagiostoma	aesculi
OTU1178	0	3	0	0	0	0	0	0	0	0	0	0	0	0	0	0	0	0	0	0	0	0	0	0	0	0	0	0	Fungi	Basidiomycota	Microbotryomycetes	Microbotryales	Microbotryaceae	NA	NA
OTU1179	0	3	0	1	0	0	0	0	0	0	0	0	0	0	0	0	0	0	0	0	0	0	0	0	0	0	0	0	Fungi	Ascomycota	Eurotiomycetes	Chaetothyriales	Herpotrichiellaceae	Rhinocladiella	NA
OTU1180	0	3	0	0	0	0	0	0	0	0	0	0	0	0	0	0	0	0	0	0	0	0	0	0	0	0	0	0	Fungi	Ascomycota	Dothideomycetes	Capnodiales	Capnodiales_fam_Incertae_sedis	Hispidoconidioma	alpinum
OTU1182	0	3	0	0	0	0	0	0	0	0	0	0	0	0	0	0	0	0	0	0	0	0	0	0	0	0	0	0	Fungi	Ascomycota	Dothideomycetes	Dothideales	Dothioraceae	Pringsheimia	smilacis
OTU1183	0	0	3	0	0	0	0	0	0	0	0	0	0	0	0	0	0	0	0	0	0	0	0	0	0	0	0	0	Fungi	Basidiomycota	Tremellomycetes	Tremellales	NA	NA	NA
OTU1184	0	0	2	0	0	0	0	0	0	0	0	0	0	0	0	0	0	0	0	0	0	0	0	0	0	0	0	0	Fungi	Ascomycota	Dothideomycetes	Pleosporales	Leptosphaeriaceae	Leptosphaeria	cirsii
OTU1187	0	0	0	3	0	0	0	1	0	0	0	0	0	0	0	0	0	0	0	0	0	0	0	0	0	0	0	0	Fungi	Ascomycota	Dothideomycetes	Pleosporales	Leptosphaeriaceae	Leptosphaeria	cirsii
OTU1190	0	0	0	3	0	0	0	0	0	0	0	0	0	0	0	0	0	0	0	0	0	0	0	0	0	0	0	0	Fungi	Ascomycota	Dothideomycetes	Pleosporales	Pleosporales_fam_Incertae_sedis	Massariosphaeria	roumeguerei
OTU1191	0	0	0	3	0	0	0	1	0	0	0	0	0	0	0	0	0	0	0	0	0	0	0	0	0	0	0	0	Fungi	Basidiomycota	Cystobasidiomycetes	Cystobasidiomycetes_ord_Incertae_sedis	Symmetrosporaceae	Symmetrospora	coprosmae
OTU1194	0	0	0	0	3	0	0	0	0	0	0	0	0	0	0	0	0	0	0	0	0	0	0	0	0	0	0	0	Fungi	Ascomycota	Dothideomycetes	Pleosporales	Phaeosphaeriaceae	Pseudoophiobolus	italicus
OTU1195	0	0	0	0	3	0	0	0	0	0	0	0	0	0	0	0	0	0	0	0	0	0	0	0	0	0	0	0	Fungi	Ascomycota	Pezizomycetes	Pezizales	Discinaceae	Gyromitra	infula
OTU1196	0	0	1	0	3	0	0	1	0	0	0	0	0	0	0	0	0	0	0	0	0	0	0	0	0	0	0	0	Fungi	Ascomycota	Leotiomycetes	Helotiales	Helotiales_fam_Incertae_sedis	Chalara	recta
OTU1197	0	0	1	1	2	0	0	1	0	0	0	0	0	0	0	0	0	0	0	0	0	0	0	0	0	0	0	0	Fungi	Ascomycota	Dothideomycetes	Capnodiales	Extremaceae	NA	NA
OTU1198	0	0	0	0	3	0	0	0	0	0	0	0	0	0	0	0	0	0	0	0	0	0	0	0	0	0	0	0	Fungi	Basidiomycota	Tremellomycetes	Tremellales	NA	NA	NA
OTU1199	0	0	0	0	3	0	0	0	0	0	0	0	0	0	0	0	0	0	0	0	0	0	0	0	0	0	0	0	Fungi	Basidiomycota	Agaricomycetes	Agaricales	Psathyrellaceae	Coprinellus	disseminatus
OTU1203	0	0	0	0	0	0	0	3	0	0	0	0	0	0	0	0	0	0	0	0	0	0	0	0	0	0	0	0	Fungi	Ascomycota	Dothideomycetes	Pleosporales	Leptosphaeriaceae	Leptosphaeria	cirsii
OTU1204	0	0	0	0	0	0	0	3	0	0	0	0	0	0	0	0	0	0	0	0	0	0	0	0	0	0	0	0	Fungi	Basidiomycota	Tremellomycetes	Tremellales	Bulleraceae	Bullera	unica
OTU1205	0	0	0	0	0	0	0	3	0	0	0	0	0	0	0	0	0	0	0	0	0	0	0	0	0	0	0	0	Fungi	Basidiomycota	Agaricostilbomycetes	Agaricostilbales	Kondoaceae	Kondoa	sorbi
OTU1206	0	0	0	0	0	0	0	0	3	0	0	0	0	0	0	0	0	0	0	0	0	0	0	0	0	0	0	0	Fungi	Ascomycota	Dothideomycetes	Pleosporales	Sporormiaceae	NA	NA
OTU1210	0	0	0	0	0	0	0	0	0	0	0	0	0	3	0	0	0	0	0	0	0	0	0	0	0	0	0	0	Fungi	Ascomycota	Dothideomycetes	Pleosporales	Massarinaceae	Helminthosporium	NA
OTU1211	0	0	0	0	0	0	0	0	0	0	0	0	0	3	0	0	0	0	0	0	0	0	0	0	0	0	0	0	Fungi	Basidiomycota	NA	NA	NA	NA	NA
OTU1214	0	0	0	0	0	0	0	0	0	0	0	0	0	0	0	0	0	3	0	0	0	0	0	0	0	0	0	0	Fungi	Ascomycota	Leotiomycetes	Helotiales	Myxotrichaceae	Oidiodendron	NA
OTU1216	0	0	0	0	0	0	0	0	0	0	0	0	0	0	0	0	0	0	3	0	0	0	0	0	0	0	0	0	Fungi	Ascomycota	Dothideomycetes	Capnodiales	NA	NA	NA
OTU1219	0	0	0	0	0	0	0	0	0	0	0	0	0	0	0	0	0	0	0	0	0	0	0	0	3	0	0	0	Fungi	Basidiomycota	Agaricomycetes	Agaricales	Tricholomataceae	Panellus	mitis
OTU1223	0	0	0	0	0	0	0	0	0	0	0	0	0	0	0	0	0	0	0	0	0	0	0	0	0	3	0	0	Fungi	Basidiomycota	Agaricomycetes	Agaricales	Tricholomataceae	Mycena	vulgaris
OTU1224	0	0	0	0	0	0	0	0	0	0	0	0	0	0	0	0	0	0	0	0	0	0	0	0	0	0	3	0	Fungi	Rozellomycota	NA	NA	NA	NA	NA
OTU1225	0	0	0	0	0	0	0	0	0	0	0	0	0	0	0	0	0	0	0	0	0	0	0	0	0	0	0	3	Fungi	Basidiomycota	Agaricomycetes	Agaricales	Tricholomataceae	Clitocybe	ditopa
OTU1226	0	0	0	0	0	0	0	0	0	0	0	0	0	0	0	0	0	0	0	0	0	0	0	0	0	0	0	3	Fungi	Chytridiomycota	NA	NA	NA	NA	NA
OTU1228	2	0	0	0	0	0	0	0	1	0	0	0	0	0	0	0	0	0	0	0	0	0	0	0	0	0	0	0	Fungi	Ascomycota	Dothideomycetes	Venturiales	Sympoventuriaceae	Ochroconis	NA
OTU1229	0	2	0	0	0	0	0	0	0	0	0	0	0	0	0	0	0	0	0	0	0	0	0	0	0	0	0	0	Fungi	Basidiomycota	Spiculogloeomycetes	Spiculogloeales	Spiculogloeaceae	Phyllozyma	NA
OTU1230	0	2	0	1	0	0	0	0	0	0	0	0	0	0	0	0	0	0	0	0	0	0	0	0	0	0	0	0	Fungi	Basidiomycota	Cystobasidiomycetes	Cystobasidiales	Cystobasidiaceae	Occultifur	NA
OTU1231	0	2	0	0	0	0	0	0	0	0	0	0	0	0	0	0	0	0	0	0	0	0	0	0	0	0	0	0	Fungi	Basidiomycota	Tremellomycetes	Tremellales	Tremellaceae	Tremella	phaeophysciae
OTU1232	0	2	0	0	0	0	0	0	0	0	0	0	0	0	0	0	0	0	0	0	0	0	0	0	0	0	0	0	Fungi	Ascomycota	Sordariomycetes	Xylariales	Xylariaceae	Hypoxylon	fuscum
OTU1233	0	0	2	0	0	0	0	0	0	0	0	0	0	0	0	0	0	0	0	0	0	0	0	0	0	0	0	0	Fungi	Ascomycota	Dothideomycetes	Acrospermales	Acrospermaceae	Oomyces	carneoalbus
OTU1234	0	0	2	0	0	0	0	0	0	0	0	0	0	0	0	0	0	0	0	0	0	0	0	0	0	0	0	0	Fungi	Ascomycota	Dothideomycetes	NA	NA	NA	NA
OTU1236	0	0	2	0	1	0	1	0	0	0	0	0	0	0	0	0	0	0	0	0	0	0	0	0	0	0	0	0	Fungi	Ascomycota	Sordariomycetes	Hypocreales	Hypocreaceae	Trichoderma	NA
OTU1239	0	1	0	2	1	0	0	1	0	0	0	0	0	0	0	0	0	0	0	0	0	0	0	0	0	0	0	0	Fungi	Ascomycota	Dothideomycetes	Capnodiales	Extremaceae	Saxophila	tyrrhenica
OTU1242	0	0	0	2	1	0	0	1	0	0	0	0	0	0	0	0	0	0	0	0	0	0	0	0	0	0	0	0	Fungi	Ascomycota	Dothideomycetes	Pleosporales	Lophiostomataceae	Sigarispora	arundinis
OTU1243	0	0	0	2	0	0	0	0	0	0	0	0	0	0	0	0	0	0	0	0	0	0	0	0	0	0	0	0	Fungi	Basidiomycota	Cystobasidiomycetes	Erythrobasidiales	NA	NA	NA
OTU1245	0	0	0	2	0	0	0	0	0	0	0	0	0	0	0	0	0	0	0	0	0	0	0	0	0	0	0	0	Fungi	Basidiomycota	Tremellomycetes	Tremellales	NA	NA	NA
OTU1246	0	1	0	0	2	0	0	0	0	0	0	0	0	0	0	0	0	0	0	0	0	0	0	0	0	0	0	0	Fungi	Ascomycota	Dothideomycetes	NA	NA	NA	NA
OTU1247	0	0	2	2	2	0	0	1	0	0	0	0	0	0	0	0	0	0	0	0	0	0	0	0	0	0	0	0	Fungi	Ascomycota	Leotiomycetes	Thelebolales	Thelebolaceae	Thelebolus	spongiae
OTU1248	0	0	0	0	2	0	0	0	0	0	0	0	0	0	0	0	0	0	0	0	0	0	0	0	0	0	0	0	Fungi	Basidiomycota	Tremellomycetes	Tremellales	Tremellaceae	Cryptococcus	NA
OTU1249	0	0	0	0	2	0	0	0	0	0	0	0	0	0	0	0	0	0	0	0	0	0	0	0	0	0	0	0	Fungi	Basidiomycota	Agaricomycetes	Agaricales	Psathyrellaceae	Coprinopsis	fluvialis
OTU1250	0	0	0	0	2	0	0	0	0	0	0	0	0	0	0	0	0	0	0	0	0	0	0	0	0	0	0	0	Fungi	Basidiomycota	Agaricomycetes	Agaricales	Strophariaceae	Stropharia	hornemannii
OTU1252	0	0	0	0	2	0	0	0	0	0	0	0	0	0	0	0	0	0	0	0	0	0	0	0	0	0	0	0	Fungi	Ascomycota	Dothideomycetes	Pleosporales	Sporormiaceae	Preussia	octomera
OTU1255	0	0	0	0	0	0	2	0	0	0	0	0	0	0	0	0	0	0	0	0	0	0	0	0	0	0	0	0	Fungi	Ascomycota	Dothideomycetes	Pleosporales	Periconiaceae	Periconia	pseudobyssoides
OTU1256	0	0	0	0	0	0	2	0	0	0	0	0	0	0	0	0	0	0	1	0	0	0	0	0	0	0	0	0	Fungi	Ascomycota	Dothideomycetes	Pleosporales	Phaeosphaeriaceae	Setophoma	terrestris
OTU1257	0	0	0	0	0	0	2	0	0	0	0	0	0	0	0	0	0	0	0	0	0	0	0	0	0	0	0	0	Fungi	Ascomycota	Dothideomycetes	Pleosporales	Sporormiaceae	Sporormiella	leporina
OTU1258	0	0	0	0	0	0	0	2	0	0	0	0	0	0	0	0	0	0	0	0	0	0	0	0	0	0	0	0	Fungi	Ascomycota	Sordariomycetes	Microascales	Microascales_fam_Incertae_sedis	Wardomyces	inflatus
OTU1259	0	0	0	0	0	0	0	2	0	0	0	0	0	0	0	0	0	0	0	0	0	0	0	0	0	0	0	0	Fungi	Ascomycota	Dothideomycetes	Capnodiales	Mycosphaerellaceae	Zymoseptoria	NA
OTU1260	0	0	0	0	0	0	0	2	0	0	0	0	0	0	0	0	0	0	0	0	0	0	0	0	0	0	0	0	Fungi	Ascomycota	Sordariomycetes	Sordariales	Chaetomiaceae	Chaetomium	iranianum
OTU1261	0	0	0	0	2	0	0	2	0	0	0	0	0	0	0	0	0	0	0	0	0	0	0	0	0	0	0	0	Fungi	Ascomycota	Leotiomycetes	Helotiales	NA	NA	NA
OTU1262	0	0	0	0	0	0	0	2	0	0	0	0	0	0	0	0	0	0	0	0	0	0	0	0	0	0	0	0	Fungi	Ascomycota	Dothideomycetes	Capnodiales	Teratosphaeriaceae	NA	NA
OTU1263	0	0	0	0	0	0	0	2	0	0	0	0	0	0	0	0	0	0	0	0	0	0	0	0	0	0	0	0	Fungi	Basidiomycota	Agaricomycetes	Russulales	Peniophoraceae	Peniophora	cinerea
OTU1264	0	0	0	0	0	0	0	2	0	0	0	0	0	0	0	0	0	0	0	0	0	0	0	0	0	0	0	0	Fungi	Basidiomycota	Agaricomycetes	Polyporales	Meruliaceae	Merulius	tremellosus
OTU1265	0	0	0	0	0	0	0	2	0	0	0	0	0	0	0	0	0	0	0	0	0	0	0	0	0	0	0	0	Fungi	Basidiomycota	Agaricomycetes	Agaricales	Psathyrellaceae	Parasola	NA
OTU1266	0	0	1	0	0	0	0	2	0	0	0	0	0	0	0	0	0	0	0	0	0	0	0	0	0	0	0	0	Fungi	Basidiomycota	Agaricomycetes	Agaricales	Strophariaceae	Hypholoma	subericaeum
OTU1267	0	0	0	0	0	0	0	2	0	0	0	0	0	0	0	0	0	0	0	0	0	0	0	0	0	0	0	0	Fungi	Ascomycota	Dothideomycetes	Pleosporales	NA	NA	NA
OTU1268	0	0	0	0	0	0	0	2	0	0	0	0	0	0	0	0	0	0	0	0	0	0	0	0	0	0	0	0	Fungi	Ascomycota	Dothideomycetes	Pleosporales	NA	Pseudolophiotrema	elymicola
OTU1274	1	0	0	0	0	0	0	0	0	0	0	0	2	0	0	0	0	0	0	0	0	0	0	0	0	0	0	0	Fungi	Ascomycota	Dothideomycetes	Capnodiales	Teratosphaeriaceae	Apenidiella	strumelloidea
OTU1277	0	0	0	0	0	0	0	0	0	0	0	0	0	0	2	0	0	0	0	0	0	0	0	0	0	0	0	0	Fungi	Basidiomycota	Agaricomycetes	Polyporales	Fomitopsidaceae	Cartilosoma	rene-hentic
OTU1281	0	0	0	0	0	0	0	0	0	0	0	0	0	0	0	0	0	0	0	0	2	0	0	3	8	0	0	3	Fungi	Basidiomycota	Agaricostilbomycetes	Agaricostilbales	Chionosphaeraceae	NA	NA
OTU1288	0	0	0	0	0	0	0	0	0	0	0	0	0	0	0	0	0	0	0	0	0	0	0	2	0	0	0	0	Fungi	Basidiomycota	Agaricomycetes	Agaricales	Pleurotaceae	Pleurotus	pulmonarius
OTU1289	0	0	1	0	0	0	0	0	0	0	0	0	0	0	0	0	0	0	0	0	0	0	0	2	0	0	0	0	Fungi	Basidiomycota	Agaricomycetes	Agaricales	Lycoperdaceae	Lycoperdon	pyriforme
OTU1290	0	0	0	0	0	0	0	0	0	0	0	0	0	0	0	0	0	0	0	0	0	0	0	0	2	0	0	0	Fungi	Basidiomycota	Classiculomycetes	Classiculales	Classiculaceae	NA	NA
OTU1291	0	0	0	0	0	0	0	0	0	0	0	0	0	0	0	0	0	0	0	0	0	0	0	0	0	3	0	0	Fungi	Ascomycota	Sordariomycetes	Hypocreales	Cordycipitaceae	Lecanicillium	primulinum
OTU1292	0	0	0	0	0	0	0	0	0	0	0	0	0	0	0	0	0	0	0	0	0	0	0	0	0	2	0	0	Fungi	Basidiomycota	Microbotryomycetes	Sporidiobolales	Sporidiobolaceae	Rhodotorula	dairenensis
OTU1293	0	0	0	0	1	0	0	0	0	0	0	0	0	0	0	0	0	0	0	0	0	0	0	0	0	3	0	0	Fungi	Ascomycota	Dothideomycetes	Microthyriales	NA	NA	NA
OTU1295	0	0	0	0	0	0	0	0	0	0	0	0	0	0	0	0	0	0	0	0	0	0	0	0	0	0	0	2	Fungi	Ascomycota	Sordariomycetes	Myrmecridiales	Myrmecridiaceae	Myrmecridium	pulvericola
									1302048										25175									731539

## Sheet: Table S4
Table S4: Percentage abundance of fungal OTUs in the samples of winter rye plants
Samples of green leaves (GL), desiccated leaves (DL), and roots (R) were analyzed separately
OTU ID	GL	DL	R	Kingdom	Phylum	Class	Order	Family	Genus	Species
OTU2	42.0759	33.4697	7.18772	Fungi	Ascomycota	Dothideomycetes	Capnodiales	Mycosphaerellaceae	Mycosphaerella	tassiana
OTU4	9.74711	32.9057	8.65026	Fungi	Ascomycota	Sordariomycetes	Xylariales	Microdochiaceae	Microdochium	NA
OTU6	10.2423	0.202582	1.28469	Fungi	Ascomycota	Leotiomycetes	Helotiales	Sclerotiniaceae	NA	NA
OTU7	0.712647	0.285998	27.6166	Fungi	Ascomycota	Leotiomycetes	Thelebolales	Pseudeurotiaceae	Pseudogymnoascus	NA
OTU8	6.77202	3.77358	0.71206	Fungi	Ascomycota	Sordariomycetes	Xylariales	Microdochiaceae	Microdochium	NA
OTU10	0.000460813	0.00794439	9.01305	Fungi	Ascomycota	Leotiomycetes	Helotiales	NA	NA	NA
OTU12	2.78653	2.04171	0.254395	Fungi	Basidiomycota	Tremellomycetes	Tremellales	Bulleribasidiaceae	Vishniacozyma	tephrensis
OTU13	0.0797974	0.0556107	4.36217	Fungi	Ascomycota	Leotiomycetes	Helotiales	Helotiales_fam_Incertae_sedis	Leohumicola	NA
OTU15	2.35199	6.52234	1.82793	Fungi	Ascomycota	Sordariomycetes	Hypocreales	Nectriaceae	Lasionectria	oenanthicola
OTU17	1.72313	1.83118	0.470378	Fungi	Ascomycota	Sordariomycetes	Hypocreales	Tilachlidiaceae	Psychronectria	NA
OTU18	0.180408	1.94638	3.51232	Fungi	Ascomycota	Eurotiomycetes	Eurotiales	Aspergillaceae	Penicillium	aurantiogriseum
OTU19	0.00176645	0	2.73232	Fungi	Ascomycota	Sordariomycetes	Hypocreales	Nectriaceae	Gibberella	NA
OTU20	1.87566	0.893744	0.123165	Fungi	Basidiomycota	Tremellomycetes	Tremellales	Bulleribasidiaceae	Vishniacozyma	victoriae
OTU21	1.55447	0.65144	0.0858464	Fungi	Basidiomycota	Tremellomycetes	Tremellales	NA	NA	NA
OTU22	0.00038401	0	2.09791	Fungi	Ascomycota	Leotiomycetes	Helotiales	Helotiales_fam_Incertae_sedis	Chalara	pseudoaffinis
OTU24	1.10887	0.19861	0.000820189	Fungi	Ascomycota	Dothideomycetes	Pleosporales	Didymellaceae	Neoascochyta	exitialis
OTU25	1.23728	1.03674	0.0154469	Fungi	Basidiomycota	Microbotryomycetes	Kriegeriales	Kriegeriaceae	Phenoliferia	psychrophila
OTU28	0.0112899	0.00794439	1.51079	Fungi	Ascomycota	Leotiomycetes	Helotiales	Helotiaceae	Tetracladium	NA
OTU29	0.788143	0.206554	0.0712197	Fungi	Basidiomycota	Tremellomycetes	Tremellales	Bulleribasidiaceae	Vishniacozyma	victoriae
OTU30	0.134788	0	1.02496	Fungi	Ascomycota	Dothideomycetes	Pleosporales	Leptosphaeriaceae	Leptosphaeria	sclerotioides
OTU32	1.04428	0.190665	0.0339011	Fungi	Basidiomycota	Tremellomycetes	Tremellales	Bulleribasidiaceae	Dioszegia	hungarica
OTU34	0.633003	2.43098	0.007245	Fungi	Basidiomycota	Microbotryomycetes	Kriegeriales	Kriegeriaceae	Phenoliferia	psychrophenolica
OTU36	0	0.00397219	0.876645	Fungi	Ascomycota	Leotiomycetes	Helotiales	Hyaloscyphaceae	Lachnum	NA
OTU37	0.0571408	3.78153	0.621566	Fungi	Ascomycota	Sordariomycetes	Hypocreales	Nectriaceae	Nectria	ramulariae
OTU38	0.00038401	0	1.16098	Fungi	Ascomycota	Leotiomycetes	Helotiales	Helotiaceae	NA	NA
OTU39	0.13018	0.297915	0.662576	Fungi	Ascomycota	Dothideomycetes	Pleosporales	Phaeosphaeriaceae	NA	NA
OTU41	0.252986	1.93446	0.575909	Fungi	Ascomycota	Leotiomycetes	Helotiales	Dermateaceae	Oculimacula	yallundae
OTU42	0.007373	0.0675273	0.852176	Fungi	Ascomycota	Dothideomycetes	Pleosporales	Melanommataceae	NA	NA
OTU43	0.0035329	0	0.716298	Fungi	Ascomycota	Leotiomycetes	Helotiales	Helotiales_fam_Incertae_sedis	Cadophora	NA
OTU45	0.00168965	0	0.96919	Fungi	Ascomycota	Leotiomycetes	Helotiales	Hyaloscyphaceae	Cistella	NA
OTU46	0.000230406	0	0.675425	Fungi	Ascomycota	Leotiomycetes	Helotiales	Helotiaceae	Bisporella	NA
OTU48	0.243463	0.0913605	0.617329	Fungi	Ascomycota	Leotiomycetes	Helotiales	Dermateaceae	Helgardia	anguioides
OTU49	0.0789525	0.32572	0.500725	Fungi	Ascomycota	Dothideomycetes	Pleosporales	Lentitheciaceae	Pleurophoma	NA
OTU50	0.000844823	0	0.633869	Fungi	Ascomycota	Sordariomycetes	Glomerellales	Plectosphaerellaceae	Gibellulopsis	piscis
OTU51	0.00537615	0.0238332	0.632502	Fungi	Ascomycota	Eurotiomycetes	Eurotiales	Aspergillaceae	Penicillium	decumbens
OTU52	0.0189701	0	0.618696	Fungi	Ascomycota	Leotiomycetes	Helotiales	Helotiaceae	Tetracladium	NA
OTU53	0	0	0.50592	Fungi	Chytridiomycota	Chytridiomycetes	Chytridiales	Chytridiaceae	NA	NA
OTU54	0.329251	0	0.000136698	Fungi	Ascomycota	Dothideomycetes	Pleosporales	Didymellaceae	Neoascochyta	graminicola
OTU55	0.0176645	0	0.421304	Fungi	Mucoromycota	Mucoromycetes	Mucorales	Rhizopodaceae	Rhizopus	arrhizus
OTU57	0.000998427	0	0.413512	Fungi	Ascomycota	Sordariomycetes	Xylariales	Microdochiaceae	Microdochium	NA
OTU58	0.26635	0.0278054	0.00205047	Fungi	Ascomycota	Dothideomycetes	Pleosporales	Didymellaceae	Neoascochyta	europaea
OTU62	0.17772	0	0.0386856	Fungi	Ascomycota	Sordariomycetes	Hypocreales	Hypocreales_fam_Incertae_sedis	Sarocladium	summerbellii
OTU64	0.295227	0.0516385	0.278864	Fungi	Ascomycota	Dothideomycetes	Pleosporales	Phaeosphaeriaceae	Phaeosphaeria	tofieldiae
OTU66	0.00307208	0	0.34858	Fungi	Ascomycota	Eurotiomycetes	Eurotiales	Aspergillaceae	Penicillium	NA
OTU69	0.00514574	0	0.292671	Fungi	Ascomycota	Dothideomycetes	Venturiales	Sympoventuriaceae	Ochroconis	NA
OTU70	0	0.00397219	0.320284	Fungi	Ascomycota	Leotiomycetes	Helotiales	Myxotrichaceae	NA	NA
OTU72	7.68021e-05	0	0.400662	Fungi	Ascomycota	Dothideomycetes	Pleosporales	Melanommataceae	NA	NA
OTU73	0.148151	0	0.0194111	Fungi	Basidiomycota	Tremellomycetes	Tremellales	Bulleribasidiaceae	Dioszegia	changbaiensis
OTU75	7.68021e-05	0	0.260547	Fungi	Ascomycota	Dothideomycetes	Pleosporales	Phaeosphaeriaceae	Ophiosphaerella	NA
OTU77	0.0115971	0	0.226509	Fungi	Ascomycota	Sordariomycetes	Hypocreales	Hypocreales_fam_Incertae_sedis	Sarocladium	bactrocephalum
OTU80	0	0	0.227739	Fungi	Basidiomycota	Microbotryomycetes	Leucosporidiales	Leucosporidiaceae	Leucosporidium	intermedium
OTU84	0.0392459	0	0.137792	Fungi	Ascomycota	Dothideomycetes	Pleosporales	Phaeosphaeriaceae	Septoriella	hirta
OTU85	0.00192005	0.00397219	0.229243	Fungi	Ascomycota	Sordariomycetes	Sordariales	Lasiosphaeriaceae	Apodus	deciduus
OTU86	0.114358	0.0476663	0.0474342	Fungi	Ascomycota	Leotiomycetes	Helotiales	Hyaloscyphaceae	Cistella	grevillei
OTU87	0.0036097	0.0436941	0.186456	Fungi	Ascomycota	Sordariomycetes	Hypocreales	Nectriaceae	Gibberella	intricans
OTU91	0.00184325	0.019861	0.295131	Fungi	Ascomycota	Sordariomycetes	Hypocreales	Nectriaceae	Gibberella	NA
OTU92	0.0662034	0.178749	0.0757308	Fungi	Ascomycota	Sordariomycetes	Hypocreales	NA	NA	NA
OTU98	0.105833	0	0.0154469	Fungi	Ascomycota	Sordariomycetes	Hypocreales	Hypocreales_fam_Incertae_sedis	NA	NA
OTU99	0.0910873	0.19861	0	Fungi	Basidiomycota	Tremellomycetes	Tremellales	Bulleribasidiaceae	Vishniacozyma	globispora
OTU100	0.00422411	0	0.170326	Fungi	Ascomycota	Sordariomycetes	Sordariales	Lasiosphaeriaceae	Podospora	multipilosa
OTU102	0	0	0.258496	Fungi	Ascomycota	Leotiomycetes	Phacidiales	Phacidiaceae	Gremmenia	infestans
OTU103	0	0	0.158296	Fungi	Ascomycota	Dothideomycetes	Pleosporales	Lindgomycetaceae	Clohesyomyces	aquaticus
OTU108	0.000307208	0	0.194521	Fungi	Ascomycota	Leotiomycetes	Helotiales	NA	NA	NA
OTU109	0.00161284	0	0.150095	Fungi	Ascomycota	Dothideomycetes	Pleosporales	Phaeosphaeriaceae	Paraphoma	chrysanthemicola
OTU110	7.68021e-05	0	0.332176	Fungi	Ascomycota	Sordariomycetes	Sordariales	Chaetomiaceae	Chaetomium	angustispirale
OTU111	0.00345609	0.00794439	0.147907	Fungi	Ascomycota	Eurotiomycetes	Onygenales	NA	NA	NA
OTU112	0	0	0.157476	Fungi	Ascomycota	Dothideomycetes	Pleosporales	Thyridariaceae	Roussoella	NA
OTU115	0	0	0.140936	Fungi	Ascomycota	Dothideomycetes	Dothideales	Dothioraceae	Dothiora	NA
OTU116	0.0231174	0.627607	0.0706729	Fungi	Mortierellomycota	Mortierellomycetes	Mortierellales	Mortierellaceae	Mortierella	hyalina
OTU122	0.000153604	0	0.141209	Fungi	Ascomycota	Leotiomycetes	Helotiales	Helotiaceae	Crocicreas	NA
OTU123	0	0	0.119611	Fungi	Basidiomycota	Agaricomycetes	Agaricales	NA	NA	NA
OTU124	0	0	0.123848	Fungi	Ascomycota	Dothideomycetes	Pleosporales	Didymosphaeriaceae	Paraphaeosphaeria	NA
OTU135	0.000230406	0	0.110999	Fungi	Ascomycota	Eurotiomycetes	Eurotiales	Aspergillaceae	Aspergillus	NA
OTU138	0.000921625	0	0.0984226	Fungi	Ascomycota	Leotiomycetes	Helotiales	NA	NA	NA
OTU140	0	0	0.0904942	Fungi	Ascomycota	Leotiomycetes	Helotiales	Myxotrichaceae	NA	NA
OTU141	0.0344841	0.222443	0.0252892	Fungi	Ascomycota	Dothideomycetes	Pleosporales	Pleosporaceae	Alternaria	alternata
OTU144	0.0186629	0	0.0526288	Fungi	Ascomycota	Leotiomycetes	Helotiales	Helotiaceae	Crocicreas	NA
OTU146	0.021351	0	0.0657518	Fungi	Ascomycota	Sordariomycetes	Hypocreales	Nectriaceae	Gibberella	tricincta
OTU148	0.000230406	0	0.0816088	Fungi	Ascomycota	Sordariomycetes	Coniochaetales	Coniochaetaceae	NA	NA
OTU149	0.00130564	0	0.163081	Fungi	Basidiomycota	Agaricomycetes	Atheliales	Atheliaceae	Athelia	NA
OTU150	0	0	0.0852996	Fungi	Ascomycota	Leotiomycetes	Helotiales	Sclerotiniaceae	NA	NA
OTU152	0.000460813	0	0.142303	Fungi	Ascomycota	Sordariomycetes	Hypocreales	Hypocreaceae	Monocillium	mucidum
OTU155	0	0.0436941	0.0847528	Fungi	Ascomycota	Sordariomycetes	Hypocreales	Nectriaceae	Volutella	NA
OTU157	0.0664338	0	0.0367718	Fungi	Ascomycota	Dothideomycetes	Pleosporales	Phaeosphaeriaceae	NA	NA
OTU158	0.0377098	0.540218	0.000683491	Fungi	Ascomycota	Leotiomycetes	Helotiales	Hyaloscyphaceae	Cistella	NA
OTU161	0.0433164	0.0714995	0	Fungi	Basidiomycota	Tremellomycetes	Holtermanniales	Holtermanniales_fam_Incertae_sedis	Holtermanniella	takashimae
OTU162	0	0	0.0780546	Fungi	Chytridiomycota	Chytridiomycetes	Chytridiales	Chytridiaceae	NA	NA
OTU163	0.00038401	0	0.0816088	Fungi	Ascomycota	Dothideomycetes	Pleosporales	Phaeosphaeriaceae	Paraphoma	radicina
OTU167	0	0	0.0792849	Fungi	Ascomycota	Leotiomycetes	Helotiales	NA	NA	NA
OTU171	0.00145924	0	0.130683	Fungi	Ascomycota	Sordariomycetes	Sordariales	Lasiosphaeriaceae	NA	NA
OTU172	0.00230406	0.0158888	0.0660252	Fungi	Ascomycota	Sordariomycetes	Phomatosporales	Phomatosporaceae	Phomatospora	striatigera
OTU174	0.0633617	0	0.0187276	Fungi	Ascomycota	Dothideomycetes	Pleosporales	Phaeosphaeriaceae	Vagicola	chlamydospora
OTU176	0.0363274	0.019861	0.00123028	Fungi	Basidiomycota	Tremellomycetes	Filobasidiales	Filobasidiaceae	Filobasidium	stepposum
OTU177	0.0370186	0	0.000683491	Fungi	Basidiomycota	Tremellomycetes	Cystofilobasidiales	Mrakiaceae	Itersonilia	pannonica
OTU178	0.0341769	0	0.00355415	Fungi	Basidiomycota	Tremellomycetes	Tremellales	Tremellaceae	Bulleromyces	albus
OTU181	0.00122883	0.0595829	0.056593	Fungi	Ascomycota	Sordariomycetes	Hypocreales	Nectriaceae	Fusarium	oxysporum
OTU182	0	0	0.0602839	Fungi	Ascomycota	Eurotiomycetes	Eurotiales	Aspergillaceae	Penicillium	NA
OTU184	0.0275719	0.305859	0.00560462	Fungi	Basidiomycota	Microbotryomycetes	Kriegeriales	Kriegeriaceae	Phenoliferia	psychrophila
OTU185	0.000230406	0	0.0600105	Fungi	Ascomycota	Dothideomycetes	Pleosporales	Cucurbitariaceae	Pyrenochaeta	NA
OTU187	0.000153604	0	0.0596004	Fungi	Ascomycota	Sordariomycetes	Hypocreales	Hypocreales_fam_Incertae_sedis	Acremonium	furcatum
OTU189	0.000460813	0	0.0578233	Fungi	Ascomycota	Leotiomycetes	Helotiales	Helotiaceae	Tetracladium	NA
OTU191	0	0	0.0564563	Fungi	Ascomycota	Leotiomycetes	Helotiales	Helotiaceae	Hymenoscyphus	menthae
OTU193	0.0140548	0	0.0814721	Fungi	Ascomycota	Leotiomycetes	Helotiales	Helotiaceae	Crocicreas	NA
OTU194	7.68021e-05	0	0.0546792	Fungi	Mortierellomycota	Mortierellomycetes	Mortierellales	Mortierellaceae	Mortierella	elongata
OTU195	0.00107523	0	0.0524921	Fungi	Ascomycota	Dothideomycetes	Pleosporales	Cucurbitariaceae	Pyrenochaetopsis	leptospora
OTU197	0	0	0.060694	Fungi	Ascomycota	Eurotiomycetes	Eurotiales	Aspergillaceae	Penicillium	NA
OTU198	0.0417035	0	0.000136698	Fungi	Basidiomycota	Tremellomycetes	Cystofilobasidiales	Cystofilobasidiaceae	Cystofilobasidium	macerans
OTU206	0.000614417	0	0.0803785	Fungi	Ascomycota	Sordariomycetes	Sordariales	Lasiosphaeriaceae	Schizothecium	carpinicola
OTU208	0.00145924	0.190665	0.0865299	Fungi	Ascomycota	Leotiomycetes	Helotiales	Helotiaceae	Infundichalara	minuta
OTU213	0	0	0.0452471	Fungi	Ascomycota	Leotiomycetes	Helotiales	Hyaloscyphaceae	Cistella	NA
OTU219	0	0	0.0705362	Fungi	Ascomycota	Eurotiomycetes	Onygenales	Onygenales_fam_Incertae_sedis	Chrysosporium	lobatum
OTU220	0.0244999	0	0.00833858	Fungi	Basidiomycota	Microbotryomycetes	Sporidiobolales	Sporidiobolaceae	Sporobolomyces	roseus
OTU221	0	0	0.0429232	Fungi	Ascomycota	Leotiomycetes	Helotiales	Hyaloscyphaceae	Trichopezizella	NA
OTU222	7.68021e-05	0.0476663	0.0682124	Fungi	Basidiomycota	Malasseziomycetes	Malasseziales	Malasseziaceae	Malassezia	restricta
OTU224	7.68021e-05	0	0.0459306	Fungi	Ascomycota	Eurotiomycetes	Onygenales	NA	NA	NA
OTU225	0.00913945	0	0.0284332	Fungi	Ascomycota	Dothideomycetes	Pleosporales	NA	NA	NA
OTU226	0	0	0.0411461	Fungi	Ascomycota	Dothideomycetes	Pleosporales	Cucurbitariaceae	Pyrenochaetopsis	leptospora
OTU228	0.00284168	0	0.0354048	Fungi	Ascomycota	Dothideomycetes	Pleosporales	Dictyosporiaceae	NA	NA
OTU229	0	0	0.0401892	Fungi	Basidiomycota	Microbotryomycetes	Sporidiobolales	Sporidiobolaceae	Rhodotorula	mucilaginosa
OTU230	0.000691219	0	0.0386856	Fungi	Ascomycota	Sordariomycetes	Hypocreales	Hypocreaceae	Trichoderma	brevicompactum
OTU234	7.68021e-05	0	0.040736	Fungi	Ascomycota	Sordariomycetes	Glomerellales	Plectosphaerellaceae	Plectosphaerella	cucumerina
OTU236	0	0	0.0385489	Fungi	Ascomycota	Leotiomycetes	Helotiales	Helotiaceae	Crocicreas	NA
OTU239	0.000230406	0	0.0384122	Fungi	Ascomycota	Sordariomycetes	Hypocreales	Bionectriaceae	Clonostachys	NA
OTU240	0.0195077	0.0794439	0	Fungi	Basidiomycota	Tremellomycetes	Filobasidiales	Filobasidiaceae	Filobasidium	NA
OTU242	0	0	0.0358149	Fungi	Ascomycota	Leotiomycetes	Helotiales	Helotiaceae	Allophylaria	subliciformis
OTU244	0	0	0.0356782	Fungi	Ascomycota	Leotiomycetes	Helotiales	Helotiaceae	Tetracladium	NA
OTU245	0	0	0.0531756	Fungi	Ascomycota	Leotiomycetes	Helotiales	NA	NA	NA
OTU251	0	0	0.0467508	Fungi	Ascomycota	Leotiomycetes	Helotiales	NA	NA	NA
OTU252	0.0185093	0	0	Fungi	Ascomycota	Leotiomycetes	Helotiales	NA	NA	NA
OTU253	0.0175109	0	0.00300736	Fungi	Basidiomycota	Tremellomycetes	Cystofilobasidiales	Cystofilobasidiales_fam_Incertae_sedis	Mrakiella	aquatica
OTU255	0	0	0.0329442	Fungi	Ascomycota	Sordariomycetes	Hypocreales	NA	NA	NA
OTU256	0.000153604	0	0.0333543	Fungi	Ascomycota	Sordariomycetes	Chaetosphaeriales	Chaetosphaeriaceae	Chloridium	NA
OTU257	7.68021e-05	0	0.0550893	Fungi	Ascomycota	Sordariomycetes	Xylariales	Xylariaceae	Rosellinia	abscondita
OTU258	0.000153604	0	0.0314406	Fungi	Ascomycota	Dothideomycetes	Pleosporales	NA	NA	NA
OTU259	7.68021e-05	0	0.0412828	Fungi	Basidiomycota	Agaricostilbomycetes	Agaricostilbales	Chionosphaeraceae	NA	NA
OTU260	0.000537615	0	0.0296635	Fungi	Ascomycota	Dothideomycetes	Pleosporales	Amniculicolaceae	Murispora	galii
OTU261	0.0178181	0	0	Fungi	Basidiomycota	Tremellomycetes	Cystofilobasidiales	Mrakiaceae	Mrakia	frigida
OTU264	0	0	0.0296635	Fungi	Ascomycota	Sordariomycetes	NA	NA	NA	NA
OTU265	0	0	0.0291167	Fungi	Ascomycota	Saccharomycetes	Saccharomycetales	Saccharomycetales_fam_Incertae_sedis	Candida	parapsilosis
OTU266	0.021735	0	0	Fungi	Ascomycota	Dothideomycetes	Pleosporales	Leptosphaeriaceae	Leptosphaeria	NA
OTU268	0	0.0158888	0.0285699	Fungi	Basidiomycota	Agaricomycetes	Agaricales	Lycoperdaceae	Lycoperdon	nigrescens
OTU269	0.0165124	0	0.000820189	Fungi	Basidiomycota	Tremellomycetes	Tremellales	Bulleribasidiaceae	Vishniacozyma	dimennae
OTU271	0.000460813	0	0.0449737	Fungi	Ascomycota	Sordariomycetes	Coniochaetales	Coniochaetaceae	Coniochaeta	verticillata
OTU272	0.0129796	0	0.00669821	Fungi	Ascomycota	Dothideomycetes	Pleosporales	Lophiostomataceae	Trichometasphaeria	NA
OTU273	0.000153604	0	0.0282965	Fungi	Ascomycota	Sordariomycetes	Microascales	Microascaceae	Cephalotrichum	stemonitis
OTU274	0.000153604	0	0.0280231	Fungi	Ascomycota	Leotiomycetes	Thelebolales	Pseudeurotiaceae	NA	NA
OTU279	0.0142852	0.00397219	0	Fungi	Ascomycota	Dothideomycetes	Dothideales	Aureobasidiaceae	Aureobasidium	subglaciale
OTU283	0	0	0.0468875	Fungi	Ascomycota	Leotiomycetes	Thelebolales	Pseudeurotiaceae	NA	NA
OTU284	0.0149764	0	0	Fungi	Ascomycota	Dothideomycetes	Dothideales	Aureobasidiaceae	Aureobasidium	pullulans
OTU285	0.00645138	0	0.011756	Fungi	Ascomycota	Dothideomycetes	Pleosporales	Didymellaceae	NA	NA
OTU286	0.000307208	0	0.0377287	Fungi	Ascomycota	Sordariomycetes	Coniochaetales	Coniochaetaceae	Coniochaeta	NA
OTU287	0.000230406	0	0.0241956	Fungi	Basidiomycota	Tremellomycetes	Tremellales	Tremellaceae	Cryptococcus	NA
OTU288	7.68021e-05	0	0.0251525	Fungi	Ascomycota	Dothideomycetes	Pleosporales	Phaeosphaeriaceae	Paraphoma	chrysanthemicola
OTU289	0	0	0.049348	Fungi	Mortierellomycota	Mortierellomycetes	Mortierellales	Mortierellaceae	Mortierella	sarnyensis
OTU293	0.000537615	0	0.0250158	Fungi	Ascomycota	Leotiomycetes	Helotiales	Helotiaceae	Tetracladium	NA
OTU296	0.000230406	0	0.0237855	Fungi	Ascomycota	Sordariomycetes	Hypocreales	Hypocreaceae	Trichoderma	NA
OTU298	0.0145924	0.150943	0.000820189	Fungi	Basidiomycota	Tremellomycetes	Cystofilobasidiales	Mrakiaceae	Mrakia	niccombsii
OTU300	0.000230406	0	0.0226919	Fungi	Ascomycota	Eurotiomycetes	Onygenales	NA	NA	NA
OTU301	0.000460813	0	0.0220084	Fungi	Mucoromycota	Mucoromycetes	Mucorales	Mucoraceae	Mucor	hiemalis
OTU302	0.0124419	0	0.00109358	Fungi	Basidiomycota	Tremellomycetes	Tremellales	Rhynchogastremataceae	Papiliotrema	frias
OTU305	0.0208902	0	0.00109358	Fungi	Ascomycota	Leotiomycetes	Helotiales	Hyaloscyphaceae	Cistella	NA
OTU306	0	0	0.0228286	Fungi	Ascomycota	Sordariomycetes	Hypocreales	Clavicipitaceae	Claviceps	NA
OTU309	0.00138244	0	0.031714	Fungi	Ascomycota	Eurotiomycetes	Eurotiales	Trichocomaceae	Talaromyces	sayulitensis
OTU311	0.000307208	0	0.0210515	Fungi	Ascomycota	Eurotiomycetes	Onygenales	Arachnomycetaceae	Arachnomyces	NA
OTU312	0.0120579	0	0.00191377	Fungi	Basidiomycota	Cystobasidiomycetes	Erythrobasidiales	NA	NA	NA
OTU314	0	0	0.0213249	Fungi	Ascomycota	Sordariomycetes	Hypocreales	Hypocreales_fam_Incertae_sedis	Sarocladium	kiliense
OTU315	0	0	0.0213249	Fungi	Ascomycota	Leotiomycetes	Helotiales	Helotiaceae	NA	NA
OTU316	11.3312	0.19861	4.90938	Fungi	Ascomycota	Leotiomycetes	Helotiales	Helotiaceae	Tetracladium	NA
OTU318	0	0	0.0211882	Fungi	Ascomycota	Dothideomycetes	Pleosporales	Periconiaceae	Periconia	pseudodigitata
OTU321	0.0114435	0.0119166	0	Fungi	Basidiomycota	Tremellomycetes	Filobasidiales	Filobasidiaceae	Naganishia	albida
OTU322	0	0	0.0209148	Fungi	Ascomycota	Eurotiomycetes	Onygenales	Onygenales_fam_Incertae_sedis	Chrysosporium	pseudomerdarium
OTU324	0.000768021	0	0.0377287	Fungi	Ascomycota	Eurotiomycetes	Eurotiales	Trichocomaceae	Talaromyces	ucrainicus
OTU326	0.00245767	0	0.0277497	Fungi	Basidiomycota	Agaricostilbomycetes	Agaricostilbales	Chionosphaeraceae	NA	NA
OTU328	0.0074498	0	0.0239222	Fungi	Ascomycota	Dothideomycetes	Pleosporales	Pleosporaceae	Alternaria	metachromatica
OTU329	0.0115203	0	0	Fungi	Ascomycota	Sordariomycetes	Hypocreales	Stachybotryaceae	Stachybotrys	NA
OTU330	0.000230406	0	0.0192744	Fungi	Mortierellomycota	Mortierellomycetes	Mortierellales	Mortierellaceae	Mortierella	alpina
OTU332	0.00276488	0.0794439	0.0116193	Fungi	Ascomycota	Leotiomycetes	Helotiales	Helotiaceae	Infundichalara	minuta
OTU336	0.0103683	0	0	Fungi	Ascomycota	Leotiomycetes	Helotiales	NA	NA	NA
OTU338	0	0.0158888	0.0184542	Fungi	Basidiomycota	Agaricomycetes	Agaricales	Tricholomataceae	Baeospora	myosura
OTU339	0.00122883	0.16286	0.0121661	Fungi	Basidiomycota	Agaricomycetes	Agaricales	Typhulaceae	Typhula	ishikariensis
OTU340	0.000153604	0	0.0277497	Fungi	Ascomycota	Eurotiomycetes	Eurotiales	Aspergillaceae	Aspergillus	ustus
OTU341	0.000153604	0	0.0184542	Fungi	Ascomycota	Sordariomycetes	Hypocreales	Hypocreales_fam_Incertae_sedis	Emericellopsis	NA
OTU342	0	0	0.0272029	Fungi	Ascomycota	Sordariomycetes	Sordariales	Lasiosphaeriaceae	NA	NA
OTU343	0.00975386	0.0238332	0.000546792	Fungi	Ascomycota	Leotiomycetes	Helotiales	Helotiaceae	Articulospora	proliferata
OTU345	0.00514574	0	0.00943217	Fungi	Ascomycota	Leotiomycetes	Helotiales	Helotiaceae	Crocicreas	NA
OTU346	0.00660498	0.00794439	0.007245	Fungi	Ascomycota	Sordariomycetes	Hypocreales	NA	NA	NA
OTU347	0.00760341	0.0119166	0.00355415	Fungi	Basidiomycota	Cystobasidiomycetes	Cystobasidiales	Cystobasidiaceae	Cystobasidium	pinicola
OTU348	0	0	0.0174974	Fungi	Olpidiomycota	Olpidiomycetes	Olpidiales	Olpidiaceae	Olpidium	brassicae
OTU349	0	0	0.0173607	Fungi	Ascomycota	Leotiomycetes	Helotiales	Helotiaceae	NA	NA
OTU355	0.000307208	0	0.0337644	Fungi	Chytridiomycota	NA	NA	NA	NA	NA
OTU356	0	0	0.0165405	Fungi	Basidiomycota	Agaricomycetes	Agaricales	Entolomataceae	Entoloma	sericeum
OTU363	0	0	0.0157203	Fungi	Ascomycota	NA	NA	NA	NA	NA
OTU364	0.00875544	0.00794439	0	Fungi	Basidiomycota	Tremellomycetes	Holtermanniales	Holtermanniales_fam_Incertae_sedis	Holtermanniella	takashimae
OTU366	0	0	0.0151735	Fungi	Monoblepharomycota	Sanchytriomycetes	Sanchytriales	Sanchytriaceae	Sanchytrium	NA
OTU368	0	0	0.0157203	Fungi	Ascomycota	Dothideomycetes	Pleosporales	Leptosphaeriaceae	Plenodomus	biglobosus
OTU369	0.000307208	0	0.0146267	Fungi	Ascomycota	Leotiomycetes	Helotiales	Myxotrichaceae	Oidiodendron	cereale
OTU372	0	0	0.0150368	Fungi	Basidiomycota	Agaricomycetes	Agaricales	Strophariaceae	Pholiota	squarrosa
OTU375	7.68021e-05	0	0.0169506	Fungi	Ascomycota	Eurotiomycetes	Chaetothyriales	Herpotrichiellaceae	Exophiala	equina
OTU377	7.68021e-05	0	0.0146267	Fungi	Ascomycota	Sordariomycetes	Hypocreales	Clavicipitaceae	Metarhizium	anisopliae
OTU382	0	0	0.0138065	Fungi	Basidiomycota	Atractiellomycetes	Atractiellales	Hoehnelomycetaceae	Atractiella	solani
OTU385	0.00606736	0	0.00478443	Fungi	Basidiomycota	Microbotryomycetes	Leucosporidiales	Leucosporidiaceae	Leucosporidium	golubevii
OTU390	0.000230406	0	0.013123	Fungi	Ascomycota	Sordariomycetes	Hypocreales	Stachybotryaceae	Myrothecium	NA
OTU394	0	0	0.0174974	Fungi	Ascomycota	Sordariomycetes	Hypocreales	Clavicipitaceae	Metarhizium	marquandii
OTU396	0.00545295	0	0.00396425	Fungi	Ascomycota	NA	NA	NA	NA	NA
OTU397	0	0	0.0132597	Fungi	Basidiomycota	Agaricomycetes	NA	NA	NA	NA
OTU400	0	0	0.017224	Fungi	Ascomycota	Sordariomycetes	Sordariales	Lasiosphaeriaceae	NA	NA
OTU401	0.00698899	0	0	Fungi	Ascomycota	Leotiomycetes	Helotiales	Helotiaceae	Tetracladium	NA
OTU402	0	0	0.0128496	Fungi	Ascomycota	Sordariomycetes	Microascales	Halosphaeriaceae	NA	NA
OTU404	0	0	0.013123	Fungi	Chytridiomycota	Chytridiomycetes	Chytridiales	Chytridiaceae	NA	NA
OTU407	0	0	0.0143533	Fungi	Ascomycota	NA	NA	NA	NA	NA
OTU408	0	0	0.0127129	Fungi	Ascomycota	Sordariomycetes	Magnaporthales	Magnaporthaceae	Gaeumannomyces	hyphopodioides
OTU412	0.000614417	0	0.0109358	Fungi	Ascomycota	Dothideomycetes	Pleosporales	Melanommataceae	NA	NA
OTU414	0.0111363	0	0.00136698	Fungi	Basidiomycota	Tremellomycetes	Tremellales	Bulleribasidiaceae	Vishniacozyma	heimaeyensis
OTU417	0.00038401	0	0.0138065	Fungi	Ascomycota	Sordariomycetes	Hypocreales	Hypocreaceae	Monocillium	griseo-ochraceum
OTU421	0.00998427	0	0	Fungi	Basidiomycota	Tremellomycetes	Tremellales	Bulleribasidiaceae	Vishniacozyma	dimennae
OTU422	0.00660498	0	0.0116193	Fungi	Ascomycota	Leotiomycetes	Helotiales	Helotiaceae	Crocicreas	NA
OTU423	0	0	0.0113459	Fungi	Ascomycota	Dothideomycetes	Pleosporales	NA	NA	NA
OTU424	0.00522254	0.0238332	0.00642481	Fungi	Ascomycota	Leotiomycetes	Helotiales	Hyaloscyphaceae	Cistella	NA
OTU425	0	0	0.0187276	Fungi	Ascomycota	Sordariomycetes	Sordariales	Lasiosphaeriaceae	Schizothecium	NA
OTU428	0	0	0.0109358	Fungi	Basidiomycota	Agaricomycetes	Polyporales	Ganodermataceae	Ganoderma	NA
OTU433	0	0	0.0107992	Fungi	Monoblepharomycota	Sanchytriomycetes	Sanchytriales	Sanchytriaceae	Sanchytrium	NA
OTU436	0	0	0.0102524	Fungi	Ascomycota	Dothideomycetes	Pleosporales	Pleosporaceae	Drechslera	NA
OTU443	0.00522254	0	0.00232387	Fungi	Basidiomycota	Cystobasidiomycetes	Erythrobasidiales	NA	NA	NA
OTU444	0.00145924	0	0.0839326	Fungi	Ascomycota	Dothideomycetes	Venturiales	Sympoventuriaceae	Ochroconis	NA
OTU445	7.68021e-05	0	0.00984226	Fungi	Ascomycota	Sordariomycetes	Hypocreales	Bionectriaceae	Gliomastix	murorum
OTU446	0.000998427	0	0.00847528	Fungi	Ascomycota	Eurotiomycetes	Chaetothyriales	Trichomeriaceae	Knufia	NA
OTU447	7.68021e-05	0.00794439	0.0112092	Fungi	Basidiomycota	Cystobasidiomycetes	Cystobasidiales	Cystobasidiaceae	Occultifur	NA
OTU448	0	0	0.00970557	Fungi	Ascomycota	Leotiomycetes	Helotiales	NA	NA	NA
OTU453	0	0	0.0107992	Fungi	Ascomycota	Dothideomycetes	Venturiales	Sympoventuriaceae	Ochroconis	NA
OTU455	0	0	0.00915877	Fungi	Basidiomycota	Agaricomycetes	Agaricales	Lycoperdaceae	Disciseda	NA
OTU458	0.00499214	0	0	Fungi	Ascomycota	Dothideomycetes	Pleosporales	Lentitheciaceae	NA	NA
OTU461	0.00307208	0	0.0112092	Fungi	Ascomycota	Sordariomycetes	Sordariales	Chaetomiaceae	Chaetomium	subspirilliferum
OTU464	7.68021e-05	0	0.00833858	Fungi	Ascomycota	Dothideomycetes	Pleosporales	Amniculicolaceae	Murispora	NA
OTU466	0	0.00794439	0.00847528	Fungi	Ascomycota	Eurotiomycetes	Eurotiales	Aspergillaceae	Penicillium	brevicompactum
OTU468	0	0	0.00833858	Fungi	Ascomycota	Sordariomycetes	Hypocreales	Hypocreales_fam_Incertae_sedis	Acremonium	tubakii
OTU471	0.000691219	0	0.00806519	Fungi	Ascomycota	Sordariomycetes	Myrmecridiales	Myrmecridiaceae	Myrmecridium	schulzeri
OTU472	0	0	0.00820189	Fungi	Mortierellomycota	Mortierellomycetes	Mortierellales	Mortierellaceae	Mortierella	fimbricystis
OTU473	0.000768021	0	0.00779179	Fungi	Ascomycota	Sordariomycetes	Sordariales	Chaetomiaceae	Dichotomopilus	indicus
OTU477	0.00460813	0	0	Fungi	Basidiomycota	Cystobasidiomycetes	Cystobasidiales	Cystobasidiaceae	Cystobasidium	minuta
OTU478	0.0037633	0	0.00177708	Fungi	Basidiomycota	Tremellomycetes	Filobasidiales	Filobasidiaceae	Filobasidium	NA
OTU479	0.00506894	0	0	Fungi	Ascomycota	Dothideomycetes	Dothideales	Aureobasidiaceae	Aureobasidium	subglaciale
OTU485	0	0	0.01449	Fungi	Ascomycota	Sordariomycetes	Hypocreales	Hypocreaceae	Trichoderma	NA
OTU488	0	0	0.0075184	Fungi	Ascomycota	Eurotiomycetes	Eurotiales	Aspergillaceae	Penicillium	NA
OTU489	0	0	0.00765509	Fungi	Mucoromycota	Mucoromycetes	Mucorales	Cunninghamellaceae	Absidia	glauca
OTU492	0.00445452	0	0	Fungi	Ascomycota	Dothideomycetes	Pleosporales	Sporormiaceae	Preussia	tenerifae
OTU495	0	0	0.0073817	Fungi	Ascomycota	Leotiomycetes	Helotiales	Helotiaceae	Tetracladium	NA
OTU497	7.68021e-05	0	0.00642481	Fungi	Ascomycota	Eurotiomycetes	Eurotiales	Aspergillaceae	Penicillium	simplicissimum
OTU498	0.000537615	0	0.0073817	Fungi	Ascomycota	Sordariomycetes	Coniochaetales	Coniochaetaceae	NA	NA
OTU499	0	0	0.0112092	Fungi	Ascomycota	Sordariomycetes	Sordariales	Lasiosphaeriaceae	Schizothecium	NA
OTU501	7.68021e-05	0	0.00970557	Fungi	Ascomycota	Sordariomycetes	Hypocreales	Hypocreales_fam_Incertae_sedis	Acremonium	persicinum
OTU504	0.00522254	0	0	Fungi	Basidiomycota	Tremellomycetes	Tremellales	Bulleribasidiaceae	Dioszegia	butyracea
OTU507	0	0	0.0069716	Fungi	Ascomycota	Leotiomycetes	Helotiales	Hyaloscyphaceae	Trichopezizella	NA
OTU509	0.000153604	0	0.00669821	Fungi	Basidiomycota	Agaricomycetes	Russulales	Stereaceae	Stereum	hirsutum
OTU510	0	0	0.0071083	Fungi	Ascomycota	Sordariomycetes	Hypocreales	Hypocreaceae	Trichoderma	NA
OTU511	0	0	0.0069716	Fungi	Ascomycota	Dothideomycetes	Pleosporales	Pleomassariaceae	NA	NA
OTU513	0.0036865	0	0.000136698	Fungi	Ascomycota	Leotiomycetes	Helotiales	Helotiaceae	Crocicreas	NA
OTU514	0.00529934	0	0	Fungi	Basidiomycota	Tremellomycetes	Tremellales	Bulleribasidiaceae	Hannaella	coprosmae
OTU517	7.68021e-05	0.190665	0.00369085	Fungi	Ascomycota	Leotiomycetes	Thelebolales	Pseudeurotiaceae	Pseudogymnoascus	pannorum
OTU518	0	0	0.00656151	Fungi	Olpidiomycota	Olpidiomycetes	Olpidiales	Olpidiaceae	Olpidium	brassicae
OTU519	0	0	0.00669821	Fungi	Basidiomycota	Agaricomycetes	Boletales	Suillaceae	Suillus	granulatus
OTU520	0.000614417	0.166832	0.000546792	Fungi	Ascomycota	Leotiomycetes	Helotiales	Helotiales_fam_Incertae_sedis	Rhynchosporium	secalis
OTU522	0	0	0.00683491	Fungi	Ascomycota	Leotiomycetes	Helotiales	NA	NA	NA
OTU527	0	0	0.00642481	Fungi	Basidiomycota	Microbotryomycetes	Sporidiobolales	Sporidiobolaceae	Sporobolomyces	roseus
OTU528	0	0	0.00628811	Fungi	Mucoromycota	Mucoromycetes	Mucorales	Mucoraceae	Mucor	circinelloides
OTU529	0	0	0.00669821	Fungi	Basidiobolomycota	Basidiobolomycetes	Basidiobolales	NA	NA	NA
OTU531	0.0036097	0	0	Fungi	Basidiomycota	Tremellomycetes	Cystofilobasidiales	Mrakiaceae	Udeniomyces	puniceus
OTU533	0.00107523	0	0.00423764	Fungi	Ascomycota	Dothideomycetes	Pleosporales	Phaeosphaeriaceae	NA	NA
OTU534	0.000691219	0	0.00615142	Fungi	Ascomycota	Leotiomycetes	Helotiales	Helotiaceae	Tetracladium	NA
OTU535	0	0	0.00833858	Fungi	Basidiomycota	Tremellomycetes	NA	NA	NA	NA
OTU536	0.00238086	0	0.00259726	Fungi	Basidiomycota	Tremellomycetes	Filobasidiales	Piskurozymaceae	Solicoccozyma	fuscescens
OTU537	0.00215046	0	0.00246057	Fungi	Basidiomycota	Cystobasidiomycetes	Cystobasidiales	Cystobasidiaceae	Cystobasidium	pinicola
OTU538	0	0	0.00615142	Fungi	Ascomycota	Eurotiomycetes	Eurotiales	Aspergillaceae	Penicillium	NA
OTU540	0.000614417	0	0.00505783	Fungi	Basidiomycota	Cystobasidiomycetes	Cystobasidiales	Cystobasidiaceae	Cystobasidium	lysinophilum
OTU543	0	0	0.00587802	Fungi	Ascomycota	Eurotiomycetes	Eurotiales	Aspergillaceae	Penicillium	NA
OTU544	0	0	0.00601472	Fungi	Basidiomycota	Malasseziomycetes	Malasseziales	NA	NA	NA
OTU546	0	0	0.00615142	Fungi	Mortierellomycota	Mortierellomycetes	Mortierellales	Mortierellaceae	Mortierella	NA
OTU548	0.00314889	0	0.000410094	Fungi	Ascomycota	Leotiomycetes	Helotiales	Helotiaceae	Crocicreas	NA
OTU550	0.00330249	0	0	Fungi	Ascomycota	Sordariomycetes	Hypocreales	Stachybotryaceae	Myrothecium	NA
OTU553	0.00215046	0	0.00191377	Fungi	Ascomycota	Sordariomycetes	Hypocreales	Hypocreales_fam_Incertae_sedis	Sarocladium	NA
OTU555	0	0	0.00546792	Fungi	Ascomycota	Sordariomycetes	Hypocreales	Nectriaceae	Fusarium	concentricum
OTU557	0	0	0.00560462	Fungi	Ascomycota	Sordariomycetes	Hypocreales	Hypocreaceae	Trichoderma	NA
OTU558	0	0	0.00533123	Fungi	Ascomycota	Sordariomycetes	Myrmecridiales	Myrmecridiaceae	Myrmecridium	hiemale
OTU559	0.00307208	0	0	Fungi	Basidiomycota	Tremellomycetes	Filobasidiales	Filobasidiaceae	Filobasidium	oeirense
OTU565	0.00176645	0	0.00205047	Fungi	Basidiomycota	Cystobasidiomycetes	NA	NA	NA	NA
OTU567	0.00637457	0	0.00792849	Fungi	Ascomycota	Leotiomycetes	Helotiales	Helotiaceae	Tetracladium	NA
OTU568	0.00337929	0	0.000956887	Fungi	Ascomycota	Dothideomycetes	Venturiales	Sympoventuriaceae	Ochroconis	NA
OTU569	0	0	0.00492113	Fungi	Basidiomycota	Agaricomycetes	Polyporales	Steccherinaceae	Steccherinum	fimbriatum
OTU573	0.000153604	0	0.00492113	Fungi	Ascomycota	Sordariomycetes	Hypocreales	Bionectriaceae	Clonostachys	rosea
OTU574	0	0	0.00505783	Fungi	Ascomycota	Leotiomycetes	Helotiales	Helotiaceae	Tetracladium	apiense
OTU575	0.00422411	0	0	Fungi	Basidiomycota	Tremellomycetes	Tremellales	Bulleribasidiaceae	Dioszegia	changbaiensis
OTU576	0.00314889	0	0	Fungi	Ascomycota	Dothideomycetes	Pleosporales	Pleosporaceae	Alternaria	rosae
OTU578	0	0	0.0112092	Fungi	Ascomycota	Sordariomycetes	Sordariales	Lasiosphaeriaceae	Schizothecium	miniglutinans
OTU579	0	0	0.00464774	Fungi	Basidiomycota	Agaricomycetes	Geastrales	Geastraceae	Geastrum	fuscogleba
OTU580	0.000153604	0	0.00437434	Fungi	Ascomycota	Dothideomycetes	Venturiales	NA	NA	NA
OTU582	0	0	0.00464774	Fungi	Ascomycota	Dothideomycetes	Venturiales	Sympoventuriaceae	Ochroconis	NA
OTU585	0	0	0.00464774	Fungi	Basidiomycota	Agaricomycetes	NA	NA	NA	NA
OTU586	0.000460813	0	0.00410094	Fungi	Ascomycota	Dothideomycetes	Pleosporales	NA	NA	NA
OTU590	7.68021e-05	0	0.00437434	Fungi	Ascomycota	Dothideomycetes	Pleosporales	Periconiaceae	Periconia	NA
OTU592	0.000153604	0.119166	0	Fungi	Mucoromycota	Mucoromycetes	Mucorales	Mucoraceae	Actinomucor	elegans
OTU593	0.00245767	0	0	Fungi	Basidiomycota	Tremellomycetes	Holtermanniales	Holtermanniales_fam_Incertae_sedis	Holtermanniella	takashimae
OTU595	0.000230406	0	0.00423764	Fungi	Ascomycota	Leotiomycetes	Helotiales	Helotiaceae	Tetracladium	NA
OTU596	0.00038401	0	0.00423764	Fungi	Ascomycota	Eurotiomycetes	Chaetothyriales	Herpotrichiellaceae	Exophiala	NA
OTU597	0.000307208	0	0.00341745	Fungi	Ascomycota	Leotiomycetes	Helotiales	Helotiaceae	Tetracladium	NA
OTU604	0	0	0.00546792	Fungi	Basidiomycota	Agaricomycetes	Auriculariales	NA	NA	NA
OTU609	0.00245767	0	0	Fungi	Ascomycota	Dothideomycetes	Pleosporales	Phaeosphaeriaceae	Phaeosphaeria	caricicola
OTU610	0.00307208	0	0	Fungi	Basidiomycota	Microbotryomycetes	Leucosporidiales	Leucosporidiaceae	Leucosporidium	drummii
OTU611	0.000460813	0.019861	0.00328075	Fungi	Ascomycota	Eurotiomycetes	Eurotiales	Aspergillaceae	Penicillium	bialowiezense
OTU613	0	0	0.00396425	Fungi	Basidiomycota	Agaricomycetes	Agaricales	Psathyrellaceae	Psathyrella	sublatispora
OTU615	0	0	0.00396425	Fungi	Ascomycota	Sordariomycetes	Glomerellales	Plectosphaerellaceae	Acrostalagmus	luteoalbus
OTU619	0.000153604	0	0.00410094	Fungi	Ascomycota	Dothideomycetes	Pleosporales	Torulaceae	Dendryphion	europaeum
OTU622	0	0	0.00423764	Fungi	Ascomycota	Dothideomycetes	Venturiales	Sympoventuriaceae	Ochroconis	NA
OTU623	0	0	0.00382755	Fungi	Basidiomycota	Agaricomycetes	Hymenochaetales	Schizoporaceae	Xylodon	raduloides
OTU626	0	0	0.00396425	Fungi	Basidiomycota	Agaricomycetes	Agaricales	Lycoperdaceae	Bovista	NA
OTU627	0.000691219	0	0.00369085	Fungi	Ascomycota	Dothideomycetes	Pleosporales	Didymellaceae	Didymella	NA
OTU628	0	0.0635551	0.0183175	Fungi	Basidiomycota	Malasseziomycetes	Malasseziales	Malasseziaceae	Malassezia	globosa
OTU630	0.00238086	0	0	Fungi	Ascomycota	Eurotiomycetes	Chaetothyriales	Trichomeriaceae	Knufia	cryptophialidica
OTU631	7.68021e-05	0	0.00259726	Fungi	Basidiomycota	Agaricomycetes	Polyporales	Fomitopsidaceae	Antrodia	xantha
OTU635	0	0	0.00355415	Fungi	Basidiomycota	Agaricomycetes	Polyporales	Meripilaceae	Meripilus	giganteus
OTU636	0	0	0.00369085	Fungi	Ascomycota	Eurotiomycetes	Onygenales	Gymnoascaceae	Leucothecium	emdenii
OTU638	0	0	0.00355415	Fungi	Ascomycota	Leotiomycetes	Helotiales	Helotiaceae	Scytalidium	lignicola
OTU640	0	0	0.00369085	Fungi	Ascomycota	Leotiomycetes	Helotiales	Hyaloscyphaceae	Calycina	ellisii
OTU641	0	0	0.00369085	Fungi	Ascomycota	Sordariomycetes	Sordariales	Chaetomiaceae	NA	NA
OTU642	0	0	0.00355415	Fungi	Ascomycota	Dothideomycetes	Pleosporales	Periconiaceae	Periconia	NA
OTU643	0.000691219	0	0.00218717	Fungi	Ascomycota	Sordariomycetes	Hypocreales	Cordycipitaceae	Beauveria	NA
OTU645	0	0	0.00355415	Fungi	Basidiomycota	Agaricomycetes	Russulales	Peniophoraceae	Peniophora	laeta
OTU646	0	0	0.00341745	Fungi	Ascomycota	Sordariomycetes	Hypocreales	Hypocreales_fam_Incertae_sedis	Acremonium	fusidioides
OTU647	0	0	0.00642481	Fungi	Basidiomycota	Agaricomycetes	Polyporales	Fomitopsidaceae	Piptoporus	betulinus
OTU651	0	0	0.00355415	Fungi	Ascomycota	Sordariomycetes	Hypocreales	Nectriaceae	NA	NA
OTU652	0	0	0.00341745	Fungi	Ascomycota	Dothideomycetes	Pleosporales	NA	NA	NA
OTU653	0	0	0.00341745	Fungi	Basidiomycota	Agaricomycetes	Boletales	Tapinellaceae	Pseudomerulius	aureus
OTU654	0	0	0.00341745	Fungi	Ascomycota	Dothideomycetes	Dothideomycetes_ord_Incertae_sedis	Eremomycetaceae	Arthrographis	longispora
OTU655	0.000307208	0	0.00259726	Fungi	Ascomycota	Eurotiomycetes	Chaetothyriales	Trichomeriaceae	Knufia	NA
OTU659	0	0	0.00396425	Fungi	Ascomycota	Leotiomycetes	Helotiales	Helotiales_fam_Incertae_sedis	Cadophora	NA
OTU660	0	0	0.00328075	Fungi	Ascomycota	Sordariomycetes	Hypocreales	Hypocreaceae	NA	NA
OTU662	0	0	0.00328075	Fungi	Ascomycota	Eurotiomycetes	Onygenales	Gymnoascaceae	Gymnoascus	reessii
OTU663	0	0	0.00314406	Fungi	Ascomycota	Sordariomycetes	Hypocreales	Cordycipitaceae	Lecanicillium	lecanii
OTU664	0	0	0.00355415	Fungi	Chytridiomycota	NA	NA	NA	NA	NA
OTU665	0	0	0.00437434	Fungi	Ascomycota	Eurotiomycetes	Eurotiales	Trichocomaceae	Talaromyces	rugulosus
OTU666	0.00184325	0	0	Fungi	Ascomycota	Dothideomycetes	Pleosporales	Didymosphaeriaceae	Paraphaeosphaeria	NA
OTU667	0.000921625	0	0.00191377	Fungi	Ascomycota	Sordariomycetes	Sordariales	Chaetomiaceae	Humicola	grisea
OTU671	0	0	0.00341745	Fungi	Ascomycota	Sordariomycetes	Hypocreales	Niessliaceae	NA	NA
OTU673	0	0	0.00314406	Fungi	Ascomycota	Eurotiomycetes	Eurotiales	Aspergillaceae	Phialosimplex	NA
OTU675	0	0	0.00314406	Fungi	Mortierellomycota	Mortierellomycetes	Mortierellales	Mortierellaceae	Mortierella	NA
OTU676	0	0	0.00300736	Fungi	Ascomycota	Eurotiomycetes	Eurotiales	Aspergillaceae	Penicillium	atrosanguineum
OTU677	0.00207366	0	0	Fungi	Basidiomycota	Tremellomycetes	Filobasidiales	Filobasidiaceae	Filobasidium	wieringae
OTU681	0	0	0.00328075	Fungi	Ascomycota	Sordariomycetes	Xylariales	Xylariaceae	Biscogniauxia	nummularia
OTU682	0	0	0.00300736	Fungi	Ascomycota	Eurotiomycetes	Chaetothyriales	Herpotrichiellaceae	Exophiala	bonariae
OTU683	0	0	0.00396425	Fungi	Ascomycota	Dothideomycetes	Pleosporales	Leptosphaeriaceae	Plenodomus	biglobosus
OTU684	0	0	0.00300736	Fungi	Ascomycota	Sordariomycetes	Hypocreales	Hypocreales_fam_Incertae_sedis	Acremonium	rutilum
OTU688	0	0	0.00314406	Fungi	Ascomycota	Eurotiomycetes	Eurotiales	Trichocomaceae	Thermomyces	lanuginosus
OTU694	0	0	0.00287066	Fungi	Mucoromycota	Mucoromycetes	Mucorales	Mucoraceae	Mucor	circinelloides
OTU695	0	0	0.00287066	Fungi	Basidiomycota	Agaricomycetes	Agaricomycetes_ord_Incertae_sedis	Agaricomycetes_fam_Incertae_sedis	Akenomyces	costatus
OTU696	0	0	0.00287066	Fungi	Ascomycota	Lecanoromycetes	NA	NA	NA	NA
OTU698	7.68021e-05	0	0.00287066	Fungi	Ascomycota	Dothideomycetes	Venturiales	Sympoventuriaceae	Ochroconis	NA
OTU699	0.00168965	0	0	Fungi	Ascomycota	Dothideomycetes	Pleosporales	Periconiaceae	Periconia	pseudodigitata
OTU700	0.000460813	0.0675273	0	Fungi	Ascomycota	Dothideomycetes	Capnodiales	Teratosphaeriaceae	Elasticomyces	elasticus
OTU708	0	0	0.00273396	Fungi	Ascomycota	Orbiliomycetes	Orbiliales	Orbiliaceae	NA	NA
OTU712	0	0	0.00273396	Fungi	Ascomycota	Eurotiomycetes	Chaetothyriales	Herpotrichiellaceae	Exophiala	NA
OTU713	0	0	0.00273396	Fungi	Ascomycota	Eurotiomycetes	Eurotiales	Aspergillaceae	Aspergillus	awamori
OTU714	0.00153604	0	0	Fungi	Ascomycota	Leotiomycetes	Helotiales	Helotiaceae	Crocicreas	NA
OTU716	0.000537615	0	0.00177708	Fungi	Ascomycota	Dothideomycetes	Venturiales	Sympoventuriaceae	Ochroconis	NA
OTU717	0.00161284	0	0	Fungi	Basidiomycota	Tremellomycetes	Cystofilobasidiales	Mrakiaceae	Mrakia	frigida
OTU718	0.000998427	0	0.000546792	Fungi	Ascomycota	Leotiomycetes	Helotiales	Hyaloscyphaceae	Cistella	grevillei
OTU719	0.00145924	0	0	Fungi	Basidiomycota	Agaricomycetes	Agaricales	Typhulaceae	Typhula	ishikariensis
OTU721	0.000307208	0	0.00273396	Fungi	Ascomycota	Sordariomycetes	Coniochaetales	Coniochaetaceae	Lecythophora	NA
OTU723	0	0	0.00287066	Fungi	Chytridiomycota	Rhizophlyctidomycetes	Rhizophlyctidales	Rhizophlyctidaceae	Rhizophlyctis	rosea
OTU724	0	0	0.00259726	Fungi	Ascomycota	Eurotiomycetes	Chaetothyriales	Herpotrichiellaceae	Heteroconium	NA
OTU725	0	0	0.00259726	Fungi	Ascomycota	Sordariomycetes	Sordariales	NA	NA	NA
OTU727	0.000307208	0.0556107	0	Fungi	Ascomycota	Dothideomycetes	Dothideales	Dothioraceae	Hormonema	macrosporum
OTU729	0.00138244	0	0	Fungi	Basidiomycota	Tremellomycetes	Tremellales	Bulleribasidiaceae	Vishniacozyma	dimennae
OTU734	0	0	0.00246057	Fungi	Chytridiomycota	NA	NA	NA	NA	NA
OTU740	0	0	0.00246057	Fungi	Ascomycota	Sordariomycetes	Hypocreales	NA	NA	NA
OTU741	7.68021e-05	0	0.00246057	Fungi	Ascomycota	Eurotiomycetes	Eurotiales	Trichocomaceae	Talaromyces	NA
OTU743	0	0	0.00259726	Fungi	Ascomycota	Dothideomycetes	Pleosporales	Cucurbitariaceae	Pyrenochaeta	keratinophila
OTU750	7.68021e-05	0	0.00259726	Fungi	Ascomycota	Dothideomycetes	Pleosporales	Lindgomycetaceae	Clohesyomyces	NA
OTU757	0	0	0.00232387	Fungi	Basidiomycota	Agaricomycetes	Polyporales	Steccherinaceae	Steccherinum	ochraceum
OTU759	0.00122883	0	0	Fungi	Ascomycota	Leotiomycetes	Helotiales	Helotiales_fam_Incertae_sedis	Cadophora	NA
OTU766	0.000153604	0.0834161	0.00218717	Fungi	Ascomycota	Leotiomycetes	Helotiales	Helotiaceae	Crocicreas	pallidum
OTU769	0	0	0.00205047	Fungi	Ascomycota	Dothideomycetes	Venturiales	Sympoventuriaceae	Pseudosigmoidea	ibarakiensis
OTU772	0	0	0.00218717	Fungi	Basidiomycota	Agaricomycetes	Russulales	Stereaceae	Stereum	ostrea
OTU773	0	0	0.00218717	Fungi	Ascomycota	Sordariomycetes	Glomerellales	Plectosphaerellaceae	Verticillium	biguttatum
OTU774	0	0	0.00218717	Fungi	Basidiomycota	Agaricomycetes	Agaricales	Tricholomataceae	Clitocybe	nebularis
OTU777	0	0	0.00218717	Fungi	Ascomycota	Eurotiomycetes	Onygenales	Arachnomycetaceae	Arachnomyces	gracilis
OTU778	0	0	0.00232387	Fungi	Ascomycota	Sordariomycetes	Hypocreales	Hypocreaceae	Trichoderma	NA
OTU779	0.00115203	0	0	Fungi	Ascomycota	Dothideomycetes	Pleosporales	Pleosporaceae	Alternaria	NA
OTU780	0.00245767	0	0	Fungi	Ascomycota	Sordariomycetes	Hypocreales	Nectriaceae	Fusicolla	aquaeductuum
OTU787	0	0	0.00205047	Fungi	Basidiomycota	Agaricomycetes	Russulales	Peniophoraceae	Peniophora	cinerea
OTU790	0	0	0.00218717	Fungi	Basidiomycota	Agaricomycetes	Cantharellales	Cantharellales_fam_Incertae_sedis	Sistotrema	oblongisporum
OTU792	0	0	0.00205047	Fungi	Basidiomycota	Agaricomycetes	Hymenochaetales	Hymenochaetales_fam_Incertae_sedis	Trichaptum	abietinum
OTU793	7.68021e-05	0	0.00205047	Fungi	Mortierellomycota	Mortierellomycetes	Mortierellales	Mortierellaceae	Mortierella	alpina
OTU794	0	0	0.00205047	Fungi	Ascomycota	Sordariomycetes	Hypocreales	Hypocreaceae	Trichoderma	aerugineum
OTU795	0	0	0.00205047	Fungi	Ascomycota	Dothideomycetes	Venturiales	Sympoventuriaceae	Ochroconis	NA
OTU797	0.000998427	0	0	Fungi	Basidiomycota	Tremellomycetes	Cystofilobasidiales	Mrakiaceae	Tausonia	pullulans
OTU798	0.00115203	0	0	Fungi	Ascomycota	Eurotiomycetes	Chaetothyriales	Herpotrichiellaceae	Coniosporium	NA
OTU800	0.00107523	0	0	Fungi	Ascomycota	Dothideomycetes	Pleosporales	Pleosporaceae	Curvularia	NA
OTU801	0.000537615	0.0397219	0	Fungi	Ascomycota	Leotiomycetes	Helotiales	Helotiales_fam_Incertae_sedis	Hyalodendriella	betulae
OTU803	0.00115203	0	0	Fungi	Basidiomycota	Cystobasidiomycetes	Cystobasidiales	Cystobasidiaceae	Cystobasidium	pinicola
OTU804	0.00161284	0	0	Fungi	Basidiomycota	Tremellomycetes	Tremellales	Bulleribasidiaceae	Dioszegia	fristingensis
OTU811	0	0	0.00191377	Fungi	Ascomycota	Leotiomycetes	Helotiales	Helotiales_fam_Incertae_sedis	Leohumicola	NA
OTU815	0	0	0.00191377	Fungi	Ascomycota	Dothideomycetes	Pleosporales	Phaeosphaeriaceae	Paraphoma	chlamydocopiosa
OTU817	0	0	0.00191377	Fungi	Ascomycota	Sordariomycetes	Sordariales	Lasiosphaeriaceae	Schizothecium	NA
OTU818	7.68021e-05	0	0.00191377	Fungi	Basidiomycota	Agaricomycetes	Hymenochaetales	Schizoporaceae	Hyphodontia	pallidula
OTU820	0	0	0.00191377	Fungi	Ascomycota	Sordariomycetes	Hypocreales	NA	NA	NA
OTU821	0	0	0.00273396	Fungi	Ascomycota	Sordariomycetes	Sordariales	Lasiosphaeriaceae	Schizothecium	NA
OTU823	0.000921625	0.0238332	0	Fungi	Ascomycota	Eurotiomycetes	Eurotiales	Aspergillaceae	Aspergillus	NA
OTU824	0.000998427	0	0	Fungi	Ascomycota	Sordariomycetes	Xylariales	Bartaliniaceae	Truncatella	angustata
OTU825	0.00115203	0	0	Fungi	Ascomycota	Dothideomycetes	Pleosporales	Lindgomycetaceae	NA	NA
OTU826	0.000998427	0	0	Fungi	Ascomycota	Dothideomycetes	Pleosporales	Didymellaceae	Didymella	NA
OTU828	0.00138244	0	0	Fungi	Ascomycota	Dothideomycetes	Pleosporales	Leptosphaeriaceae	Leptosphaeria	NA
OTU834	0	0	0.00177708	Fungi	Ascomycota	Sordariomycetes	Sordariales	Lasiosphaeriaceae	Podospora	decidua
OTU837	0	0	0.00177708	Fungi	Ascomycota	Sordariomycetes	Hypocreales	Nectriaceae	Fusarium	algeriense
OTU839	0.000153604	0	0.00177708	Fungi	Basidiomycota	Agaricostilbomycetes	Agaricostilbales	Kondoaceae	Bensingtonia	NA
OTU841	0	0	0.00177708	Fungi	Ascomycota	Sordariomycetes	Hypocreales	Clavicipitaceae	Metarhizium	marquandii
OTU843	0	0	0.00177708	Fungi	Ascomycota	Eurotiomycetes	Eurotiales	Aspergillaceae	Penicillium	NA
OTU846	0.000921625	0	0	Fungi	Ascomycota	Sordariomycetes	NA	NA	NA	NA
OTU847	0.000844823	0	0	Fungi	Ascomycota	Dothideomycetes	Pleosporales	Sporormiaceae	Preussia	tetramera
OTU850	7.68021e-05	0	0	Fungi	Ascomycota	Dothideomycetes	Pleosporales	Periconiaceae	Periconia	pseudodigitata
OTU856	0	0	0.00150368	Fungi	Ascomycota	Sordariomycetes	Hypocreales	Hypocreaceae	Trichoderma	reesei
OTU857	0	0	0.00164038	Fungi	Ascomycota	Leotiomycetes	Helotiales	NA	NA	NA
OTU860	0	0	0.00177708	Fungi	Basidiomycota	Agaricomycetes	Polyporales	Meruliaceae	Mycoacia	uda
OTU861	0	0	0.00164038	Fungi	Ascomycota	Dothideomycetes	Microthyriales	NA	NA	NA
OTU862	0.00038401	0	0.00191377	Fungi	Ascomycota	Sordariomycetes	Ophiostomatales	Ophiostomataceae	Sporothrix	brunneoviolacea
OTU865	0.00130564	0	0	Fungi	Basidiomycota	Tremellomycetes	Tremellales	Bulleribasidiaceae	Dioszegia	NA
OTU869	0	0.0436941	0	Fungi	Ascomycota	Lecanoromycetes	Lecanorales	Parmeliaceae	Hypogymnia	tubulosa
OTU873	0	0	0.00150368	Fungi	Basidiomycota	Agaricomycetes	Hymenochaetales	Schizoporaceae	Xylodon	crustosus
OTU875	0	0	0.00150368	Fungi	Basidiomycota	Agaricomycetes	Agaricales	Agaricaceae	Lepiota	NA
OTU877	0	0	0.00150368	Fungi	Chytridiomycota	Lobulomycetes	NA	NA	NA	NA
OTU878	0	0	0.00150368	Fungi	Basidiomycota	Agaricomycetes	Agaricales	Typhulaceae	Typhula	sclerotioides
OTU881	0	0	0.00150368	Fungi	Ascomycota	Dothideomycetes	Pleosporales	Phaeosphaeriaceae	Phaeosphaeria	NA
OTU882	0	0	0.00150368	Fungi	Basidiomycota	Agaricomycetes	Hymenochaetales	Schizoporaceae	Xylodon	erastii
OTU883	0	0	0.00150368	Fungi	Basidiomycota	Agaricomycetes	Cantharellales	Ceratobasidiaceae	Thanatephorus	cucumeris
OTU884	0	0	0.00150368	Fungi	Ascomycota	Dothideomycetes	Pleosporales	Lentitheciaceae	Darksidea	NA
OTU885	0	0	0.00150368	Fungi	Basidiomycota	Agaricomycetes	Hymenochaetales	Schizoporaceae	Alutaceodontia	alutacea
OTU889	0.000768021	0	0	Fungi	Basidiomycota	Agaricomycetes	Agaricales	Typhulaceae	Typhula	ishikariensis
OTU890	0.000768021	0	0	Fungi	Basidiomycota	Tremellomycetes	Tremellales	Bulleribasidiaceae	Dioszegia	rishiriensis
OTU895	0	0	0.00136698	Fungi	Basidiomycota	Agaricomycetes	Agaricales	Tricholomataceae	Tricholoma	albobrunneum
OTU896	0	0	0.00136698	Fungi	Ascomycota	Pezizomycotina_cls_Incertae_sedis	Pezizomycotina_ord_Incertae_sedis	Pezizomycotina_fam_Incertae_sedis	Isthmolongispora	NA
OTU897	0	0	0.00150368	Fungi	Basidiomycota	Agaricomycetes	Cantharellales	Ceratobasidiaceae	Thanatephorus	cucumeris
OTU898	0	0	0.00136698	Fungi	Basidiomycota	Agaricomycetes	Polyporales	Meruliaceae	Phlebia	radiata
OTU899	0	0	0.00136698	Fungi	Ascomycota	Dothideomycetes	Venturiales	Sympoventuriaceae	Ochroconis	NA
OTU900	0	0	0.00150368	Fungi	Ascomycota	Sordariomycetes	Myrmecridiales	Myrmecridiaceae	Myrmecridium	hiemale
OTU901	0.000307208	0	0.00164038	Fungi	Ascomycota	Sordariomycetes	NA	NA	NA	NA
OTU902	0	0	0.00136698	Fungi	Basidiomycota	Wallemiomycetes	Wallemiales	Wallemiaceae	Wallemia	canadensis
OTU903	0	0.00794439	0.0147634	Fungi	Basidiomycota	Malasseziomycetes	Malasseziales	Malasseziaceae	Malassezia	globosa
OTU904	0	0	0.00136698	Fungi	Ascomycota	Sordariomycetes	Sordariales	Lasiosphaeriaceae	NA	NA
OTU905	0	0	0.00136698	Fungi	Ascomycota	Sordariomycetes	Hypocreales	NA	NA	NA
OTU906	0	0	0.00136698	Fungi	Ascomycota	Sordariomycetes	Hypocreales	Cordycipitaceae	Lecanicillium	psalliotae
OTU907	0	0	0.00136698	Fungi	Basidiomycota	Agaricomycetes	Thelephorales	Thelephoraceae	Tomentellopsis	NA
OTU908	0	0	0.00136698	Fungi	Basidiomycota	Agaricomycetes	Hymenochaetales	Schizoporaceae	Xylodon	sambuci
OTU909	0	0	0.00136698	Fungi	Ascomycota	Eurotiomycetes	Eurotiales	Trichocomaceae	Talaromyces	minioluteus
OTU912	0.00122883	0	0	Fungi	Ascomycota	Sordariomycetes	Microascales	Microascaceae	Kernia	NA
OTU913	0.000768021	0	0	Fungi	Ascomycota	Dothideomycetes	Pleosporales	Leptosphaeriaceae	Leptosphaeria	cirsii
OTU914	0.000691219	0	0	Fungi	Ascomycota	Sordariomycetes	Trichosphaeriales	Trichosphaeriaceae	Nigrospora	bambusae
OTU915	0.000768021	0	0	Fungi	Basidiomycota	Tremellomycetes	Tremellales	NA	NA	NA
OTU916	0.000768021	0	0	Fungi	Basidiomycota	Tremellomycetes	Tremellales	Bulleribasidiaceae	Dioszegia	changbaiensis
OTU917	0.000691219	0	0	Fungi	Mucoromycota	Mucoromycetes	Mucorales	Mucoraceae	Mucor	strictus
OTU919	0.00138244	0	0	Fungi	Ascomycota	Dothideomycetes	Pleosporales	Didymellaceae	Didymella	NA
OTU921	0	0.0357498	0	Fungi	Mucoromycota	Mucoromycetes	Mucorales	Mucoraceae	Actinomucor	elegans
OTU922	0	0	0.000820189	Fungi	Basidiomycota	Agaricomycetes	Hymenochaetales	Schizoporaceae	Schizopora	paradoxa
OTU928	0	0	0.00136698	Fungi	Basidiomycota	Agaricomycetes	Cantharellales	Cantharellales_fam_Incertae_sedis	Sistotrema	NA
OTU930	0	0	0.00123028	Fungi	Ascomycota	Dothideomycetes	Pleosporales	Melanommataceae	NA	NA
OTU932	0	0	0.00123028	Fungi	Ascomycota	Sordariomycetes	Hypocreales	Nectriaceae	Cosmospora	viridescens
OTU933	0	0	0.00109358	Fungi	Ascomycota	Eurotiomycetes	Eurotiales	Trichocomaceae	Talaromyces	NA
OTU934	0	0	0.00123028	Fungi	Ascomycota	Saccharomycetes	Saccharomycetales	Lipomycetaceae	Lipomyces	lipofer
OTU935	0	0	0.00123028	Fungi	Basidiomycota	Agaricomycetes	Polyporales	Meruliaceae	Phlebia	tuberculata
OTU936	0	0	0.00177708	Fungi	Basidiomycota	Agaricomycetes	Auriculariales	Auriculariales_fam_Incertae_sedis	Oliveonia	pauxilla
OTU937	0	0	0.00123028	Fungi	Ascomycota	Eurotiomycetes	Eurotiales	Aspergillaceae	Aspergillus	aureolatus
OTU938	0	0	0.00123028	Fungi	Ascomycota	Dothideomycetes	Pleosporales	Phaeosphaeriaceae	NA	NA
OTU939	0	0	0.00123028	Fungi	Ascomycota	Sordariomycetes	Hypocreales	Hypocreales_fam_Incertae_sedis	Acremonium	blochii
OTU940	0	0	0.00123028	Fungi	Basidiomycota	Agaricostilbomycetes	Agaricostilbales	Kondoaceae	Kondoa	NA
OTU941	0.000230406	0	0.00109358	Fungi	Basidiomycota	Tremellomycetes	Tremellales	Bulleribasidiaceae	Vishniacozyma	dimennae
OTU944	0.000614417	0	0	Fungi	Ascomycota	Dothideomycetes	Pleosporales	Torulaceae	Torula	NA
OTU946	0.000614417	0	0	Fungi	Ascomycota	Dothideomycetes	Pleosporales	Phaeosphaeriaceae	Phaeosphaeria	NA
OTU948	0.000844823	0	0	Fungi	Ascomycota	Dothideomycetes	Pleosporales	Leptosphaeriaceae	Leptosphaeria	cirsii
OTU949	0.000614417	0	0	Fungi	Ascomycota	Leotiomycetes	Helotiales	NA	NA	NA
OTU950	0.000844823	0	0	Fungi	Ascomycota	Leotiomycetes	Helotiales	Helotiaceae	Hymenoscyphus	caudatus
OTU952	0.000921625	0	0	Fungi	Ascomycota	Dothideomycetes	Pleosporales	Leptosphaeriaceae	Leptosphaeria	cirsii
OTU953	0.000921625	0	0	Fungi	Ascomycota	NA	NA	NA	NA	NA
OTU954	0	0.0317776	0	Fungi	Ascomycota	Sordariomycetes	Hypocreales	Hypocreales_fam_Incertae_sedis	Olpitrichum	sphaerosporum
OTU958	0	0	0.00123028	Fungi	Ascomycota	Sordariomycetes	Hypocreales	NA	NA	NA
OTU960	0.000153604	0	0.00123028	Fungi	Ascomycota	Sordariomycetes	Chaetosphaeriales	Chaetosphaeriaceae	Chloridium	aseptatum
OTU962	7.68021e-05	0	0.00164038	Fungi	Ascomycota	Eurotiomycetes	Eurotiales	Aspergillaceae	Penicillium	NA
OTU963	0	0	0.00205047	Fungi	Ascomycota	Dothideomycetes	Venturiales	Sympoventuriaceae	Ochroconis	NA
OTU967	0	0	0.00109358	Fungi	Ascomycota	Sordariomycetes	Sordariales	Lasiosphaeriaceae	Schizothecium	curvisporum
OTU968	0	0	0.00423764	Fungi	Basidiomycota	Agaricostilbomycetes	Agaricostilbales	Chionosphaeraceae	Kurtzmanomyces	NA
OTU969	0	0	0.00123028	Fungi	Basidiomycota	Agaricomycetes	Agaricales	Strophariaceae	Hypholoma	fasciculare
OTU970	0	0	0.00109358	Fungi	Ascomycota	Dothideomycetes	Botryosphaeriales	Botryosphaeriaceae	Lasiodiplodia	NA
OTU972	0	0	0.00109358	Fungi	Ascomycota	Dothideomycetes	Capnodiales	Cladosporiaceae	Cladosporium	ossifragi
OTU973	0	0.019861	0.00109358	Fungi	Basidiomycota	Malasseziomycetes	Malasseziales	Malasseziaceae	Malassezia	arunalokei
OTU974	0.000537615	0	0	Fungi	Ascomycota	Dothideomycetes	Capnodiales	Teratosphaeriaceae	Constantinomyces	nebulosus
OTU978	0.000460813	0	0	Fungi	Basidiomycota	Cystobasidiomycetes	Cystobasidiales	Cystobasidiaceae	Cystobasidium	ritchiei
OTU979	0.000768021	0	0	Fungi	Ascomycota	Dothideomycetes	Venturiales	Sympoventuriaceae	Ochroconis	NA
OTU980	0.000844823	0	0	Fungi	Basidiomycota	Tremellomycetes	Tremellales	Bulleribasidiaceae	Dioszegia	rishiriensis
OTU981	0.000537615	0	0	Fungi	Basidiomycota	Tremellomycetes	Tremellales	Bulleribasidiaceae	Vishniacozyma	globispora
OTU983	0.000460813	0	0	Fungi	Ascomycota	Dothideomycetes	Pleosporales	Leptosphaeriaceae	Leptosphaeria	cirsii
OTU984	0.000844823	0	0	Fungi	Ascomycota	Dothideomycetes	Pleosporales	Leptosphaeriaceae	Leptosphaeria	cirsii
OTU985	0.00168965	0	0	Fungi	Ascomycota	Dothideomycetes	Pleosporales	Leptosphaeriaceae	Leptosphaeria	NA
OTU987	7.68021e-05	0.0278054	0.000136698	Fungi	Mortierellomycota	Mortierellomycetes	Mortierellales	Mortierellaceae	Mortierella	NA
OTU990	7.68021e-05	0.019861	0.000273396	Fungi	Basidiomycota	Agaricomycetes	Russulales	Bondarzewiaceae	Heterobasidion	NA
OTU991	0.000230406	0.0278054	0	Fungi	Ascomycota	Eurotiomycetes	Chaetothyriales	Epibryaceae	Epibryon	interlamellare
OTU992	0	0.0278054	0	Fungi	Ascomycota	Sordariomycetes	Coniochaetales	Coniochaetaceae	Coniochaeta	NA
OTU994	0	0	0.000956887	Fungi	Ascomycota	Pezizomycotina_cls_Incertae_sedis	Pezizomycotina_ord_Incertae_sedis	Pezizomycotina_fam_Incertae_sedis	Hymenula	cerealis
OTU997	0	0	0.00109358	Fungi	Ascomycota	Leotiomycetes	Helotiales	NA	NA	NA
OTU999	0	0	0.00218717	Fungi	Ascomycota	Eurotiomycetes	Eurotiales	Aspergillaceae	Penicillium	simplicissimum
OTU1001	0	0	0.000956887	Fungi	Basidiomycota	Agaricomycetes	Agaricales	Tricholomataceae	Mycena	polygramma
OTU1003	0	0	0.000956887	Fungi	Ascomycota	Sordariomycetes	Sordariales	Lasiosphaeriaceae	NA	NA
OTU1004	0	0	0.000956887	Fungi	Ascomycota	Dothideomycetes	Pleosporales	Phaeosphaeriaceae	Ophiosphaerella	NA
OTU1005	7.68021e-05	0	0.000956887	Fungi	Basidiomycota	Tremellomycetes	Cystofilobasidiales	Mrakiaceae	Udeniomyces	pyricola
OTU1007	0	0	0.000956887	Fungi	Basidiomycota	Microbotryomycetes	Microbotryomycetes_ord_Incertae_sedis	Chrysozymaceae	Udeniozyma	ferulica
OTU1009	0.000153604	0	0.000956887	Fungi	Basidiomycota	Agaricomycetes	Agaricales	NA	NA	NA
OTU1011	0	0.0119166	0.00246057	Fungi	Basidiomycota	Malasseziomycetes	Malasseziales	Malasseziaceae	Malassezia	arunalokei
OTU1012	0	0	0.000956887	Fungi	Basidiomycota	Malasseziomycetes	Malasseziales	Malasseziaceae	Malassezia	sympodialis
OTU1013	0	0	0.000956887	Fungi	Ascomycota	Dothideomycetes	Pleosporales	NA	NA	NA
OTU1022	0.000460813	0	0	Fungi	Ascomycota	Dothideomycetes	Pleosporales	Phaeosphaeriaceae	Dematiopleospora	fusiformis
OTU1023	0.000460813	0	0	Fungi	Chytridiomycota	Spizellomycetes	Spizellomycetales	Powellomycetaceae	Powellomyces	NA
OTU1024	0.000460813	0	0	Fungi	Ascomycota	Dothideomycetes	Myriangiales	Elsinoaceae	NA	NA
OTU1025	0.000460813	0	0	Fungi	Basidiomycota	Agaricomycetes	NA	NA	NA	NA
OTU1026	0.000460813	0	0	Fungi	Basidiomycota	Tremellomycetes	Filobasidiales	Filobasidiaceae	Naganishia	vaughanmartiniae
OTU1027	0.000768021	0	0	Fungi	Ascomycota	Dothideomycetes	Pleosporales	Leptosphaeriaceae	Leptosphaeria	cirsii
OTU1028	0.000460813	0	0	Fungi	Ascomycota	Dothideomycetes	Pleosporales	Phaeosphaeriaceae	Neosetophoma	rosae
OTU1029	0.000460813	0	0	Fungi	Ascomycota	Dothideomycetes	Pleosporales	Leptosphaeriaceae	Leptosphaeria	NA
OTU1030	0.000460813	0	0	Fungi	Ascomycota	Dothideomycetes	Pleosporales	Phaeosphaeriaceae	Dematiopleospora	rosicola
OTU1031	0.000537615	0	0	Fungi	Ascomycota	Dothideomycetes	Pleosporales	Leptosphaeriaceae	Leptosphaeria	cirsii
OTU1032	0.000460813	0	0	Fungi	Ascomycota	Dothideomycetes	Pleosporales	Leptosphaeriaceae	Leptosphaeria	cirsii
OTU1033	0.000460813	0	0	Fungi	Ascomycota	Sordariomycetes	Myrmecridiales	Myrmecridiaceae	Myrmecridium	phragmitis
OTU1034	0.000537615	0	0	Fungi	Basidiomycota	Agaricostilbomycetes	Agaricostilbales	Kondoaceae	Kondoa	changbaiensis
OTU1035	0	0.0238332	0	Fungi	Basidiomycota	Agaricomycetes	Polyporales	Meruliaceae	Scopuloides	hydnoides
OTU1037	0	0.0238332	0	Fungi	Ascomycota	Eurotiomycetes	Eurotiales	Aspergillaceae	Penicillium	NA
OTU1038	0	0	0	Fungi	Ascomycota	NA	NA	NA	NA	NA
OTU1040	7.68021e-05	0.0238332	0	Fungi	Ascomycota	Eurotiomycetes	Chaetothyriales	Cyphellophoraceae	Cyphellophora	sessilis
OTU1043	7.68021e-05	0	0.000820189	Fungi	Basidiomycota	Agaricomycetes	Agaricales	Omphalotaceae	Rhodocollybia	butyracea
OTU1045	0	0	0.000820189	Fungi	Ascomycota	Dothideomycetes	Tubeufiales	Tubeufiaceae	NA	NA
OTU1046	7.68021e-05	0	0.000820189	Fungi	Ascomycota	Sordariomycetes	Xylariales	Microdochiaceae	Microdochium	NA
OTU1047	0	0	0.000820189	Fungi	Ascomycota	Sordariomycetes	Hypocreales	Hypocreaceae	Trichoderma	NA
OTU1048	0.000307208	0	0.000820189	Fungi	Ascomycota	Dothideomycetes	Pleosporales	Phaeosphaeriaceae	Septoriella	hirta
OTU1049	0	0	0.000683491	Fungi	Ascomycota	Leotiomycetes	Thelebolales	Pseudeurotiaceae	Pseudogymnoascus	NA
OTU1050	0	0	0.000820189	Fungi	Basidiomycota	Agaricomycetes	Hymenochaetales	Schizoporaceae	Xylodon	nespori
OTU1052	0	0	0.000683491	Fungi	Ascomycota	Sordariomycetes	Myrmecridiales	Myrmecridiaceae	Myrmecridium	phragmitis
OTU1055	0	0	0.000956887	Fungi	Ascomycota	Saccharomycetes	Saccharomycetales	Debaryomycetaceae	Debaryomyces	hansenii
OTU1057	0.00038401	0	0	Fungi	Ascomycota	Dothideomycetes	Pleosporales	Phaeosphaeriaceae	Phaeosphaeria	NA
OTU1058	0.00038401	0	0	Fungi	Ascomycota	Dothideomycetes	Capnodiales	Capnodiales_fam_Incertae_sedis	Arthrocatena	NA
OTU1059	0.000614417	0	0	Fungi	Ascomycota	Dothideomycetes	Capnodiales	Extremaceae	NA	NA
OTU1061	0.000844823	0	0	Fungi	Ascomycota	Dothideomycetes	Pleosporales	Phaeosphaeriaceae	Neosetophoma	samararum
OTU1062	0.000460813	0	0	Fungi	Ascomycota	Dothideomycetes	Pleosporales	NA	NA	NA
OTU1063	0.00038401	0	0	Fungi	Basidiomycota	Agaricomycetes	NA	NA	NA	NA
OTU1064	0.000768021	0	0	Fungi	Ascomycota	Dothideomycetes	Pleosporales	Leptosphaeriaceae	Leptosphaeria	cirsii
OTU1069	0.00038401	0	0	Fungi	Basidiomycota	Microbotryomycetes	Microbotryomycetes_ord_Incertae_sedis	Chrysozymaceae	Sampaiozyma	ingeniosa
OTU1070	0.000537615	0	0	Fungi	Ascomycota	Sordariomycetes	Hypocreales	Nectriaceae	Stylonectria	purtonii
OTU1071	0.000460813	0	0	Fungi	Basidiomycota	Exobasidiomycetes	Entylomatales	NA	NA	NA
OTU1072	0.000460813	0	0	Fungi	Ascomycota	Dothideomycetes	Pleosporales	Leptosphaeriaceae	Leptosphaeria	NA
OTU1073	0.000307208	0	0	Fungi	Ascomycota	Dothideomycetes	Pleosporales	Leptosphaeriaceae	Leptosphaeria	cirsii
OTU1085	0	0	0.000683491	Fungi	Basidiomycota	Agaricomycetes	Agaricales	Bolbitiaceae	Conocybe	zeylanica
OTU1089	0	0	0.000683491	Fungi	Basidiomycota	Cystobasidiomycetes	Cystobasidiales	Cystobasidiaceae	Occultifur	NA
OTU1093	0	0	0.000683491	Fungi	Basidiomycota	Microbotryomycetes	Microbotryomycetes_ord_Incertae_sedis	Chrysozymaceae	NA	NA
OTU1095	0	0	0.000683491	Fungi	Basidiomycota	Agaricomycetes	Polyporales	Polyporales_fam_Incertae_sedis	Climacocystis	borealis
OTU1096	0	0	0.000683491	Fungi	Basidiomycota	Agaricomycetes	NA	NA	NA	NA
OTU1097	0	0	0.000683491	Fungi	Ascomycota	Sordariomycetes	Hypocreales	NA	NA	NA
OTU1098	0	0	0.000683491	Fungi	Basidiomycota	Agaricomycetes	Agaricales	Tricholomataceae	Mycena	olivaceomarginata
OTU1099	0.00038401	0	0.000546792	Fungi	Ascomycota	Sordariomycetes	Hypocreales	Nectriaceae	Fusicolla	septimanifiniscientiae
OTU1100	0	0	0.000683491	Fungi	Basidiomycota	Agaricomycetes	Polyporales	Fomitopsidaceae	Phaeolus	schweinitzii
OTU1102	0	0	0.000683491	Fungi	Basidiomycota	Agaricomycetes	Agaricales	Strophariaceae	Pholiota	conissans
OTU1104	0.000307208	0	0	Fungi	Ascomycota	Sordariomycetes	Sordariales	Chaetomiaceae	NA	NA
OTU1105	0.000307208	0	0	Fungi	Ascomycota	NA	NA	NA	NA	NA
OTU1109	0.00038401	0	0	Fungi	Ascomycota	Dothideomycetes	Capnodiales	Teratosphaeriaceae	NA	NA
OTU1112	0.000307208	0	0	Fungi	Basidiomycota	Agaricomycetes	Cantharellales	NA	NA	NA
OTU1113	0.00038401	0	0	Fungi	Basidiomycota	Agaricomycetes	Agaricales	Agaricales_fam_Incertae_sedis	Uncobasidium	NA
OTU1115	0.000537615	0	0	Fungi	Ascomycota	Dothideomycetes	Pleosporales	Leptosphaeriaceae	Leptosphaeria	NA
OTU1116	0.000691219	0	0.000273396	Fungi	Ascomycota	Leotiomycetes	Helotiales	Helotiales_fam_Incertae_sedis	Cadophora	luteo-olivacea
OTU1117	0.000307208	0	0	Fungi	Ascomycota	Leotiomycetes	Helotiales	Helotiaceae	Infundichalara	NA
OTU1118	0.000307208	0	0	Fungi	Basidiomycota	Agaricomycetes	Agaricales	Lycoperdaceae	Lycoperdon	NA
OTU1119	0.000307208	0	0	Fungi	Ascomycota	Dothideomycetes	Pleosporales	Leptosphaeriaceae	Leptosphaeria	NA
OTU1120	0.000691219	0	0	Fungi	Ascomycota	Dothideomycetes	Pleosporales	Leptosphaeriaceae	Leptosphaeria	cirsii
OTU1121	0.00038401	0	0	Fungi	Ascomycota	Dothideomycetes	Pleosporales	Leptosphaeriaceae	Leptosphaeria	cirsii
OTU1122	0.000307208	0	0	Fungi	Ascomycota	Sordariomycetes	Hypocreales	NA	NA	NA
OTU1123	0.000307208	0	0	Fungi	Ascomycota	Dothideomycetes	Capnodiales	Mycosphaerellaceae	Ramularia	NA
OTU1124	0.00038401	0	0	Fungi	Basidiomycota	Agaricomycetes	Agaricales	Typhulaceae	Typhula	variabilis
OTU1125	0.00038401	0	0	Fungi	Basidiomycota	Microbotryomycetes	Sporidiobolales	Sporidiobolaceae	Rhodotorula	graminis
OTU1126	0.000307208	0	0	Fungi	Ascomycota	Dothideomycetes	Venturiales	Sympoventuriaceae	Ochroconis	NA
OTU1127	0.000307208	0	0	Fungi	Ascomycota	Dothideomycetes	Pleosporales	Leptosphaeriaceae	Leptosphaeria	cirsii
OTU1128	0.000537615	0	0	Fungi	Ascomycota	Dothideomycetes	Pleosporales	Leptosphaeriaceae	Leptosphaeria	cirsii
OTU1129	0.000307208	0	0	Fungi	Ascomycota	Sordariomycetes	Hypocreales	Cordycipitaceae	Beauveria	bassiana
OTU1130	0.00038401	0	0	Fungi	Basidiomycota	Cystobasidiomycetes	Cystobasidiales	Cystobasidiaceae	Cystobasidium	NA
OTU1131	0.000307208	0	0	Fungi	Basidiomycota	Agaricomycetes	Agaricales	Lycoperdaceae	Lycoperdon	pratense
OTU1132	0.000307208	0	0	Fungi	Ascomycota	Dothideomycetes	Pleosporales	Leptosphaeriaceae	Leptosphaeria	NA
OTU1133	0.000768021	0	0	Fungi	Ascomycota	Dothideomycetes	Pleosporales	Leptosphaeriaceae	Leptosphaeria	NA
OTU1134	0.000537615	0	0	Fungi	Ascomycota	Dothideomycetes	Pleosporales	Leptosphaeriaceae	Leptosphaeria	cirsii
OTU1135	0.000307208	0	0	Fungi	Ascomycota	Dothideomycetes	Pleosporales	Leptosphaeriaceae	Leptosphaeria	cirsii
OTU1136	0.000230406	0	0	Fungi	Ascomycota	Dothideomycetes	Pleosporales	Lophiostomataceae	Platystomum	crataegi
OTU1137	0.00038401	0	0	Fungi	Ascomycota	Dothideomycetes	Pleosporales	Leptosphaeriaceae	Leptosphaeria	cirsii
OTU1138	0.000153604	0	0	Fungi	Ascomycota	Leotiomycetes	Helotiales	Hyaloscyphaceae	Pezizella	NA
OTU1139	0.000307208	0	0	Fungi	Basidiomycota	Microbotryomycetes	Sporidiobolales	Sporidiobolaceae	Rhodosporidiobolus	oreadorum
OTU1141	7.68021e-05	0.0158888	0	Fungi	Basidiomycota	Cystobasidiomycetes	Cystobasidiomycetes_ord_Incertae_sedis	Buckleyzymaceae	Buckleyzyma	aurantiaca
OTU1145	0	0	0	Fungi	Ascomycota	Dothideomycetes	NA	NA	NA	NA
OTU1148	0	0.0158888	0	Fungi	Ascomycota	NA	NA	NA	NA	NA
OTU1149	7.68021e-05	0.019861	0	Fungi	Ascomycota	Dothideomycetes	Pleosporales	NA	NA	NA
OTU1152	0	0	0.000546792	Fungi	Basidiomycota	Agaricomycetes	Agaricales	Psathyrellaceae	Coprinellus	sclerocystidiosus
OTU1153	0	0	0.000546792	Fungi	Basidiomycota	Agaricostilbomycetes	Agaricostilbales	Kondoaceae	Kondoa	changbaiensis
OTU1154	0	0	0.000546792	Fungi	Basidiomycota	Agaricomycetes	Trechisporales	Trechisporales_fam_Incertae_sedis	Sistotremastrum	guttuliferum
OTU1155	0	0	0.000546792	Fungi	Basidiomycota	Agaricomycetes	Polyporales	Steccherinaceae	Steccherinum	ochraceum
OTU1156	0	0	0.000546792	Fungi	Mortierellomycota	Mortierellomycetes	Mortierellales	Mortierellaceae	Mortierella	hyalina
OTU1162	0.000307208	0	0.000546792	Fungi	Ascomycota	Dothideomycetes	Venturiales	Sympoventuriaceae	Ochroconis	NA
OTU1165	0	0	0.000546792	Fungi	Ascomycota	Sordariomycetes	Xylariales	Xylariales_fam_Incertae_sedis	Neoidriella	desertorum
OTU1167	7.68021e-05	0	0.000546792	Fungi	Ascomycota	Dothideomycetes	Pleosporales	Didymosphaeriaceae	Pseudopithomyces	rosae
OTU1170	0	0	0.000546792	Fungi	Ascomycota	Eurotiomycetes	Chaetothyriales	Herpotrichiellaceae	Cladophialophora	modesta
OTU1171	0	0	0.000546792	Fungi	Ascomycota	Dothideomycetes	Pleosporales	Leptosphaeriaceae	Plenodomus	biglobosus
OTU1172	7.68021e-05	0	0.000956887	Fungi	Ascomycota	Eurotiomycetes	Eurotiales	Aspergillaceae	Penicillium	NA
OTU1176	0.000230406	0	0	Fungi	Basidiomycota	Tremellomycetes	Tremellales	Bulleribasidiaceae	Dioszegia	changbaiensis
OTU1177	0.000230406	0	0	Fungi	Ascomycota	Sordariomycetes	Diaporthales	Gnomoniaceae	Plagiostoma	aesculi
OTU1178	0.000230406	0	0	Fungi	Basidiomycota	Microbotryomycetes	Microbotryales	Microbotryaceae	NA	NA
OTU1179	0.000307208	0	0	Fungi	Ascomycota	Eurotiomycetes	Chaetothyriales	Herpotrichiellaceae	Rhinocladiella	NA
OTU1180	0.000230406	0	0	Fungi	Ascomycota	Dothideomycetes	Capnodiales	Capnodiales_fam_Incertae_sedis	Hispidoconidioma	alpinum
OTU1182	0.000230406	0	0	Fungi	Ascomycota	Dothideomycetes	Dothideales	Dothioraceae	Pringsheimia	smilacis
OTU1183	0.000230406	0	0	Fungi	Basidiomycota	Tremellomycetes	Tremellales	NA	NA	NA
OTU1184	0.000153604	0	0	Fungi	Ascomycota	Dothideomycetes	Pleosporales	Leptosphaeriaceae	Leptosphaeria	cirsii
OTU1187	0.000307208	0	0	Fungi	Ascomycota	Dothideomycetes	Pleosporales	Leptosphaeriaceae	Leptosphaeria	cirsii
OTU1190	0.000230406	0	0	Fungi	Ascomycota	Dothideomycetes	Pleosporales	Pleosporales_fam_Incertae_sedis	Massariosphaeria	roumeguerei
OTU1191	0.000307208	0	0	Fungi	Basidiomycota	Cystobasidiomycetes	Cystobasidiomycetes_ord_Incertae_sedis	Symmetrosporaceae	Symmetrospora	coprosmae
OTU1194	0.000230406	0	0	Fungi	Ascomycota	Dothideomycetes	Pleosporales	Phaeosphaeriaceae	Pseudoophiobolus	italicus
OTU1195	0.000230406	0	0	Fungi	Ascomycota	Pezizomycetes	Pezizales	Discinaceae	Gyromitra	infula
OTU1196	0.00038401	0	0	Fungi	Ascomycota	Leotiomycetes	Helotiales	Helotiales_fam_Incertae_sedis	Chalara	recta
OTU1197	0.00038401	0	0	Fungi	Ascomycota	Dothideomycetes	Capnodiales	Extremaceae	NA	NA
OTU1198	0.000230406	0	0	Fungi	Basidiomycota	Tremellomycetes	Tremellales	NA	NA	NA
OTU1199	0.000230406	0	0	Fungi	Basidiomycota	Agaricomycetes	Agaricales	Psathyrellaceae	Coprinellus	disseminatus
OTU1203	0.000230406	0	0	Fungi	Ascomycota	Dothideomycetes	Pleosporales	Leptosphaeriaceae	Leptosphaeria	cirsii
OTU1204	0.000230406	0	0	Fungi	Basidiomycota	Tremellomycetes	Tremellales	Bulleraceae	Bullera	unica
OTU1205	0.000230406	0	0	Fungi	Basidiomycota	Agaricostilbomycetes	Agaricostilbales	Kondoaceae	Kondoa	sorbi
OTU1206	0.000230406	0	0	Fungi	Ascomycota	Dothideomycetes	Pleosporales	Sporormiaceae	NA	NA
OTU1210	0	0.0119166	0	Fungi	Ascomycota	Dothideomycetes	Pleosporales	Massarinaceae	Helminthosporium	NA
OTU1211	0	0.0119166	0	Fungi	Basidiomycota	NA	NA	NA	NA	NA
OTU1214	0	0.0119166	0	Fungi	Ascomycota	Leotiomycetes	Helotiales	Myxotrichaceae	Oidiodendron	NA
OTU1216	0	0.0119166	0	Fungi	Ascomycota	Dothideomycetes	Capnodiales	NA	NA	NA
OTU1219	0	0	0.000410094	Fungi	Basidiomycota	Agaricomycetes	Agaricales	Tricholomataceae	Panellus	mitis
OTU1223	0	0	0.000410094	Fungi	Basidiomycota	Agaricomycetes	Agaricales	Tricholomataceae	Mycena	vulgaris
OTU1224	0	0	0.000410094	Fungi	Rozellomycota	NA	NA	NA	NA	NA
OTU1225	0	0	0.000410094	Fungi	Basidiomycota	Agaricomycetes	Agaricales	Tricholomataceae	Clitocybe	ditopa
OTU1226	0	0	0.000410094	Fungi	Chytridiomycota	NA	NA	NA	NA	NA
OTU1228	0.000230406	0	0	Fungi	Ascomycota	Dothideomycetes	Venturiales	Sympoventuriaceae	Ochroconis	NA
OTU1229	0.000153604	0	0	Fungi	Basidiomycota	Spiculogloeomycetes	Spiculogloeales	Spiculogloeaceae	Phyllozyma	NA
OTU1230	0.000230406	0	0	Fungi	Basidiomycota	Cystobasidiomycetes	Cystobasidiales	Cystobasidiaceae	Occultifur	NA
OTU1231	0.000153604	0	0	Fungi	Basidiomycota	Tremellomycetes	Tremellales	Tremellaceae	Tremella	phaeophysciae
OTU1232	0.000153604	0	0	Fungi	Ascomycota	Sordariomycetes	Xylariales	Xylariaceae	Hypoxylon	fuscum
OTU1233	0.000153604	0	0	Fungi	Ascomycota	Dothideomycetes	Acrospermales	Acrospermaceae	Oomyces	carneoalbus
OTU1234	0.000153604	0	0	Fungi	Ascomycota	Dothideomycetes	NA	NA	NA	NA
OTU1236	0.000307208	0	0	Fungi	Ascomycota	Sordariomycetes	Hypocreales	Hypocreaceae	Trichoderma	NA
OTU1239	0.00038401	0	0	Fungi	Ascomycota	Dothideomycetes	Capnodiales	Extremaceae	Saxophila	tyrrhenica
OTU1242	0.000307208	0	0	Fungi	Ascomycota	Dothideomycetes	Pleosporales	Lophiostomataceae	Sigarispora	arundinis
OTU1243	0.000153604	0	0	Fungi	Basidiomycota	Cystobasidiomycetes	Erythrobasidiales	NA	NA	NA
OTU1245	0.000153604	0	0	Fungi	Basidiomycota	Tremellomycetes	Tremellales	NA	NA	NA
OTU1246	0.000230406	0	0	Fungi	Ascomycota	Dothideomycetes	NA	NA	NA	NA
OTU1247	0.000537615	0	0	Fungi	Ascomycota	Leotiomycetes	Thelebolales	Thelebolaceae	Thelebolus	spongiae
OTU1248	0.000153604	0	0	Fungi	Basidiomycota	Tremellomycetes	Tremellales	Tremellaceae	Cryptococcus	NA
OTU1249	0.000153604	0	0	Fungi	Basidiomycota	Agaricomycetes	Agaricales	Psathyrellaceae	Coprinopsis	fluvialis
OTU1250	0.000153604	0	0	Fungi	Basidiomycota	Agaricomycetes	Agaricales	Strophariaceae	Stropharia	hornemannii
OTU1252	0.000153604	0	0	Fungi	Ascomycota	Dothideomycetes	Pleosporales	Sporormiaceae	Preussia	octomera
OTU1255	0.000153604	0	0	Fungi	Ascomycota	Dothideomycetes	Pleosporales	Periconiaceae	Periconia	pseudobyssoides
OTU1256	0.000153604	0.00397219	0	Fungi	Ascomycota	Dothideomycetes	Pleosporales	Phaeosphaeriaceae	Setophoma	terrestris
OTU1257	0.000153604	0	0	Fungi	Ascomycota	Dothideomycetes	Pleosporales	Sporormiaceae	Sporormiella	leporina
OTU1258	0.000153604	0	0	Fungi	Ascomycota	Sordariomycetes	Microascales	Microascales_fam_Incertae_sedis	Wardomyces	inflatus
OTU1259	0.000153604	0	0	Fungi	Ascomycota	Dothideomycetes	Capnodiales	Mycosphaerellaceae	Zymoseptoria	NA
OTU1260	0.000153604	0	0	Fungi	Ascomycota	Sordariomycetes	Sordariales	Chaetomiaceae	Chaetomium	iranianum
OTU1261	0.000307208	0	0	Fungi	Ascomycota	Leotiomycetes	Helotiales	NA	NA	NA
OTU1262	0.000153604	0	0	Fungi	Ascomycota	Dothideomycetes	Capnodiales	Teratosphaeriaceae	NA	NA
OTU1263	0.000153604	0	0	Fungi	Basidiomycota	Agaricomycetes	Russulales	Peniophoraceae	Peniophora	cinerea
OTU1264	0.000153604	0	0	Fungi	Basidiomycota	Agaricomycetes	Polyporales	Meruliaceae	Merulius	tremellosus
OTU1265	0.000153604	0	0	Fungi	Basidiomycota	Agaricomycetes	Agaricales	Psathyrellaceae	Parasola	NA
OTU1266	0.000230406	0	0	Fungi	Basidiomycota	Agaricomycetes	Agaricales	Strophariaceae	Hypholoma	subericaeum
OTU1267	0.000153604	0	0	Fungi	Ascomycota	Dothideomycetes	Pleosporales	NA	NA	NA
OTU1268	0.000153604	0	0	Fungi	Ascomycota	Dothideomycetes	Pleosporales	NA	Pseudolophiotrema	elymicola
OTU1274	7.68021e-05	0.00794439	0	Fungi	Ascomycota	Dothideomycetes	Capnodiales	Teratosphaeriaceae	Apenidiella	strumelloidea
OTU1277	0	0.00794439	0	Fungi	Basidiomycota	Agaricomycetes	Polyporales	Fomitopsidaceae	Cartilosoma	rene-hentic
OTU1281	0	0	0.00218717	Fungi	Basidiomycota	Agaricostilbomycetes	Agaricostilbales	Chionosphaeraceae	NA	NA
OTU1288	0	0	0.000273396	Fungi	Basidiomycota	Agaricomycetes	Agaricales	Pleurotaceae	Pleurotus	pulmonarius
OTU1289	7.68021e-05	0	0.000273396	Fungi	Basidiomycota	Agaricomycetes	Agaricales	Lycoperdaceae	Lycoperdon	pyriforme
OTU1290	0	0	0.000273396	Fungi	Basidiomycota	Classiculomycetes	Classiculales	Classiculaceae	NA	NA
OTU1291	0	0	0.000410094	Fungi	Ascomycota	Sordariomycetes	Hypocreales	Cordycipitaceae	Lecanicillium	primulinum
OTU1292	0	0	0.000273396	Fungi	Basidiomycota	Microbotryomycetes	Sporidiobolales	Sporidiobolaceae	Rhodotorula	dairenensis
OTU1293	7.68021e-05	0	0.000410094	Fungi	Ascomycota	Dothideomycetes	Microthyriales	NA	NA	NA
OTU1295	0	0	0.000273396	Fungi	Ascomycota	Sordariomycetes	Myrmecridiales	Myrmecridiaceae	Myrmecridium	pulvericola

## Sheet: Table S5
Table S5: Absolute abundance (number of reads corresponding to V4 region of 16S rRNA gene) of bacterial ASVs in the samples of winter rye plants
Samples of green leaves (S106, S109, S111, S112, S114, S115, S116)
Samples of desiccated leaves (S202, S204, S205, S206, S207, S211, S212, S214, S216)
Samples of roots (S301, S302, S304, S305,S306, S307, S308, S310, S311, S313, S314, S315, S316)
ASV ID	S106	S109	S111	S112	S114	S115	S116	S202	S204	S205	S206	S207	S211	S212	S214	S216	S301	S302	S304	S305	S306	S307	S308	S310	S311	S313	S314	S315	S316	Kingdom	Phylum	Class	Order	Family	Genus
ASV_3	1080	1292	780	2725	1623	5892	3440	1688	6121	727	52	2	0	1844	40	2	7	3	0	0	2	7	6	6	15	21	74	5	0	Bacteria	Proteobacteria	Gammaproteobacteria	Pseudomonadales	Pseudomonadaceae	Pseudomonas
ASV_4	2681	1473	130	883	2099	2107	239	125	0	2067	232	18	0	22	0	44	4	9	0	1004	11	1030	613	9	20	39	364	52	563	Bacteria	Bacteroidetes	Sphingobacteriia	Sphingobacteriales	Sphingobacteriaceae	Pedobacter
ASV_5	1040	1037	402	972	1070	988	574	665	14	55	905	139	3	32	51	87	134	405	166	107	43	163	67	625	1409	676	980	1087	573	Bacteria	Actinobacteria	Actinobacteria	Actinomycetales	Microbacteriaceae	Cryobacterium
ASV_6	44	18	0	14	0	3	1	9	0	0	0	0	0	0	0	0	330	406	248	411	808	197	2280	631	381	371	933	862	924	Bacteria	Proteobacteria	Alphaproteobacteria	Rhizobiales	Rhizobiaceae	Rhizobium
ASV_7	1028	109	1395	1340	98	586	993	1592	0	14	52	0	0	973	0	3	28	82	14	8	0	130	11	0	2	2	84	7	36	Bacteria	Bacteroidetes	Sphingobacteriia	Sphingobacteriales	Sphingobacteriaceae	Pedobacter
ASV_8	100	2591	219	2537	69	1864	2	1	255	50	176	0	0	0	5	0	3	36	1	9	2	0	1	2	5	1	26	2	0	Bacteria	Proteobacteria	Gammaproteobacteria	Pseudomonadales	Pseudomonadaceae	Pseudomonas
ASV_9	970	825	355	355	803	602	404	16	32	28	838	10	11	10	62	33	45	64	84	30	32	70	98	139	219	129	286	332	161	Bacteria	Actinobacteria	Actinobacteria	Actinomycetales	Microbacteriaceae	unclassified_Microbacteriaceae
ASV_10	0	0	0	0	0	0	0	0	0	0	0	0	0	0	0	0	172	398	2956	362	562	254	1909	83	77	45	179	25	28	Bacteria	Actinobacteria	Actinobacteria	Actinomycetales	Promicromonosporaceae	Promicromonospora
ASV_11	0	0	0	0	0	0	0	73	0	0	0	0	0	0	0	0	607	329	589	432	831	974	1752	62	65	42	223	126	933	Bacteria	Proteobacteria	Alphaproteobacteria	Rhizobiales	Rhizobiaceae	Rhizobium
ASV_12	0	0	0	0	0	0	0	0	0	0	0	0	0	0	0	0	1000	579	119	1136	513	1232	744	84	46	212	252	221	661	Bacteria	Proteobacteria	Alphaproteobacteria	Rhizobiales	Phyllobacteriaceae	Phyllobacterium
ASV_13	457	404	913	134	79	16	364	158	0	0	0	0	0	0	12	0	0	179	0	0	2	0	0	10	7	14	143	38	3703	Bacteria	Bacteroidetes	Sphingobacteriia	Sphingobacteriales	Sphingobacteriaceae	Pedobacter
ASV_14	72	354	192	179	153	246	147	32	5	33	21	42	32	17	303	34	259	165	576	204	328	328	781	171	518	234	231	334	262	Bacteria	Actinobacteria	Actinobacteria	Actinomycetales	Micrococcaceae	Arthrobacter
ASV_15	35	19	5	11	8	4	4	0	0	0	0	0	0	0	4	0	671	632	295	465	763	534	656	112	121	341	344	599	654	Bacteria	Proteobacteria	Alphaproteobacteria	Rhizobiales	Hyphomicrobiaceae	Devosia
ASV_16	118	284	190	502	31	338	38	54	0	30	119	86	0	3	76	33	86	148	5	292	85	687	425	25	19	146	1200	250	465	Bacteria	Proteobacteria	Alphaproteobacteria	Sphingomonadales	Sphingomonadaceae	Sphingomonas
ASV_17	33	331	1006	245	639	2407	95	0	0	6	0	0	0	2	0	0	1	0	0	2	0	2	0	4	3	54	27	9	5	Bacteria	Proteobacteria	Betaproteobacteria	Burkholderiales	Oxalobacteraceae	Janthinobacterium
ASV_18	193	334	153	184	133	227	304	61	0	140	30	125	11	24	321	33	171	114	269	118	186	166	384	194	374	165	141	237	258	Bacteria	Actinobacteria	Actinobacteria	Actinomycetales	Micrococcaceae	Arthrobacter
ASV_19	302	1085	124	99	0	33	721	17	2779	0	71	0	0	0	0	36	0	0	3	6	0	2	0	0	0	0	0	0	0	Bacteria	Proteobacteria	Gammaproteobacteria	Pseudomonadales	Pseudomonadaceae	Pseudomonas
ASV_20	0	0	0	0	0	0	0	0	0	0	0	0	0	0	0	0	286	842	31	553	1935	335	268	4	11	148	255	235	86	Bacteria	Proteobacteria	Betaproteobacteria	Burkholderiales	Comamonadaceae	Polaromonas
ASV_21	1222	273	96	1565	506	320	55	0	13	0	14	3	0	6	18	41	13	5	0	0	0	1	0	0	3	0	9	11	7	Bacteria	Firmicutes	Bacilli	Bacillales	Planococcaceae	Sporosarcina
ASV_22	734	621	621	411	407	373	307	50	20	60	23	98	0	3	41	0	2	46	4	0	0	7	6	0	12	4	6	0	11	Bacteria	Actinobacteria	Actinobacteria	Actinomycetales	Microbacteriaceae	unclassified_Microbacteriaceae
ASV_23	0	0	0	0	3	0	0	0	0	0	0	0	0	0	0	0	200	1239	33	317	1246	244	246	4	11	82	215	85	72	Bacteria	Proteobacteria	Betaproteobacteria	Burkholderiales	Comamonadaceae	Polaromonas
ASV_24	29	612	362	148	962	226	28	28	282	0	0	0	0	0	0	0	1026	65	0	138	11	1	4	2	3	0	13	17	0	Bacteria	Proteobacteria	Gammaproteobacteria	Pseudomonadales	Pseudomonadaceae	Pseudomonas
ASV_25	15	40	28	22	18	42	41	0	0	28	0	29	0	7	0	0	125	166	510	294	88	173	390	776	487	319	90	68	177	Bacteria	Actinobacteria	Actinobacteria	Actinomycetales	Mycobacteriaceae	Mycobacterium
ASV_26	33	238	226	27	37	2099	52	0	0	0	0	1	0	0	0	0	0	18	0	0	261	0	0	1	0	78	309	393	27	Bacteria	Bacteroidetes	Flavobacteriia	Flavobacteriales	Flavobacteriaceae	Flavobacterium
ASV_27	316	88	268	48	492	306	2122	29	100	0	0	0	0	0	0	0	0	0	0	0	0	0	0	0	0	0	0	0	0	Bacteria	Proteobacteria	Gammaproteobacteria	Pseudomonadales	Pseudomonadaceae	Pseudomonas
ASV_28	21	20	0	20	22	7	7	0	0	0	19	0	0	0	0	0	250	226	206	166	339	187	265	287	340	169	344	353	188	Bacteria	Actinobacteria	Actinobacteria	Actinomycetales	Microbacteriaceae	unclassified_Microbacteriaceae
ASV_29	4	161	11	10	922	2154	0	0	0	0	1	5	0	0	0	0	3	0	0	0	0	26	0	4	1	48	10	5	0	Bacteria	Bacteroidetes	Sphingobacteriia	Sphingobacteriales	Sphingobacteriaceae	Pedobacter
ASV_30	19	12	0	7	12	4	7	0	0	0	0	0	0	0	0	0	287	115	349	147	250	195	548	181	226	186	142	323	170	Bacteria	Actinobacteria	Actinobacteria	Actinomycetales	Nocardioidaceae	Aeromicrobium
ASV_31	7	55	6	8	6	11	3	0	0	0	0	14	0	0	0	0	9	154	11	1349	190	118	70	25	89	70	758	43	103	Bacteria	Proteobacteria	Alphaproteobacteria	Rhizobiales	Rhizobiaceae	unclassified_Rhizobiaceae
ASV_33	0	6	9	9	0	0	0	24	0	0	0	0	0	0	0	0	257	388	54	332	267	37	301	67	68	141	169	170	216	Bacteria	Proteobacteria	Betaproteobacteria	Burkholderiales	Comamonadaceae	Variovorax
ASV_34	10	0	0	0	0	0	0	0	0	0	0	0	0	0	0	0	143	158	119	174	194	373	349	76	48	164	141	274	284	Bacteria	Proteobacteria	Alphaproteobacteria	Rhizobiales	Rhizobiaceae	Rhizobium
ASV_35	8	0	782	0	8	2	0	30	12	9	0	0	0	0	0	0	0	0	0	1139	408	25	8	0	4	5	0	14	0	Bacteria	Proteobacteria	Gammaproteobacteria	Pseudomonadales	Pseudomonadaceae	Pseudomonas
ASV_36	152	345	143	670	65	205	30	544	0	0	45	0	0	0	34	11	0	32	0	0	0	0	5	1	0	0	12	4	2	Bacteria	Bacteroidetes	Sphingobacteriia	Sphingobacteriales	Sphingobacteriaceae	Pedobacter
ASV_37	0	0	0	0	0	0	0	0	0	0	0	0	0	0	0	0	274	95	224	46	204	113	249	194	400	107	102	274	74	Bacteria	Actinobacteria	Actinobacteria	Actinomycetales	unclassified_Actinomycetales	unclassified_Actinomycetales
ASV_38	0	5	0	0	2	0	5	0	0	0	0	8	0	0	0	0	245	59	221	131	276	223	408	126	163	70	86	150	157	Bacteria	Actinobacteria	Actinobacteria	Actinomycetales	Nocardioidaceae	Nocardioides
ASV_39	197	81	81	82	80	100	93	25	4	34	165	38	0	32	0	526	96	68	18	7	15	28	18	21	26	50	34	48	45	Bacteria	Actinobacteria	Actinobacteria	Actinomycetales	Nocardiaceae	Rhodococcus
ASV_40	3	4	3	0	5	0	4	0	0	0	0	0	3	0	13	0	315	137	339	69	180	156	242	259	183	77	80	61	127	Bacteria	Actinobacteria	Actinobacteria	Actinomycetales	unclassified_Actinomycetales	unclassified_Actinomycetales
ASV_41	0	0	0	0	1	0	0	0	0	0	0	0	0	0	0	0	48	536	48	131	925	209	147	2	7	34	63	45	39	Bacteria	Proteobacteria	Betaproteobacteria	Burkholderiales	Comamonadaceae	unclassified_Comamonadaceae
ASV_42	0	60	1974	5	46	18	15	0	0	0	0	0	0	0	0	0	0	9	0	0	0	0	0	0	0	4	24	28	0	Bacteria	Bacteroidetes	Sphingobacteriia	Sphingobacteriales	Sphingobacteriaceae	Pedobacter
ASV_43	13	17	0	16	9	10	17	0	0	12	0	10	0	0	0	0	123	49	228	53	103	117	214	216	400	152	104	154	114	Bacteria	Actinobacteria	Actinobacteria	Actinomycetales	Intrasporangiaceae	Phycicoccus
ASV_44	0	146	824	358	153	29	187	0	0	0	0	0	0	0	0	200	0	0	0	0	0	0	0	1	9	4	33	10	2	Bacteria	Actinobacteria	Actinobacteria	Actinomycetales	Micrococcaceae	Arthrobacter
ASV_45	0	1	0	0	0	0	0	0	0	0	0	0	0	0	0	0	114	74	10	329	107	401	292	5	10	92	218	161	86	Bacteria	Proteobacteria	Alphaproteobacteria	Sphingomonadales	Sphingomonadaceae	Sphingobium
ASV_46	12	19	0	80	0	8	15	0	0	7	0	18	0	0	0	20	191	165	128	199	278	73	136	257	76	5	15	11	145	Bacteria	Actinobacteria	Actinobacteria	Actinomycetales	Nocardiaceae	Rhodococcus
ASV_47	5	292	250	107	69	974	5	0	0	1	4	0	0	0	63	0	0	0	3	3	1	4	6	2	0	5	19	15	0	Bacteria	Proteobacteria	Gammaproteobacteria	Pseudomonadales	Pseudomonadaceae	Pseudomonas
ASV_48	6	4	0	4	3	0	0	0	0	5	0	0	0	0	0	0	1	252	14	28	144	65	184	18	20	316	357	169	264	Bacteria	Proteobacteria	Alphaproteobacteria	Sphingomonadales	Sphingomonadaceae	unclassified_Sphingomonadaceae
ASV_49	1	61	2	5	0	9	0	0	0	0	0	0	0	0	7	0	0	4	5	21	4	169	1446	4	0	6	80	7	7	Bacteria	Proteobacteria	Gammaproteobacteria	Xanthomonadales	Xanthomonadaceae	Stenotrophomonas
ASV_50	0	3	0	4	6	0	4	0	0	0	0	0	0	0	0	0	159	109	70	75	199	175	183	32	37	155	157	281	152	Bacteria	Proteobacteria	Alphaproteobacteria	Rhizobiales	Hyphomicrobiaceae	Devosia
ASV_51	0	0	0	0	0	0	0	0	246	6	4	930	0	2	22	11	2	5	0	3	1	0	0	0	0	0	1	0	542	Bacteria	Proteobacteria	Gammaproteobacteria	Pseudomonadales	Moraxellaceae	Enhydrobacter
ASV_52	126	107	49	40	142	66	68	29	0	13	0	0	0	0	0	0	27	168	117	117	46	17	91	111	91	76	73	52	67	Bacteria	Actinobacteria	Actinobacteria	Actinomycetales	Microbacteriaceae	unclassified_Microbacteriaceae
ASV_53	4	11	0	11	16	10	24	0	0	0	0	0	0	0	45	0	42	63	66	24	34	41	38	254	464	251	60	164	147	Bacteria	Actinobacteria	Actinobacteria	Actinomycetales	Streptomycetaceae	unclassified_Streptomycetaceae
ASV_54	8	7	10	6	0	0	4	0	0	11	9	4	0	0	0	5	84	48	233	59	298	139	222	134	115	55	90	79	87	Bacteria	Actinobacteria	Actinobacteria	Actinomycetales	Nocardioidaceae	Nocardioides
ASV_55	136	179	30	79	34	121	0	288	0	11	0	0	0	4	8	6	49	30	4	38	50	117	11	2	8	196	84	121	129	Bacteria	Proteobacteria	Gammaproteobacteria	Pseudomonadales	Pseudomonadaceae	Pseudomonas
ASV_56	0	0	0	0	0	0	0	0	0	0	0	0	4	0	0	0	71	103	27	446	112	164	449	10	14	34	38	71	126	Bacteria	Proteobacteria	Alphaproteobacteria	Rhizobiales	Phyllobacteriaceae	Phyllobacterium
ASV_57	0	0	0	0	0	1	0	0	0	0	0	0	0	0	0	0	20	10	220	28	84	122	192	135	185	113	107	228	206	Bacteria	Actinobacteria	Actinobacteria	Actinomycetales	Micrococcaceae	Arthrobacter
ASV_60	5	11	6	5	7	7	0	0	0	0	0	0	0	0	0	19	19	96	25	638	58	22	214	32	148	26	118	37	86	Bacteria	Actinobacteria	Actinobacteria	Actinomycetales	Microbacteriaceae	unclassified_Microbacteriaceae
ASV_61	0	0	0	0	0	0	0	0	0	0	0	0	0	0	0	0	145	57	253	52	105	98	275	130	163	67	48	80	74	Bacteria	Actinobacteria	Actinobacteria	Actinomycetales	Intrasporangiaceae	Phycicoccus
ASV_62	7	26	9	5	8	17	0	0	0	114	16	21	0	12	91	19	147	147	23	57	101	85	62	14	28	97	31	224	116	Bacteria	Firmicutes	Bacilli	Bacillales	Bacillaceae 1	Bacillus
ASV_63	0	0	0	0	0	0	0	18	0	0	0	9	0	0	0	0	68	44	245	61	67	168	519	88	120	27	19	9	68	Bacteria	Actinobacteria	Actinobacteria	Actinomycetales	Mycobacteriaceae	Mycobacterium
ASV_64	99	153	298	132	38	352	81	7	0	30	25	13	0	0	38	14	0	15	1	7	0	0	4	0	5	10	5	0	12	Bacteria	Actinobacteria	Actinobacteria	Actinomycetales	Microbacteriaceae	unclassified_Microbacteriaceae
ASV_65	0	0	0	0	0	0	0	0	0	0	0	0	0	0	0	0	59	32	185	76	53	90	460	97	143	44	15	38	87	Bacteria	Actinobacteria	Actinobacteria	Actinomycetales	Mycobacteriaceae	Mycobacterium
ASV_66	15	6	3	5	98	2	0	0	0	0	0	0	0	0	0	0	14	262	7	105	233	129	78	7	2	21	238	29	57	Bacteria	Proteobacteria	Gammaproteobacteria	Pseudomonadales	Pseudomonadaceae	Pseudomonas
ASV_67	0	0	0	0	0	0	0	0	0	0	0	0	10	0	0	0	164	75	152	58	124	87	212	94	140	63	47	83	60	Bacteria	Actinobacteria	Actinobacteria	Actinomycetales	Intrasporangiaceae	unclassified_Intrasporangiaceae
ASV_68	94	131	440	110	195	253	37	7	0	0	0	0	0	3	0	0	0	2	0	39	0	0	0	0	0	8	20	9	0	Bacteria	Proteobacteria	Betaproteobacteria	Burkholderiales	Oxalobacteraceae	Janthinobacterium
ASV_69	218	107	99	439	134	138	36	57	57	9	0	0	0	32	0	0	0	0	0	0	5	0	0	0	0	6	8	2	0	Bacteria	Proteobacteria	Gammaproteobacteria	Pseudomonadales	Pseudomonadaceae	Pseudomonas
ASV_70	36	196	6	171	11	6	8	23	0	0	18	3	0	37	7	0	0	0	0	0	0	0	0	0	0	0	0	0	0	Bacteria	Proteobacteria	Gammaproteobacteria	Pseudomonadales	Pseudomonadaceae	Pseudomonas
ASV_71	0	3	0	0	0	0	0	0	0	0	0	0	0	0	0	0	171	100	93	49	211	145	248	43	80	29	31	74	20	Bacteria	Actinobacteria	Actinobacteria	Actinomycetales	Kineosporiaceae	Kineosporia
ASV_72	6	6	1	4	2	0	0	0	0	0	0	0	0	0	0	0	8	35	4	928	105	82	62	0	0	6	14	7	21	Bacteria	Bacteroidetes	Sphingobacteriia	Sphingobacteriales	Sphingobacteriaceae	Pedobacter
ASV_73	0	10	9	2	0	9	6	0	0	0	0	0	0	0	0	0	12	10	37	31	15	42	32	143	395	157	95	241	38	Bacteria	Actinobacteria	Actinobacteria	Actinomycetales	Micromonosporaceae	unclassified_Micromonosporaceae
ASV_74	0	0	0	0	0	0	0	0	0	0	0	0	0	0	0	0	14	336	0	145	100	17	2	0	0	601	34	12	6	Bacteria	Bacteroidetes	Flavobacteriia	Flavobacteriales	Flavobacteriaceae	Flavobacterium
ASV_75	0	0	18	9	0	139	0	7	0	0	1085	0	0	0	4	0	0	0	0	0	0	0	0	0	0	0	0	0	2	Bacteria	Bacteroidetes	Sphingobacteriia	Sphingobacteriales	Sphingobacteriaceae	Pedobacter
ASV_76	0	0	0	0	0	0	0	0	0	0	0	0	0	0	0	0	0	126	58	75	141	93	47	0	31	288	136	183	83	Bacteria	unclassified_Bacteria	unclassified_Bacteria	unclassified_Bacteria	unclassified_Bacteria	unclassified_Bacteria
ASV_77	44	30	7	31	13	14	6	13	0	28	47	3	0	0	0	0	110	48	5	33	30	29	26	17	21	192	117	206	96	Bacteria	Proteobacteria	Alphaproteobacteria	Rhizobiales	Bradyrhizobiaceae	unclassified_Bradyrhizobiaceae
ASV_78	66	77	18	651	52	24	27	0	0	0	6	38	0	0	33	52	0	4	0	0	0	0	1	0	11	9	38	8	55	Bacteria	Actinobacteria	Actinobacteria	Actinomycetales	Sanguibacteraceae	Sanguibacter
ASV_79	0	68	14	20	44	41	36	0	0	0	0	0	0	12	32	9	15	20	42	22	49	24	72	236	150	58	52	82	45	Bacteria	Actinobacteria	Actinobacteria	Actinomycetales	Streptosporangiaceae	Streptosporangium
ASV_80	3	220	28	138	172	583	5	0	0	0	0	0	0	0	0	0	0	0	0	0	0	0	0	0	0	0	0	0	0	Bacteria	Proteobacteria	Gammaproteobacteria	Pseudomonadales	Pseudomonadaceae	Pseudomonas
ASV_82	0	84	175	103	535	128	2	0	0	0	0	0	0	0	0	0	0	0	0	0	0	0	0	0	0	31	5	1	0	Bacteria	Proteobacteria	Betaproteobacteria	Burkholderiales	Oxalobacteraceae	unclassified_Oxalobacteraceae
ASV_83	178	66	2	0	0	1	0	0	0	0	0	0	0	0	0	0	0	108	5	367	115	8	91	0	0	15	70	17	23	Bacteria	Bacteroidetes	Sphingobacteriia	Sphingobacteriales	Sphingobacteriaceae	Pedobacter
ASV_84	0	0	0	0	0	0	0	0	0	0	0	0	0	0	0	0	118	114	20	190	322	95	154	0	3	0	9	9	7	Bacteria	Proteobacteria	Alphaproteobacteria	Rhizobiales	Hyphomicrobiaceae	Devosia
ASV_85	0	0	0	0	0	0	0	0	0	0	0	0	0	3	0	0	346	229	7	81	140	39	40	7	0	30	10	16	67	Bacteria	Proteobacteria	Alphaproteobacteria	Rhizobiales	Bradyrhizobiaceae	unclassified_Bradyrhizobiaceae
ASV_86	350	67	36	26	14	4	13	241	0	3	19	0	0	0	0	0	0	6	0	7	4	0	23	0	1	14	21	2	98	Bacteria	Proteobacteria	Betaproteobacteria	Burkholderiales	Alcaligenaceae	unclassified_Alcaligenaceae
ASV_87	0	1	0	0	0	0	0	16	29	124	17	7	13	13	138	372	24	1	0	3	0	0	4	0	0	1	2	4	12	Bacteria	Actinobacteria	Actinobacteria	Actinomycetales	Propionibacteriaceae	Propionibacterium
ASV_88	0	36	209	23	542	27	74	0	0	0	0	0	0	0	0	0	0	0	0	0	0	0	3	0	0	33	7	5	0	Bacteria	Proteobacteria	Betaproteobacteria	Burkholderiales	Oxalobacteraceae	Janthinobacterium
ASV_89	15	31	53	646	24	9	15	28	0	0	0	0	0	122	0	0	0	0	0	0	0	0	0	0	0	0	1	0	0	Bacteria	Proteobacteria	Gammaproteobacteria	Pseudomonadales	Pseudomonadaceae	Pseudomonas
ASV_90	0	5	0	0	0	0	0	0	0	0	0	0	0	0	7	0	43	19	117	32	41	118	197	81	54	28	47	56	97	Bacteria	Actinobacteria	Actinobacteria	Actinomycetales	Nocardioidaceae	Nocardioides
ASV_91	3	5	3	0	0	0	0	0	0	9	0	0	6	0	0	0	38	345	46	89	39	34	100	39	46	20	11	27	13	Bacteria	Actinobacteria	Actinobacteria	Actinomycetales	Streptomycetaceae	Streptomyces
ASV_93	0	0	0	0	0	0	0	0	0	0	0	0	0	0	0	0	90	37	33	43	92	93	185	6	12	75	37	121	52	Bacteria	Proteobacteria	Alphaproteobacteria	Rhizobiales	Rhizobiaceae	unclassified_Rhizobiaceae
ASV_94	11	2	3	11	2	2	0	0	3	0	0	0	0	0	0	0	86	72	64	49	51	44	56	46	132	34	35	50	112	Bacteria	Actinobacteria	Actinobacteria	Actinomycetales	Micrococcaceae	Arthrobacter
ASV_95	2	0	0	0	0	2	0	0	0	0	0	0	0	0	0	15	112	57	103	31	88	60	89	71	108	26	36	30	31	Bacteria	Actinobacteria	Actinobacteria	Actinomycetales	Cellulomonadaceae	Cellulomonas
ASV_96	38	37	53	1	3	10	0	9	0	0	10	0	0	0	0	0	1	56	3	408	22	31	74	2	4	0	55	14	7	Bacteria	Bacteroidetes	Flavobacteriia	Flavobacteriales	Flavobacteriaceae	Chryseobacterium
ASV_98	13	0	0	0	0	16	0	0	0	0	15	0	3	0	0	13	68	100	35	81	105	58	110	21	42	52	53	45	31	Bacteria	Actinobacteria	Actinobacteria	Actinomycetales	Streptomycetaceae	Streptomyces
ASV_100	52	40	14	8	28	22	4	8	0	23	77	0	0	24	7	5	42	113	15	83	13	14	40	22	19	17	65	9	60	Bacteria	Actinobacteria	Actinobacteria	Actinomycetales	Microbacteriaceae	unclassified_Microbacteriaceae
ASV_102	4	4	0	10	0	1	0	0	0	0	7	0	0	0	0	0	44	22	4	54	133	94	63	5	3	68	91	136	84	Bacteria	Proteobacteria	Alphaproteobacteria	Sphingomonadales	Sphingomonadaceae	Sphingomonas
ASV_103	0	0	0	0	0	0	0	3	0	50	8	13	0	0	40	100	340	7	0	9	0	0	0	1	0	19	0	16	23	Bacteria	Firmicutes	Bacilli	Bacillales	Staphylococcaceae	Staphylococcus
ASV_104	0	0	0	0	0	3	0	0	0	0	0	0	0	14	0	0	11	23	233	77	50	50	94	132	31	21	29	18	25	Bacteria	Actinobacteria	Actinobacteria	Actinomycetales	Mycobacteriaceae	Mycobacterium
ASV_105	0	0	0	0	0	0	0	0	0	0	0	0	0	0	0	0	149	86	12	84	78	71	161	9	8	31	21	55	42	Bacteria	Proteobacteria	Alphaproteobacteria	Rhizobiales	Bradyrhizobiaceae	unclassified_Bradyrhizobiaceae
ASV_106	0	0	0	0	0	0	0	0	0	0	0	0	0	0	0	0	98	34	42	36	122	81	158	0	49	40	0	69	23	Bacteria	Actinobacteria	Actinobacteria	Actinomycetales	Kineosporiaceae	unclassified_Kineosporiaceae
ASV_107	0	0	0	0	0	0	0	0	0	0	0	0	0	0	0	0	11	40	0	80	265	44	264	0	0	0	33	9	0	Bacteria	Proteobacteria	Betaproteobacteria	Burkholderiales	Comamonadaceae	Polaromonas
ASV_109	0	6	11	7	0	11	6	0	0	36	10	7	0	0	49	25	52	74	10	22	60	27	33	4	7	45	20	101	49	Bacteria	Firmicutes	Bacilli	Bacillales	Bacillaceae 1	Bacillus
ASV_110	0	17	2	3	1	0	4	15	0	0	0	0	0	0	0	0	21	32	4	55	39	85	52	8	7	80	126	49	90	Bacteria	Proteobacteria	Betaproteobacteria	Burkholderiales	Comamonadaceae	Variovorax
ASV_111	0	5	2	2	0	0	0	0	0	0	0	0	0	0	0	0	59	38	18	42	59	44	129	16	19	70	33	122	57	Bacteria	Proteobacteria	Alphaproteobacteria	Rhizobiales	Phyllobacteriaceae	unclassified_Phyllobacteriaceae
ASV_112	14	186	99	30	20	20	6	202	66	0	0	0	0	1	0	7	1	0	0	0	26	9	5	0	0	10	8	0	0	Bacteria	Proteobacteria	Gammaproteobacteria	Pseudomonadales	Pseudomonadaceae	Pseudomonas
ASV_113	1	6	4	1	3	4	0	0	0	2	0	7	0	0	0	0	53	114	33	21	38	66	43	26	38	17	78	25	124	Bacteria	Actinobacteria	Actinobacteria	Actinomycetales	Microbacteriaceae	Microbacterium
ASV_114	24	234	27	202	72	22	12	39	51	0	0	0	0	10	0	0	0	0	0	0	0	0	0	0	0	0	3	0	0	Bacteria	Proteobacteria	Gammaproteobacteria	Pseudomonadales	Pseudomonadaceae	Pseudomonas
ASV_115	0	16	5	0	0	0	0	0	0	19	0	0	0	0	0	0	69	68	21	48	42	24	37	53	101	57	29	81	33	Bacteria	Actinobacteria	Actinobacteria	Actinomycetales	Streptomycetaceae	Streptomyces
ASV_116	5	42	17	41	4	26	0	0	0	0	0	48	0	18	52	0	5	6	0	10	23	65	29	0	1	34	54	116	28	Bacteria	Proteobacteria	Alphaproteobacteria	Sphingomonadales	Sphingomonadaceae	Sphingomonas
ASV_117	0	1	0	0	0	0	0	0	0	0	0	0	0	0	0	0	7	71	1	20	10	501	42	2	0	0	11	3	27	Bacteria	Bacteroidetes	Sphingobacteriia	Sphingobacteriales	Sphingobacteriaceae	Pedobacter
ASV_119	0	0	0	0	0	0	0	0	0	0	0	0	0	0	0	0	66	152	28	44	116	43	71	17	5	16	26	28	69	Bacteria	Proteobacteria	Betaproteobacteria	Burkholderiales	Comamonadaceae	Variovorax
ASV_120	0	0	5	0	0	0	0	0	0	0	0	12	0	0	0	0	32	29	44	32	59	47	97	60	81	46	28	65	26	Bacteria	Actinobacteria	Actinobacteria	Actinomycetales	Nocardioidaceae	Marmoricola
ASV_121	0	3	0	0	0	3	0	0	0	0	0	0	0	0	0	0	34	43	4	31	65	39	20	2	0	87	73	181	81	Bacteria	Proteobacteria	Alphaproteobacteria	Sphingomonadales	Sphingomonadaceae	unclassified_Sphingomonadaceae
ASV_122	0	1	0	0	19	0	0	0	0	0	0	0	0	0	0	0	0	0	0	519	24	81	0	1	2	10	7	0	1	Bacteria	Proteobacteria	Gammaproteobacteria	Xanthomonadales	Xanthomonadaceae	Stenotrophomonas
ASV_123	0	0	0	0	0	0	0	0	0	0	0	0	0	0	0	0	0	19	11	23	0	105	229	0	0	39	38	9	185	Bacteria	Proteobacteria	Alphaproteobacteria	Sphingomonadales	Sphingomonadaceae	Sphingobium
ASV_124	0	0	8	4	0	0	2	0	0	0	0	0	0	0	0	0	50	22	20	55	49	168	70	0	4	60	81	29	23	Bacteria	Proteobacteria	Betaproteobacteria	Burkholderiales	Oxalobacteraceae	Massilia
ASV_125	19	13	22	26	19	20	13	0	0	19	122	0	0	0	0	0	0	54	22	0	24	28	32	22	28	41	30	23	21	Bacteria	Actinobacteria	Actinobacteria	Actinomycetales	Nocardioidaceae	Aeromicrobium
ASV_126	3	0	0	0	0	0	0	0	0	0	0	0	0	0	0	0	39	68	16	86	75	64	71	8	8	33	40	68	53	Bacteria	Proteobacteria	Alphaproteobacteria	Rhizobiales	Bradyrhizobiaceae	Bosea
ASV_128	35	44	146	325	8	13	16	7	0	0	0	0	0	0	0	0	0	15	0	0	0	0	0	0	0	0	0	0	0	Bacteria	Proteobacteria	Betaproteobacteria	Burkholderiales	Oxalobacteraceae	Massilia
ASV_129	50	73	80	40	89	38	0	1	0	0	9	35	0	0	47	0	0	2	0	5	3	80	9	1	0	0	44	0	0	Bacteria	Bacteroidetes	Sphingobacteriia	Sphingobacteriales	Sphingobacteriaceae	Pedobacter
ASV_131	0	0	0	0	0	0	0	0	0	0	0	0	0	0	0	0	0	28	8	19	27	77	78	2	6	74	37	204	41	Bacteria	Proteobacteria	Alphaproteobacteria	Sphingomonadales	Sphingomonadaceae	unclassified_Sphingomonadaceae
ASV_132	16	30	69	10	13	388	0	0	0	0	0	0	0	0	0	0	0	0	0	1	0	0	0	0	0	0	6	0	0	Bacteria	Proteobacteria	Betaproteobacteria	Burkholderiales	Oxalobacteraceae	Janthinobacterium
ASV_133	8	17	27	13	17	14	23	0	0	22	54	0	2	13	21	0	19	23	22	15	29	21	57	23	45	26	16	23	17	Bacteria	Actinobacteria	Actinobacteria	Actinomycetales	Geodermatophilaceae	Blastococcus
ASV_134	178	26	0	37	0	61	0	0	0	0	266	17	0	0	0	0	0	0	0	0	0	0	0	0	0	0	0	0	0	Bacteria	Proteobacteria	Betaproteobacteria	Burkholderiales	Oxalobacteraceae	Massilia
ASV_135	3	11	2	0	2	8	0	9	0	0	18	0	0	0	30	21	73	48	12	27	24	36	36	11	10	61	16	64	55	Bacteria	Firmicutes	Bacilli	Bacillales	Paenibacillaceae 1	Paenibacillus
ASV_136	6	3	0	0	0	1	4	0	0	0	0	0	0	0	0	0	13	10	129	17	43	54	114	45	42	17	35	29	13	Bacteria	Actinobacteria	Actinobacteria	Actinomycetales	Intrasporangiaceae	unclassified_Intrasporangiaceae
ASV_137	7	3	0	0	5	0	0	0	0	0	0	0	0	0	0	0	45	26	50	23	87	22	55	44	54	31	34	38	51	Bacteria	Actinobacteria	Actinobacteria	Actinomycetales	Intrasporangiaceae	Terrabacter
ASV_138	0	0	0	0	0	0	0	0	0	0	0	0	0	0	0	0	24	270	17	18	6	102	97	14	4	0	7	0	2	Bacteria	Proteobacteria	Betaproteobacteria	Burkholderiales	Comamonadaceae	Variovorax
ASV_139	0	0	0	0	0	0	0	0	0	0	0	0	0	0	0	0	101	51	147	49	41	25	76	16	32	0	14	0	9	Bacteria	Actinobacteria	Actinobacteria	Actinomycetales	Nocardioidaceae	Kribbella
ASV_141	0	0	0	3	0	3	5	0	0	0	0	0	0	0	0	0	29	9	22	0	9	15	25	62	158	74	38	89	10	Bacteria	Actinobacteria	Actinobacteria	Actinomycetales	Micromonosporaceae	unclassified_Micromonosporaceae
ASV_143	0	12	0	0	0	6	0	0	0	0	0	0	0	0	0	0	0	6	13	12	0	8	6	41	222	75	47	61	37	Bacteria	Actinobacteria	Actinobacteria	Actinomycetales	Micromonosporaceae	unclassified_Micromonosporaceae
ASV_144	0	2	0	0	0	0	0	0	0	0	0	0	0	0	0	0	0	9	0	7	1	46	71	4	8	27	107	42	207	Bacteria	Proteobacteria	Alphaproteobacteria	Sphingomonadales	Sphingomonadaceae	unclassified_Sphingomonadaceae
ASV_145	220	28	14	57	8	26	9	0	0	0	129	0	0	2	6	0	0	15	0	0	0	0	1	0	0	0	0	0	0	Bacteria	Proteobacteria	Betaproteobacteria	Burkholderiales	Oxalobacteraceae	Massilia
ASV_146	0	0	5	0	0	0	0	6	0	0	0	0	0	0	0	0	0	0	0	0	0	11	0	96	18	7	355	8	11	Bacteria	Proteobacteria	Gammaproteobacteria	Xanthomonadales	Xanthomonadaceae	Stenotrophomonas
ASV_147	0	0	0	0	0	0	4	0	0	0	0	0	0	0	0	0	21	36	100	21	16	40	82	51	44	19	9	0	31	Bacteria	Actinobacteria	Actinobacteria	Actinomycetales	Micromonosporaceae	Catellatospora
ASV_148	40	62	39	44	10	22	14	5	0	0	10	16	0	0	27	8	14	13	0	0	0	0	5	18	26	57	15	26	26	Bacteria	Actinobacteria	Actinobacteria	Actinomycetales	Nocardioidaceae	Marmoricola
ASV_151	6	6	3	6	5	7	1	0	0	28	3	24	9	18	74	0	23	28	3	14	19	10	23	7	6	34	26	56	32	Bacteria	Firmicutes	Bacilli	Bacillales	Bacillaceae 1	Bacillus
ASV_153	0	0	0	0	0	0	0	0	19	0	13	60	0	0	44	0	15	182	3	0	2	0	4	0	0	2	0	0	25	Bacteria	Actinobacteria	Actinobacteria	Actinomycetales	Micrococcaceae	Kocuria
ASV_154	0	0	0	0	0	0	0	36	6	34	21	51	25	15	32	25	0	0	0	0	0	1	0	0	0	0	0	0	0	Bacteria	unclassified_Bacteria	unclassified_Bacteria	unclassified_Bacteria	unclassified_Bacteria	unclassified_Bacteria
ASV_155	66	64	8	38	210	44	0	1	0	0	3	0	0	0	0	0	0	0	0	18	0	25	0	0	0	0	11	0	0	Bacteria	Bacteroidetes	Sphingobacteriia	Sphingobacteriales	Sphingobacteriaceae	Pedobacter
ASV_156	0	0	0	0	0	0	0	0	0	0	8	0	0	0	0	0	40	37	31	23	60	49	59	25	39	16	34	31	35	Bacteria	Actinobacteria	Actinobacteria	Actinomycetales	Nocardioidaceae	Nocardioides
ASV_157	4	2	0	0	0	0	0	0	0	12	0	0	0	0	0	9	25	51	11	25	25	22	47	9	13	58	24	78	65	Bacteria	Proteobacteria	Alphaproteobacteria	Rhizobiales	Bradyrhizobiaceae	Bradyrhizobium
ASV_159	21	17	298	23	14	67	4	0	0	0	0	0	0	0	0	0	0	0	0	7	0	1	0	0	2	2	4	0	20	Bacteria	Actinobacteria	Actinobacteria	Actinomycetales	Microbacteriaceae	Clavibacter
ASV_160	0	5	0	1	6	21	0	0	0	0	0	0	0	0	0	0	3	0	0	1	1	4	281	12	0	25	3	10	90	Bacteria	Proteobacteria	Gammaproteobacteria	Enterobacteriales	Enterobacteriaceae	Pantoea
ASV_162	47	28	73	34	25	124	18	0	0	5	49	8	0	0	0	0	7	9	0	0	0	2	4	0	0	5	0	0	0	Bacteria	Actinobacteria	Actinobacteria	Actinomycetales	Microbacteriaceae	Clavibacter
ASV_163	7	0	3	4	3	0	0	0	0	0	0	0	0	0	0	0	44	16	37	8	15	12	25	122	63	33	9	25	42	Bacteria	Actinobacteria	Actinobacteria	Actinomycetales	Mycobacteriaceae	Mycobacterium
ASV_164	233	34	8	119	4	10	9	1	0	0	37	0	0	0	0	0	0	12	0	0	0	0	0	0	0	0	0	0	0	Bacteria	Proteobacteria	Betaproteobacteria	Burkholderiales	Oxalobacteraceae	unclassified_Oxalobacteraceae
ASV_165	0	0	0	0	0	0	0	0	0	0	0	0	0	0	0	0	41	38	45	22	68	54	75	61	34	16	0	2	10	Bacteria	Actinobacteria	Actinobacteria	Actinomycetales	Mycobacteriaceae	Mycobacterium
ASV_166	0	0	0	0	0	0	464	0	0	0	0	0	0	0	0	0	0	0	0	0	0	0	0	0	0	0	0	0	0	Bacteria	Proteobacteria	Gammaproteobacteria	Pseudomonadales	Pseudomonadaceae	Pseudomonas
ASV_167	1	0	1	4	0	2	0	0	0	0	1	0	0	0	0	0	16	21	0	27	65	33	25	2	2	44	54	112	50	Bacteria	Proteobacteria	Alphaproteobacteria	Sphingomonadales	Sphingomonadaceae	Sphingomonas
ASV_168	0	0	0	0	0	0	0	0	0	0	0	0	0	0	0	0	20	33	6	24	44	38	47	20	27	24	57	75	33	Bacteria	Actinobacteria	Actinobacteria	Acidimicrobiales	Acidimicrobiaceae	Ilumatobacter
ASV_169	3	0	0	0	2	0	0	0	0	0	0	0	0	0	0	0	14	29	20	9	19	6	7	66	89	36	34	97	26	Bacteria	Actinobacteria	Actinobacteria	Actinomycetales	Micromonosporaceae	Dactylosporangium
ASV_170	0	60	18	21	1	39	13	0	0	0	0	0	0	3	163	11	0	0	0	0	0	0	0	1	28	15	6	3	1	Bacteria	Actinobacteria	Actinobacteria	Actinomycetales	Micrococcaceae	Arthrobacter
ASV_171	0	0	0	0	0	0	0	0	0	0	0	0	0	0	0	0	0	4	79	0	0	49	90	37	103	19	29	21	22	Bacteria	Actinobacteria	Actinobacteria	Actinomycetales	Micromonosporaceae	Actinoplanes
ASV_172	0	4	0	0	5	368	5	0	0	4	0	0	6	0	0	40	0	0	1	0	0	0	0	0	0	0	4	0	2	Bacteria	Actinobacteria	Actinobacteria	Actinomycetales	Micrococcaceae	Arthrobacter
ASV_173	0	0	0	0	0	0	0	0	0	0	0	0	0	0	0	0	0	0	0	12	0	0	0	36	146	86	39	113	17	Bacteria	Actinobacteria	Actinobacteria	Actinomycetales	Micromonosporaceae	unclassified_Micromonosporaceae
ASV_174	0	0	0	0	0	0	0	0	0	0	0	0	0	0	0	0	38	40	38	85	20	15	48	30	53	22	15	28	15	Bacteria	Actinobacteria	Actinobacteria	Actinomycetales	Nocardioidaceae	Kribbella
ASV_175	0	0	0	0	0	0	0	0	0	0	7	0	0	0	0	0	25	38	39	36	67	37	92	14	25	0	16	33	13	Bacteria	Actinobacteria	Actinobacteria	Actinomycetales	unclassified_Actinomycetales	unclassified_Actinomycetales
ASV_176	173	6	54	138	2	34	21	1	0	0	9	0	0	0	0	0	0	0	0	0	0	0	0	0	0	0	0	0	0	Bacteria	Proteobacteria	Betaproteobacteria	Burkholderiales	Oxalobacteraceae	unclassified_Oxalobacteraceae
ASV_177	0	0	0	0	0	0	0	0	0	0	0	0	0	0	0	0	42	20	57	0	32	12	27	63	65	20	18	33	25	Bacteria	Actinobacteria	Actinobacteria	Actinomycetales	Cellulomonadaceae	Cellulomonas
ASV_178	24	21	73	238	0	17	14	3	0	0	0	0	0	0	0	0	0	31	0	0	0	1	1	0	0	0	2	0	0	Bacteria	Proteobacteria	Betaproteobacteria	Burkholderiales	Oxalobacteraceae	Massilia
ASV_179	0	0	0	0	4	5	5	0	0	0	0	0	0	0	0	0	42	23	17	44	23	27	35	38	20	47	20	35	42	Bacteria	Actinobacteria	Actinobacteria	Actinomycetales	Streptomycetaceae	Streptomyces
ASV_180	16	136	50	46	5	55	0	3	0	0	26	5	0	10	15	0	0	1	0	0	0	0	0	0	0	0	6	0	0	Bacteria	Bacteroidetes	Sphingobacteriia	Sphingobacteriales	Sphingobacteriaceae	Pedobacter
ASV_181	0	0	0	0	0	0	0	0	0	0	0	0	0	0	0	0	23	0	28	14	30	14	47	41	50	44	29	48	34	Bacteria	Actinobacteria	Actinobacteria	Actinomycetales	Intrasporangiaceae	Janibacter
ASV_182	0	7	0	5	18	4	0	0	0	12	0	0	0	0	0	13	36	16	25	22	36	14	17	14	41	46	14	52	0	Bacteria	Actinobacteria	Actinobacteria	Actinomycetales	Intrasporangiaceae	Terrabacter
ASV_183	0	0	0	0	0	0	0	0	0	0	0	0	0	0	0	0	0	31	0	344	21	0	10	0	0	0	0	0	0	Bacteria	Bacteroidetes	Sphingobacteriia	Sphingobacteriales	Sphingobacteriaceae	Sphingobacterium
ASV_184	0	0	0	0	0	0	0	3	0	0	0	0	0	0	0	0	1	248	9	19	49	41	16	0	6	4	0	0	2	Bacteria	Proteobacteria	Gammaproteobacteria	Xanthomonadales	Xanthomonadaceae	Stenotrophomonas
ASV_185	0	0	0	0	0	0	0	0	0	0	0	0	0	0	0	0	7	31	41	13	40	27	86	38	12	33	17	42	18	Bacteria	Proteobacteria	Alphaproteobacteria	Rhizobiales	unclassified_Rhizobiales	unclassified_Rhizobiales
ASV_186	18	6	0	0	191	0	0	18	0	0	7	0	0	0	0	0	0	0	0	100	30	0	0	0	0	0	2	0	0	Bacteria	Bacteroidetes	Sphingobacteriia	Sphingobacteriales	Sphingobacteriaceae	Pedobacter
ASV_187	77	31	6	20	8	7	13	0	0	14	9	23	0	10	9	0	10	20	0	2	12	22	4	4	1	12	18	6	9	Bacteria	Proteobacteria	Alphaproteobacteria	Rhizobiales	Aurantimonadaceae	Aureimonas
ASV_188	0	0	0	0	0	0	0	0	0	0	0	0	0	0	0	0	0	0	0	0	0	399	0	0	0	0	0	0	0	Bacteria	Firmicutes	Bacilli	Bacillales	Bacillaceae 1	Bacillus
ASV_189	67	38	94	27	41	61	10	0	0	0	10	0	0	0	0	0	5	4	0	5	6	2	0	0	0	5	10	3	7	Bacteria	Actinobacteria	Actinobacteria	Actinomycetales	Microbacteriaceae	unclassified_Microbacteriaceae
ASV_190	0	0	0	0	0	0	0	0	0	0	0	0	0	0	0	0	35	18	8	34	37	16	14	30	56	41	15	55	36	Bacteria	Actinobacteria	Actinobacteria	Actinomycetales	Nocardioidaceae	unclassified_Nocardioidaceae
ASV_191	0	0	0	0	0	2	0	0	0	0	0	0	0	0	0	0	20	18	82	16	19	30	149	19	11	14	0	2	8	Bacteria	Actinobacteria	Actinobacteria	Actinomycetales	Mycobacteriaceae	Mycobacterium
ASV_192	2	13	13	13	10	14	5	0	0	0	0	0	0	0	0	0	20	27	0	15	23	8	0	0	64	44	18	47	20	Bacteria	Actinobacteria	Actinobacteria	Actinomycetales	Intrasporangiaceae	unclassified_Intrasporangiaceae
ASV_193	0	4	0	0	0	0	0	0	0	0	0	0	0	0	0	0	37	40	9	16	36	45	74	0	4	37	8	38	33	Bacteria	Proteobacteria	Alphaproteobacteria	Rhizobiales	Phyllobacteriaceae	Mesorhizobium
ASV_194	0	0	0	0	0	0	0	0	0	0	0	0	0	0	0	0	42	17	15	23	29	17	25	24	33	27	34	61	34	Bacteria	Actinobacteria	Actinobacteria	Actinomycetales	Nocardioidaceae	Nocardioides
ASV_196	0	0	0	0	0	0	0	0	0	0	0	3	0	0	0	3	23	28	26	11	69	48	55	19	0	6	24	22	40	Bacteria	Actinobacteria	Actinobacteria	Actinomycetales	Nocardioidaceae	Nocardioides
ASV_197	0	0	0	0	0	0	0	0	0	0	0	0	0	0	0	0	15	21	17	14	15	51	144	4	5	7	18	27	36	Bacteria	Proteobacteria	Alphaproteobacteria	Rhizobiales	Rhizobiaceae	Rhizobium
ASV_199	0	0	0	0	0	0	0	0	0	0	0	0	0	0	0	0	28	16	30	12	44	27	32	34	51	30	18	30	18	Bacteria	Actinobacteria	Actinobacteria	Actinomycetales	Microbacteriaceae	unclassified_Microbacteriaceae
ASV_200	0	0	0	0	0	0	0	0	0	0	28	12	0	0	0	0	5	48	27	13	55	28	99	17	11	0	13	7	0	Bacteria	Actinobacteria	Actinobacteria	Actinomycetales	Streptomycetaceae	unclassified_Streptomycetaceae
ASV_201	105	44	1	43	74	17	0	0	0	0	0	0	0	0	0	0	0	0	0	37	0	26	1	0	0	0	11	0	2	Bacteria	Bacteroidetes	Sphingobacteriia	Sphingobacteriales	Sphingobacteriaceae	Pedobacter
ASV_202	3	0	0	0	0	0	0	0	0	0	0	0	0	0	0	0	5	45	6	120	42	50	20	4	5	13	3	4	36	Bacteria	Proteobacteria	Alphaproteobacteria	Rhizobiales	Rhizobiaceae	Kaistia
ASV_203	0	0	0	0	0	0	0	32	4	27	12	40	16	9	22	18	0	0	0	0	0	0	0	0	0	0	0	0	0	Bacteria	unclassified_Bacteria	unclassified_Bacteria	unclassified_Bacteria	unclassified_Bacteria	unclassified_Bacteria
ASV_204	0	0	0	0	0	0	0	0	0	0	0	0	0	0	0	0	82	89	0	75	32	28	8	0	0	3	0	4	32	Bacteria	Firmicutes	Bacilli	Bacillales	Paenibacillaceae 1	unclassified_Paenibacillaceae 1
ASV_205	0	0	0	0	0	0	0	0	0	0	0	0	0	0	0	0	10	54	6	14	23	24	23	25	24	21	33	39	55	Bacteria	Actinobacteria	Actinobacteria	Actinomycetales	Streptomycetaceae	Streptomyces
ASV_206	0	0	0	0	0	0	350	0	0	0	0	0	0	0	0	0	0	0	0	0	0	0	0	0	0	0	0	0	0	Bacteria	Proteobacteria	Gammaproteobacteria	Pseudomonadales	Pseudomonadaceae	Pseudomonas
ASV_207	7	7	8	0	6	10	3	0	0	0	0	15	0	12	47	0	20	19	14	21	15	14	13	10	25	13	7	25	6	Bacteria	unclassified_Bacteria	unclassified_Bacteria	unclassified_Bacteria	unclassified_Bacteria	unclassified_Bacteria
ASV_208	0	0	0	0	0	0	0	0	0	0	0	0	0	0	0	0	54	6	14	11	13	10	6	30	79	35	21	43	9	Bacteria	Actinobacteria	Actinobacteria	Actinomycetales	Micromonosporaceae	unclassified_Micromonosporaceae
ASV_209	2	0	0	0	0	0	0	0	0	0	0	0	0	0	0	0	0	7	2	302	1	12	2	0	0	10	0	0	0	Bacteria	Firmicutes	Bacilli	Bacillales	Bacillaceae 1	Bacillus
ASV_211	0	0	0	0	0	0	0	51	2	32	17	42	34	13	0	39	0	0	0	0	0	0	0	0	0	1	0	0	0	Bacteria	unclassified_Bacteria	unclassified_Bacteria	unclassified_Bacteria	unclassified_Bacteria	unclassified_Bacteria
ASV_212	2	8	4	5	0	9	0	0	0	0	43	0	0	0	0	0	0	19	2	91	26	0	5	0	2	35	76	7	0	Bacteria	Bacteroidetes	Sphingobacteriia	Sphingobacteriales	Sphingobacteriaceae	Pedobacter
ASV_213	0	0	0	0	0	0	0	0	0	0	0	0	0	0	0	0	0	0	0	0	0	0	0	0	0	0	0	333	0	Bacteria	Proteobacteria	Gammaproteobacteria	Enterobacteriales	Enterobacteriaceae	Serratia
ASV_215	0	0	2	0	0	0	0	0	0	67	0	0	0	11	0	50	0	0	0	0	0	0	0	0	0	0	0	0	0	Bacteria	Actinobacteria	Actinobacteria	Actinomycetales	Corynebacteriaceae	Corynebacterium
ASV_216	0	0	0	0	0	0	0	0	0	0	0	0	0	0	0	0	3	16	0	249	29	0	21	0	0	0	0	0	0	Bacteria	Proteobacteria	Alphaproteobacteria	Rhizobiales	Phyllobacteriaceae	Phyllobacterium
ASV_218	0	0	0	3	0	0	0	0	0	0	0	0	0	0	0	0	5	8	1	0	13	1	20	25	8	7	190	20	16	Bacteria	Proteobacteria	Alphaproteobacteria	Rhizobiales	Rhizobiaceae	unclassified_Rhizobiaceae
ASV_219	0	1	0	1	0	0	0	0	0	0	0	0	0	0	0	0	25	5	0	0	0	0	86	0	9	31	46	57	53	Bacteria	Proteobacteria	Alphaproteobacteria	Rhizobiales	Rhizobiaceae	Rhizobium
ASV_220	0	0	0	0	0	0	0	0	0	0	0	0	0	7	0	0	34	21	9	0	23	31	44	5	11	24	13	49	40	Bacteria	Proteobacteria	Alphaproteobacteria	Rhizobiales	Bradyrhizobiaceae	Bradyrhizobium
ASV_221	0	0	0	0	0	0	2	0	0	0	0	0	0	0	0	0	18	6	20	11	19	8	19	31	61	30	18	31	37	Bacteria	Actinobacteria	Actinobacteria	Actinomycetales	Intrasporangiaceae	Terrabacter
ASV_222	0	2	0	0	8	79	0	0	0	0	0	0	0	0	0	0	0	0	0	0	0	0	167	0	0	38	3	0	10	Bacteria	Proteobacteria	Gammaproteobacteria	Enterobacteriales	Enterobacteriaceae	unclassified_Enterobacteriaceae
ASV_224	0	21	2	0	16	11	20	0	0	0	0	0	4	0	23	0	6	0	16	3	0	11	26	39	32	10	14	9	21	Bacteria	Actinobacteria	Actinobacteria	Actinomycetales	Streptosporangiaceae	Sphaerisporangium
ASV_226	0	0	0	0	0	0	0	0	0	0	0	0	0	0	0	0	0	0	0	0	0	0	0	0	0	0	0	299	0	Bacteria	Proteobacteria	Gammaproteobacteria	Enterobacteriales	Enterobacteriaceae	Serratia
ASV_227	2	175	0	0	0	0	88	0	0	0	0	0	0	0	0	0	0	2	11	0	0	0	0	0	0	0	0	0	20	Bacteria	Bacteroidetes	Sphingobacteriia	Sphingobacteriales	Sphingobacteriaceae	Pedobacter
ASV_229	0	0	0	0	0	0	0	0	0	0	11	0	0	0	19	0	23	0	23	0	32	25	33	20	30	14	24	25	17	Bacteria	Actinobacteria	Actinobacteria	Actinomycetales	Intrasporangiaceae	unclassified_Intrasporangiaceae
ASV_230	0	0	2	2	0	0	4	0	0	0	0	0	0	0	0	0	10	16	15	17	9	12	16	52	30	61	5	25	15	Bacteria	Actinobacteria	Actinobacteria	Actinomycetales	Mycobacteriaceae	Mycobacterium
ASV_231	3	0	0	7	0	0	0	0	0	0	0	0	0	0	0	11	9	9	20	12	42	19	0	0	33	29	29	66	4	Bacteria	Actinobacteria	Actinobacteria	Actinomycetales	unclassified_Actinomycetales	unclassified_Actinomycetales
ASV_232	0	0	1	0	0	0	0	0	0	0	0	0	0	0	0	0	7	5	0	15	13	0	17	0	0	105	26	90	14	Bacteria	Proteobacteria	Betaproteobacteria	Burkholderiales	Oxalobacteraceae	unclassified_Oxalobacteraceae
ASV_233	0	65	83	27	0	44	0	0	0	0	0	0	0	0	0	0	0	0	0	0	0	0	0	0	2	45	13	2	6	Bacteria	Proteobacteria	Betaproteobacteria	Burkholderiales	Oxalobacteraceae	Massilia
ASV_234	0	0	0	0	0	0	0	0	0	0	0	0	0	0	0	0	0	0	11	0	0	194	87	0	0	0	0	0	0	Bacteria	Actinobacteria	Actinobacteria	Actinomycetales	Streptomycetaceae	Streptomyces
ASV_235	0	7	3	2	0	10	0	0	0	8	13	21	0	7	18	19	7	10	0	12	13	5	0	0	5	17	7	18	15	Bacteria	Firmicutes	Bacilli	Bacillales	Bacillaceae 1	Bacillus
ASV_236	0	0	0	0	0	0	0	0	0	0	0	0	0	0	0	0	27	4	10	83	29	15	13	0	4	15	19	63	7	Bacteria	Proteobacteria	Betaproteobacteria	Burkholderiales	Oxalobacteraceae	unclassified_Oxalobacteraceae
ASV_237	4	5	0	0	7	0	0	0	0	0	8	0	0	0	6	0	23	14	31	11	34	25	30	15	29	0	12	16	18	Bacteria	Actinobacteria	Actinobacteria	Actinomycetales	Micrococcaceae	Arthrobacter
ASV_238	0	0	0	0	0	0	0	0	0	0	0	0	0	0	0	0	24	17	12	13	11	22	45	17	17	28	11	36	26	Bacteria	Actinobacteria	Actinobacteria	Actinomycetales	Kineosporiaceae	Kineosporia
ASV_239	0	0	0	0	0	0	0	0	0	0	0	0	0	0	0	0	16	9	4	97	59	19	16	0	0	13	23	22	9	Bacteria	Verrucomicrobia	Verrucomicrobiae	Verrucomicrobiales	Verrucomicrobiaceae	Luteolibacter
ASV_240	45	8	3	0	0	8	2	0	0	0	25	0	0	0	0	0	5	14	0	0	43	15	7	3	4	19	60	10	14	Bacteria	Proteobacteria	Alphaproteobacteria	Rhizobiales	Rhizobiaceae	unclassified_Rhizobiaceae
ASV_241	5	5	0	7	0	0	1	6	0	0	9	0	0	0	0	0	53	18	0	0	32	9	98	0	0	11	9	12	6	Bacteria	Proteobacteria	Betaproteobacteria	Burkholderiales	Comamonadaceae	unclassified_Comamonadaceae
ASV_242	0	11	5	5	9	7	8	0	0	0	0	11	0	12	48	0	7	8	11	3	0	9	16	13	44	9	10	20	5	Bacteria	Actinobacteria	Actinobacteria	Actinomycetales	Intrasporangiaceae	Oryzihumus
ASV_243	0	0	0	0	0	0	0	0	0	0	0	0	0	0	0	0	6	2	0	15	35	21	8	8	6	46	48	76	9	Bacteria	Proteobacteria	Gammaproteobacteria	Xanthomonadales	Xanthomonadaceae	Arenimonas
ASV_244	0	99	55	58	0	41	0	0	0	0	0	0	0	0	0	0	0	0	0	0	0	0	0	0	0	13	11	2	0	Bacteria	Proteobacteria	Betaproteobacteria	Burkholderiales	Oxalobacteraceae	Massilia
ASV_245	0	0	0	0	0	0	0	19	8	7	0	0	6	74	50	0	0	0	0	0	0	0	0	0	0	0	0	0	0	Bacteria	unclassified_Bacteria	unclassified_Bacteria	unclassified_Bacteria	unclassified_Bacteria	unclassified_Bacteria
ASV_246	0	0	0	0	0	0	0	0	0	0	6	10	0	0	94	3	139	3	0	0	0	0	0	0	0	2	5	0	5	Bacteria	Firmicutes	Bacilli	Bacillales	Staphylococcaceae	Staphylococcus
ASV_247	0	0	7	8	0	12	0	0	0	0	249	0	0	0	0	0	0	0	0	0	0	0	0	0	0	0	0	0	0	Bacteria	Bacteroidetes	Sphingobacteriia	Sphingobacteriales	Sphingobacteriaceae	Pedobacter
ASV_248	5	8	12	6	7	1	11	0	0	0	0	0	0	0	0	0	0	18	29	0	22	16	29	26	7	5	21	14	15	Bacteria	Actinobacteria	Actinobacteria	Actinomycetales	Nocardioidaceae	Aeromicrobium
ASV_249	244	0	0	0	0	0	0	0	0	0	0	16	0	0	0	0	0	0	0	0	0	0	0	0	0	0	4	0	0	Bacteria	Proteobacteria	Betaproteobacteria	Burkholderiales	Oxalobacteraceae	Massilia
ASV_250	0	0	0	0	0	0	0	0	0	0	0	0	0	0	0	0	8	18	17	32	0	18	96	0	0	19	34	17	11	Bacteria	Proteobacteria	Betaproteobacteria	Burkholderiales	Oxalobacteraceae	unclassified_Oxalobacteraceae
ASV_252	0	0	0	0	0	0	0	0	0	0	0	0	0	0	0	0	21	29	60	16	13	9	43	17	22	13	5	12	7	Bacteria	Actinobacteria	Actinobacteria	Actinomycetales	Streptomycetaceae	Streptomyces
ASV_254	0	7	6	5	3	6	0	0	0	0	0	0	0	0	0	0	0	1	11	6	7	1	1	30	55	58	20	34	10	Bacteria	Actinobacteria	Actinobacteria	Actinomycetales	Micromonosporaceae	Actinoplanes
ASV_255	22	7	0	12	7	0	9	0	0	0	0	9	0	0	0	0	0	10	0	0	0	81	2	0	0	4	28	0	16	Bacteria	Proteobacteria	Alphaproteobacteria	Rhizobiales	Hyphomicrobiaceae	Devosia
ASV_256	0	2	3	0	0	0	0	0	0	0	0	0	0	0	0	0	0	1	14	0	0	29	0	12	4	66	19	35	78	Bacteria	Proteobacteria	Betaproteobacteria	Burkholderiales	Oxalobacteraceae	Herminiimonas
ASV_257	0	0	0	0	0	0	263	0	0	0	0	0	0	0	0	0	0	0	0	0	0	0	0	0	0	0	0	0	0	Bacteria	Proteobacteria	Betaproteobacteria	Burkholderiales	Oxalobacteraceae	Duganella
ASV_258	0	0	0	0	0	0	0	8	7	3	13	37	4	17	13	5	0	0	0	0	0	1	0	0	0	0	0	0	0	Bacteria	unclassified_Bacteria	unclassified_Bacteria	unclassified_Bacteria	unclassified_Bacteria	unclassified_Bacteria
ASV_259	0	0	0	1	0	0	0	0	0	9	0	0	0	0	0	0	6	0	13	4	0	15	22	38	48	75	3	16	12	Bacteria	Actinobacteria	Actinobacteria	Actinomycetales	Streptomycetaceae	Streptomyces
ASV_260	0	5	3	0	0	0	0	0	0	0	0	0	0	0	19	0	0	32	0	117	19	7	25	0	25	0	0	0	0	Bacteria	Actinobacteria	Actinobacteria	Actinomycetales	Streptosporangiaceae	Nonomuraea
ASV_261	0	0	0	0	0	2	0	0	0	0	0	0	0	0	0	0	29	11	0	20	29	17	6	0	0	56	41	29	19	Bacteria	Bacteroidetes	Flavobacteriia	Flavobacteriales	Flavobacteriaceae	Flavobacterium
ASV_263	4	4	0	4	3	0	0	0	0	0	0	0	0	0	0	0	68	15	0	6	23	84	7	3	3	8	13	5	6	Bacteria	Proteobacteria	Betaproteobacteria	Burkholderiales	Comamonadaceae	unclassified_Comamonadaceae
ASV_266	0	1	0	0	0	0	0	0	0	0	0	0	0	0	0	0	28	26	0	141	11	2	3	1	2	20	5	4	7	Bacteria	Proteobacteria	Betaproteobacteria	Burkholderiales	Oxalobacteraceae	unclassified_Oxalobacteraceae
ASV_267	0	0	0	0	0	0	0	0	0	0	0	0	9	0	0	0	4	32	31	10	24	6	33	25	33	20	11	6	8	Bacteria	Actinobacteria	Actinobacteria	Actinomycetales	Pseudonocardiaceae	Lentzea
ASV_268	0	0	0	0	0	0	0	0	0	0	0	0	0	0	0	0	12	13	26	21	21	18	49	11	17	19	7	29	8	Bacteria	Actinobacteria	Actinobacteria	Actinomycetales	unclassified_Actinomycetales	unclassified_Actinomycetales
ASV_269	1	21	6	13	0	0	0	0	0	0	0	0	0	0	0	0	0	9	0	0	0	0	0	0	0	77	33	89	0	Bacteria	Proteobacteria	Betaproteobacteria	Burkholderiales	Oxalobacteraceae	unclassified_Oxalobacteraceae
ASV_270	0	29	19	35	10	41	5	0	0	0	52	0	0	0	0	0	0	2	0	0	0	0	0	0	0	0	11	2	0	Bacteria	Bacteroidetes	Sphingobacteriia	Sphingobacteriales	Sphingobacteriaceae	Pedobacter
ASV_272	0	0	0	0	0	0	0	0	0	0	0	0	0	0	17	0	16	20	6	12	14	18	58	7	2	22	12	20	24	Bacteria	Proteobacteria	Alphaproteobacteria	Rhizobiales	Rhizobiaceae	Rhizobium
ASV_274	0	0	0	0	0	0	0	0	0	0	0	0	0	0	0	0	0	232	2	0	0	0	0	4	0	0	2	0	0	Bacteria	Proteobacteria	Gammaproteobacteria	Xanthomonadales	Xanthomonadaceae	Stenotrophomonas
ASV_275	0	0	0	0	0	0	0	0	0	0	0	0	0	0	0	0	3	8	8	8	5	8	10	22	39	45	24	33	18	Bacteria	Actinobacteria	Actinobacteria	Actinomycetales	Nocardioidaceae	Marmoricola
ASV_276	0	0	0	0	191	0	0	30	0	0	4	0	0	0	0	0	11	0	0	0	0	0	2	0	0	0	0	1	1	Bacteria	Proteobacteria	Gammaproteobacteria	Pseudomonadales	Pseudomonadaceae	Pseudomonas
ASV_277	0	0	0	0	0	0	0	18	0	29	14	21	17	0	14	5	0	0	0	0	0	0	0	0	0	0	0	0	0	Bacteria	unclassified_Bacteria	unclassified_Bacteria	unclassified_Bacteria	unclassified_Bacteria	unclassified_Bacteria
ASV_278	0	0	0	0	0	0	0	0	0	0	0	0	0	0	0	0	17	21	5	74	12	25	4	0	10	6	10	15	43	Bacteria	Firmicutes	Bacilli	Bacillales	Paenibacillaceae 1	unclassified_Paenibacillaceae 1
ASV_279	0	0	0	0	5	0	0	0	0	28	3	0	0	0	0	0	7	8	43	7	11	19	26	36	11	9	6	9	12	Bacteria	Actinobacteria	Actinobacteria	Actinomycetales	Mycobacteriaceae	Mycobacterium
ASV_280	0	0	5	0	0	0	0	0	0	0	0	0	0	0	0	0	0	0	0	232	3	0	0	0	0	0	0	0	0	Bacteria	Proteobacteria	Gammaproteobacteria	Pseudomonadales	Pseudomonadaceae	Pseudomonas
ASV_281	0	0	0	0	0	0	0	0	0	0	0	0	0	0	0	0	0	236	0	4	0	0	0	0	0	0	0	0	0	Bacteria	Bacteroidetes	Flavobacteriia	Flavobacteriales	Flavobacteriaceae	Flavobacterium
ASV_282	0	0	0	0	0	0	0	0	0	0	0	0	0	0	0	0	9	4	0	15	53	92	50	0	0	0	10	0	6	Bacteria	Proteobacteria	Alphaproteobacteria	Sphingomonadales	Sphingomonadaceae	Sphingomonas
ASV_283	0	0	0	0	0	0	0	0	0	0	0	0	0	0	0	0	12	10	33	7	36	14	40	17	24	0	12	25	7	Bacteria	Actinobacteria	Actinobacteria	Actinomycetales	Pseudonocardiaceae	unclassified_Pseudonocardiaceae
ASV_284	0	0	0	0	0	0	0	0	0	0	0	0	0	0	0	0	10	9	0	28	38	46	21	0	0	18	17	28	20	Bacteria	Proteobacteria	Gammaproteobacteria	Xanthomonadales	Xanthomonadaceae	Lysobacter
ASV_285	0	0	0	0	0	0	0	0	0	0	0	0	0	0	0	0	14	14	11	11	5	10	89	23	33	10	3	8	5	Bacteria	Actinobacteria	Actinobacteria	Actinomycetales	Pseudonocardiaceae	Pseudonocardia
ASV_286	0	0	0	0	0	0	0	0	0	0	0	0	0	0	0	0	0	7	14	4	0	18	14	17	50	40	14	48	9	Bacteria	Actinobacteria	Actinobacteria	Actinomycetales	Micromonosporaceae	Actinoplanes
ASV_287	0	0	0	0	0	0	0	0	0	0	0	0	2	0	27	0	15	0	27	19	39	12	30	13	18	7	6	15	3	Bacteria	Actinobacteria	Actinobacteria	Actinomycetales	Geodermatophilaceae	Geodermatophilus
ASV_288	9	5	0	0	7	0	0	0	0	0	32	0	0	19	27	15	9	4	5	0	0	0	14	8	15	8	0	10	0	Bacteria	Actinobacteria	Actinobacteria	Actinomycetales	Geodermatophilaceae	unclassified_Geodermatophilaceae
ASV_289	0	51	39	58	5	20	0	0	0	0	0	0	0	0	0	0	0	0	0	0	0	0	0	0	0	45	13	0	0	Bacteria	Proteobacteria	Betaproteobacteria	Burkholderiales	Oxalobacteraceae	unclassified_Oxalobacteraceae
ASV_290	0	8	34	0	0	13	6	0	0	0	0	0	0	0	0	0	14	3	6	48	18	19	34	0	0	8	11	2	5	Bacteria	Proteobacteria	Betaproteobacteria	Burkholderiales	Oxalobacteraceae	Duganella
ASV_293	2	14	3	5	5	8	6	0	0	0	0	0	0	0	46	9	12	17	0	3	7	7	1	0	0	14	0	17	9	Bacteria	Firmicutes	Bacilli	Bacillales	Bacillaceae 1	Bacillus
ASV_294	0	0	0	0	0	0	0	3	0	0	0	0	0	0	0	181	0	0	0	0	0	0	0	0	0	5	0	0	4	Bacteria	Firmicutes	Bacilli	Lactobacillales	Streptococcaceae	Streptococcus
ASV_295	3	31	10	8	21	70	4	0	0	0	0	0	0	0	0	0	0	7	1	0	0	6	0	11	17	6	8	3	3	Bacteria	Actinobacteria	Actinobacteria	Actinomycetales	Microbacteriaceae	unclassified_Microbacteriaceae
ASV_296	0	0	0	0	0	0	0	0	0	0	0	0	0	0	0	0	23	54	13	8	45	7	31	0	8	6	7	12	9	Bacteria	Actinobacteria	Actinobacteria	Actinomycetales	Streptomycetaceae	unclassified_Streptomycetaceae
ASV_297	0	2	0	0	0	0	0	0	0	0	4	0	0	0	0	0	13	152	0	0	8	5	3	2	1	3	0	7	10	Bacteria	Firmicutes	Bacilli	Bacillales	Paenibacillaceae 1	Paenibacillus
ASV_298	0	0	0	0	0	0	0	0	0	0	0	0	0	0	0	0	0	0	0	0	0	0	0	13	3	0	0	0	200	Bacteria	Proteobacteria	Alphaproteobacteria	Rhizobiales	Phyllobacteriaceae	Phyllobacterium
ASV_299	0	0	0	0	0	0	0	0	43	0	0	41	0	0	0	69	4	0	0	0	0	0	0	0	0	1	0	0	55	Bacteria	Actinobacteria	Actinobacteria	Actinomycetales	Micrococcaceae	Kocuria
ASV_300	113	11	2	7	0	0	4	0	0	0	76	0	0	0	0	0	0	0	0	0	0	0	0	0	0	0	0	0	0	Bacteria	Proteobacteria	Betaproteobacteria	Burkholderiales	Oxalobacteraceae	Massilia
ASV_301	27	21	11	13	1	70	4	0	0	0	0	0	0	0	0	0	0	0	0	26	6	5	0	0	0	2	1	1	4	Bacteria	Bacteroidetes	Sphingobacteriia	Sphingobacteriales	Sphingobacteriaceae	Pedobacter
ASV_302	0	0	0	0	5	0	1	0	0	0	0	0	0	0	0	0	31	15	0	6	23	17	18	18	9	23	17	10	19	Bacteria	Actinobacteria	Actinobacteria	Solirubrobacterales	Solirubrobacteraceae	Solirubrobacter
ASV_303	0	0	0	0	0	0	0	18	0	4	17	20	54	7	21	0	0	0	0	3	0	0	0	0	0	0	0	0	0	Bacteria	unclassified_Bacteria	unclassified_Bacteria	unclassified_Bacteria	unclassified_Bacteria	unclassified_Bacteria
ASV_305	0	0	0	0	0	0	0	0	0	0	0	0	0	0	0	0	0	26	3	113	64	6	0	0	0	0	0	0	0	Bacteria	Bacteroidetes	Sphingobacteriia	Sphingobacteriales	Sphingobacteriaceae	Sphingobacterium
ASV_306	18	24	31	106	2	19	0	0	0	0	0	0	0	0	0	0	0	10	0	0	0	0	1	0	0	0	0	0	0	Bacteria	Proteobacteria	Betaproteobacteria	Burkholderiales	Oxalobacteraceae	Massilia
ASV_307	5	7	10	7	0	1	0	15	0	0	0	0	0	0	0	22	8	4	8	6	17	7	14	10	25	11	14	9	6	Bacteria	Actinobacteria	Actinobacteria	Actinomycetales	Nocardioidaceae	unclassified_Nocardioidaceae
ASV_308	0	0	0	0	0	0	0	0	0	0	0	0	0	0	0	0	0	0	4	40	0	62	68	0	0	2	6	10	17	Bacteria	Proteobacteria	Alphaproteobacteria	Sphingomonadales	Sphingomonadaceae	unclassified_Sphingomonadaceae
ASV_309	0	0	0	0	0	0	0	0	0	0	0	0	0	0	0	0	0	0	0	0	0	0	0	0	0	0	0	209	0	Bacteria	Proteobacteria	Gammaproteobacteria	Enterobacteriales	Enterobacteriaceae	Serratia
ASV_310	0	0	0	0	0	0	0	0	0	0	0	0	0	0	0	0	6	13	35	8	19	15	35	14	21	9	7	13	13	Bacteria	Actinobacteria	Actinobacteria	Actinomycetales	Nocardioidaceae	Aeromicrobium
ASV_311	15	7	108	64	0	0	7	0	0	0	0	0	6	0	0	0	0	0	0	0	0	0	0	0	0	0	0	0	0	Bacteria	Proteobacteria	Betaproteobacteria	Burkholderiales	Oxalobacteraceae	Massilia
ASV_313	0	0	0	0	0	0	0	12	5	8	11	43	9	0	9	5	0	0	0	0	0	0	0	0	0	0	0	0	0	Bacteria	unclassified_Bacteria	unclassified_Bacteria	unclassified_Bacteria	unclassified_Bacteria	unclassified_Bacteria
ASV_314	0	0	0	0	0	0	0	0	0	0	0	0	0	0	0	0	27	27	2	27	64	52	5	0	0	0	0	0	0	Bacteria	Candidatus Saccharibacteria	Saccharibacteria_genera_incertae_sedis	Saccharibacteria_genera_incertae_sedis	Saccharibacteria_genera_incertae_sedis	Saccharibacteria_genera_incertae_sedis
ASV_315	0	49	8	0	0	0	0	0	0	0	0	0	0	0	0	0	0	0	0	0	0	0	0	0	0	0	0	9	136	Bacteria	Bacteroidetes	Sphingobacteriia	Sphingobacteriales	Sphingobacteriaceae	Pedobacter
ASV_316	18	20	7	11	12	5	4	0	0	0	19	0	0	4	12	0	3	9	0	6	10	0	5	9	9	0	0	14	3	Bacteria	Actinobacteria	Actinobacteria	Actinomycetales	Nocardioidaceae	Nocardioides
ASV_317	0	3	6	0	0	6	2	0	0	0	3	0	0	0	0	13	6	9	3	9	23	16	4	0	4	61	4	23	7	Bacteria	Firmicutes	Clostridia	Clostridiales	Clostridiaceae 1	Clostridium sensu stricto
ASV_319	0	0	0	0	0	0	0	4	0	31	7	0	0	0	0	7	0	0	0	0	0	0	0	0	0	0	0	0	0	Bacteria	unclassified_Bacteria	unclassified_Bacteria	unclassified_Bacteria	unclassified_Bacteria	unclassified_Bacteria
ASV_321	0	0	0	0	0	0	0	0	0	0	0	0	0	0	0	0	28	13	3	11	19	32	35	0	1	13	5	20	17	Bacteria	Proteobacteria	Alphaproteobacteria	Rhizobiales	Bradyrhizobiaceae	Rhodopseudomonas
ASV_322	0	0	0	0	0	0	0	0	0	0	0	0	66	0	0	0	0	0	0	0	0	0	0	0	0	0	0	0	0	Bacteria	unclassified_Bacteria	unclassified_Bacteria	unclassified_Bacteria	unclassified_Bacteria	unclassified_Bacteria
ASV_323	13	15	10	2	2	10	3	0	0	10	0	4	0	7	0	0	0	4	0	11	0	5	0	0	0	0	78	11	3	Bacteria	Proteobacteria	Betaproteobacteria	Burkholderiales	Alcaligenaceae	unclassified_Alcaligenaceae
ASV_324	0	13	8	10	3	25	2	0	0	0	0	0	0	0	0	0	0	0	6	2	0	1	21	0	3	17	36	27	19	Bacteria	Proteobacteria	Betaproteobacteria	Burkholderiales	Oxalobacteraceae	Herminiimonas
ASV_325	0	0	0	1	0	0	0	0	0	0	0	0	0	0	0	0	18	7	4	19	37	15	18	19	13	12	9	20	0	Bacteria	Actinobacteria	Actinobacteria	Actinomycetales	Nocardioidaceae	Nocardioides
ASV_326	0	0	0	0	0	0	0	0	0	0	0	0	0	0	0	0	19	13	16	13	19	27	62	0	1	0	11	0	12	Bacteria	Proteobacteria	Betaproteobacteria	Burkholderiales	Comamonadaceae	Variovorax
ASV_327	0	1	0	0	0	0	0	0	0	0	0	0	0	0	0	0	0	48	7	0	21	16	16	0	0	0	0	0	81	Bacteria	Proteobacteria	Alphaproteobacteria	Caulobacterales	Caulobacteraceae	unclassified_Caulobacteraceae
ASV_328	0	0	0	0	0	0	0	0	0	0	0	0	0	0	0	0	22	25	0	59	74	5	7	0	0	0	0	0	0	Bacteria	Bacteroidetes	Sphingobacteriia	Sphingobacteriales	Sphingobacteriaceae	Sphingobacterium
ASV_329	7	11	5	9	3	5	0	0	0	0	0	0	0	0	0	0	7	4	1	0	0	20	4	5	6	32	17	15	33	Bacteria	Proteobacteria	Alphaproteobacteria	Rhizobiales	Methylobacteriaceae	Methylobacterium
ASV_330	0	0	0	0	0	0	0	0	0	0	0	0	0	0	0	0	9	4	0	8	32	5	10	0	3	44	22	35	18	Bacteria	Proteobacteria	Gammaproteobacteria	Xanthomonadales	Xanthomonadaceae	unclassified_Xanthomonadaceae
ASV_331	0	0	0	0	0	0	0	8	5	19	11	20	4	5	14	8	0	0	0	0	0	0	0	0	0	0	0	0	0	Bacteria	unclassified_Bacteria	unclassified_Bacteria	unclassified_Bacteria	unclassified_Bacteria	unclassified_Bacteria
ASV_332	2	4	0	0	3	5	0	0	0	0	7	0	0	4	0	0	20	0	0	16	14	16	13	0	12	11	19	14	13	Bacteria	Actinobacteria	Actinobacteria	Solirubrobacterales	Conexibacteraceae	Conexibacter
ASV_333	0	0	0	0	0	1	0	0	0	0	0	0	0	0	0	0	2	0	1	0	4	17	148	0	2	0	4	7	0	Bacteria	Bacteroidetes	Flavobacteriia	Flavobacteriales	Flavobacteriaceae	Flavobacterium
ASV_334	0	0	0	0	0	0	1	0	0	0	0	0	0	0	0	0	0	6	1	14	0	33	0	0	0	9	116	1	2	Bacteria	Bacteroidetes	Sphingobacteriia	Sphingobacteriales	Sphingobacteriaceae	Pedobacter
ASV_335	0	0	0	0	0	1	0	23	2	0	14	0	45	0	31	4	0	0	0	0	0	0	0	0	0	0	0	0	0	Bacteria	unclassified_Bacteria	unclassified_Bacteria	unclassified_Bacteria	unclassified_Bacteria	unclassified_Bacteria
ASV_336	3	25	65	27	2	15	1	0	0	4	15	0	0	0	0	0	0	0	0	0	0	0	0	0	0	15	0	4	0	Bacteria	Proteobacteria	Betaproteobacteria	Burkholderiales	Oxalobacteraceae	Massilia
ASV_337	0	69	0	1	0	0	92	0	0	5	0	0	0	0	0	0	0	0	0	0	0	0	0	0	0	0	0	0	14	Bacteria	Bacteroidetes	Sphingobacteriia	Sphingobacteriales	Sphingobacteriaceae	Pedobacter
ASV_338	0	0	0	0	0	0	0	0	0	0	0	0	0	0	0	0	12	59	3	7	30	14	32	0	2	6	4	9	1	Bacteria	Proteobacteria	Alphaproteobacteria	Rhizobiales	Rhizobiaceae	Rhizobium
ASV_339	0	0	0	2	0	0	0	0	0	0	0	0	0	0	0	0	13	14	15	4	14	9	17	16	25	11	9	18	10	Bacteria	Actinobacteria	Actinobacteria	Actinomycetales	Nocardioidaceae	Nocardioides
ASV_341	0	0	0	1	0	0	0	0	0	0	0	0	0	0	0	0	24	6	5	8	41	11	3	16	13	6	7	25	10	Bacteria	Actinobacteria	Actinobacteria	Actinomycetales	Nocardioidaceae	Nocardioides
ASV_342	48	23	9	15	2	39	0	0	0	0	0	0	0	0	0	0	0	0	0	37	0	1	0	0	0	0	0	0	0	Bacteria	Bacteroidetes	Sphingobacteriia	Sphingobacteriales	Sphingobacteriaceae	Pedobacter
ASV_343	0	0	0	0	76	36	0	0	0	0	0	0	0	0	0	0	0	0	0	0	0	0	0	0	0	0	0	0	0	Bacteria	Proteobacteria	Gammaproteobacteria	Pseudomonadales	Pseudomonadaceae	Pseudomonas
ASV_344	0	0	0	0	0	0	0	0	0	0	0	0	0	0	0	0	12	11	0	11	25	19	15	0	0	19	14	28	20	Bacteria	Acidobacteria	Acidobacteria_Gp4	Aridibacter	Aridibacter	Aridibacter
ASV_345	4	9	0	8	9	0	0	0	0	0	0	0	0	0	0	0	9	20	0	10	11	6	6	14	10	10	2	37	5	Bacteria	unclassified_Bacteria	unclassified_Bacteria	unclassified_Bacteria	unclassified_Bacteria	unclassified_Bacteria
ASV_346	0	0	0	0	0	0	0	9	4	0	7	22	11	7	14	5	0	0	0	0	0	0	0	0	0	0	0	0	0	Bacteria	unclassified_Bacteria	unclassified_Bacteria	unclassified_Bacteria	unclassified_Bacteria	unclassified_Bacteria
ASV_348	0	0	0	0	0	0	0	0	0	0	0	0	0	0	0	0	20	28	0	17	13	19	3	0	0	23	12	23	14	Bacteria	Candidatus Saccharibacteria	Saccharibacteria_genera_incertae_sedis	Saccharibacteria_genera_incertae_sedis	Saccharibacteria_genera_incertae_sedis	Saccharibacteria_genera_incertae_sedis
ASV_349	70	0	0	5	0	0	0	0	0	0	0	0	0	0	0	0	8	3	0	5	80	0	0	0	0	0	0	0	0	Bacteria	Proteobacteria	Gammaproteobacteria	Pseudomonadales	Pseudomonadaceae	Pseudomonas
ASV_350	0	0	0	0	0	0	0	0	0	0	0	0	0	0	0	0	5	10	6	32	26	8	38	0	0	8	10	19	7	Bacteria	Proteobacteria	Alphaproteobacteria	Caulobacterales	Caulobacteraceae	Caulobacter
ASV_351	0	7	3	5	0	3	0	0	0	0	0	0	0	0	0	0	20	0	0	0	0	3	0	0	0	27	10	84	9	Bacteria	Proteobacteria	Betaproteobacteria	Burkholderiales	Oxalobacteraceae	unclassified_Oxalobacteraceae
ASV_352	0	0	17	74	0	0	0	0	0	0	0	0	0	0	0	0	0	0	0	0	0	0	0	0	0	56	0	0	0	Bacteria	Proteobacteria	Betaproteobacteria	Burkholderiales	Oxalobacteraceae	Massilia
ASV_353	0	9	0	8	3	0	0	0	0	0	5	0	0	0	0	0	4	7	3	11	7	18	0	0	7	37	12	30	0	Bacteria	Proteobacteria	Betaproteobacteria	Burkholderiales	Oxalobacteraceae	unclassified_Oxalobacteraceae
ASV_354	0	4	0	0	0	0	0	0	0	0	0	0	0	0	0	0	10	4	0	0	1	0	1	24	21	58	16	17	8	Bacteria	Actinobacteria	Actinobacteria	Solirubrobacterales	unclassified_Solirubrobacterales	unclassified_Solirubrobacterales
ASV_355	0	5	3	0	7	0	0	0	0	0	0	17	0	0	0	0	7	0	19	9	12	9	14	3	3	8	2	7	0	Bacteria	Actinobacteria	Actinobacteria	Actinomycetales	Pseudonocardiaceae	Pseudonocardia
ASV_356	17	3	4	0	0	2	0	5	0	0	10	0	0	0	0	0	14	12	0	0	9	3	11	0	3	34	16	16	4	Bacteria	Proteobacteria	Alphaproteobacteria	Rhizobiales	Rhizobiaceae	unclassified_Rhizobiaceae
ASV_357	45	12	0	0	41	0	0	0	0	0	0	0	0	0	0	0	0	0	0	25	0	32	3	0	0	0	3	0	2	Bacteria	Bacteroidetes	Sphingobacteriia	Sphingobacteriales	Sphingobacteriaceae	Pedobacter
ASV_358	0	0	0	0	0	0	0	0	0	0	0	0	0	0	0	0	0	7	0	0	0	10	16	5	10	26	33	27	29	Bacteria	Actinobacteria	Actinobacteria	Actinomycetales	Cryptosporangiaceae	Jatrophihabitans
ASV_359	0	1	3	0	2	5	1	0	0	0	0	0	7	12	0	0	16	12	1	13	7	4	5	5	5	17	13	12	12	Bacteria	Firmicutes	Bacilli	Bacillales	Bacillaceae 1	Bacillus
ASV_360	0	0	0	0	0	0	0	0	0	0	0	0	0	0	0	0	0	0	0	160	0	0	0	0	0	0	0	0	0	Bacteria	Bacteroidetes	Sphingobacteriia	Sphingobacteriales	Sphingobacteriaceae	Sphingobacterium
ASV_361	0	0	0	0	0	0	0	0	0	0	0	0	0	0	0	0	122	5	6	7	0	5	11	0	0	0	0	0	0	Bacteria	Actinobacteria	Actinobacteria	Actinomycetales	Streptomycetaceae	Streptomyces
ASV_362	11	8	9	5	6	5	6	9	0	7	0	20	0	0	8	5	0	5	0	0	0	0	0	1	2	0	1	3	2	Bacteria	Actinobacteria	Actinobacteria	Actinomycetales	Microbacteriaceae	Rathayibacter
ASV_364	0	0	0	0	0	0	0	0	0	0	0	0	0	0	0	0	5	0	0	14	9	16	10	0	4	17	29	43	7	Bacteria	Proteobacteria	Gammaproteobacteria	Xanthomonadales	Xanthomonadaceae	Arenimonas
ASV_366	0	1	0	0	0	4	0	0	0	0	3	0	0	0	0	0	0	1	0	0	3	0	0	0	0	0	8	8	124	Bacteria	Bacteroidetes	Sphingobacteriia	Sphingobacteriales	Sphingobacteriaceae	Pedobacter
ASV_367	0	0	0	0	0	0	0	0	0	0	0	0	0	0	0	0	4	0	25	0	13	17	32	3	12	7	7	21	11	Bacteria	Actinobacteria	Actinobacteria	Actinomycetales	Nocardioidaceae	Aeromicrobium
ASV_368	8	13	0	0	0	0	0	0	0	0	0	0	0	0	0	0	11	13	22	7	20	11	13	8	8	11	0	0	6	Bacteria	Actinobacteria	Actinobacteria	Actinomycetales	Geodermatophilaceae	Modestobacter
ASV_369	6	5	2	7	2	0	1	0	0	11	0	0	0	0	0	0	0	0	0	0	0	2	0	3	2	0	11	7	13	Bacteria	Proteobacteria	Alphaproteobacteria	Rhizobiales	Methylobacteriaceae	Methylobacterium
ASV_370	0	26	17	12	0	5	0	0	0	0	0	0	0	0	0	0	0	3	0	0	2	0	0	0	0	42	6	30	3	Bacteria	Proteobacteria	Betaproteobacteria	Burkholderiales	Oxalobacteraceae	Massilia
ASV_372	0	0	5	0	8	13	0	0	0	0	0	0	0	8	11	10	16	7	0	16	20	0	0	0	0	13	0	20	1	Bacteria	Actinobacteria	Actinobacteria	Gaiellales	Gaiellaceae	Gaiella
ASV_373	0	0	0	0	0	0	0	0	0	0	0	0	0	0	0	0	0	0	0	0	0	0	0	0	0	0	148	0	0	Bacteria	Proteobacteria	Gammaproteobacteria	Xanthomonadales	Xanthomonadaceae	Stenotrophomonas
ASV_374	55	5	0	2	42	2	0	0	0	0	0	0	0	0	0	0	0	0	0	13	0	25	0	0	0	0	1	0	2	Bacteria	Bacteroidetes	Sphingobacteriia	Sphingobacteriales	Sphingobacteriaceae	Pedobacter
ASV_375	1	0	0	0	0	0	0	0	0	0	15	0	0	0	27	0	0	2	1	2	2	88	4	0	0	1	0	0	0	Bacteria	Firmicutes	Bacilli	Bacillales	Bacillaceae 1	Bacillus
ASV_376	0	50	15	2	9	0	0	0	0	0	0	0	0	0	63	0	0	0	0	0	0	0	0	0	0	0	2	0	0	Bacteria	Proteobacteria	Betaproteobacteria	Burkholderiales	Oxalobacteraceae	unclassified_Oxalobacteraceae
ASV_377	0	0	0	2	0	0	0	0	0	30	7	0	0	0	9	3	6	17	0	0	0	4	2	0	0	4	0	0	6	Bacteria	Actinobacteria	Actinobacteria	Actinomycetales	Micrococcaceae	Micrococcus
ASV_378	0	0	0	0	0	0	0	0	0	0	0	0	0	0	0	0	15	12	3	27	16	14	8	0	0	4	22	14	8	Bacteria	Bacteroidetes	Sphingobacteriia	Sphingobacteriales	Sphingobacteriaceae	Mucilaginibacter
ASV_379	0	0	0	0	0	0	0	0	0	0	0	0	0	0	0	0	0	3	0	0	6	0	6	0	0	0	105	23	0	Bacteria	Proteobacteria	Gammaproteobacteria	Pseudomonadales	Pseudomonadaceae	Pseudomonas
ASV_380	0	0	1	0	0	0	0	0	0	0	0	0	0	0	0	0	2	0	32	4	24	22	20	14	11	0	8	0	2	Bacteria	Actinobacteria	Actinobacteria	Actinomycetales	Nocardioidaceae	Nocardioides
ASV_381	0	28	14	11	0	9	3	0	0	4	0	0	0	0	13	0	4	0	0	0	0	0	1	0	0	16	7	14	0	Bacteria	Proteobacteria	Betaproteobacteria	Burkholderiales	Oxalobacteraceae	Massilia
ASV_382	0	12	0	0	0	4	0	0	0	0	11	0	0	0	4	0	7	0	18	0	0	9	16	17	8	4	7	19	6	Bacteria	Actinobacteria	Actinobacteria	Actinomycetales	Geodermatophilaceae	Geodermatophilus
ASV_383	0	2	0	0	0	0	0	0	0	0	0	0	0	0	0	0	0	0	6	0	0	2	0	0	7	18	15	41	38	Bacteria	Actinobacteria	Actinobacteria	Actinomycetales	Intrasporangiaceae	unclassified_Intrasporangiaceae
ASV_385	0	0	0	0	0	0	0	0	0	0	0	0	0	0	0	0	0	0	0	4	10	0	0	8	52	0	8	59	0	Bacteria	Actinobacteria	Actinobacteria	Actinomycetales	Nocardioidaceae	unclassified_Nocardioidaceae
ASV_388	17	15	4	10	9	0	0	0	0	0	0	29	0	0	0	0	0	1	0	0	16	4	10	10	13	0	0	0	0	Bacteria	Actinobacteria	Actinobacteria	Actinomycetales	unclassified_Actinomycetales	unclassified_Actinomycetales
ASV_390	0	0	0	0	0	0	0	0	0	0	0	0	0	0	0	0	139	0	0	0	0	0	0	0	0	0	0	0	0	Bacteria	Proteobacteria	Gammaproteobacteria	Xanthomonadales	Xanthomonadaceae	Stenotrophomonas
ASV_391	3	1	0	3	0	0	0	0	0	0	0	0	0	0	0	0	4	0	8	8	0	0	17	12	63	6	10	0	3	Bacteria	Actinobacteria	Actinobacteria	Actinomycetales	Streptosporangiaceae	Nonomuraea
ASV_392	0	0	0	0	0	0	0	0	0	0	0	0	0	0	0	0	42	44	0	26	13	4	0	0	0	0	0	0	5	Bacteria	Firmicutes	Bacilli	Bacillales	Paenibacillaceae 1	unclassified_Paenibacillaceae 1
ASV_393	0	0	0	0	0	0	0	0	0	0	0	0	0	0	0	0	22	15	0	18	4	3	25	0	4	17	1	4	25	Bacteria	Actinobacteria	Actinobacteria	Actinomycetales	Glycomycetaceae	Glycomyces
ASV_394	5	0	5	4	10	0	0	0	0	12	22	0	0	0	0	12	6	6	0	0	11	5	16	6	6	6	0	0	5	Bacteria	Actinobacteria	Actinobacteria	Actinomycetales	Geodermatophilaceae	Geodermatophilus
ASV_395	0	0	0	0	0	0	0	8	0	29	8	8	6	0	4	3	0	0	0	0	0	0	0	0	0	0	0	0	0	Bacteria	unclassified_Bacteria	unclassified_Bacteria	unclassified_Bacteria	unclassified_Bacteria	unclassified_Bacteria
ASV_397	0	0	0	2	0	0	1	0	0	0	0	0	0	0	0	0	19	6	3	5	11	4	3	19	16	12	8	20	7	Bacteria	Actinobacteria	Actinobacteria	Actinomycetales	Nocardioidaceae	Nocardioides
ASV_398	0	0	0	0	0	0	136	0	0	0	0	0	0	0	0	0	0	0	0	0	0	0	0	0	0	0	0	0	0	Bacteria	Proteobacteria	Betaproteobacteria	Burkholderiales	Oxalobacteraceae	unclassified_Oxalobacteraceae
ASV_399	0	0	0	0	0	0	0	0	5	0	2	8	0	0	3	14	0	0	0	0	0	0	0	0	0	0	0	0	0	Bacteria	unclassified_Bacteria	unclassified_Bacteria	unclassified_Bacteria	unclassified_Bacteria	unclassified_Bacteria
ASV_400	0	0	0	0	0	0	0	0	0	0	0	0	0	0	20	0	8	5	5	8	13	6	6	17	14	8	4	12	10	Bacteria	Chloroflexi	Thermomicrobia	Sphaerobacterales	Sphaerobacteraceae	unclassified_Sphaerobacteraceae
ASV_401	0	0	0	0	0	0	0	0	0	0	0	0	0	0	0	0	12	2	0	13	47	14	5	0	0	10	11	19	3	Bacteria	Proteobacteria	Gammaproteobacteria	Xanthomonadales	Xanthomonadaceae	Arenimonas
ASV_402	0	0	0	0	0	0	0	0	0	0	0	0	0	0	0	0	7	7	4	23	6	12	5	0	0	44	4	15	9	Bacteria	Proteobacteria	Betaproteobacteria	Burkholderiales	Oxalobacteraceae	unclassified_Oxalobacteraceae
ASV_403	0	7	0	0	0	0	0	0	0	0	0	0	0	0	0	0	0	12	0	0	1	5	6	0	0	55	15	0	9	Bacteria	Proteobacteria	Betaproteobacteria	Burkholderiales	Comamonadaceae	unclassified_Comamonadaceae
ASV_404	0	0	0	0	0	0	0	0	0	0	0	0	0	0	0	0	0	0	0	0	0	0	0	9	4	6	10	43	63	Bacteria	Actinobacteria	Actinobacteria	Actinomycetales	Intrasporangiaceae	unclassified_Intrasporangiaceae
ASV_405	0	8	0	0	3	0	0	0	0	0	0	0	0	2	0	0	10	12	9	6	6	0	18	12	9	7	15	5	12	Bacteria	Actinobacteria	Actinobacteria	Solirubrobacterales	unclassified_Solirubrobacterales	unclassified_Solirubrobacterales
ASV_407	0	3	0	0	0	0	1	0	0	0	0	0	0	0	0	0	0	13	10	32	0	2	12	5	3	2	39	11	0	Bacteria	Proteobacteria	Gammaproteobacteria	Pseudomonadales	Pseudomonadaceae	Pseudomonas
ASV_408	0	0	0	0	0	0	0	0	0	0	0	0	0	0	0	0	0	3	17	10	20	20	30	5	11	10	0	0	7	Bacteria	Actinobacteria	Actinobacteria	Actinomycetales	Kineosporiaceae	Angustibacter
ASV_410	0	0	0	0	0	0	0	0	0	0	0	0	0	7	49	0	0	0	0	0	0	9	10	3	10	14	3	12	0	Bacteria	Firmicutes	Bacilli	Bacillales	Bacillaceae 1	Bacillus
ASV_412	2	29	3	1	8	11	2	0	0	0	0	0	0	0	0	0	0	0	0	7	0	6	1	0	8	0	19	16	15	Bacteria	Proteobacteria	Alphaproteobacteria	Rhizobiales	Hyphomicrobiaceae	Devosia
ASV_413	0	0	0	0	0	5	0	0	0	0	0	0	0	0	0	0	0	0	0	4	0	0	0	3	10	55	12	26	12	Bacteria	Proteobacteria	Betaproteobacteria	Burkholderiales	Oxalobacteraceae	unclassified_Oxalobacteraceae
ASV_415	0	0	0	0	0	0	0	0	0	0	0	0	0	0	0	0	8	11	0	16	16	5	4	0	13	16	0	38	0	Bacteria	Actinobacteria	Actinobacteria	Actinomycetales	Nocardioidaceae	Nocardioides
ASV_416	1	0	0	0	0	0	0	0	0	0	0	0	0	0	0	0	9	0	0	12	5	7	0	6	22	13	14	20	17	Bacteria	Actinobacteria	unclassified_Actinobacteria	unclassified_Actinobacteria	unclassified_Actinobacteria	unclassified_Actinobacteria
ASV_417	5	4	0	3	10	1	2	0	0	3	14	0	0	0	0	0	8	5	1	12	19	0	12	4	5	2	6	3	3	Bacteria	Actinobacteria	Actinobacteria	Actinomycetales	Nocardioidaceae	Nocardioides
ASV_418	17	6	2	4	10	5	4	1	0	0	0	2	0	0	0	0	0	7	0	0	0	0	0	2	7	16	10	23	8	Bacteria	Actinobacteria	Actinobacteria	Actinomycetales	Microbacteriaceae	unclassified_Microbacteriaceae
ASV_419	7	3	0	0	6	4	7	0	0	0	0	0	0	0	0	0	6	8	5	12	9	4	15	11	7	7	2	6	3	Bacteria	Actinobacteria	Actinobacteria	Actinomycetales	Nocardioidaceae	Marmoricola
ASV_420	0	0	0	0	3	0	0	0	0	0	0	0	0	0	0	0	43	0	0	9	11	0	9	3	11	22	4	9	0	Bacteria	Actinobacteria	Actinobacteria	Actinomycetales	Micromonosporaceae	Micromonospora
ASV_422	0	0	4	0	0	0	0	0	0	0	0	0	0	0	0	0	0	28	0	16	29	0	14	0	0	7	13	12	0	Bacteria	Proteobacteria	Betaproteobacteria	Burkholderiales	Comamonadaceae	unclassified_Comamonadaceae
ASV_424	0	0	0	0	0	0	0	0	0	0	0	0	0	0	0	0	0	0	0	0	25	0	13	0	0	31	14	29	11	Bacteria	Proteobacteria	Gammaproteobacteria	Xanthomonadales	Xanthomonadaceae	Luteimonas
ASV_425	0	4	0	0	3	3	0	0	0	0	0	0	0	3	0	0	0	8	0	1	6	4	3	0	0	4	4	18	16	Bacteria	Firmicutes	Bacilli	Bacillales	Bacillaceae 1	Bacillus
ASV_426	0	0	0	0	0	0	0	0	0	0	0	0	0	0	0	0	7	7	0	13	15	6	0	6	6	20	16	17	9	Bacteria	Actinobacteria	Actinobacteria	Actinomycetales	Nocardioidaceae	Nocardioides
ASV_427	4	5	2	7	1	9	5	0	0	0	0	0	0	0	39	0	0	0	0	0	2	4	2	0	0	6	3	0	5	Bacteria	Proteobacteria	Alphaproteobacteria	Rhodospirillales	Acetobacteraceae	Roseomonas
ASV_428	4	10	2	5	4	0	4	0	0	0	0	0	0	0	42	0	1	0	0	0	0	0	2	0	0	7	2	0	3	Bacteria	Proteobacteria	Alphaproteobacteria	Rhizobiales	Methylobacteriaceae	Methylobacterium
ASV_429	0	0	0	0	0	0	0	0	0	0	0	0	0	0	0	0	20	6	3	6	22	10	7	6	2	6	11	16	5	Bacteria	Proteobacteria	Gammaproteobacteria	Pseudomonadales	Pseudomonadaceae	Rhizobacter
ASV_430	3	9	7	13	10	17	12	0	0	0	0	0	0	3	20	0	0	0	0	0	0	0	0	0	10	12	0	0	3	Bacteria	Actinobacteria	Actinobacteria	Actinomycetales	Thermomonosporaceae	Actinoallomurus
ASV_431	0	0	0	0	1	0	0	0	0	0	0	0	0	0	31	0	6	18	2	17	11	5	13	0	0	3	0	12	0	Bacteria	unclassified_Bacteria	unclassified_Bacteria	unclassified_Bacteria	unclassified_Bacteria	unclassified_Bacteria
ASV_432	9	5	2	3	1	3	4	0	0	0	8	0	0	0	8	0	8	0	1	0	0	2	0	0	4	11	0	0	0	Bacteria	Proteobacteria	Alphaproteobacteria	Rhizobiales	Methylobacteriaceae	Methylobacterium
ASV_433	2	10	1	0	0	2	0	0	0	0	7	0	0	0	0	0	3	3	0	6	0	8	0	0	2	25	5	26	13	Bacteria	Proteobacteria	Betaproteobacteria	Burkholderiales	Oxalobacteraceae	unclassified_Oxalobacteraceae
ASV_435	7	9	0	6	7	8	0	0	0	0	12	0	0	0	19	0	10	0	0	0	0	0	11	0	10	0	4	12	0	Bacteria	Actinobacteria	Actinobacteria	Actinomycetales	Geodermatophilaceae	Blastococcus
ASV_436	0	0	0	0	0	0	0	0	0	0	0	0	0	0	0	0	0	0	12	0	0	17	13	40	10	0	12	0	11	Bacteria	Actinobacteria	Actinobacteria	Actinomycetales	Micromonosporaceae	unclassified_Micromonosporaceae
ASV_437	0	25	0	7	3	0	6	2	0	0	0	0	0	0	0	0	0	0	0	0	0	8	0	5	0	6	17	0	7	Bacteria	Proteobacteria	Alphaproteobacteria	Rhizobiales	Hyphomicrobiaceae	Devosia
ASV_438	0	3	0	0	0	0	0	0	0	0	7	0	0	0	0	0	9	12	9	10	9	7	10	14	11	5	0	0	3	Bacteria	Actinobacteria	Actinobacteria	Actinomycetales	Pseudonocardiaceae	Pseudonocardia
ASV_441	0	0	113	0	0	0	0	0	0	0	0	0	0	0	0	0	0	0	0	0	0	0	0	0	0	0	0	0	0	Bacteria	Proteobacteria	Betaproteobacteria	Burkholderiales	Oxalobacteraceae	Janthinobacterium
ASV_442	0	0	0	0	0	0	0	0	0	0	0	0	0	0	0	0	7	0	8	6	11	5	23	8	12	5	0	21	7	Bacteria	Actinobacteria	Actinobacteria	Actinomycetales	Nocardioidaceae	Aeromicrobium
ASV_443	0	12	3	22	2	4	0	16	0	0	0	0	0	3	0	0	7	0	0	0	1	2	0	0	0	0	7	0	3	Bacteria	Bacteroidetes	Cytophagia	Cytophagales	Cytophagaceae	Dyadobacter
ASV_444	1	0	0	0	0	0	0	0	0	0	0	0	0	0	0	0	8	6	0	17	15	12	21	0	11	0	4	15	0	Bacteria	Acidobacteria	Acidobacteria_Gp16	Gp16	Gp16	Gp16
ASV_446	0	0	0	0	0	0	0	0	0	0	0	0	0	0	0	0	9	9	9	0	30	12	13	7	9	6	0	0	7	Bacteria	Actinobacteria	Actinobacteria	Actinomycetales	Mycobacteriaceae	Mycobacterium
ASV_447	2	9	50	0	8	11	0	0	0	0	0	0	0	0	8	0	0	0	0	0	0	0	0	0	1	7	6	2	0	Bacteria	Proteobacteria	Gammaproteobacteria	Pseudomonadales	Pseudomonadaceae	Pseudomonas
ASV_449	2	2	0	1	2	0	0	0	0	0	9	0	0	0	0	0	5	10	11	2	10	3	12	10	13	4	3	0	10	Bacteria	Actinobacteria	Actinobacteria	Actinomycetales	Mycobacteriaceae	Mycobacterium
ASV_450	0	6	1	0	0	0	0	0	0	0	4	4	0	0	0	4	0	5	0	0	5	2	6	3	0	16	3	9	32	Bacteria	Proteobacteria	Alphaproteobacteria	Rhizobiales	Methylobacteriaceae	Methylobacterium
ASV_451	0	3	0	0	0	0	0	0	0	0	0	0	0	0	0	0	0	0	0	0	0	0	0	0	0	0	0	0	104	Bacteria	Bacteroidetes	Sphingobacteriia	Sphingobacteriales	Sphingobacteriaceae	Pedobacter
ASV_454	0	0	0	0	0	0	0	0	0	0	0	0	0	107	0	0	0	0	0	0	0	0	0	0	0	0	0	0	0	Bacteria	Proteobacteria	Gammaproteobacteria	Xanthomonadales	Xanthomonadaceae	Luteimonas
ASV_455	0	0	5	0	0	0	6	15	0	0	0	0	0	0	0	0	3	0	0	1	8	2	3	3	3	3	5	16	3	Bacteria	Actinobacteria	Actinobacteria	Actinomycetales	unclassified_Actinomycetales	unclassified_Actinomycetales
ASV_456	0	0	0	0	0	0	0	0	0	0	0	0	0	0	0	0	0	0	0	0	0	0	0	0	0	29	37	39	1	Bacteria	Proteobacteria	Betaproteobacteria	Burkholderiales	Oxalobacteraceae	Massilia
ASV_457	4	6	1	3	3	3	0	0	0	17	0	0	0	0	5	0	0	19	0	0	9	0	0	0	0	12	15	8	0	Bacteria	Proteobacteria	Alphaproteobacteria	Caulobacterales	Caulobacteraceae	Brevundimonas
ASV_458	0	1	1	0	0	0	0	0	0	20	0	0	0	0	0	8	4	5	0	11	5	5	15	0	3	7	4	7	9	Bacteria	Actinobacteria	Actinobacteria	Gaiellales	Gaiellaceae	Gaiella
ASV_459	4	15	48	8	3	4	5	0	0	0	0	0	0	0	0	0	0	5	0	0	0	0	3	0	0	2	2	1	0	Bacteria	Proteobacteria	Betaproteobacteria	Burkholderiales	Oxalobacteraceae	unclassified_Oxalobacteraceae
ASV_460	0	5	0	0	2	6	0	0	0	0	0	0	0	6	0	0	4	0	0	0	0	0	1	9	16	11	11	11	3	Bacteria	Actinobacteria	Actinobacteria	Actinomycetales	Thermomonosporaceae	Actinoallomurus
ASV_461	0	10	4	0	0	4	0	0	0	0	0	0	0	0	12	0	5	3	0	0	0	0	1	0	0	23	5	22	14	Bacteria	Proteobacteria	Betaproteobacteria	Burkholderiales	Oxalobacteraceae	Noviherbaspirillum
ASV_462	0	0	4	1	0	0	3	0	0	0	0	0	0	2	11	0	21	3	4	3	7	1	6	4	22	0	6	5	0	Bacteria	Actinobacteria	Actinobacteria	Actinomycetales	Thermomonosporaceae	Actinoallomurus
ASV_463	0	0	0	0	0	0	0	0	0	0	0	0	0	0	0	0	13	8	8	0	6	13	11	9	4	0	14	17	0	Bacteria	Actinobacteria	Actinobacteria	Acidimicrobiales	Iamiaceae	unclassified_Iamiaceae
ASV_464	0	0	0	0	0	0	0	0	0	0	0	0	0	0	0	81	0	0	0	0	0	0	0	0	0	0	0	0	0	Bacteria	Actinobacteria	Actinobacteria	Actinomycetales	Micrococcaceae	Rothia
ASV_466	0	0	0	0	0	0	0	0	0	0	0	0	0	0	0	0	7	5	0	55	8	0	14	0	1	0	3	0	8	Bacteria	Actinobacteria	Actinobacteria	Actinomycetales	Nocardiaceae	Nocardia
ASV_467	3	8	32	0	1	9	0	0	0	0	0	0	0	0	0	0	31	1	0	0	0	0	0	0	0	0	5	2	6	Bacteria	Proteobacteria	Betaproteobacteria	Burkholderiales	Oxalobacteraceae	Duganella
ASV_468	0	10	6	4	2	0	0	0	0	26	0	0	0	0	9	0	1	0	0	0	3	0	0	0	2	9	10	13	0	Bacteria	Proteobacteria	Betaproteobacteria	Burkholderiales	Oxalobacteraceae	Noviherbaspirillum
ASV_469	0	0	0	0	0	0	0	0	0	0	0	0	0	0	0	25	2	4	13	1	0	3	7	13	4	0	1	2	2	Bacteria	Actinobacteria	Actinobacteria	Actinomycetales	Mycobacteriaceae	Mycobacterium
ASV_470	0	0	0	0	0	0	0	0	0	0	11	0	0	0	0	0	0	13	0	8	13	0	17	8	20	0	0	10	0	Bacteria	Actinobacteria	Actinobacteria	Actinomycetales	Thermomonosporaceae	Actinomadura
ASV_471	0	1	0	0	2	0	0	0	0	0	0	0	0	0	0	0	10	3	7	6	12	13	14	4	2	5	3	3	8	Bacteria	Actinobacteria	Actinobacteria	Actinomycetales	Nocardioidaceae	Nocardioides
ASV_472	23	10	5	5	10	5	3	1	0	0	0	1	0	0	0	0	0	5	0	0	0	0	0	3	2	11	4	7	3	Bacteria	Actinobacteria	Actinobacteria	Actinomycetales	Microbacteriaceae	unclassified_Microbacteriaceae
ASV_473	12	13	0	0	0	0	2	0	0	0	12	0	0	0	0	0	9	0	0	1	0	0	5	0	0	0	18	26	0	Bacteria	Proteobacteria	Betaproteobacteria	Burkholderiales	Oxalobacteraceae	Noviherbaspirillum
ASV_474	0	0	0	0	0	1	0	0	0	0	0	0	0	0	0	0	0	10	0	27	45	6	0	1	0	4	4	0	0	Bacteria	Proteobacteria	Gammaproteobacteria	Xanthomonadales	Xanthomonadaceae	Luteibacter
ASV_475	1	4	0	0	4	3	0	0	0	0	0	0	0	13	0	0	3	0	0	0	2	0	2	0	5	8	4	25	9	Bacteria	Firmicutes	Bacilli	Bacillales	Bacillaceae 1	Bacillus
ASV_476	0	0	0	0	13	0	3	0	0	0	0	9	5	0	35	6	0	0	0	8	0	0	13	0	0	0	0	0	2	Bacteria	Actinobacteria	Actinobacteria	Actinomycetales	Geodermatophilaceae	unclassified_Geodermatophilaceae
ASV_478	0	0	0	0	0	0	0	0	0	0	0	0	0	0	0	0	97	0	0	0	0	0	0	0	0	0	0	0	0	Bacteria	Proteobacteria	Gammaproteobacteria	Pseudomonadales	Pseudomonadaceae	Pseudomonas
ASV_479	0	0	0	0	0	0	0	0	0	0	0	0	0	0	0	0	0	0	0	0	0	0	0	0	97	0	0	0	0	Bacteria	Actinobacteria	Actinobacteria	Actinomycetales	Micromonosporaceae	unclassified_Micromonosporaceae
ASV_480	0	0	0	0	3	0	0	0	0	20	0	15	0	0	30	0	0	0	3	3	3	0	7	0	0	0	0	0	0	Bacteria	Actinobacteria	Actinobacteria	Actinomycetales	Pseudonocardiaceae	Pseudonocardia
ASV_481	0	0	0	0	0	0	0	0	0	0	0	0	0	0	0	0	0	2	0	0	11	4	12	0	0	5	13	37	11	Bacteria	Proteobacteria	Alphaproteobacteria	Sphingomonadales	Sphingomonadaceae	Sphingomonas
ASV_482	0	0	0	0	0	0	0	0	0	0	0	0	0	0	0	0	0	0	0	0	0	0	0	0	0	0	0	0	95	Bacteria	Bacteroidetes	Sphingobacteriia	Sphingobacteriales	Sphingobacteriaceae	Pedobacter
ASV_483	3	66	10	0	0	1	7	0	0	0	0	0	0	0	0	0	0	0	0	0	0	0	0	0	0	0	0	0	0	Bacteria	Proteobacteria	Betaproteobacteria	Burkholderiales	Oxalobacteraceae	Massilia
ASV_485	0	0	0	0	0	0	0	0	0	0	0	0	0	0	0	0	2	32	1	5	29	12	0	0	0	0	3	2	5	Bacteria	Proteobacteria	Betaproteobacteria	Burkholderiales	Comamonadaceae	Polaromonas
ASV_486	0	18	12	9	3	15	0	8	0	0	0	0	0	0	0	0	0	19	0	0	0	0	0	0	0	0	9	0	0	Bacteria	Bacteroidetes	Sphingobacteriia	Sphingobacteriales	Sphingobacteriaceae	Pedobacter
ASV_487	0	0	0	0	0	0	1	0	0	0	5	0	0	0	0	0	10	11	2	20	11	4	6	0	8	0	3	8	4	Bacteria	unclassified_Bacteria	unclassified_Bacteria	unclassified_Bacteria	unclassified_Bacteria	unclassified_Bacteria
ASV_488	0	0	0	0	0	0	0	0	0	0	0	0	0	0	37	0	3	0	8	0	0	0	5	10	15	0	7	0	8	Bacteria	Actinobacteria	Actinobacteria	unclassified_Actinobacteria	unclassified_Actinobacteria	unclassified_Actinobacteria
ASV_489	66	5	3	0	0	0	0	0	0	0	0	0	0	0	0	0	0	0	0	0	0	0	0	0	0	0	17	0	0	Bacteria	Bacteroidetes	Flavobacteriia	Flavobacteriales	Flavobacteriaceae	Flavobacterium
ASV_491	0	25	0	1	6	0	0	5	0	0	0	0	0	0	0	0	0	2	0	6	0	0	0	0	0	0	35	2	9	Bacteria	Bacteroidetes	Sphingobacteriia	Sphingobacteriales	Sphingobacteriaceae	Pedobacter
ASV_492	0	2	0	0	0	0	0	0	0	0	0	0	0	0	0	0	3	7	0	11	0	4	0	0	0	12	26	17	9	Bacteria	Proteobacteria	Deltaproteobacteria	Bdellovibrionales	Bacteriovoracaceae	Bacteriovorax
ASV_493	0	0	2	0	0	0	0	0	0	0	0	0	0	0	0	0	4	2	13	5	13	14	20	0	4	3	7	4	0	Bacteria	Actinobacteria	Actinobacteria	Actinomycetales	Nocardioidaceae	Nocardioides
ASV_494	0	0	0	0	0	0	2	0	0	0	0	0	0	5	15	0	0	3	7	0	0	3	1	8	9	9	2	4	0	Bacteria	Actinobacteria	Actinobacteria	Actinomycetales	Geodermatophilaceae	Blastococcus
ASV_495	0	0	0	0	0	0	0	0	0	89	0	0	0	0	0	0	0	0	0	0	0	0	0	0	0	0	0	0	0	Bacteria	Proteobacteria	Betaproteobacteria	Burkholderiales	Oxalobacteraceae	Noviherbaspirillum
ASV_496	0	0	0	0	0	0	0	0	0	0	0	0	0	0	0	0	12	0	26	0	0	7	10	19	15	0	0	0	0	Bacteria	Actinobacteria	Actinobacteria	Actinomycetales	Thermomonosporaceae	Actinomadura
ASV_497	0	0	0	0	0	0	0	0	0	0	0	0	0	0	0	0	0	3	0	0	9	14	6	3	0	8	14	22	10	Bacteria	Proteobacteria	Alphaproteobacteria	Sphingomonadales	Sphingomonadaceae	unclassified_Sphingomonadaceae
ASV_498	0	0	0	0	0	0	0	0	0	0	0	0	0	0	0	0	0	0	24	18	14	1	23	5	0	0	0	0	4	Bacteria	Actinobacteria	Actinobacteria	Actinomycetales	Nocardiaceae	Nocardia
ASV_499	0	0	0	4	3	10	0	0	0	0	0	0	0	0	0	0	0	0	0	0	3	6	0	0	0	3	19	0	40	Bacteria	Actinobacteria	Actinobacteria	unclassified_Actinobacteria	unclassified_Actinobacteria	unclassified_Actinobacteria
ASV_500	0	0	0	0	2	0	0	0	0	0	0	0	0	0	0	0	0	0	0	1	10	4	0	0	0	15	6	43	7	Bacteria	Proteobacteria	Alphaproteobacteria	Sphingomonadales	Erythrobacteraceae	unclassified_Erythrobacteraceae
ASV_501	0	0	0	0	0	0	0	0	0	0	0	0	0	0	0	0	10	9	12	9	5	5	15	5	8	7	3	0	0	Bacteria	Acidobacteria	Acidobacteria_Gp16	Gp16	Gp16	Gp16
ASV_502	0	0	0	0	0	0	0	0	0	0	0	0	0	0	0	0	1	20	0	0	64	0	0	0	0	2	0	0	1	Bacteria	Bacteroidetes	Sphingobacteriia	Sphingobacteriales	Chitinophagaceae	Chitinophaga
ASV_503	0	0	0	0	0	0	0	0	0	0	0	0	0	0	0	0	0	0	8	5	0	5	19	0	0	0	51	0	0	Bacteria	Actinobacteria	Actinobacteria	Actinomycetales	Streptomycetaceae	Streptomyces
ASV_504	0	0	0	0	0	0	0	0	0	0	0	0	0	0	0	0	3	25	1	12	28	13	5	0	0	0	0	0	0	Bacteria	Candidatus Saccharibacteria	Saccharibacteria_genera_incertae_sedis	Saccharibacteria_genera_incertae_sedis	Saccharibacteria_genera_incertae_sedis	Saccharibacteria_genera_incertae_sedis
ASV_506	0	0	0	0	0	0	0	0	0	0	0	0	0	0	0	0	3	13	0	4	23	5	5	0	0	5	8	13	7	Bacteria	Actinobacteria	Actinobacteria	unclassified_Actinobacteria	unclassified_Actinobacteria	unclassified_Actinobacteria
ASV_507	0	2	0	3	0	4	0	0	0	0	0	12	0	0	0	12	0	0	0	0	5	0	4	6	8	2	0	0	0	Bacteria	Actinobacteria	Actinobacteria	Actinomycetales	Pseudonocardiaceae	Pseudonocardia
ASV_508	0	0	0	0	0	0	0	0	0	0	0	0	0	0	0	0	6	9	5	6	8	0	10	5	4	11	7	11	3	Bacteria	Actinobacteria	Actinobacteria	Acidimicrobiales	unclassified_Acidimicrobiales	unclassified_Acidimicrobiales
ASV_509	0	0	0	0	0	0	0	0	0	0	0	0	0	0	0	0	0	20	0	6	18	3	29	0	0	0	0	0	8	Bacteria	Proteobacteria	Betaproteobacteria	Burkholderiales	Alcaligenaceae	Achromobacter
ASV_510	0	0	0	0	0	0	0	0	0	0	0	0	0	0	0	0	0	0	16	4	22	4	14	13	6	0	0	0	6	Bacteria	Actinobacteria	Actinobacteria	Actinomycetales	Microbacteriaceae	unclassified_Microbacteriaceae
ASV_511	3	7	4	3	15	0	7	0	0	0	0	0	0	0	0	0	0	7	0	0	3	0	3	0	0	10	7	4	9	Bacteria	Actinobacteria	Actinobacteria	Solirubrobacterales	Patulibacteraceae	Patulibacter
ASV_512	0	0	0	0	0	0	0	0	0	0	0	0	0	0	0	0	32	7	0	0	19	8	0	7	0	0	3	0	8	Bacteria	Actinobacteria	Actinobacteria	Actinomycetales	unclassified_Actinomycetales	unclassified_Actinomycetales
ASV_513	0	0	0	0	0	0	0	0	0	0	0	0	0	0	0	0	0	0	0	0	0	0	0	0	0	0	0	0	84	Bacteria	Proteobacteria	Gammaproteobacteria	Pseudomonadales	Moraxellaceae	Enhydrobacter
ASV_514	0	18	12	7	0	8	3	0	0	0	0	0	0	0	0	0	0	0	0	0	0	0	21	0	0	0	14	0	0	Bacteria	Bacteroidetes	Cytophagia	Cytophagales	Cytophagaceae	Dyadobacter
ASV_515	0	0	0	0	83	0	0	0	0	0	0	0	0	0	0	0	0	0	0	0	0	0	0	0	0	0	0	0	0	Bacteria	Proteobacteria	Gammaproteobacteria	Pseudomonadales	Pseudomonadaceae	Pseudomonas
ASV_516	0	0	0	0	0	0	1	0	0	0	0	0	0	0	0	0	13	5	0	6	5	6	2	6	0	8	4	17	10	Bacteria	Firmicutes	Bacilli	Bacillales	Paenibacillaceae 1	Paenibacillus
ASV_517	0	0	0	0	0	0	0	8	0	5	2	13	2	0	7	0	0	0	0	0	0	0	0	0	0	0	0	0	0	Bacteria	unclassified_Bacteria	unclassified_Bacteria	unclassified_Bacteria	unclassified_Bacteria	unclassified_Bacteria
ASV_518	0	0	0	0	0	0	0	19	3	14	0	0	0	0	0	40	0	0	0	0	0	0	0	0	0	0	0	0	0	Bacteria	Actinobacteria	Actinobacteria	Actinomycetales	unclassified_Actinomycetales	unclassified_Actinomycetales
ASV_519	0	0	0	0	0	0	0	0	0	0	0	0	0	0	0	0	0	0	0	4	10	5	9	0	0	4	12	34	4	Bacteria	Proteobacteria	Alphaproteobacteria	Sphingomonadales	Sphingomonadaceae	Sphingomonas
ASV_520	12	10	4	5	5	1	3	4	0	0	2	1	0	0	1	2	2	8	0	1	0	0	0	1	3	0	4	2	1	Bacteria	Actinobacteria	Actinobacteria	Actinomycetales	Microbacteriaceae	unclassified_Microbacteriaceae
ASV_521	0	0	81	0	0	0	0	0	0	0	0	0	0	0	0	0	0	0	0	0	0	0	0	0	0	0	0	0	0	Bacteria	Bacteroidetes	Sphingobacteriia	Sphingobacteriales	Sphingobacteriaceae	Pedobacter
ASV_522	0	0	0	0	0	0	0	0	0	0	0	0	0	0	0	0	0	3	0	72	0	0	0	0	0	0	0	0	0	Bacteria	Bacteroidetes	Cytophagia	Cytophagales	Cytophagaceae	Dyadobacter
ASV_523	16	0	3	0	0	0	0	0	0	0	0	0	0	0	0	0	0	0	0	47	10	0	0	0	0	4	0	0	0	Bacteria	Bacteroidetes	Sphingobacteriia	Sphingobacteriales	Sphingobacteriaceae	Pedobacter
ASV_524	0	40	19	7	3	0	0	0	0	0	0	0	0	0	9	0	0	0	0	0	0	0	0	0	0	0	1	1	0	Bacteria	Proteobacteria	Betaproteobacteria	Burkholderiales	Oxalobacteraceae	unclassified_Oxalobacteraceae
ASV_525	0	0	0	0	0	0	0	0	0	0	0	0	0	0	0	0	0	15	8	13	9	6	7	0	12	4	0	6	0	Bacteria	Acidobacteria	Acidobacteria_Gp16	Gp16	Gp16	Gp16
ASV_526	0	0	0	0	0	0	0	0	0	0	0	0	0	0	0	0	0	11	0	10	6	4	49	0	0	0	0	0	0	Bacteria	Proteobacteria	Betaproteobacteria	Burkholderiales	Alcaligenaceae	Achromobacter
ASV_527	0	13	8	5	6	7	5	0	0	0	0	0	0	0	19	0	0	0	0	0	0	0	0	2	0	0	7	3	4	Bacteria	Actinobacteria	Actinobacteria	Actinomycetales	Thermomonosporaceae	Actinoallomurus
ASV_528	0	0	0	0	1	1	0	0	0	0	0	0	0	0	0	0	5	3	12	3	8	3	10	16	9	3	0	2	3	Bacteria	Acidobacteria	Acidobacteria_Gp16	Gp16	Gp16	Gp16
ASV_530	0	0	0	0	0	0	0	0	0	0	0	0	0	14	18	0	3	0	2	0	2	0	14	7	8	6	2	0	0	Bacteria	Actinobacteria	Actinobacteria	Actinomycetales	Pseudonocardiaceae	Pseudonocardia
ASV_531	0	0	0	0	0	0	0	0	0	0	0	0	0	0	0	0	0	4	0	2	9	3	8	0	2	18	4	17	12	Bacteria	Proteobacteria	Alphaproteobacteria	Rhizobiales	Rhizobiales_incertae_sedis	Alsobacter
ASV_532	0	5	0	0	0	0	0	0	0	0	0	0	0	0	0	0	3	0	8	1	5	0	14	7	7	3	11	6	8	Bacteria	Actinobacteria	Actinobacteria	Actinomycetales	Nocardioidaceae	unclassified_Nocardioidaceae
ASV_533	0	0	0	0	0	0	0	0	0	0	0	0	0	8	0	17	0	0	0	0	3	3	0	6	0	16	6	7	0	Bacteria	Actinobacteria	Actinobacteria	Actinomycetales	Nocardioidaceae	unclassified_Nocardioidaceae
ASV_534	2	6	0	13	0	0	0	6	0	0	0	0	0	0	0	10	3	0	0	0	0	3	0	1	6	10	6	3	0	Bacteria	Actinobacteria	Actinobacteria	Actinomycetales	Propionibacteriaceae	unclassified_Propionibacteriaceae
ASV_536	11	9	5	1	5	13	0	0	0	0	0	0	0	0	0	0	0	0	0	0	0	0	0	0	0	1	20	5	0	Bacteria	Bacteroidetes	Flavobacteriia	Flavobacteriales	Flavobacteriaceae	Flavobacterium
ASV_537	0	15	9	3	0	6	3	0	0	0	0	0	0	0	0	0	0	0	0	0	0	0	0	0	0	0	21	9	4	Bacteria	Bacteroidetes	Cytophagia	Cytophagales	Cytophagaceae	Dyadobacter
ASV_539	0	0	0	0	0	0	0	0	0	0	0	0	0	0	0	0	5	6	5	3	5	6	11	3	0	7	11	14	0	Bacteria	Actinobacteria	Actinobacteria	Acidimicrobiales	Iamiaceae	Aquihabitans
ASV_540	0	0	0	0	0	0	0	0	0	0	0	0	0	0	0	0	0	0	0	76	0	0	0	0	0	0	0	0	0	Bacteria	Bacteroidetes	Sphingobacteriia	Sphingobacteriales	Sphingobacteriaceae	Sphingobacterium
ASV_541	0	0	0	0	0	1	0	2	0	0	0	0	0	0	0	0	0	0	0	0	4	0	0	0	4	14	38	6	6	Bacteria	Proteobacteria	Alphaproteobacteria	Caulobacterales	Caulobacteraceae	Brevundimonas
ASV_545	0	0	0	0	0	0	0	0	0	6	6	0	0	5	0	0	9	3	4	6	6	0	12	0	2	1	6	4	5	Bacteria	Actinobacteria	Actinobacteria	Gaiellales	Gaiellaceae	Gaiella
ASV_546	0	0	0	0	0	0	0	0	0	0	0	0	0	0	0	0	49	9	0	4	7	0	0	0	6	0	0	0	0	Bacteria	Actinobacteria	Actinobacteria	Actinomycetales	Micromonosporaceae	unclassified_Micromonosporaceae
ASV_547	0	0	0	0	0	0	0	0	0	0	0	0	0	0	0	0	8	0	0	0	16	7	11	0	0	9	6	18	0	Bacteria	Proteobacteria	Betaproteobacteria	Burkholderiales	Oxalobacteraceae	unclassified_Oxalobacteraceae
ASV_548	0	0	0	0	0	0	0	0	0	0	0	0	0	0	0	0	1	1	0	5	20	4	1	0	0	13	13	15	1	Bacteria	Proteobacteria	Gammaproteobacteria	Xanthomonadales	Xanthomonadaceae	Arenimonas
ASV_549	0	0	0	0	0	0	0	0	0	0	0	0	0	0	0	0	0	0	0	0	0	0	0	0	0	22	0	52	1	Bacteria	Proteobacteria	Betaproteobacteria	Burkholderiales	Oxalobacteraceae	unclassified_Oxalobacteraceae
ASV_550	0	3	0	0	2	0	0	0	0	0	0	14	0	0	0	0	2	0	0	0	0	0	1	8	5	11	4	7	3	Bacteria	Actinobacteria	Actinobacteria	Actinomycetales	Microbacteriaceae	Amnibacterium
ASV_551	0	0	0	0	0	0	0	0	0	0	0	0	0	0	0	0	5	0	0	11	11	6	4	0	3	7	7	11	9	Bacteria	Proteobacteria	Betaproteobacteria	Burkholderiales	unclassified_Burkholderiales	unclassified_Burkholderiales
ASV_552	0	0	0	0	0	0	0	0	0	0	0	0	0	0	0	0	5	21	4	20	16	2	1	0	0	0	0	0	5	Bacteria	Proteobacteria	Betaproteobacteria	Burkholderiales	unclassified_Burkholderiales	unclassified_Burkholderiales
ASV_553	0	0	0	0	0	0	0	0	0	0	0	0	0	0	0	0	3	0	0	11	0	0	2	0	0	21	9	11	17	Bacteria	Proteobacteria	Betaproteobacteria	Burkholderiales	Oxalobacteraceae	unclassified_Oxalobacteraceae
ASV_554	1	0	0	0	0	0	0	0	0	0	0	0	0	0	0	31	2	0	0	0	0	0	0	0	0	1	0	0	0	Bacteria	Actinobacteria	Actinobacteria	Actinomycetales	unclassified_Actinomycetales	unclassified_Actinomycetales
ASV_555	0	0	0	0	0	0	0	0	0	0	14	0	0	0	0	0	8	7	1	8	8	4	0	0	0	6	0	8	8	Bacteria	Chloroflexi	unclassified_Chloroflexi	unclassified_Chloroflexi	unclassified_Chloroflexi	unclassified_Chloroflexi
ASV_556	0	0	0	0	0	0	0	0	0	0	6	0	0	0	0	0	0	0	0	0	2	6	6	0	0	11	18	16	8	Bacteria	Proteobacteria	Betaproteobacteria	Burkholderiales	Comamonadaceae	unclassified_Comamonadaceae
ASV_557	0	0	0	0	0	0	0	0	0	0	0	0	0	0	0	0	0	47	0	11	4	0	8	0	0	0	0	0	0	Bacteria	Bacteroidetes	Flavobacteriia	Flavobacteriales	Flavobacteriaceae	Chryseobacterium
ASV_558	0	1	0	0	0	0	0	0	0	0	0	0	0	0	0	0	5	0	1	0	3	7	2	0	0	16	8	13	7	Bacteria	Proteobacteria	Alphaproteobacteria	Rhizobiales	Bradyrhizobiaceae	Rhodopseudomonas
ASV_561	0	0	0	0	0	0	0	0	0	7	0	0	0	0	0	0	0	7	0	3	4	9	3	0	0	9	4	18	8	Bacteria	Proteobacteria	Gammaproteobacteria	Xanthomonadales	Xanthomonadaceae	unclassified_Xanthomonadaceae
ASV_562	0	0	0	0	0	0	0	0	0	0	0	0	0	0	0	0	11	6	0	16	7	18	4	0	0	0	10	0	0	Bacteria	Bacteroidetes	Sphingobacteriia	Sphingobacteriales	Sphingobacteriaceae	Pedobacter
ASV_563	0	12	0	0	8	0	0	0	0	0	0	0	0	0	0	0	0	0	0	2	0	3	0	0	0	0	45	0	1	Bacteria	Bacteroidetes	Flavobacteriia	Flavobacteriales	Flavobacteriaceae	Chryseobacterium
ASV_564	0	0	0	0	0	0	71	0	0	0	0	0	0	0	0	0	0	0	0	0	0	0	0	0	0	0	0	0	0	Bacteria	Proteobacteria	Betaproteobacteria	Burkholderiales	Oxalobacteraceae	Duganella
ASV_566	0	0	0	0	0	0	0	6	0	0	0	0	0	0	0	0	0	3	0	0	0	14	18	0	0	7	0	2	21	Bacteria	Proteobacteria	Alphaproteobacteria	Rhizobiales	Methylobacteriaceae	Microvirga
ASV_567	0	0	0	0	0	0	0	0	0	0	0	0	0	0	0	0	6	9	0	5	23	0	3	0	0	11	7	6	1	Bacteria	Verrucomicrobia	Verrucomicrobiae	Verrucomicrobiales	Verrucomicrobiaceae	Luteolibacter
ASV_568	0	0	0	0	0	0	0	0	0	0	0	0	0	0	0	0	0	0	0	0	0	0	0	0	0	6	65	0	0	Bacteria	Candidatus Saccharibacteria	Saccharibacteria_genera_incertae_sedis	Saccharibacteria_genera_incertae_sedis	Saccharibacteria_genera_incertae_sedis	Saccharibacteria_genera_incertae_sedis
ASV_569	0	0	0	0	0	0	0	0	0	0	0	0	0	0	0	0	0	0	0	0	0	0	0	0	0	0	71	0	0	Bacteria	Bacteroidetes	Sphingobacteriia	Sphingobacteriales	Sphingobacteriaceae	Pedobacter
ASV_570	16	3	2	0	0	12	0	0	0	0	0	0	0	0	0	0	0	0	0	0	4	0	0	0	0	2	8	3	20	Bacteria	Bacteroidetes	Flavobacteriia	Flavobacteriales	Flavobacteriaceae	Flavobacterium
ASV_571	0	0	9	1	2	0	0	0	0	0	0	0	0	0	24	0	0	0	0	4	2	2	5	2	0	14	0	5	0	Bacteria	Actinobacteria	Actinobacteria	Solirubrobacterales	unclassified_Solirubrobacterales	unclassified_Solirubrobacterales
ASV_572	0	0	0	6	0	0	0	0	0	0	0	0	0	0	0	0	0	2	0	0	1	0	0	0	21	18	3	19	0	Bacteria	Actinobacteria	Actinobacteria	Actinomycetales	Micromonosporaceae	Actinoplanes
ASV_573	0	0	0	0	0	0	0	0	0	10	0	0	2	7	0	0	0	0	0	0	0	0	0	0	0	0	0	0	0	Bacteria	Firmicutes	Bacilli	Bacillales	Staphylococcaceae	Staphylococcus
ASV_575	0	0	0	0	0	0	0	0	0	0	0	0	0	0	0	0	0	0	0	0	0	0	0	0	0	0	0	70	0	Bacteria	Bacteroidetes	Flavobacteriia	Flavobacteriales	Flavobacteriaceae	Flavobacterium
ASV_576	0	0	3	0	0	3	0	0	0	0	0	15	0	0	41	0	0	0	0	3	0	0	2	0	0	2	0	0	0	Bacteria	Actinobacteria	Actinobacteria	Actinomycetales	unclassified_Actinomycetales	unclassified_Actinomycetales
ASV_577	0	0	0	0	0	0	0	0	0	0	0	0	0	0	0	0	0	0	0	0	69	0	0	0	0	0	0	0	0	Bacteria	Proteobacteria	Betaproteobacteria	Burkholderiales	unclassified_Burkholderiales	unclassified_Burkholderiales
ASV_578	3	0	0	0	0	0	0	0	0	0	0	0	0	0	0	0	4	7	0	4	0	0	0	0	0	34	3	13	0	Bacteria	Proteobacteria	Alphaproteobacteria	Rhizobiales	Bradyrhizobiaceae	Rhodopseudomonas
ASV_579	1	3	0	0	0	0	0	0	0	0	0	0	0	0	0	0	0	0	4	32	7	0	0	0	0	2	12	7	0	Bacteria	Bacteroidetes	Flavobacteriia	Flavobacteriales	Flavobacteriaceae	Flavobacterium
ASV_580	1	13	0	5	1	6	5	0	0	0	0	0	0	0	0	0	0	0	0	0	0	0	0	0	0	3	0	8	0	Bacteria	Proteobacteria	Alphaproteobacteria	Sphingomonadales	Sphingomonadaceae	Sphingomonas
ASV_581	0	9	0	3	0	14	41	0	0	0	0	0	0	0	0	0	0	0	0	0	0	0	0	0	0	0	0	0	0	Bacteria	Proteobacteria	Betaproteobacteria	Burkholderiales	Oxalobacteraceae	Duganella
ASV_582	0	4	6	0	0	4	0	0	0	0	0	0	0	0	0	0	8	6	0	8	2	2	6	0	0	11	4	0	6	Bacteria	unclassified_Bacteria	unclassified_Bacteria	unclassified_Bacteria	unclassified_Bacteria	unclassified_Bacteria
ASV_583	0	1	0	0	0	0	0	0	0	0	0	0	0	0	0	0	8	3	0	5	5	0	7	4	10	7	4	8	5	Bacteria	unclassified_Bacteria	unclassified_Bacteria	unclassified_Bacteria	unclassified_Bacteria	unclassified_Bacteria
ASV_584	0	0	1	0	0	0	0	0	0	0	0	0	0	0	0	0	0	0	0	1	2	0	2	0	0	44	0	6	11	Bacteria	Proteobacteria	Betaproteobacteria	Burkholderiales	Oxalobacteraceae	Massilia
ASV_585	0	0	0	0	0	0	0	0	0	0	0	0	0	0	0	0	10	2	2	0	0	0	0	22	31	0	0	0	0	Bacteria	Actinobacteria	Actinobacteria	Actinomycetales	Pseudonocardiaceae	Amycolatopsis
ASV_586	0	0	0	0	0	0	0	0	0	0	0	0	0	0	0	0	10	0	0	8	10	6	8	0	0	7	5	13	0	Bacteria	Actinobacteria	Actinobacteria	Actinomycetales	Nocardioidaceae	Nocardioides
ASV_587	0	0	0	0	0	0	0	0	0	0	0	0	0	0	0	0	0	0	0	0	0	0	0	1	0	9	23	3	31	Bacteria	Proteobacteria	Alphaproteobacteria	Sphingomonadales	Sphingomonadaceae	Sphingomonas
ASV_588	2	12	5	5	8	0	1	14	0	0	0	0	3	0	0	0	0	0	2	2	0	3	5	0	0	4	0	0	0	Bacteria	Proteobacteria	Alphaproteobacteria	Rhodospirillales	Acetobacteraceae	unclassified_Acetobacteraceae
ASV_589	0	3	0	0	0	3	0	0	0	0	0	0	0	0	50	0	0	0	4	0	0	0	0	0	2	0	3	0	0	Bacteria	Actinobacteria	Actinobacteria	unclassified_Actinobacteria	unclassified_Actinobacteria	unclassified_Actinobacteria
ASV_590	0	0	1	0	0	0	0	0	0	0	0	0	0	0	0	0	0	3	28	3	0	4	14	5	6	0	0	0	0	Bacteria	Actinobacteria	Actinobacteria	unclassified_Actinobacteria	unclassified_Actinobacteria	unclassified_Actinobacteria
ASV_592	0	0	0	0	0	0	0	0	0	0	0	0	0	4	0	0	0	0	0	9	20	8	0	0	0	13	0	11	0	Bacteria	Actinobacteria	unclassified_Actinobacteria	unclassified_Actinobacteria	unclassified_Actinobacteria	unclassified_Actinobacteria
ASV_593	0	0	0	0	0	0	0	0	0	0	0	0	0	0	0	0	40	12	0	5	6	0	2	0	0	0	0	0	0	Bacteria	Proteobacteria	Betaproteobacteria	unclassified_Betaproteobacteria	unclassified_Betaproteobacteria	unclassified_Betaproteobacteria
ASV_594	0	0	0	0	0	0	0	0	0	0	0	0	0	0	0	0	7	0	5	0	4	7	10	10	5	15	0	2	0	Bacteria	Actinobacteria	Actinobacteria	Actinomycetales	Nocardiaceae	Williamsia
ASV_595	0	0	0	0	0	0	0	0	0	0	0	0	0	0	0	0	2	0	7	8	0	0	3	13	25	2	0	5	0	Bacteria	Actinobacteria	Actinobacteria	Actinomycetales	Pseudonocardiaceae	Amycolatopsis
ASV_596	0	0	0	0	0	0	0	0	0	0	0	0	0	0	0	0	0	0	0	0	0	0	0	0	65	0	0	0	0	Bacteria	Actinobacteria	Actinobacteria	Actinomycetales	Intrasporangiaceae	Phycicoccus
ASV_597	0	25	0	1	0	1	1	0	0	0	0	0	0	0	0	0	0	0	0	0	0	0	0	0	0	1	9	1	25	Bacteria	Bacteroidetes	Flavobacteriia	Flavobacteriales	Flavobacteriaceae	Flavobacterium
ASV_598	0	11	0	3	8	13	0	0	0	0	0	10	0	0	0	0	0	0	0	0	0	0	6	3	1	0	1	0	0	Bacteria	Actinobacteria	Actinobacteria	Actinomycetales	Micromonosporaceae	Micromonospora
ASV_601	0	0	0	0	0	0	0	0	0	0	0	0	0	0	0	0	0	0	0	0	58	6	0	0	0	0	0	0	0	Bacteria	Bacteroidetes	Flavobacteriia	Flavobacteriales	Flavobacteriaceae	Chryseobacterium
ASV_602	0	0	0	0	0	0	0	0	0	0	0	0	0	0	0	0	1	0	0	0	3	0	1	0	0	10	6	30	11	Bacteria	Proteobacteria	Alphaproteobacteria	Sphingomonadales	Sphingomonadaceae	Sphingomonas
ASV_603	0	9	0	10	3	0	0	0	0	0	0	0	0	0	34	0	0	0	0	0	0	0	0	0	0	0	0	5	0	Bacteria	Bacteroidetes	Cytophagia	Cytophagales	Cytophagaceae	Hymenobacter
ASV_604	0	0	3	3	0	0	3	0	0	0	0	9	0	0	0	0	9	0	0	0	2	0	3	4	4	7	4	3	7	Bacteria	Actinobacteria	Actinobacteria	Solirubrobacterales	Conexibacteraceae	Conexibacter
ASV_606	0	0	0	0	0	0	0	0	0	0	0	0	0	0	0	0	3	4	5	0	0	0	9	2	0	5	11	16	8	Bacteria	Actinobacteria	Actinobacteria	Acidimicrobiales	unclassified_Acidimicrobiales	unclassified_Acidimicrobiales
ASV_607	0	5	2	0	3	0	0	0	0	0	0	0	0	0	0	16	0	0	0	0	0	0	0	6	1	5	2	3	0	Bacteria	Actinobacteria	Actinobacteria	Actinomycetales	Geodermatophilaceae	Geodermatophilus
ASV_608	0	2	0	1	0	3	0	0	0	0	0	14	0	0	0	0	5	7	0	0	0	1	0	0	0	6	3	4	4	Bacteria	Firmicutes	Bacilli	Bacillales	Bacillaceae 1	Bacillus
ASV_609	0	0	0	0	3	0	0	16	0	0	0	0	0	0	0	0	1	0	0	0	0	0	8	0	6	2	3	8	0	Bacteria	Actinobacteria	Actinobacteria	Actinomycetales	Cryptosporangiaceae	Jatrophihabitans
ASV_611	0	5	4	9	2	0	4	6	0	0	0	0	0	0	0	0	0	10	0	0	0	1	0	0	0	1	14	0	4	Bacteria	Proteobacteria	Betaproteobacteria	Burkholderiales	Alcaligenaceae	Pigmentiphaga
ASV_612	0	0	9	0	0	0	0	0	0	0	0	0	0	0	0	30	0	0	0	0	0	0	0	11	0	0	0	0	0	Bacteria	Actinobacteria	Actinobacteria	Actinomycetales	Geodermatophilaceae	Modestobacter
ASV_614	6	5	0	1	0	0	0	0	0	0	4	0	0	0	0	0	0	0	0	0	0	0	0	0	0	0	13	31	0	Bacteria	Proteobacteria	Betaproteobacteria	Burkholderiales	Oxalobacteraceae	unclassified_Oxalobacteraceae
ASV_615	2	0	0	3	0	0	0	0	0	0	0	0	0	0	0	0	13	0	0	0	4	0	0	0	0	4	14	10	10	Bacteria	Bacteroidetes	Sphingobacteriia	Sphingobacteriales	Sphingobacteriaceae	Pedobacter
ASV_616	0	2	1	0	0	0	0	0	0	0	0	0	0	0	22	0	0	4	0	3	3	10	7	0	0	2	0	6	0	Bacteria	Actinobacteria	Actinobacteria	unclassified_Actinobacteria	unclassified_Actinobacteria	unclassified_Actinobacteria
ASV_617	0	0	0	0	0	0	0	3	0	0	5	0	0	0	0	0	3	12	2	0	0	2	5	0	1	14	3	5	0	Bacteria	Proteobacteria	Alphaproteobacteria	Rhizobiales	Methylobacteriaceae	Methylobacterium
ASV_618	0	0	0	0	0	0	0	0	0	0	0	0	0	0	0	0	5	10	0	6	6	8	10	0	2	1	0	7	5	Bacteria	unclassified_Bacteria	unclassified_Bacteria	unclassified_Bacteria	unclassified_Bacteria	unclassified_Bacteria
ASV_619	0	0	0	0	0	0	0	0	0	0	0	0	0	0	0	0	2	0	0	1	5	6	1	0	0	1	10	25	9	Bacteria	Proteobacteria	Alphaproteobacteria	Sphingomonadales	Sphingomonadaceae	Sphingomonas
ASV_620	2	5	0	0	0	10	2	0	0	0	0	0	0	7	0	0	3	0	4	0	0	0	9	0	0	0	0	13	4	Bacteria	Actinobacteria	Actinobacteria	Actinomycetales	Pseudonocardiaceae	Pseudonocardia
ASV_621	0	2	0	0	0	0	0	0	0	6	6	0	0	0	0	0	0	1	0	10	2	6	0	0	3	0	2	9	2	Bacteria	Acidobacteria	Acidobacteria_Gp1	Gp1	Gp1	Gp1
ASV_623	0	0	0	0	0	0	0	0	0	0	0	0	0	0	0	0	59	0	0	0	0	0	0	0	0	0	0	0	0	Bacteria	Firmicutes	Bacilli	Bacillales	Paenibacillaceae 1	unclassified_Paenibacillaceae 1
ASV_624	0	0	0	0	0	0	0	0	0	0	0	0	0	0	0	0	6	5	8	6	14	5	5	0	5	0	0	5	0	Bacteria	Actinobacteria	Actinobacteria	unclassified_Actinobacteria	unclassified_Actinobacteria	unclassified_Actinobacteria
ASV_625	0	0	0	0	0	0	0	0	0	0	0	0	0	0	0	0	0	0	0	0	0	0	0	0	0	0	0	0	59	Bacteria	Proteobacteria	Alphaproteobacteria	Rhizobiales	Rhizobiaceae	Rhizobium
ASV_626	3	4	0	0	2	0	0	0	0	9	0	0	0	0	0	0	0	3	0	0	11	0	0	0	0	4	4	13	5	Bacteria	Proteobacteria	Alphaproteobacteria	Rhizobiales	Beijerinckiaceae	Beijerinckia
ASV_627	0	0	0	0	0	0	0	0	0	0	0	0	0	0	0	0	5	6	12	0	5	3	7	0	5	6	0	0	9	Bacteria	Actinobacteria	Actinobacteria	Actinomycetales	Microbacteriaceae	Agromyces
ASV_628	0	0	0	0	0	0	0	0	0	0	0	0	0	0	0	0	3	3	0	7	8	4	6	0	6	7	0	12	2	Bacteria	Actinobacteria	Actinobacteria	Actinomycetales	Nocardioidaceae	Nocardioides
ASV_629	0	0	0	0	0	0	0	0	0	0	0	0	0	0	0	0	0	0	0	0	4	8	0	0	0	13	9	22	2	Bacteria	Proteobacteria	Gammaproteobacteria	Xanthomonadales	Xanthomonadaceae	unclassified_Xanthomonadaceae
ASV_630	0	27	0	3	0	0	0	0	0	0	0	0	0	7	19	0	0	0	0	0	0	1	0	0	0	0	0	0	0	Bacteria	Bacteroidetes	Sphingobacteriia	Sphingobacteriales	Sphingobacteriaceae	Pedobacter
ASV_631	0	0	0	0	0	0	0	0	0	0	0	0	0	0	0	0	0	0	0	0	0	0	0	0	10	7	4	30	6	Bacteria	Actinobacteria	Actinobacteria	Actinomycetales	unclassified_Actinomycetales	unclassified_Actinomycetales
ASV_632	5	0	1	0	0	0	0	0	0	0	3	0	0	0	15	0	3	0	5	0	5	0	6	3	3	0	2	5	0	Bacteria	Actinobacteria	Actinobacteria	Actinomycetales	Kineosporiaceae	Angustibacter
ASV_633	0	0	0	0	0	3	1	0	0	0	0	9	0	8	0	0	4	4	1	0	0	0	3	0	6	0	0	14	0	Bacteria	Proteobacteria	Alphaproteobacteria	Rhizobiales	unclassified_Rhizobiales	unclassified_Rhizobiales
ASV_635	0	0	0	0	0	0	0	0	0	0	0	0	0	0	0	0	0	0	0	0	0	0	0	0	0	0	0	56	0	Bacteria	Actinobacteria	Actinobacteria	Actinomycetales	unclassified_Actinomycetales	unclassified_Actinomycetales
ASV_636	55	0	0	0	0	0	0	0	0	0	0	0	0	0	0	0	0	0	0	0	0	0	0	0	0	0	0	0	0	Bacteria	Proteobacteria	Betaproteobacteria	Burkholderiales	Oxalobacteraceae	Massilia
ASV_637	0	0	55	0	0	0	0	0	0	0	0	0	0	0	0	0	0	0	0	0	0	0	0	0	0	0	0	0	0	Bacteria	Actinobacteria	Actinobacteria	Actinomycetales	Micrococcaceae	Arthrobacter
ASV_638	0	0	0	0	0	22	0	0	0	0	0	0	0	0	0	0	0	0	0	25	8	0	0	0	0	0	0	0	0	Bacteria	Bacteroidetes	Sphingobacteriia	Sphingobacteriales	Sphingobacteriaceae	Pedobacter
ASV_639	0	0	0	0	0	0	0	0	0	0	0	0	0	0	0	48	0	0	0	0	0	0	0	0	0	0	0	0	0	Bacteria	Actinobacteria	Actinobacteria	Actinomycetales	Dermacoccaceae	Dermacoccus
ASV_641	0	0	0	0	0	0	0	0	0	0	0	0	0	0	37	0	11	0	0	1	0	5	0	0	0	0	0	1	0	Bacteria	Actinobacteria	Actinobacteria	Actinomycetales	Corynebacteriaceae	Corynebacterium
ASV_642	0	0	0	0	0	0	0	0	0	0	0	0	0	0	16	0	0	3	0	0	5	0	0	0	13	8	0	10	0	Bacteria	Actinobacteria	Actinobacteria	Solirubrobacterales	Solirubrobacteraceae	Solirubrobacter
ASV_643	0	19	3	14	6	7	0	0	0	0	0	0	0	0	0	5	0	0	0	0	0	0	0	0	0	0	0	0	0	Bacteria	Bacteroidetes	Cytophagia	Cytophagales	Cytophagaceae	Hymenobacter
ASV_644	0	5	0	10	10	3	8	0	0	0	0	0	0	0	0	0	0	0	0	0	0	0	0	10	8	0	0	0	0	Bacteria	Actinobacteria	Actinobacteria	Actinomycetales	Micromonosporaceae	Micromonospora
ASV_645	0	0	0	0	0	0	0	0	0	0	0	0	0	16	0	0	2	1	0	0	26	3	2	0	3	0	1	0	0	Bacteria	Proteobacteria	Alphaproteobacteria	Rhizobiales	Rhizobiaceae	Rhizobium
ASV_646	1	7	5	13	0	25	0	0	0	0	0	0	0	0	0	0	0	0	0	0	0	0	0	0	0	2	0	0	0	Bacteria	Bacteroidetes	Sphingobacteriia	Sphingobacteriales	Sphingobacteriaceae	Pedobacter
ASV_647	0	1	0	0	0	0	0	0	0	0	0	0	0	0	0	0	5	0	8	2	0	0	8	5	2	3	5	3	11	Bacteria	Actinobacteria	Actinobacteria	Actinomycetales	Microbacteriaceae	Agromyces
ASV_649	0	0	0	0	0	0	0	0	0	0	0	0	0	0	0	0	53	0	0	0	0	0	0	0	0	0	0	0	0	Bacteria	Proteobacteria	Alphaproteobacteria	Rhizobiales	Brucellaceae	Ochrobactrum
ASV_650	0	0	0	0	0	0	0	0	0	0	0	0	0	0	0	0	9	0	0	25	12	0	0	0	0	0	0	7	0	Bacteria	unclassified_Bacteria	unclassified_Bacteria	unclassified_Bacteria	unclassified_Bacteria	unclassified_Bacteria
ASV_651	0	0	0	0	0	0	0	0	0	0	0	0	0	0	0	0	5	0	10	0	9	0	16	0	5	0	8	0	0	Bacteria	Proteobacteria	Alphaproteobacteria	Rhizobiales	unclassified_Rhizobiales	unclassified_Rhizobiales
ASV_652	0	0	0	0	0	0	0	0	0	0	0	0	0	0	0	0	0	2	2	0	2	10	24	1	0	0	1	6	5	Bacteria	Proteobacteria	Gammaproteobacteria	Xanthomonadales	Xanthomonadaceae	Pseudoxanthomonas
ASV_653	0	5	0	0	0	0	0	0	0	0	0	0	0	0	0	0	0	0	0	0	0	0	0	0	0	0	30	0	17	Bacteria	Bacteroidetes	Sphingobacteriia	Sphingobacteriales	Sphingobacteriaceae	Sphingobacterium
ASV_654	0	5	0	0	0	0	0	0	0	0	0	0	0	0	34	0	1	0	1	0	0	0	4	0	0	0	0	0	2	Bacteria	Firmicutes	Bacilli	Bacillales	Planococcaceae	Sporosarcina
ASV_655	0	5	0	6	3	0	4	0	0	0	0	0	0	0	0	0	0	0	0	0	0	0	0	4	4	9	0	0	0	Bacteria	Actinobacteria	Actinobacteria	Actinomycetales	Nakamurellaceae	Nakamurella
ASV_656	0	0	3	0	0	0	0	0	0	0	22	0	0	8	6	0	0	3	0	0	3	3	2	0	0	0	0	2	0	Bacteria	Proteobacteria	Alphaproteobacteria	Rhodospirillales	Rhodospirillaceae	Skermanella
ASV_657	0	0	0	0	0	0	0	0	0	0	0	0	0	0	0	0	6	8	7	10	17	0	4	0	0	0	0	0	0	Bacteria	Actinobacteria	Actinobacteria	Acidimicrobiales	unclassified_Acidimicrobiales	unclassified_Acidimicrobiales
ASV_658	0	0	0	0	0	0	0	0	0	0	0	0	0	0	0	0	3	0	0	7	1	6	7	0	4	0	10	8	6	Bacteria	Proteobacteria	Betaproteobacteria	unclassified_Betaproteobacteria	unclassified_Betaproteobacteria	unclassified_Betaproteobacteria
ASV_659	0	0	0	0	0	0	0	0	0	0	0	0	0	0	0	0	0	3	2	0	6	0	0	2	13	5	6	13	2	Bacteria	Actinobacteria	Actinobacteria	Actinomycetales	Nocardioidaceae	Nocardioides
ASV_660	0	0	0	0	0	0	0	0	0	0	0	0	0	0	0	0	0	0	0	6	10	2	5	0	5	5	2	12	5	Bacteria	Proteobacteria	Alphaproteobacteria	Rhizobiales	Rhizobiales_incertae_sedis	Alsobacter
ASV_661	0	5	0	1	0	0	0	0	0	0	0	0	0	0	0	0	0	0	3	3	0	0	3	0	1	0	18	0	10	Bacteria	Proteobacteria	Betaproteobacteria	Burkholderiales	Oxalobacteraceae	unclassified_Oxalobacteraceae
ASV_663	0	0	0	0	0	0	0	0	0	0	0	0	0	0	0	0	14	4	5	0	3	6	0	0	1	0	0	12	6	Bacteria	Actinobacteria	Actinobacteria	Solirubrobacterales	unclassified_Solirubrobacterales	unclassified_Solirubrobacterales
ASV_664	0	0	0	0	0	0	0	0	0	0	0	0	0	0	0	0	0	0	0	0	1	0	0	0	0	11	9	12	18	Bacteria	Candidatus Saccharibacteria	Saccharibacteria_genera_incertae_sedis	Saccharibacteria_genera_incertae_sedis	Saccharibacteria_genera_incertae_sedis	Saccharibacteria_genera_incertae_sedis
ASV_665	4	12	1	0	0	4	8	0	0	0	0	0	0	0	0	0	0	0	0	0	0	0	0	0	0	1	1	0	5	Bacteria	Proteobacteria	Betaproteobacteria	Burkholderiales	Comamonadaceae	unclassified_Comamonadaceae
ASV_666	0	0	3	0	4	4	4	0	0	0	5	0	0	0	0	0	0	1	6	1	3	0	0	1	3	0	0	5	0	Bacteria	Actinobacteria	Actinobacteria	Actinomycetales	Kineosporiaceae	Angustibacter
ASV_668	0	0	0	0	0	0	0	0	0	0	0	4	0	0	0	0	0	0	11	5	4	11	15	0	0	0	0	0	0	Bacteria	Actinobacteria	Actinobacteria	Actinomycetales	Nocardioidaceae	Nocardioides
ASV_669	0	0	0	0	0	0	0	0	0	0	0	0	0	9	0	0	1	0	11	0	0	5	5	0	13	6	0	0	0	Bacteria	Actinobacteria	Actinobacteria	Actinomycetales	Pseudonocardiaceae	Pseudonocardia
ASV_670	0	0	0	0	0	0	0	0	0	0	0	0	0	0	0	0	6	0	0	10	31	0	0	0	0	0	0	3	0	Bacteria	Proteobacteria	Gammaproteobacteria	Enterobacteriales	Enterobacteriaceae	Serratia
ASV_671	0	0	0	0	0	0	0	0	0	0	0	0	0	0	0	0	0	0	0	0	0	0	0	0	0	0	50	0	0	Bacteria	Proteobacteria	Betaproteobacteria	Burkholderiales	Oxalobacteraceae	unclassified_Oxalobacteraceae
ASV_672	3	0	0	0	0	0	0	0	0	0	0	0	0	0	18	0	10	0	3	6	2	0	0	0	0	5	0	0	2	Bacteria	Firmicutes	Bacilli	Bacillales	Thermoactinomycetaceae 2	Polycladomyces
ASV_673	0	19	1	13	0	0	0	0	0	0	0	0	0	0	0	0	0	0	0	0	0	0	0	0	0	0	0	1	0	Bacteria	Proteobacteria	unclassified_Proteobacteria	unclassified_Proteobacteria	unclassified_Proteobacteria	unclassified_Proteobacteria
ASV_675	0	0	0	0	0	0	0	0	0	0	0	0	0	0	29	0	0	0	0	0	0	0	0	0	0	0	0	0	0	Bacteria	Actinobacteria	Actinobacteria	Actinomycetales	Corynebacteriaceae	Corynebacterium
ASV_677	0	0	0	0	0	0	0	0	0	0	0	0	0	0	0	49	0	0	0	0	0	0	0	0	0	0	0	0	0	Bacteria	Proteobacteria	Gammaproteobacteria	Pseudomonadales	Moraxellaceae	Acinetobacter
ASV_678	0	0	0	0	0	0	0	0	0	0	0	0	0	0	0	0	5	2	6	5	2	4	10	4	4	0	5	0	2	Bacteria	Actinobacteria	Actinobacteria	Actinomycetales	Nocardiaceae	Rhodococcus
ASV_679	0	0	0	0	0	0	0	0	0	0	0	0	0	0	0	0	1	3	11	0	3	8	3	6	10	3	1	0	0	Bacteria	Acidobacteria	Acidobacteria_Gp16	Gp16	Gp16	Gp16
ASV_680	0	0	0	0	0	0	0	0	0	0	0	0	0	0	0	0	0	6	3	0	6	0	0	5	11	3	3	9	3	Bacteria	Actinobacteria	Actinobacteria	Actinomycetales	Nocardioidaceae	Nocardioides
ASV_681	1	9	2	5	1	1	0	0	0	0	0	0	0	0	0	0	0	10	0	2	0	0	0	0	0	2	5	1	5	Bacteria	Proteobacteria	Alphaproteobacteria	Sphingomonadales	Sphingomonadaceae	Sphingomonas
ASV_682	0	4	0	33	0	5	0	0	0	0	0	0	0	0	0	0	0	0	0	0	0	0	0	0	0	1	2	0	0	Bacteria	Bacteroidetes	Cytophagia	Cytophagales	Cytophagaceae	Hymenobacter
ASV_683	0	0	0	3	0	0	0	0	0	17	1	19	0	0	0	0	0	0	0	2	4	0	2	0	0	0	0	0	0	Bacteria	Proteobacteria	Betaproteobacteria	Burkholderiales	Oxalobacteraceae	unclassified_Oxalobacteraceae
ASV_685	0	0	0	0	0	0	0	0	0	0	0	0	0	0	0	0	1	0	3	0	4	5	7	2	0	4	6	13	0	Bacteria	Proteobacteria	Alphaproteobacteria	Rhizobiales	Rhizobiales_incertae_sedis	Alsobacter
ASV_686	0	0	0	0	0	0	0	0	0	0	0	0	0	0	0	0	3	2	0	12	3	5	4	0	2	0	1	16	0	Bacteria	Acidobacteria	Acidobacteria_Gp16	Gp16	Gp16	Gp16
ASV_687	0	14	1	19	0	1	0	0	0	0	0	0	0	0	7	0	0	0	0	0	0	0	0	0	0	1	4	0	0	Bacteria	Bacteroidetes	Sphingobacteriia	Sphingobacteriales	Sphingobacteriaceae	Pedobacter
ASV_688	0	1	0	3	3	1	0	0	0	0	0	0	0	0	0	16	2	3	0	0	7	2	2	0	1	1	0	5	0	Bacteria	Acidobacteria	Acidobacteria_Gp3	Gp3	Gp3	Gp3
ASV_691	0	0	0	0	0	0	0	0	0	0	0	0	0	0	0	0	8	3	13	0	14	8	0	0	1	0	0	0	0	Bacteria	Actinobacteria	Actinobacteria	Acidimicrobiales	unclassified_Acidimicrobiales	unclassified_Acidimicrobiales
ASV_692	0	0	0	0	0	0	0	0	0	0	0	0	0	0	0	0	0	6	1	0	0	0	0	0	0	11	7	14	8	Bacteria	Gemmatimonadetes	Gemmatimonadetes	Gemmatimonadales	Gemmatimonadaceae	Gemmatimonas
ASV_693	0	17	0	0	0	0	0	0	0	0	0	0	0	0	0	0	0	0	0	0	0	0	0	0	0	0	0	0	29	Bacteria	Bacteroidetes	Sphingobacteriia	Sphingobacteriales	Sphingobacteriaceae	Sphingobacterium
ASV_694	0	5	5	0	1	16	0	0	0	0	0	0	0	0	14	0	0	0	0	0	0	0	0	0	0	0	0	0	0	Bacteria	Proteobacteria	Betaproteobacteria	Burkholderiales	Oxalobacteraceae	Massilia
ASV_695	0	1	0	0	0	0	0	0	0	0	0	0	0	0	0	0	0	0	0	1	0	2	3	0	0	0	39	0	0	Bacteria	Bacteroidetes	Sphingobacteriia	Sphingobacteriales	Sphingobacteriaceae	Pedobacter
ASV_696	0	0	0	46	0	0	0	0	0	0	0	0	0	0	0	0	0	0	0	0	0	0	0	0	0	0	0	0	0	Bacteria	Actinobacteria	Actinobacteria	Actinomycetales	Microbacteriaceae	unclassified_Microbacteriaceae
ASV_697	0	0	0	0	0	0	0	0	0	0	4	0	0	3	0	0	0	0	0	0	0	0	0	0	0	0	0	0	0	Bacteria	Proteobacteria	Gammaproteobacteria	Enterobacteriales	Enterobacteriaceae	Pectobacterium
ASV_700	0	0	0	0	0	0	0	0	0	0	0	0	0	0	0	0	3	0	0	0	5	0	0	0	0	7	11	5	15	Bacteria	Candidatus Saccharibacteria	Saccharibacteria_genera_incertae_sedis	Saccharibacteria_genera_incertae_sedis	Saccharibacteria_genera_incertae_sedis	Saccharibacteria_genera_incertae_sedis
ASV_701	0	0	0	0	0	0	0	0	0	0	0	0	0	0	0	0	2	12	0	3	10	3	0	0	0	16	0	0	0	Bacteria	Bacteroidetes	Flavobacteriia	Flavobacteriales	Flavobacteriaceae	Flavobacterium
ASV_702	0	0	0	0	0	0	0	0	0	0	0	0	0	0	0	0	0	0	0	0	5	0	16	6	7	7	0	4	1	Bacteria	Actinobacteria	Actinobacteria	Acidimicrobiales	unclassified_Acidimicrobiales	unclassified_Acidimicrobiales
ASV_703	0	0	0	0	0	0	0	0	0	0	0	0	0	0	0	0	0	0	0	0	0	0	0	0	1	7	7	28	3	Bacteria	Proteobacteria	Gammaproteobacteria	Xanthomonadales	Xanthomonadaceae	Arenimonas
ASV_704	0	45	0	0	0	0	0	0	0	0	0	0	0	0	0	0	0	0	0	0	0	0	0	0	0	0	0	0	0	Bacteria	Proteobacteria	Gammaproteobacteria	Pseudomonadales	Pseudomonadaceae	Pseudomonas
ASV_705	0	6	0	8	0	5	0	0	0	0	0	0	0	0	0	0	0	0	0	4	1	1	0	0	0	0	20	0	0	Bacteria	Actinobacteria	Actinobacteria	unclassified_Actinobacteria	unclassified_Actinobacteria	unclassified_Actinobacteria
ASV_708	0	0	0	0	0	0	0	0	0	0	0	0	0	0	45	0	0	0	0	0	0	0	0	0	0	0	0	0	0	Bacteria	Bacteroidetes	Cytophagia	Cytophagales	Cytophagaceae	Hymenobacter
ASV_709	0	0	0	0	0	0	0	0	0	0	0	0	0	0	0	0	0	0	0	0	3	0	0	0	0	14	3	22	3	Bacteria	Proteobacteria	Alphaproteobacteria	Sphingomonadales	Sphingomonadaceae	unclassified_Sphingomonadaceae
ASV_710	4	0	2	11	0	27	0	0	0	0	0	0	0	0	0	0	0	0	0	0	0	0	0	0	0	0	0	0	0	Bacteria	Bacteroidetes	Sphingobacteriia	Sphingobacteriales	Sphingobacteriaceae	Pedobacter
ASV_711	0	1	0	0	0	0	1	0	0	0	0	0	0	0	0	0	0	0	0	0	0	0	0	0	0	4	33	3	2	Bacteria	Bacteroidetes	Sphingobacteriia	Sphingobacteriales	Sphingobacteriaceae	Pedobacter
ASV_712	0	0	0	0	0	0	0	0	8	10	0	0	0	0	0	14	6	0	0	0	0	0	0	0	0	6	0	0	0	Bacteria	Actinobacteria	Actinobacteria	Actinomycetales	Corynebacteriaceae	Corynebacterium
ASV_713	0	0	0	0	0	0	0	0	0	0	0	0	0	0	24	11	0	0	0	0	0	0	0	0	0	0	0	0	0	Bacteria	Actinobacteria	Actinobacteria	Actinomycetales	Corynebacteriaceae	Corynebacterium
ASV_714	0	0	0	0	0	0	0	0	0	0	0	0	0	0	0	44	0	0	0	0	0	0	0	0	0	0	0	0	0	Bacteria	Proteobacteria	Deltaproteobacteria	Myxococcales	Polyangiaceae	Minicystis
ASV_715	0	0	0	0	0	0	0	0	0	0	0	0	0	0	0	0	2	0	0	0	2	8	3	0	0	0	11	13	5	Bacteria	Proteobacteria	Gammaproteobacteria	Xanthomonadales	Xanthomonadaceae	Arenimonas
ASV_716	0	0	0	0	0	0	0	0	0	0	0	0	0	0	0	0	0	44	0	0	0	0	0	0	0	0	0	0	0	Bacteria	Chloroflexi	Ktedonobacteria	Ktedonobacterales	Ktedonobacteraceae	Ktedonobacter
ASV_717	0	0	0	0	0	0	0	0	0	0	0	0	0	0	0	0	0	0	0	0	0	0	0	0	0	0	44	0	0	Bacteria	Proteobacteria	Gammaproteobacteria	Xanthomonadales	Xanthomonadaceae	Stenotrophomonas
ASV_718	9	1	8	16	0	9	0	0	0	0	0	0	0	0	0	0	0	0	0	0	0	0	0	0	0	0	0	0	0	Bacteria	Bacteroidetes	Sphingobacteriia	Sphingobacteriales	Sphingobacteriaceae	Pedobacter
ASV_719	1	0	0	0	0	0	0	0	0	0	0	0	0	0	0	0	8	13	0	8	11	2	0	0	0	0	0	0	0	Bacteria	Proteobacteria	Betaproteobacteria	Burkholderiales	Oxalobacteraceae	Massilia
ASV_720	0	3	0	0	0	0	0	0	0	0	0	0	0	0	0	0	10	4	4	0	1	4	3	0	0	0	4	8	2	Bacteria	Actinobacteria	unclassified_Actinobacteria	unclassified_Actinobacteria	unclassified_Actinobacteria	unclassified_Actinobacteria
ASV_721	0	1	0	5	2	0	3	0	0	5	0	0	0	0	13	0	0	0	0	0	0	0	0	0	0	3	5	5	1	Bacteria	Proteobacteria	Alphaproteobacteria	Caulobacterales	Caulobacteraceae	Brevundimonas
ASV_724	0	0	0	0	0	0	0	0	0	0	0	0	0	0	0	0	5	2	2	0	0	29	1	0	0	2	0	2	0	Bacteria	Firmicutes	Bacilli	Bacillales	Bacillaceae 1	Bacillus
ASV_725	0	0	0	0	0	0	0	0	0	0	0	0	0	0	0	0	0	43	0	0	0	0	0	0	0	0	0	0	0	Bacteria	Proteobacteria	Betaproteobacteria	Burkholderiales	Comamonadaceae	Polaromonas
ASV_726	0	0	0	0	0	0	0	0	0	0	0	0	0	0	0	0	0	7	6	0	0	3	26	0	0	0	0	0	0	Bacteria	Actinobacteria	Actinobacteria	Actinomycetales	Pseudonocardiaceae	Pseudonocardia
ASV_727	0	0	0	0	0	0	0	0	0	0	0	0	0	0	0	0	0	0	0	43	0	0	0	0	0	0	0	0	0	Bacteria	Bacteroidetes	Cytophagia	Cytophagales	Cytophagaceae	Dyadobacter
ASV_728	0	0	0	0	2	0	0	0	0	0	0	0	0	0	0	0	0	0	6	7	3	7	13	0	2	0	2	0	0	Bacteria	Actinobacteria	Actinobacteria	Actinomycetales	unclassified_Actinomycetales	unclassified_Actinomycetales
ASV_729	0	0	0	0	0	0	0	0	0	0	0	0	0	0	42	0	0	0	0	0	0	0	0	0	0	0	0	0	0	Bacteria	Actinobacteria	Actinobacteria	unclassified_Actinobacteria	unclassified_Actinobacteria	unclassified_Actinobacteria
ASV_730	0	0	0	0	0	0	0	0	0	0	0	0	0	0	0	0	0	6	0	2	10	5	0	0	0	0	6	13	0	Bacteria	Proteobacteria	Alphaproteobacteria	Sphingomonadales	Sphingomonadaceae	Sphingomonas
ASV_731	3	0	0	0	0	0	0	0	0	0	3	0	0	0	0	0	0	1	0	3	5	0	0	0	0	8	3	8	3	Bacteria	Proteobacteria	Betaproteobacteria	Burkholderiales	Oxalobacteraceae	unclassified_Oxalobacteraceae
ASV_732	0	10	0	4	1	5	0	0	0	0	0	7	0	0	0	0	0	0	0	0	0	0	0	0	0	0	0	0	0	Bacteria	Bacteroidetes	Cytophagia	Cytophagales	Cytophagaceae	Hymenobacter
ASV_733	0	0	0	0	2	0	0	0	0	0	0	0	0	0	0	0	1	2	2	0	3	2	0	3	1	0	1	0	0	Bacteria	Actinobacteria	Actinobacteria	Actinomycetales	Thermomonosporaceae	Actinoallomurus
ASV_734	0	0	0	0	0	0	41	0	0	0	0	0	0	0	0	0	0	0	0	0	0	0	0	0	0	0	0	0	0	Bacteria	Proteobacteria	Betaproteobacteria	Burkholderiales	Oxalobacteraceae	Duganella
ASV_735	0	0	0	0	0	0	0	0	0	0	0	0	0	0	0	0	3	5	2	5	7	7	5	0	4	2	0	1	0	Bacteria	unclassified_Bacteria	unclassified_Bacteria	unclassified_Bacteria	unclassified_Bacteria	unclassified_Bacteria
ASV_736	0	0	0	0	0	0	0	0	0	0	0	0	0	0	0	0	0	0	0	0	41	0	0	0	0	0	0	0	0	Bacteria	Bacteroidetes	Sphingobacteriia	Sphingobacteriales	Sphingobacteriaceae	Sphingobacterium
ASV_739	0	0	0	0	0	0	0	0	0	0	0	8	0	0	0	0	0	0	0	0	2	0	0	0	0	8	2	20	0	Bacteria	Proteobacteria	Alphaproteobacteria	Sphingomonadales	Erythrobacteraceae	unclassified_Erythrobacteraceae
ASV_740	0	0	0	0	0	0	0	0	0	0	0	0	0	0	0	0	0	0	0	0	0	0	0	0	0	0	0	0	0	Bacteria	unclassified_Bacteria	unclassified_Bacteria	unclassified_Bacteria	unclassified_Bacteria	unclassified_Bacteria
ASV_741	0	0	0	0	0	0	0	0	0	0	0	0	0	40	0	0	0	0	0	0	0	0	0	0	0	0	0	0	0	Bacteria	Chloroflexi	Thermomicrobia	Sphaerobacterales	Sphaerobacteraceae	unclassified_Sphaerobacteraceae
ASV_742	0	0	0	0	0	0	0	0	0	0	0	0	0	0	0	0	9	7	0	4	5	0	0	0	6	0	0	9	0	Bacteria	Actinobacteria	Actinobacteria	Actinomycetales	unclassified_Actinomycetales	unclassified_Actinomycetales
ASV_743	0	0	0	0	0	0	0	0	0	0	0	0	0	0	0	0	3	0	0	0	5	0	0	9	7	0	7	6	3	Bacteria	Actinobacteria	Actinobacteria	Actinomycetales	Micromonosporaceae	unclassified_Micromonosporaceae
ASV_744	0	0	0	0	0	0	0	0	0	0	0	0	0	0	0	0	0	0	40	0	0	0	0	0	0	0	0	0	0	Bacteria	Actinobacteria	Actinobacteria	Actinomycetales	Nocardioidaceae	Kribbella
ASV_745	0	0	0	0	0	0	0	0	0	0	0	0	0	0	0	0	0	0	0	0	0	0	40	0	0	0	0	0	0	Bacteria	Proteobacteria	Gammaproteobacteria	Enterobacteriales	Enterobacteriaceae	unclassified_Enterobacteriaceae
ASV_746	0	4	0	8	0	0	0	0	0	0	0	0	0	0	0	0	0	0	0	0	0	0	0	0	0	0	0	0	0	Bacteria	Firmicutes	Bacilli	Bacillales	Planococcaceae	Paenisporosarcina
ASV_747	0	2	0	0	1	0	0	0	0	4	0	0	0	0	11	0	0	0	0	0	0	0	1	0	0	3	2	3	1	Bacteria	Firmicutes	Bacilli	Bacillales	Paenibacillaceae 1	Paenibacillus
ASV_748	0	0	0	0	2	0	0	0	0	0	0	0	0	0	19	0	0	0	2	0	0	4	6	5	0	1	0	0	0	Bacteria	Actinobacteria	Actinobacteria	Actinomycetales	unclassified_Actinomycetales	unclassified_Actinomycetales
ASV_749	0	0	0	0	0	0	1	0	0	0	0	0	0	0	21	0	8	0	0	0	0	0	3	0	0	0	0	0	6	Bacteria	Firmicutes	Bacilli	Bacillales	Paenibacillaceae 1	Paenibacillus
ASV_752	0	0	0	0	0	0	0	0	0	0	0	0	0	0	0	0	4	0	0	0	9	0	0	0	0	4	11	11	0	Bacteria	Proteobacteria	Betaproteobacteria	Burkholderiales	Oxalobacteraceae	unclassified_Oxalobacteraceae
ASV_753	0	0	0	0	0	0	0	0	0	0	0	0	0	0	0	0	0	39	0	0	0	0	0	0	0	0	0	0	0	Bacteria	Firmicutes	Bacilli	Bacillales	Paenibacillaceae 1	Paenibacillus
ASV_754	0	0	0	0	0	0	0	0	0	0	0	0	0	0	0	0	0	0	0	0	0	0	0	1	12	4	2	19	1	Bacteria	Actinobacteria	Actinobacteria	Actinomycetales	Micromonosporaceae	Actinoplanes
ASV_755	0	0	0	0	0	0	0	0	0	0	0	0	0	0	0	0	0	0	0	0	0	0	0	0	0	0	0	0	39	Bacteria	Actinobacteria	Actinobacteria	Actinomycetales	Nocardiaceae	Rhodococcus
ASV_757	0	0	0	0	0	0	0	0	0	0	14	8	0	0	0	0	0	0	0	0	0	0	0	0	0	0	0	0	0	Bacteria	Proteobacteria	Betaproteobacteria	Burkholderiales	Comamonadaceae	unclassified_Comamonadaceae
ASV_758	0	0	0	0	0	0	0	0	0	0	0	0	0	0	8	0	0	0	0	2	0	0	0	0	0	3	6	13	6	Bacteria	unclassified_Bacteria	unclassified_Bacteria	unclassified_Bacteria	unclassified_Bacteria	unclassified_Bacteria
ASV_759	0	0	0	0	0	0	0	0	0	0	0	0	0	0	0	0	19	11	0	3	0	3	0	0	0	0	0	0	2	Bacteria	Proteobacteria	Betaproteobacteria	Burkholderiales	Oxalobacteraceae	unclassified_Oxalobacteraceae
ASV_760	0	0	0	0	0	0	0	0	0	0	0	0	0	0	0	0	7	6	3	5	0	2	0	0	0	9	1	0	5	Bacteria	Actinobacteria	Actinobacteria	Actinomycetales	Nakamurellaceae	Nakamurella
ASV_761	0	0	0	0	0	0	0	0	0	0	0	0	0	0	0	0	3	2	0	0	9	0	8	1	0	4	0	11	0	Bacteria	Actinobacteria	Actinobacteria	Solirubrobacterales	unclassified_Solirubrobacterales	unclassified_Solirubrobacterales
ASV_762	0	0	0	0	0	0	0	0	0	0	0	0	0	0	0	0	0	0	0	0	0	0	38	0	0	0	0	0	0	Bacteria	Actinobacteria	Actinobacteria	Actinomycetales	Pseudonocardiaceae	Allokutzneria
ASV_763	0	0	0	0	0	0	0	0	0	0	0	0	0	0	0	0	0	0	0	0	0	0	0	0	0	0	15	9	14	Bacteria	Candidatus Saccharibacteria	Saccharibacteria_genera_incertae_sedis	Saccharibacteria_genera_incertae_sedis	Saccharibacteria_genera_incertae_sedis	Saccharibacteria_genera_incertae_sedis
ASV_764	4	0	0	0	0	0	0	0	0	0	12	0	0	0	0	0	0	3	2	0	4	3	6	0	0	0	0	3	0	Bacteria	unclassified_Bacteria	unclassified_Bacteria	unclassified_Bacteria	unclassified_Bacteria	unclassified_Bacteria
ASV_765	0	0	0	2	0	0	0	0	0	0	4	0	0	0	0	0	2	5	0	0	4	2	5	0	0	8	0	5	0	Bacteria	Proteobacteria	Alphaproteobacteria	Rhodospirillales	Rhodospirillaceae	unclassified_Rhodospirillaceae
ASV_767	0	0	0	0	0	0	0	0	0	0	0	0	0	0	0	0	0	0	0	0	6	0	0	0	0	0	3	11	10	Bacteria	Actinobacteria	unclassified_Actinobacteria	unclassified_Actinobacteria	unclassified_Actinobacteria	unclassified_Actinobacteria
ASV_768	0	0	0	0	0	0	0	0	0	0	0	0	0	0	37	0	0	0	0	0	0	0	0	0	0	0	0	0	0	Bacteria	Actinobacteria	Actinobacteria	Actinomycetales	Micromonosporaceae	unclassified_Micromonosporaceae
ASV_769	0	0	0	0	0	0	0	0	0	0	0	0	0	0	0	37	0	0	0	0	0	0	0	0	0	0	0	0	0	Bacteria	Actinobacteria	Actinobacteria	Actinomycetales	Micrococcaceae	unclassified_Micrococcaceae
ASV_770	0	0	0	0	0	0	0	0	0	0	0	0	0	0	0	0	2	2	0	0	0	2	0	0	0	4	8	15	4	Bacteria	Actinobacteria	Actinobacteria	Solirubrobacterales	unclassified_Solirubrobacterales	unclassified_Solirubrobacterales
ASV_771	2	3	0	0	0	0	0	0	0	0	0	0	0	0	13	0	9	0	0	0	0	0	0	0	0	0	0	4	0	Bacteria	Actinobacteria	Actinobacteria	Actinomycetales	Propionibacteriaceae	Friedmanniella
ASV_773	0	0	0	0	0	0	0	0	0	14	7	0	0	0	0	2	0	0	0	0	0	0	0	0	0	0	0	0	0	Bacteria	unclassified_Bacteria	unclassified_Bacteria	unclassified_Bacteria	unclassified_Bacteria	unclassified_Bacteria
ASV_774	0	0	0	0	0	0	0	0	0	0	0	0	0	0	0	0	7	4	5	2	5	4	9	0	0	0	0	0	0	Bacteria	Actinobacteria	Actinobacteria	Actinomycetales	unclassified_Actinomycetales	unclassified_Actinomycetales
ASV_775	0	0	0	0	0	0	0	0	0	0	0	0	0	0	0	0	2	0	1	1	0	16	11	0	0	2	3	0	0	Bacteria	Proteobacteria	Gammaproteobacteria	Xanthomonadales	Xanthomonadaceae	Lysobacter
ASV_776	0	0	0	0	0	0	0	0	0	0	0	0	0	0	0	0	0	0	0	0	0	0	0	0	0	0	0	0	36	Bacteria	Proteobacteria	Alphaproteobacteria	Rhizobiales	Bradyrhizobiaceae	Bosea
ASV_777	0	0	0	1	0	0	0	0	0	0	0	9	0	0	0	0	0	0	0	0	0	0	0	3	0	4	4	3	3	Bacteria	Actinobacteria	Actinobacteria	Actinomycetales	Nocardioidaceae	Nocardioides
ASV_780	0	0	0	0	0	0	0	0	0	0	0	22	0	0	0	0	0	0	0	0	0	0	0	0	0	0	0	0	13	Bacteria	Actinobacteria	Actinobacteria	Actinomycetales	Micrococcaceae	Rothia
ASV_781	0	0	0	0	0	0	0	0	0	0	0	0	0	0	35	0	0	0	0	0	0	0	0	0	0	0	0	0	0	Bacteria	Bacteroidetes	Cytophagia	Cytophagales	Cytophagaceae	Hymenobacter
ASV_782	0	0	0	0	0	0	0	0	0	0	0	0	0	0	35	0	0	0	0	0	0	0	0	0	0	0	0	0	0	Bacteria	Proteobacteria	Betaproteobacteria	Burkholderiales	Oxalobacteraceae	Massilia
ASV_783	0	0	0	0	0	0	0	0	0	0	0	0	0	0	35	0	0	0	0	0	0	0	0	0	0	0	0	0	0	Bacteria	Actinobacteria	Actinobacteria	Actinomycetales	Corynebacteriaceae	Corynebacterium
ASV_784	0	0	0	0	0	0	0	0	0	0	0	0	0	0	0	0	8	23	0	0	2	0	1	0	0	0	0	0	0	Bacteria	Proteobacteria	Deltaproteobacteria	Myxococcales	Nannocystaceae	Nannocystis
ASV_785	0	0	0	0	0	0	0	0	0	0	0	0	0	0	0	0	4	3	1	3	5	0	8	0	0	3	0	8	0	Bacteria	Acidobacteria	Acidobacteria_Gp16	Gp16	Gp16	Gp16
ASV_786	0	0	0	0	0	0	0	0	0	0	0	0	0	0	0	0	0	0	0	0	35	0	0	0	0	0	0	0	0	Bacteria	Actinobacteria	Actinobacteria	Actinomycetales	Nocardiaceae	Gordonia
ASV_787	0	0	0	0	0	0	0	0	0	0	0	0	0	0	0	0	0	0	0	0	0	0	0	0	0	0	0	0	35	Bacteria	Proteobacteria	Alphaproteobacteria	Rhizobiales	Hyphomicrobiaceae	Devosia
ASV_789	0	0	0	0	0	0	0	0	0	0	0	0	0	0	0	0	8	4	0	19	0	0	3	0	0	0	0	0	0	Bacteria	Actinobacteria	Actinobacteria	Actinomycetales	Tsukamurellaceae	Tsukamurella
ASV_790	0	0	0	0	0	0	0	0	0	0	0	0	0	0	0	0	0	34	0	0	0	0	0	0	0	0	0	0	0	Bacteria	Firmicutes	Bacilli	Bacillales	Paenibacillaceae 1	Paenibacillus
ASV_791	0	0	0	0	0	0	0	0	0	0	0	0	0	0	0	0	0	34	0	0	0	0	0	0	0	0	0	0	0	Bacteria	Actinobacteria	Actinobacteria	Actinomycetales	unclassified_Actinomycetales	unclassified_Actinomycetales
ASV_792	0	0	0	0	0	0	0	0	0	0	0	0	0	0	0	0	0	0	0	0	0	0	0	0	0	0	34	0	0	Bacteria	Bacteroidetes	Sphingobacteriia	Sphingobacteriales	Sphingobacteriaceae	Pedobacter
ASV_793	1	0	0	0	0	0	0	0	0	0	0	0	0	0	0	0	0	0	0	0	3	1	0	0	0	3	7	16	2	Bacteria	Proteobacteria	Alphaproteobacteria	Sphingomonadales	unclassified_Sphingomonadales	unclassified_Sphingomonadales
ASV_795	0	0	0	33	0	0	0	0	0	0	0	0	0	0	0	0	0	0	0	0	0	0	0	0	0	0	0	0	0	Bacteria	Proteobacteria	Gammaproteobacteria	Pseudomonadales	Pseudomonadaceae	Pseudomonas
ASV_796	0	0	0	0	0	0	0	0	0	33	0	0	0	0	0	0	0	0	0	0	0	0	0	0	0	0	0	0	0	Bacteria	Firmicutes	Bacilli	Bacillales	Staphylococcaceae	Staphylococcus
ASV_797	0	0	0	0	0	0	0	0	0	0	0	0	0	0	0	33	0	0	0	0	0	0	0	0	0	0	0	0	0	Bacteria	Firmicutes	Bacilli	Lactobacillales	Streptococcaceae	Streptococcus
ASV_798	0	0	0	0	0	0	0	0	0	0	0	0	0	0	0	0	3	0	1	0	8	2	2	4	0	0	10	3	0	Bacteria	Acidobacteria	Acidobacteria_Gp6	Gp6	Gp6	Gp6
ASV_799	0	0	0	0	0	0	0	0	0	0	0	0	0	0	0	0	0	0	0	0	0	0	0	0	0	5	13	11	4	Bacteria	Proteobacteria	Betaproteobacteria	Burkholderiales	Oxalobacteraceae	unclassified_Oxalobacteraceae
ASV_800	0	0	0	0	0	0	0	0	0	0	0	0	0	0	0	0	0	0	0	0	0	0	0	0	0	0	33	0	0	Bacteria	Proteobacteria	Gammaproteobacteria	Xanthomonadales	Xanthomonadaceae	Stenotrophomonas
ASV_801	32	0	0	0	0	0	0	0	0	0	0	0	0	0	0	0	0	0	0	0	0	0	0	0	0	0	0	0	0	Bacteria	Actinobacteria	Actinobacteria	Actinomycetales	Nocardioidaceae	Nocardioides
ASV_802	0	5	0	0	1	0	4	0	0	0	0	0	0	0	0	6	0	0	0	0	0	0	0	5	0	11	0	0	0	Bacteria	Actinobacteria	Actinobacteria	Actinomycetales	Kineosporiaceae	Angustibacter
ASV_803	0	0	0	0	0	0	0	0	0	0	0	0	0	0	0	0	0	0	0	0	0	0	0	0	0	0	0	0	0	Bacteria	Firmicutes	Bacilli	Lactobacillales	Lactobacillaceae	Lactobacillus
ASV_807	0	0	0	0	0	0	0	0	0	0	0	0	0	0	32	0	0	0	0	0	0	0	0	0	0	0	0	0	0	Bacteria	Proteobacteria	Alphaproteobacteria	Rhodospirillales	Rhodospirillaceae	Skermanella
ASV_808	0	0	0	0	0	0	0	0	0	0	0	0	0	0	0	0	0	0	0	0	0	0	28	4	0	0	0	0	0	Bacteria	Proteobacteria	Alphaproteobacteria	Rhodospirillales	Rhodospirillaceae	Inquilinus
ASV_809	0	0	0	0	0	0	0	0	0	0	0	0	0	0	0	0	0	0	0	0	0	0	0	2	0	3	2	18	7	Bacteria	Proteobacteria	Alphaproteobacteria	Rhizobiales	unclassified_Rhizobiales	unclassified_Rhizobiales
ASV_810	0	6	1	0	0	4	4	0	0	0	0	0	0	0	0	0	0	0	0	0	0	0	0	0	0	0	0	0	5	Bacteria	Actinobacteria	Actinobacteria	Solirubrobacterales	Conexibacteraceae	Conexibacter
ASV_813	0	0	0	0	0	0	0	0	0	0	0	3	0	0	0	0	3	2	0	0	0	4	7	3	1	1	2	3	2	Bacteria	Proteobacteria	Alphaproteobacteria	Rhizobiales	unclassified_Rhizobiales	unclassified_Rhizobiales
ASV_814	0	0	0	0	0	0	0	0	0	0	0	0	0	0	31	0	0	0	0	0	0	0	0	0	0	0	0	0	0	Bacteria	Bacteroidetes	Cytophagia	Cytophagales	Cytophagaceae	Hymenobacter
ASV_815	0	0	0	0	0	0	0	0	0	0	0	0	0	0	31	0	0	0	0	0	0	0	0	0	0	0	0	0	0	Bacteria	Proteobacteria	Alphaproteobacteria	Rhizobiales	unclassified_Rhizobiales	unclassified_Rhizobiales
ASV_816	0	0	0	0	0	0	0	0	0	0	0	0	0	0	31	0	0	0	0	0	0	0	0	0	0	0	0	0	0	Bacteria	Proteobacteria	Betaproteobacteria	Burkholderiales	Oxalobacteraceae	Noviherbaspirillum
ASV_817	0	0	0	0	0	0	0	0	0	0	0	0	0	0	0	0	1	0	3	0	0	1	4	5	0	5	0	6	6	Bacteria	Proteobacteria	Alphaproteobacteria	Rhizobiales	Rhizobiales_incertae_sedis	Alsobacter
ASV_818	0	0	0	0	0	0	0	0	0	0	0	0	0	0	0	0	0	6	0	15	0	4	6	0	0	0	0	0	0	Bacteria	Gemmatimonadetes	Gemmatimonadetes	Gemmatimonadales	Gemmatimonadaceae	Gemmatimonas
ASV_819	0	0	0	0	0	0	0	0	0	0	0	0	0	0	0	0	0	0	0	3	6	8	0	0	0	0	6	4	3	Bacteria	Acidobacteria	Acidobacteria_Gp6	Gp6	Gp6	Gp6
ASV_820	0	0	0	0	0	0	0	0	0	0	0	0	0	0	0	0	0	0	13	0	0	0	16	1	0	0	1	0	0	Bacteria	Actinobacteria	Actinobacteria	Acidimicrobiales	Iamiaceae	unclassified_Iamiaceae
ASV_821	0	0	0	0	30	0	0	0	0	0	0	0	0	0	0	0	0	0	0	0	0	0	0	0	0	0	0	0	0	Bacteria	Proteobacteria	Gammaproteobacteria	Pseudomonadales	Pseudomonadaceae	Pseudomonas
ASV_822	0	0	0	0	0	0	0	0	0	0	11	0	0	0	0	0	4	0	2	0	4	6	0	0	2	0	0	1	0	Bacteria	Actinobacteria	Actinobacteria	Solirubrobacterales	unclassified_Solirubrobacterales	unclassified_Solirubrobacterales
ASV_824	0	0	0	0	0	0	0	0	0	0	0	0	0	0	0	0	0	0	0	0	0	0	0	0	0	0	0	0	0	Bacteria	Bacteroidetes	Cytophagia	Cytophagales	Cytophagaceae	Hymenobacter
ASV_825	0	0	0	0	0	0	0	0	0	0	0	0	0	0	0	0	0	0	30	0	0	0	0	0	0	0	0	0	0	Bacteria	Actinobacteria	Actinobacteria	Actinomycetales	Nocardioidaceae	Marmoricola
ASV_826	29	0	0	0	0	0	0	0	0	0	0	0	0	0	0	0	0	0	0	0	0	0	0	0	0	0	0	0	0	Bacteria	Proteobacteria	Gammaproteobacteria	Pseudomonadales	Pseudomonadaceae	Pseudomonas
ASV_827	0	4	0	0	0	0	0	0	0	0	0	0	0	0	0	0	0	0	0	0	0	0	1	0	0	3	15	6	0	Bacteria	Bacteroidetes	Sphingobacteriia	Sphingobacteriales	Sphingobacteriaceae	Pedobacter
ASV_828	0	1	17	0	0	1	0	0	0	0	0	0	0	0	0	0	0	0	0	0	0	0	0	0	0	0	6	0	0	Bacteria	Bacteroidetes	Flavobacteriia	Flavobacteriales	Flavobacteriaceae	Flavobacterium
ASV_829	0	1	0	0	0	0	0	0	0	0	0	3	0	0	8	0	0	5	0	0	0	2	0	0	2	6	0	2	0	Bacteria	Acidobacteria	Acidobacteria_Gp6	Gp6	Gp6	Gp6
ASV_832	0	0	0	0	0	0	0	0	0	0	0	0	0	0	0	0	0	0	0	0	0	0	0	0	0	0	0	0	0	Bacteria	Bacteroidetes	Cytophagia	Cytophagales	Cytophagaceae	Dyadobacter
ASV_833	0	0	0	0	0	0	0	0	0	0	0	0	0	0	0	29	0	0	0	0	0	0	0	0	0	0	0	0	0	Bacteria	Actinobacteria	Actinobacteria	Actinomycetales	Micrococcaceae	Kocuria
ASV_834	0	0	0	0	0	0	0	0	0	0	0	0	0	0	0	0	29	0	0	0	0	0	0	0	0	0	0	0	0	Bacteria	Proteobacteria	Betaproteobacteria	Burkholderiales	Oxalobacteraceae	Massilia
ASV_835	0	0	0	0	0	0	0	0	0	0	0	0	0	0	0	0	7	9	0	5	2	3	3	0	0	0	0	0	0	Bacteria	Proteobacteria	Betaproteobacteria	Burkholderiales	Oxalobacteraceae	Massilia
ASV_836	0	0	0	0	0	0	0	0	0	0	0	0	0	0	0	0	3	0	2	4	10	2	4	2	0	0	2	0	0	Bacteria	Chloroflexi	Thermomicrobia	Sphaerobacterales	Sphaerobacteraceae	unclassified_Sphaerobacteraceae
ASV_837	0	0	0	0	0	0	0	0	0	0	0	0	0	0	0	0	0	0	29	0	0	0	0	0	0	0	0	0	0	Bacteria	Actinobacteria	Actinobacteria	Actinomycetales	Nocardioidaceae	unclassified_Nocardioidaceae
ASV_838	0	0	0	0	0	0	0	0	0	0	0	0	0	0	0	0	0	0	11	0	0	0	0	0	18	0	0	0	0	Bacteria	Actinobacteria	Actinobacteria	Actinomycetales	Nocardioidaceae	Nocardioides
ASV_839	0	0	0	0	0	0	0	0	0	0	0	0	0	0	0	0	0	0	0	29	0	0	0	0	0	0	0	0	0	Bacteria	Proteobacteria	Betaproteobacteria	Burkholderiales	Comamonadaceae	Rhodoferax
ASV_840	0	0	0	0	0	0	0	0	0	0	0	0	0	0	0	0	0	0	0	1	0	0	0	0	9	8	0	11	0	Bacteria	Actinobacteria	Actinobacteria	Actinomycetales	Pseudonocardiaceae	Labedaea
ASV_841	0	0	0	0	0	0	0	0	0	0	0	0	0	0	0	0	0	0	0	0	0	0	0	0	0	0	0	29	0	Bacteria	Proteobacteria	Alphaproteobacteria	Rhizobiales	Phyllobacteriaceae	Mesorhizobium
ASV_842	0	0	0	28	0	0	0	0	0	0	0	0	0	0	0	0	0	0	0	0	0	0	0	0	0	0	0	0	0	Bacteria	Actinobacteria	Actinobacteria	Actinomycetales	Microbacteriaceae	unclassified_Microbacteriaceae
ASV_843	0	0	0	0	1	0	0	0	0	0	0	0	0	0	0	0	2	0	1	0	0	0	1	8	5	3	1	5	1	Bacteria	Actinobacteria	Actinobacteria	Actinomycetales	Microbacteriaceae	unclassified_Microbacteriaceae
ASV_846	0	0	0	0	0	0	0	0	0	0	0	0	0	0	0	0	0	0	0	0	0	0	0	0	0	0	0	0	0	Bacteria	Actinobacteria	Actinobacteria	Actinomycetales	Micrococcaceae	Arthrobacter
ASV_847	0	0	0	0	0	0	0	0	0	0	0	0	0	0	28	0	0	0	0	0	0	0	0	0	0	0	0	0	0	Bacteria	Actinobacteria	Actinobacteria	Actinomycetales	unclassified_Actinomycetales	unclassified_Actinomycetales
ASV_848	0	0	0	0	0	0	0	0	0	0	0	0	0	0	28	0	0	0	0	0	0	0	0	0	0	0	0	0	0	Bacteria	Actinobacteria	Actinobacteria	Actinomycetales	Nocardioidaceae	Nocardioides
ASV_849	0	0	0	0	0	0	0	0	0	0	0	0	0	0	0	0	0	1	0	3	0	0	0	0	0	11	3	5	5	Bacteria	Acidobacteria	Acidobacteria_Gp16	Gp16	Gp16	Gp16
ASV_850	0	0	0	0	0	0	0	0	0	0	0	0	0	0	0	0	0	0	0	0	0	0	0	0	0	0	0	0	28	Bacteria	Bacteroidetes	Sphingobacteriia	Sphingobacteriales	Sphingobacteriaceae	Pedobacter
ASV_851	0	0	0	0	2	0	0	0	0	0	0	0	0	3	0	0	2	0	2	0	1	0	2	0	5	0	0	9	1	Bacteria	Actinobacteria	unclassified_Actinobacteria	unclassified_Actinobacteria	unclassified_Actinobacteria	unclassified_Actinobacteria
ASV_852	0	0	0	0	0	27	0	0	0	0	0	0	0	0	0	0	0	0	0	0	0	0	0	0	0	0	0	0	0	Bacteria	Proteobacteria	Betaproteobacteria	Burkholderiales	Oxalobacteraceae	Massilia
ASV_853	0	0	0	0	0	0	0	0	0	0	0	0	0	0	0	0	0	0	0	0	0	0	0	0	0	0	0	0	0	Bacteria	Actinobacteria	Actinobacteria	Actinomycetales	Corynebacteriaceae	Corynebacterium
ASV_854	0	0	0	0	0	0	0	0	0	0	0	0	0	0	0	0	0	2	0	8	0	0	0	0	0	0	0	4	2	Bacteria	Actinobacteria	Actinobacteria	Solirubrobacterales	Solirubrobacteraceae	Solirubrobacter
ASV_858	0	0	0	0	0	0	0	0	0	0	0	0	0	0	27	0	0	0	0	0	0	0	0	0	0	0	0	0	0	Bacteria	Chloroflexi	unclassified_Chloroflexi	unclassified_Chloroflexi	unclassified_Chloroflexi	unclassified_Chloroflexi
ASV_859	0	0	0	0	0	0	0	0	0	0	0	0	0	0	2	0	0	2	0	0	1	0	5	11	4	0	2	0	0	Bacteria	Actinobacteria	Actinobacteria	Actinomycetales	Nocardiaceae	Nocardia
ASV_860	0	0	0	0	0	0	0	0	0	0	0	0	0	0	0	0	5	10	0	2	0	4	0	0	0	0	0	6	0	Bacteria	Verrucomicrobia	Spartobacteria	Spartobacteria_genera_incertae_sedis	Spartobacteria_genera_incertae_sedis	Spartobacteria_genera_incertae_sedis
ASV_861	0	0	0	0	0	0	0	0	0	0	0	0	0	0	0	0	4	0	9	0	0	0	9	0	0	3	0	2	0	Bacteria	Actinobacteria	Actinobacteria	unclassified_Actinobacteria	unclassified_Actinobacteria	unclassified_Actinobacteria
ASV_862	0	0	0	0	0	0	0	0	0	0	0	0	0	0	0	0	0	10	0	3	0	0	0	0	0	0	14	0	0	Bacteria	Proteobacteria	Betaproteobacteria	Methylophilales	Methylophilaceae	unclassified_Methylophilaceae
ASV_863	0	0	0	0	0	0	0	0	0	0	0	0	0	0	0	0	0	2	0	2	0	2	0	1	1	3	5	4	7	Bacteria	Proteobacteria	Deltaproteobacteria	Bdellovibrionales	Bacteriovoracaceae	Peredibacter
ASV_864	0	0	0	0	0	0	0	0	0	0	0	0	0	0	0	0	0	0	0	0	0	0	0	3	0	8	8	8	0	Bacteria	Actinobacteria	Actinobacteria	Solirubrobacterales	Solirubrobacteraceae	Solirubrobacter
ASV_865	0	0	0	0	0	0	0	0	0	0	0	0	0	0	0	0	0	0	0	0	0	0	0	0	27	0	0	0	0	Bacteria	Actinobacteria	Actinobacteria	Actinomycetales	Pseudonocardiaceae	Pseudonocardia
ASV_866	0	0	0	0	0	0	0	0	0	0	0	0	0	0	0	0	0	0	0	0	0	0	0	0	0	0	27	0	0	Bacteria	Candidatus Saccharibacteria	Saccharibacteria_genera_incertae_sedis	Saccharibacteria_genera_incertae_sedis	Saccharibacteria_genera_incertae_sedis	Saccharibacteria_genera_incertae_sedis
ASV_868	0	0	0	0	0	0	0	0	0	0	26	0	0	0	0	0	0	0	0	0	0	0	0	0	0	0	0	0	0	Bacteria	Actinobacteria	Actinobacteria	Actinomycetales	Mycobacteriaceae	Mycobacterium
ASV_870	0	0	0	0	0	0	0	0	0	0	0	0	0	0	26	0	0	0	0	0	0	0	0	0	0	0	0	0	0	Bacteria	Firmicutes	Bacilli	Bacillales	Planococcaceae	Sporosarcina
ASV_872	0	0	0	0	0	0	0	0	0	0	0	0	0	0	0	0	0	4	0	0	3	1	9	0	0	0	0	0	8	Bacteria	Proteobacteria	Alphaproteobacteria	Sphingomonadales	Sphingomonadaceae	Sphingopyxis
ASV_873	0	0	0	0	0	0	0	0	0	0	0	0	0	0	0	0	0	0	0	0	0	0	26	0	0	0	0	0	0	Bacteria	Proteobacteria	Alphaproteobacteria	Sphingomonadales	Sphingomonadaceae	unclassified_Sphingomonadaceae
ASV_874	0	0	0	0	0	0	0	0	0	0	0	0	0	0	0	0	0	0	0	0	0	0	0	3	0	10	0	0	13	Bacteria	Firmicutes	Bacilli	Bacillales	Paenibacillaceae 1	Cohnella
ASV_875	0	0	0	0	0	0	0	0	0	0	0	0	0	0	0	0	0	0	0	0	0	0	0	0	0	0	26	0	0	Bacteria	Proteobacteria	Alphaproteobacteria	Rhizobiales	Hyphomicrobiaceae	Devosia
ASV_876	0	0	0	0	0	0	0	0	0	0	0	0	0	0	0	0	0	0	0	0	0	0	0	0	0	0	0	0	26	Bacteria	Bacteroidetes	Sphingobacteriia	Sphingobacteriales	Sphingobacteriaceae	Pedobacter
ASV_877	0	0	0	0	0	0	0	0	0	0	0	0	0	0	0	0	0	0	0	0	0	0	0	0	0	0	0	0	26	Bacteria	Bacteroidetes	Cytophagia	Cytophagales	Cytophagaceae	Dyadobacter
ASV_883	0	0	0	0	0	0	0	0	0	0	0	0	0	0	0	0	3	0	4	0	0	0	0	4	1	5	0	3	4	Bacteria	Actinobacteria	Actinobacteria	unclassified_Actinobacteria	unclassified_Actinobacteria	unclassified_Actinobacteria
ASV_884	0	0	0	0	0	0	0	0	0	0	0	0	0	0	0	0	1	0	6	0	0	0	12	6	0	0	0	0	0	Bacteria	Actinobacteria	Actinobacteria	Actinomycetales	Mycobacteriaceae	Mycobacterium
ASV_885	0	0	0	0	0	0	0	0	0	0	0	0	0	0	0	0	0	0	0	0	0	0	25	0	0	0	0	0	0	Bacteria	Proteobacteria	Alphaproteobacteria	Rhizobiales	Phyllobacteriaceae	Mesorhizobium
ASV_886	0	0	0	0	0	0	0	0	0	0	0	0	0	0	0	0	0	0	0	0	0	0	25	0	0	0	0	0	0	Bacteria	Proteobacteria	Alphaproteobacteria	Rhizobiales	Methylobacteriaceae	Microvirga
ASV_887	0	0	0	0	0	0	0	0	0	0	0	0	0	0	0	0	0	0	0	0	0	0	0	0	0	0	0	25	0	Bacteria	Proteobacteria	Alphaproteobacteria	Sphingomonadales	Sphingomonadaceae	Sphingomonas
ASV_888	0	0	3	3	0	0	0	0	0	0	0	0	0	8	0	10	0	0	0	0	0	0	0	0	0	0	0	0	0	Bacteria	Actinobacteria	Actinobacteria	Actinomycetales	Propionibacteriaceae	Microlunatus
ASV_889	0	0	2	0	1	1	0	0	0	0	0	0	0	0	0	0	0	0	0	4	0	0	3	0	1	0	3	9	0	Bacteria	Acidobacteria	Acidobacteria_Gp3	Gp3	Gp3	Gp3
ASV_890	0	0	0	24	0	0	0	0	0	0	0	0	0	0	0	0	0	0	0	0	0	0	0	0	0	0	0	0	0	Bacteria	Proteobacteria	Gammaproteobacteria	Pseudomonadales	Pseudomonadaceae	Pseudomonas
ASV_891	0	0	0	0	0	24	0	0	0	0	0	0	0	0	0	0	0	0	0	0	0	0	0	0	0	0	0	0	0	Bacteria	Bacteroidetes	Flavobacteriia	Flavobacteriales	Flavobacteriaceae	Flavobacterium
ASV_895	0	0	0	0	0	0	0	0	0	0	0	14	0	0	0	0	0	1	0	0	0	0	0	0	0	0	0	0	9	Bacteria	Proteobacteria	Gammaproteobacteria	Pseudomonadales	Moraxellaceae	Psychrobacter
ASV_897	0	0	0	0	0	0	0	0	0	0	0	0	0	0	24	0	0	0	0	0	0	0	0	0	0	0	0	0	0	Bacteria	Actinobacteria	Actinobacteria	Actinomycetales	unclassified_Actinomycetales	unclassified_Actinomycetales
ASV_898	0	0	0	0	0	0	0	0	0	0	0	0	0	0	24	0	0	0	0	0	0	0	0	0	0	0	0	0	0	Bacteria	Firmicutes	Bacilli	Bacillales	Bacillaceae 1	Bacillus
ASV_900	0	0	0	0	0	0	0	0	0	0	0	0	0	0	24	0	0	0	0	0	0	0	0	0	0	0	0	0	0	Bacteria	Proteobacteria	Deltaproteobacteria	Bdellovibrionales	Bdellovibrionaceae	Bdellovibrio
ASV_901	0	0	0	0	0	0	0	0	0	0	0	0	0	0	0	0	0	0	0	0	0	0	0	0	0	0	0	0	0	Bacteria	Proteobacteria	Alphaproteobacteria	Rhizobiales	Aurantimonadaceae	Aureimonas
ASV_902	0	0	0	0	0	0	0	0	0	0	0	0	0	0	0	24	0	0	0	0	0	0	0	0	0	0	0	0	0	Bacteria	Firmicutes	Bacilli	Bacillales	Staphylococcaceae	Staphylococcus
ASV_903	0	0	0	0	0	0	0	0	0	0	0	0	0	0	0	0	0	0	0	0	24	0	0	0	0	0	0	0	0	Bacteria	Proteobacteria	Betaproteobacteria	Burkholderiales	Comamonadaceae	Polaromonas
ASV_904	0	0	0	0	0	0	0	0	0	0	0	0	0	0	0	0	0	0	0	0	0	2	9	8	0	0	0	0	5	Bacteria	Actinobacteria	Actinobacteria	Actinomycetales	Micromonosporaceae	Rhizocola
ASV_905	0	23	0	0	0	0	0	0	0	0	0	0	0	0	0	0	0	0	0	0	0	0	0	0	0	0	0	0	0	Bacteria	Proteobacteria	Gammaproteobacteria	Pseudomonadales	Pseudomonadaceae	Pseudomonas
ASV_906	0	13	0	0	0	0	0	0	0	0	0	0	0	0	0	0	0	10	0	0	0	0	0	0	0	0	0	0	0	Bacteria	Proteobacteria	Betaproteobacteria	Burkholderiales	Alcaligenaceae	unclassified_Alcaligenaceae
ASV_907	0	0	1	0	0	0	0	0	0	0	0	0	0	0	0	0	0	0	0	4	6	0	0	0	4	3	0	4	0	Bacteria	Proteobacteria	Alphaproteobacteria	Rhodospirillales	Acetobacteraceae	unclassified_Acetobacteraceae
ASV_908	0	0	0	0	23	0	0	0	0	0	0	0	0	0	0	0	0	0	0	0	0	0	0	0	0	0	0	0	0	Bacteria	Actinobacteria	Actinobacteria	Actinomycetales	unclassified_Actinomycetales	unclassified_Actinomycetales
ASV_912	0	0	0	0	0	0	0	0	0	0	0	0	0	0	0	0	23	0	0	0	0	0	0	0	0	0	0	0	0	Bacteria	Actinobacteria	Actinobacteria	Actinomycetales	Promicromonosporaceae	unclassified_Promicromonosporaceae
ASV_913	0	0	0	0	0	0	0	0	0	0	0	0	0	0	0	0	0	0	0	9	14	0	0	0	0	0	0	0	0	Bacteria	Actinobacteria	Actinobacteria	Actinomycetales	Micromonosporaceae	unclassified_Micromonosporaceae
ASV_914	0	0	0	0	0	0	0	0	0	0	0	0	0	0	0	0	0	0	0	0	0	0	0	0	0	0	10	13	0	Bacteria	unclassified_Bacteria	unclassified_Bacteria	unclassified_Bacteria	unclassified_Bacteria	unclassified_Bacteria
ASV_915	0	0	0	0	0	0	0	0	0	0	0	0	0	0	0	0	0	0	0	0	0	0	0	0	0	0	0	23	0	Bacteria	Proteobacteria	Alphaproteobacteria	Sphingomonadales	Sphingomonadaceae	Sphingobium
ASV_916	22	0	0	0	0	0	0	0	0	0	0	0	0	0	0	0	0	0	0	0	0	0	0	0	0	0	0	0	0	Bacteria	Actinobacteria	Actinobacteria	Actinomycetales	Micrococcaceae	unclassified_Micrococcaceae
ASV_918	0	0	0	0	0	0	0	0	0	0	0	0	0	0	22	0	0	0	0	0	0	0	0	0	0	0	0	0	0	Bacteria	Actinobacteria	Actinobacteria	Solirubrobacterales	Conexibacteraceae	Conexibacter
ASV_919	0	0	0	0	0	0	0	0	0	0	0	0	0	0	22	0	0	0	0	0	0	0	0	0	0	0	0	0	0	Bacteria	Actinobacteria	Actinobacteria	Actinomycetales	Mycobacteriaceae	Mycobacterium
ASV_920	0	0	0	0	0	0	0	0	0	0	0	0	0	0	22	0	0	0	0	0	0	0	0	0	0	0	0	0	0	Bacteria	Proteobacteria	Gammaproteobacteria	Pseudomonadales	Moraxellaceae	Acinetobacter
ASV_921	0	0	0	0	0	0	0	0	0	0	0	0	0	0	22	0	0	0	0	0	0	0	0	0	0	0	0	0	0	Bacteria	Firmicutes	Clostridia	Clostridiales	Clostridiaceae 1	Clostridium sensu stricto
ASV_922	0	0	0	0	0	0	0	0	0	0	0	0	0	0	0	0	0	0	22	0	0	0	0	0	0	0	0	0	0	Bacteria	Actinobacteria	Actinobacteria	Actinomycetales	Nocardioidaceae	Kribbella
ASV_923	0	0	0	0	0	0	0	0	0	0	0	0	0	0	0	0	0	0	0	0	0	0	3	5	0	10	4	0	0	Bacteria	Actinobacteria	Actinobacteria	Solirubrobacterales	Patulibacteraceae	Patulibacter
ASV_924	0	0	0	0	0	0	0	0	0	0	0	0	0	0	0	0	0	0	0	0	0	0	0	0	22	0	0	0	0	Bacteria	Actinobacteria	Actinobacteria	Actinomycetales	Catenulisporaceae	Catenulispora
ASV_925	0	0	0	0	0	0	0	0	0	0	0	0	0	0	0	0	0	0	0	0	0	0	0	0	0	0	0	0	22	Bacteria	Bacteroidetes	Sphingobacteriia	Sphingobacteriales	Sphingobacteriaceae	Pedobacter
ASV_926	0	0	1	0	0	0	0	0	0	0	0	0	0	0	0	9	0	0	2	0	3	0	0	0	3	0	0	3	0	Bacteria	unclassified_Bacteria	unclassified_Bacteria	unclassified_Bacteria	unclassified_Bacteria	unclassified_Bacteria
ASV_927	0	0	0	2	0	0	0	0	0	0	5	0	0	0	0	0	0	0	0	0	0	0	0	0	0	6	0	0	0	Bacteria	Proteobacteria	Alphaproteobacteria	Rhodospirillales	Acetobacteraceae	unclassified_Acetobacteraceae
ASV_928	0	0	0	0	21	0	0	0	0	0	0	0	0	0	0	0	0	0	0	0	0	0	0	0	0	0	0	0	0	Bacteria	Proteobacteria	Gammaproteobacteria	Pseudomonadales	Pseudomonadaceae	Pseudomonas
ASV_929	0	0	0	0	3	0	1	0	0	0	0	0	0	0	0	0	0	1	0	2	0	3	2	3	0	0	4	2	0	Bacteria	Actinobacteria	Actinobacteria	Solirubrobacterales	Solirubrobacteraceae	Solirubrobacter
ASV_930	0	0	0	0	0	0	0	21	0	0	0	0	0	0	0	0	0	0	0	0	0	0	0	0	0	0	0	0	0	Bacteria	Bacteroidetes	Sphingobacteriia	Sphingobacteriales	Sphingobacteriaceae	Pedobacter
ASV_931	0	0	0	0	0	0	0	2	6	1	0	0	0	8	0	0	0	0	0	0	0	0	0	0	0	0	0	0	0	Bacteria	Proteobacteria	Gammaproteobacteria	Pseudomonadales	Moraxellaceae	Acinetobacter
ASV_932	0	0	0	0	0	0	0	0	0	0	8	0	0	0	0	0	0	0	0	0	0	0	0	0	0	0	0	0	0	Bacteria	unclassified_Bacteria	unclassified_Bacteria	unclassified_Bacteria	unclassified_Bacteria	unclassified_Bacteria
ASV_934	0	0	0	0	0	0	0	0	0	0	0	21	0	0	0	0	0	0	0	0	0	0	0	0	0	0	0	0	0	Bacteria	Proteobacteria	Alphaproteobacteria	Rhodospirillales	Rhodospirillaceae	Skermanella
ASV_937	0	0	0	0	0	0	0	0	0	0	0	0	0	0	0	0	0	2	0	3	2	0	0	0	0	2	6	2	0	Bacteria	Firmicutes	Bacilli	Bacillales	Bacillaceae 1	Bacillus
ASV_939	0	0	0	0	0	0	0	0	0	0	0	0	0	0	21	0	0	0	0	0	0	0	0	0	0	0	0	0	0	Bacteria	Proteobacteria	Betaproteobacteria	Burkholderiales	Oxalobacteraceae	Massilia
ASV_940	0	0	0	0	0	0	0	0	0	0	0	0	0	0	0	21	0	0	0	0	0	0	0	0	0	0	0	0	0	Bacteria	Firmicutes	Negativicutes	Selenomonadales	Veillonellaceae	Dialister
ASV_941	0	0	0	0	0	0	0	0	0	0	0	0	0	0	0	21	0	0	0	0	0	0	0	0	0	0	0	0	0	Bacteria	Firmicutes	Negativicutes	Selenomonadales	Veillonellaceae	Dialister
ASV_942	0	0	0	0	0	0	0	0	0	0	0	0	0	0	0	0	21	0	0	0	0	0	0	0	0	0	0	0	0	Bacteria	Actinobacteria	Actinobacteria	Actinomycetales	Kineosporiaceae	Kineococcus
ASV_943	0	0	0	0	0	0	0	0	0	0	0	0	0	0	0	0	0	4	0	2	4	0	0	0	0	1	1	6	3	Bacteria	Proteobacteria	Gammaproteobacteria	Xanthomonadales	Xanthomonadaceae	Lysobacter
ASV_944	0	0	0	0	0	0	0	0	0	0	0	0	0	0	0	0	0	0	0	0	0	0	21	0	0	0	0	0	0	Bacteria	Actinobacteria	Actinobacteria	Actinomycetales	Nocardioidaceae	unclassified_Nocardioidaceae
ASV_945	0	0	0	0	0	0	0	0	0	0	0	0	0	0	0	0	0	0	0	0	0	0	0	0	0	21	0	0	0	Bacteria	Actinobacteria	Actinobacteria	Actinomycetales	Micromonosporaceae	Actinoplanes
ASV_946	0	0	0	0	0	0	0	0	0	0	0	0	0	0	0	0	0	0	0	0	0	0	0	0	0	0	21	0	0	Bacteria	Actinobacteria	Actinobacteria	Actinomycetales	Nocardioidaceae	Nocardioides
ASV_947	0	0	0	0	0	0	0	0	0	0	0	0	0	0	0	0	0	0	0	0	0	0	0	0	0	0	21	0	0	Bacteria	Proteobacteria	Gammaproteobacteria	Enterobacteriales	Enterobacteriaceae	Erwinia
ASV_948	0	0	0	0	0	0	0	0	0	0	0	0	0	0	0	0	0	0	0	0	0	0	0	0	0	0	0	21	0	Bacteria	Actinobacteria	Actinobacteria	Actinomycetales	Micromonosporaceae	unclassified_Micromonosporaceae
ASV_949	0	0	0	0	0	0	0	0	0	0	0	0	0	0	0	0	0	0	0	0	0	0	0	0	0	0	0	0	21	Bacteria	Proteobacteria	Gammaproteobacteria	Pseudomonadales	Pseudomonadaceae	Pseudomonas
ASV_950	0	20	0	0	0	0	0	0	0	0	0	0	0	0	0	0	0	0	0	0	0	0	0	0	0	0	0	0	0	Bacteria	Bacteroidetes	Flavobacteriia	Flavobacteriales	Flavobacteriaceae	unclassified_Flavobacteriaceae
ASV_951	0	4	0	0	0	0	0	0	0	0	0	0	0	0	0	0	0	0	0	0	0	0	0	0	0	7	0	5	4	Bacteria	Planctomycetes	Planctomycetia	Planctomycetales	Planctomycetaceae	unclassified_Planctomycetaceae
ASV_952	0	4	0	0	0	0	0	0	0	0	0	0	0	2	0	0	0	0	0	0	0	0	0	5	7	2	0	0	0	Bacteria	Actinobacteria	Actinobacteria	Acidimicrobiales	Acidimicrobiaceae	Ilumatobacter
ASV_953	0	0	0	0	20	0	0	0	0	0	0	0	0	0	0	0	0	0	0	0	0	0	0	0	0	0	0	0	0	Bacteria	Proteobacteria	Gammaproteobacteria	Pseudomonadales	Pseudomonadaceae	Pseudomonas
ASV_954	0	0	0	0	0	20	0	0	0	0	0	0	0	0	0	0	0	0	0	0	0	0	0	0	0	0	0	0	0	Bacteria	Actinobacteria	Actinobacteria	Actinomycetales	Microbacteriaceae	Frondihabitans
ASV_957	0	0	0	0	0	0	0	0	0	0	0	0	0	0	20	0	0	0	0	0	0	0	0	0	0	0	0	0	0	Bacteria	Actinobacteria	Actinobacteria	Actinomycetales	Nocardioidaceae	Marmoricola
ASV_958	0	0	0	0	0	0	0	0	0	0	0	0	0	0	20	0	0	0	0	0	0	0	0	0	0	0	0	0	0	Bacteria	Actinobacteria	Actinobacteria	Bifidobacteriales	Bifidobacteriaceae	Gardnerella
ASV_959	0	0	0	0	0	0	0	0	0	0	0	0	0	0	20	0	0	0	0	0	0	0	0	0	0	0	0	0	0	Bacteria	Firmicutes	Clostridia	Clostridiales	Clostridiales_Incertae Sedis XI	Gallicola
ASV_960	0	0	0	0	0	0	0	0	0	0	0	0	0	0	20	0	0	0	0	0	0	0	0	0	0	0	0	0	0	Bacteria	Actinobacteria	Actinobacteria	Actinomycetales	Nocardioidaceae	unclassified_Nocardioidaceae
ASV_961	0	0	0	0	0	0	0	0	0	0	0	0	0	0	0	20	0	0	0	0	0	0	0	0	0	0	0	0	0	Bacteria	Firmicutes	Bacilli	Lactobacillales	Streptococcaceae	Streptococcus
ASV_962	0	0	0	0	0	0	0	0	0	0	0	0	0	0	0	20	0	0	0	0	0	0	0	0	0	0	0	0	0	Bacteria	Actinobacteria	Actinobacteria	Actinomycetales	Geodermatophilaceae	Modestobacter
ASV_963	0	0	0	0	0	0	0	0	0	0	0	0	0	0	0	0	10	5	0	2	3	0	0	0	0	0	0	0	0	Bacteria	Firmicutes	Bacilli	Bacillales	Thermoactinomycetaceae 1	unclassified_Thermoactinomycetaceae 1
ASV_964	0	0	0	0	0	0	0	0	0	0	0	0	0	0	0	0	0	0	0	6	3	6	1	0	0	0	0	0	4	Bacteria	unclassified_Bacteria	unclassified_Bacteria	unclassified_Bacteria	unclassified_Bacteria	unclassified_Bacteria
ASV_965	0	0	0	0	0	0	0	0	0	0	0	0	0	0	0	0	0	0	0	0	0	0	20	0	0	0	0	0	0	Bacteria	Proteobacteria	Alphaproteobacteria	Caulobacterales	Caulobacteraceae	Brevundimonas
ASV_966	0	0	0	0	0	0	0	0	0	0	0	0	0	0	0	0	0	0	0	0	0	0	20	0	0	0	0	0	0	Bacteria	Proteobacteria	Alphaproteobacteria	Rhizobiales	Hyphomicrobiaceae	Devosia
ASV_967	0	19	0	0	0	0	0	0	0	0	0	0	0	0	0	0	0	0	0	0	0	0	0	0	0	0	0	0	0	Bacteria	Bacteroidetes	Sphingobacteriia	Sphingobacteriales	Sphingobacteriaceae	Pedobacter
ASV_968	0	0	0	0	0	3	0	0	0	0	0	0	0	0	0	0	0	3	0	0	0	0	0	0	0	6	0	6	1	Bacteria	Chloroflexi	unclassified_Chloroflexi	unclassified_Chloroflexi	unclassified_Chloroflexi	unclassified_Chloroflexi
ASV_970	0	0	0	0	0	0	0	0	0	0	7	0	0	6	0	0	0	0	0	0	0	0	0	0	0	6	0	0	0	Bacteria	Actinobacteria	Actinobacteria	Gaiellales	Gaiellaceae	Gaiella
ASV_972	0	0	0	0	0	0	0	0	0	0	0	0	0	0	0	0	0	0	0	0	0	0	0	0	0	0	0	0	0	Bacteria	Actinobacteria	Actinobacteria	Acidimicrobiales	Acidimicrobiaceae	Ilumatobacter
ASV_975	0	0	0	0	0	0	0	0	0	0	0	0	6	3	10	0	0	0	0	0	0	0	0	0	0	0	0	0	0	Bacteria	Proteobacteria	Alphaproteobacteria	Rhodobacterales	Rhodobacteraceae	Paracoccus
ASV_976	0	0	0	0	0	0	0	0	0	0	0	0	0	11	0	0	0	0	0	0	0	0	0	0	0	8	0	0	0	Bacteria	Chloroflexi	Thermomicrobia	Sphaerobacterales	Sphaerobacteraceae	unclassified_Sphaerobacteraceae
ASV_978	0	0	0	0	0	0	0	0	0	0	0	0	0	0	19	0	0	0	0	0	0	0	0	0	0	0	0	0	0	Bacteria	Actinobacteria	Actinobacteria	Actinomycetales	Nakamurellaceae	Nakamurella
ASV_979	0	0	0	0	0	0	0	0	0	0	0	0	0	0	19	0	0	0	0	0	0	0	0	0	0	0	0	0	0	Bacteria	Bacteroidetes	Cytophagia	Cytophagales	Cytophagaceae	Hymenobacter
ASV_980	0	0	0	0	0	0	0	0	0	0	0	0	0	0	19	0	0	0	0	0	0	0	0	0	0	0	0	0	0	Bacteria	Proteobacteria	Betaproteobacteria	Burkholderiales	Oxalobacteraceae	Massilia
ASV_981	0	0	0	0	0	0	0	0	0	0	0	0	0	0	0	19	0	0	0	0	0	0	0	0	0	0	0	0	0	Bacteria	Chloroflexi	unclassified_Chloroflexi	unclassified_Chloroflexi	unclassified_Chloroflexi	unclassified_Chloroflexi
ASV_982	0	0	0	0	0	0	0	0	0	0	0	0	0	0	0	11	0	2	0	5	1	0	0	0	0	0	0	0	0	Bacteria	Chloroflexi	unclassified_Chloroflexi	unclassified_Chloroflexi	unclassified_Chloroflexi	unclassified_Chloroflexi
ASV_983	0	0	0	0	0	0	0	0	0	0	0	0	0	0	0	0	2	0	0	5	3	6	0	0	0	3	0	0	0	Bacteria	Verrucomicrobia	Spartobacteria	Spartobacteria_genera_incertae_sedis	Spartobacteria_genera_incertae_sedis	Spartobacteria_genera_incertae_sedis
ASV_984	0	0	0	0	0	0	0	0	0	0	0	0	0	0	0	0	2	0	0	0	3	0	4	0	3	0	5	2	0	Bacteria	unclassified_Bacteria	unclassified_Bacteria	unclassified_Bacteria	unclassified_Bacteria	unclassified_Bacteria
ASV_985	0	0	0	0	0	0	0	0	0	0	0	0	0	0	0	0	0	0	0	0	2	2	0	0	0	5	3	5	2	Bacteria	Proteobacteria	Alphaproteobacteria	Sphingomonadales	Sphingomonadaceae	Sphingomonas
ASV_986	0	0	0	0	0	0	0	0	0	0	0	0	0	0	0	0	0	0	0	0	0	0	0	0	19	0	0	0	0	Bacteria	Actinobacteria	Actinobacteria	Actinomycetales	Streptosporangiaceae	Sphaerisporangium
ASV_987	0	0	0	0	0	0	0	0	0	0	0	0	0	0	0	0	0	0	0	0	0	0	0	0	0	19	0	0	0	Bacteria	Planctomycetes	Planctomycetia	Planctomycetales	Planctomycetaceae	Singulisphaera
ASV_988	0	0	0	0	0	0	0	0	0	0	0	0	0	0	0	0	0	0	0	0	0	0	0	0	0	0	0	19	0	Bacteria	Proteobacteria	Betaproteobacteria	Burkholderiales	unclassified_Burkholderiales	unclassified_Burkholderiales
ASV_989	0	0	0	0	0	0	0	0	0	0	0	0	0	0	0	0	0	0	0	0	0	0	0	0	0	0	0	0	19	Bacteria	Actinobacteria	Actinobacteria	Actinomycetales	Micromonosporaceae	unclassified_Micromonosporaceae
ASV_990	2	0	0	0	0	0	0	0	0	0	0	0	0	0	0	0	0	0	0	0	0	0	16	0	0	0	0	0	0	Bacteria	Actinobacteria	Actinobacteria	Actinomycetales	Pseudonocardiaceae	Actinomycetospora
ASV_991	0	0	0	18	0	0	0	0	0	0	0	0	0	0	0	0	0	0	0	0	0	0	0	0	0	0	0	0	0	Bacteria	Bacteroidetes	Sphingobacteriia	Sphingobacteriales	Sphingobacteriaceae	unclassified_Sphingobacteriaceae
ASV_992	0	0	0	0	0	18	0	0	0	0	0	0	0	0	0	0	0	0	0	0	0	0	0	0	0	0	0	0	0	Bacteria	Proteobacteria	Betaproteobacteria	Burkholderiales	Oxalobacteraceae	Janthinobacterium
ASV_995	0	0	0	0	0	0	0	0	0	0	0	18	0	0	0	0	0	0	0	0	0	0	0	0	0	0	0	0	0	Bacteria	Actinobacteria	Actinobacteria	Actinomycetales	Corynebacteriaceae	Corynebacterium
ASV_998	0	0	0	0	0	0	0	0	0	0	0	0	0	0	0	0	0	0	0	0	0	0	0	0	0	0	0	0	0	Bacteria	Chloroflexi	Thermomicrobia	Sphaerobacterales	Sphaerobacteraceae	unclassified_Sphaerobacteraceae
ASV_999	0	0	0	0	0	0	0	0	0	0	0	0	0	0	0	0	0	0	0	0	0	0	0	0	0	0	0	0	0	Bacteria	unclassified_Bacteria	unclassified_Bacteria	unclassified_Bacteria	unclassified_Bacteria	unclassified_Bacteria
ASV_1003	0	0	0	0	0	0	0	0	0	0	0	0	0	0	0	0	4	0	0	8	0	5	0	0	0	0	0	0	1	Bacteria	Candidatus Saccharibacteria	Saccharibacteria_genera_incertae_sedis	Saccharibacteria_genera_incertae_sedis	Saccharibacteria_genera_incertae_sedis	Saccharibacteria_genera_incertae_sedis
ASV_1004	0	0	0	0	0	0	0	0	0	0	0	0	0	0	0	0	0	0	0	0	0	0	18	0	0	0	0	0	0	Bacteria	Bacteroidetes	Sphingobacteriia	Sphingobacteriales	Sphingobacteriaceae	Pedobacter
ASV_1005	0	0	0	0	0	0	0	0	0	0	0	0	0	0	0	0	0	0	0	0	0	0	0	0	0	18	0	0	0	Bacteria	Verrucomicrobia	Verrucomicrobiae	Verrucomicrobiales	Verrucomicrobiaceae	Luteolibacter
ASV_1006	0	0	0	0	0	0	0	0	0	0	0	0	0	0	0	0	0	0	0	0	0	0	0	0	0	18	0	0	0	Bacteria	Proteobacteria	Betaproteobacteria	Burkholderiales	Comamonadaceae	Acidovorax
ASV_1007	3	10	0	0	0	0	0	0	0	0	0	0	0	0	0	0	0	0	0	0	0	0	0	0	0	0	4	0	0	Bacteria	Bacteroidetes	Flavobacteriia	Flavobacteriales	Flavobacteriaceae	Chryseobacterium
ASV_1008	1	0	0	0	0	0	0	0	0	0	12	0	0	0	0	0	0	0	0	0	0	0	1	0	0	0	0	0	0	Bacteria	Proteobacteria	Alphaproteobacteria	Rhodospirillales	Rhodospirillaceae	Skermanella
ASV_1009	0	0	0	0	2	0	0	0	0	0	0	0	0	9	0	0	0	1	2	0	0	0	0	0	0	0	0	0	0	Bacteria	Actinobacteria	Actinobacteria	Acidimicrobiales	Iamiaceae	Aquihabitans
ASV_1010	0	0	0	0	0	17	0	0	0	0	0	0	0	0	0	0	0	0	0	0	0	0	0	0	0	0	0	0	0	Bacteria	Proteobacteria	unclassified_Proteobacteria	unclassified_Proteobacteria	unclassified_Proteobacteria	unclassified_Proteobacteria
ASV_1011	0	0	0	0	0	1	0	0	0	6	0	0	0	0	0	0	0	0	0	0	10	0	0	0	0	0	0	0	0	Bacteria	Actinobacteria	Actinobacteria	Solirubrobacterales	unclassified_Solirubrobacterales	unclassified_Solirubrobacterales
ASV_1014	0	0	0	0	0	0	0	0	0	0	0	0	0	0	0	0	0	0	0	0	0	0	0	0	0	0	0	0	0	Bacteria	Actinobacteria	Actinobacteria	Actinomycetales	Corynebacteriaceae	Corynebacterium
ASV_1018	0	0	0	0	0	0	0	0	0	17	0	0	0	0	0	0	0	0	0	0	0	0	0	0	0	0	0	0	0	Bacteria	Actinobacteria	Actinobacteria	Actinomycetales	Micromonosporaceae	Micromonospora
ASV_1019	0	0	0	0	0	0	0	0	0	17	0	0	0	0	0	0	0	0	0	0	0	0	0	0	0	0	0	0	0	Bacteria	Proteobacteria	Alphaproteobacteria	Sphingomonadales	Sphingomonadaceae	Sphingobium
ASV_1020	0	0	0	0	0	0	0	0	0	0	17	0	0	0	0	0	0	0	0	0	0	0	0	0	0	0	0	0	0	Bacteria	Bacteroidetes	Cytophagia	Cytophagales	Cytophagaceae	Hymenobacter
ASV_1021	0	0	0	0	0	0	0	0	0	0	0	3	0	13	0	0	1	0	0	0	0	0	0	0	0	0	0	0	0	Bacteria	Actinobacteria	Actinobacteria	Actinomycetales	Microbacteriaceae	unclassified_Microbacteriaceae
ASV_1023	0	0	0	0	0	0	0	0	0	0	0	0	0	0	0	0	0	0	0	0	0	0	0	0	0	0	0	0	0	Bacteria	Actinobacteria	Actinobacteria	Actinomycetales	Mycobacteriaceae	Mycobacterium
ASV_1026	0	0	0	0	0	0	0	0	0	0	0	0	0	0	17	0	0	0	0	0	0	0	0	0	0	0	0	0	0	Bacteria	Actinobacteria	Actinobacteria	Gaiellales	Gaiellaceae	Gaiella
ASV_1027	0	0	0	0	0	0	0	0	0	0	0	0	0	0	17	0	0	0	0	0	0	0	0	0	0	0	0	0	0	Bacteria	Actinobacteria	Actinobacteria	Gaiellales	Gaiellaceae	Gaiella
ASV_1029	0	0	0	0	0	0	0	0	0	0	0	0	0	0	0	17	0	0	0	0	0	0	0	0	0	0	0	0	0	Bacteria	Bacteroidetes	Cytophagia	Cytophagales	Cytophagaceae	Hymenobacter
ASV_1030	0	0	0	0	0	0	0	0	0	0	0	0	0	0	0	17	0	0	0	0	0	0	0	0	0	0	0	0	0	Bacteria	Actinobacteria	Actinobacteria	Actinomycetales	Nocardioidaceae	Kribbella
ASV_1031	0	0	0	0	0	0	0	0	0	0	0	0	0	0	0	0	7	4	0	1	1	3	1	0	0	0	0	0	0	Bacteria	Verrucomicrobia	Spartobacteria	Spartobacteria_genera_incertae_sedis	Spartobacteria_genera_incertae_sedis	Spartobacteria_genera_incertae_sedis
ASV_1032	0	0	0	0	0	0	0	0	0	0	0	0	0	0	0	0	3	0	0	5	0	2	7	0	0	0	0	0	0	Bacteria	Acidobacteria	Acidobacteria_Gp6	Gp6	Gp6	Gp6
ASV_1033	0	0	0	0	0	0	0	0	0	0	0	0	0	0	0	0	0	10	5	0	1	1	0	0	0	0	0	0	0	Bacteria	Actinobacteria	Actinobacteria	Solirubrobacterales	Patulibacteraceae	Patulibacter
ASV_1034	0	0	0	0	0	0	0	0	0	0	0	0	0	0	0	0	0	5	0	1	2	0	0	0	2	0	0	2	5	Bacteria	Acidobacteria	Acidobacteria_Gp1	Gp1	Gp1	Gp1
ASV_1035	0	0	0	0	0	0	0	0	0	0	0	0	0	0	0	0	0	3	0	0	8	0	0	0	0	6	0	0	0	Bacteria	Proteobacteria	Gammaproteobacteria	Xanthomonadales	Xanthomonadaceae	Stenotrophomonas
ASV_1036	0	0	0	0	0	0	0	0	0	0	0	0	0	0	0	0	0	0	17	0	0	0	0	0	0	0	0	0	0	Bacteria	Actinobacteria	Actinobacteria	Solirubrobacterales	Solirubrobacteraceae	Solirubrobacter
ASV_1037	0	0	0	0	0	0	0	0	0	0	0	0	0	0	0	0	0	0	0	8	4	2	0	0	0	3	0	0	0	Bacteria	Proteobacteria	Deltaproteobacteria	Bdellovibrionales	Bdellovibrionaceae	Bdellovibrio
ASV_1038	0	0	0	0	0	0	0	0	0	0	0	0	0	0	0	0	0	0	0	0	17	0	0	0	0	0	0	0	0	Bacteria	Proteobacteria	Betaproteobacteria	Burkholderiales	Oxalobacteraceae	Massilia
ASV_1039	0	0	0	0	0	0	0	0	0	0	0	0	0	0	0	0	0	0	0	0	0	0	17	0	0	0	0	0	0	Bacteria	Proteobacteria	Alphaproteobacteria	Rhizobiales	Xanthobacteraceae	Labrys
ASV_1040	0	0	0	0	0	0	0	0	0	0	0	0	0	0	0	0	0	0	0	0	0	0	17	0	0	0	0	0	0	Bacteria	Proteobacteria	Alphaproteobacteria	Rhizobiales	Rhizobiaceae	Rhizobium
ASV_1041	0	0	0	0	0	0	0	0	0	0	0	0	0	0	0	0	0	0	0	0	0	0	17	0	0	0	0	0	0	Bacteria	Actinobacteria	Actinobacteria	Actinomycetales	Glycomycetaceae	Glycomyces
ASV_1042	0	0	0	0	0	0	0	0	0	0	0	0	0	0	0	0	0	0	0	0	0	0	3	0	0	0	9	5	0	Bacteria	Actinobacteria	Actinobacteria	Solirubrobacterales	Solirubrobacteraceae	Solirubrobacter
ASV_1043	0	0	0	0	0	0	0	0	0	0	0	0	0	0	0	0	0	0	0	0	0	0	0	17	0	0	0	0	0	Bacteria	Actinobacteria	Actinobacteria	Actinomycetales	Microbacteriaceae	unclassified_Microbacteriaceae
ASV_1044	0	0	0	0	0	0	0	0	0	0	0	0	0	0	0	0	0	0	0	0	0	0	0	0	17	0	0	0	0	Bacteria	Actinobacteria	Actinobacteria	Actinomycetales	Thermomonosporaceae	Actinoallomurus
ASV_1045	0	0	0	0	0	0	0	0	0	0	0	0	0	0	0	0	0	0	0	0	0	0	0	0	0	0	17	0	0	Bacteria	Bacteroidetes	Cytophagia	Cytophagales	Cytophagaceae	Dyadobacter
ASV_1046	0	0	0	0	0	0	0	0	0	0	0	0	0	0	0	0	0	0	0	0	0	0	0	0	0	0	17	0	0	Bacteria	Proteobacteria	Betaproteobacteria	Burkholderiales	Oxalobacteraceae	unclassified_Oxalobacteraceae
ASV_1047	0	0	0	0	0	0	0	0	0	0	0	0	0	0	0	0	0	0	0	0	0	0	0	0	0	0	0	17	0	Bacteria	Actinobacteria	Actinobacteria	Acidimicrobiales	Acidimicrobiaceae	Ilumatobacter
ASV_1048	0	0	0	0	0	0	0	0	0	0	0	0	0	0	0	0	0	0	0	0	0	0	0	0	0	0	0	17	0	Bacteria	Proteobacteria	Alphaproteobacteria	Sphingomonadales	Sphingomonadaceae	unclassified_Sphingomonadaceae
ASV_1049	0	0	0	0	0	0	0	0	0	0	0	0	0	0	0	0	0	0	0	0	0	0	0	0	0	0	0	17	0	Bacteria	Actinobacteria	Actinobacteria	Actinomycetales	Micromonosporaceae	Micromonospora
ASV_1050	0	0	0	0	0	0	0	0	0	0	0	0	0	0	0	0	0	0	0	0	0	0	0	0	0	0	0	0	17	Bacteria	Actinobacteria	Actinobacteria	Actinomycetales	Nocardiaceae	Rhodococcus
ASV_1051	0	0	0	0	16	0	0	0	0	0	0	0	0	0	0	0	0	0	0	0	0	0	0	0	0	0	0	0	0	Bacteria	Proteobacteria	Gammaproteobacteria	Pseudomonadales	Pseudomonadaceae	Pseudomonas
ASV_1052	0	0	0	0	0	0	2	0	0	0	0	0	0	0	14	0	0	0	0	0	0	0	0	0	0	0	0	0	0	Bacteria	Actinobacteria	Actinobacteria	unclassified_Actinobacteria	unclassified_Actinobacteria	unclassified_Actinobacteria
ASV_1053	0	0	0	0	0	0	1	0	0	0	0	0	0	0	0	0	0	0	0	3	3	3	0	0	0	0	1	2	3	Bacteria	Firmicutes	Bacilli	Bacillales	Paenibacillaceae 1	Paenibacillus
ASV_1054	0	0	0	0	0	0	0	16	0	0	0	0	0	0	0	0	0	0	0	0	0	0	0	0	0	0	0	0	0	Bacteria	Actinobacteria	unclassified_Actinobacteria	unclassified_Actinobacteria	unclassified_Actinobacteria	unclassified_Actinobacteria
ASV_1055	0	0	0	0	0	0	0	0	0	0	0	0	0	0	0	0	0	0	0	0	0	0	0	0	0	0	0	0	0	Bacteria	Actinobacteria	Actinobacteria	unclassified_Actinobacteria	unclassified_Actinobacteria	unclassified_Actinobacteria
ASV_1059	0	0	0	0	0	0	0	0	16	0	0	0	0	0	0	0	0	0	0	0	0	0	0	0	0	0	0	0	0	Bacteria	Acidobacteria	Acidobacteria_Gp4	unclassified_Acidobacteria_Gp4	unclassified_Acidobacteria_Gp4	unclassified_Acidobacteria_Gp4
ASV_1061	0	0	0	0	0	0	0	0	0	16	0	0	0	0	0	0	0	0	0	0	0	0	0	0	0	0	0	0	0	Bacteria	Actinobacteria	Actinobacteria	Actinomycetales	Geodermatophilaceae	Modestobacter
ASV_1062	0	0	0	0	0	0	0	0	0	16	0	0	0	0	0	0	0	0	0	0	0	0	0	0	0	0	0	0	0	Bacteria	Actinobacteria	Actinobacteria	Actinomycetales	unclassified_Actinomycetales	unclassified_Actinomycetales
ASV_1063	0	0	0	0	0	0	0	0	0	16	0	0	0	0	0	0	0	0	0	0	0	0	0	0	0	0	0	0	0	Bacteria	Actinobacteria	Actinobacteria	Actinomycetales	Micrococcaceae	Arthrobacter
ASV_1064	0	0	0	0	0	0	0	0	0	16	0	0	0	0	0	0	0	0	0	0	0	0	0	0	0	0	0	0	0	Bacteria	Acidobacteria	Acidobacteria_Gp16	Gp16	Gp16	Gp16
ASV_1065	0	0	0	0	0	0	0	0	0	8	0	0	0	0	0	0	2	0	0	0	6	0	0	0	0	0	0	0	0	Bacteria	Firmicutes	Bacilli	Bacillales	Thermoactinomycetaceae 1	Thermoflavimicrobium
ASV_1067	0	0	0	0	0	0	0	0	0	0	0	16	0	0	0	0	0	0	0	0	0	0	0	0	0	0	0	0	0	Bacteria	Chloroflexi	Thermomicrobia	Sphaerobacterales	Sphaerobacteraceae	unclassified_Sphaerobacteraceae
ASV_1068	0	0	0	0	0	0	0	0	0	0	0	16	0	0	0	0	0	0	0	0	0	0	0	0	0	0	0	0	0	Bacteria	Proteobacteria	Alphaproteobacteria	Rhizobiales	Hyphomicrobiaceae	Hyphomicrobium
ASV_1070	0	0	0	0	0	0	0	0	0	0	0	0	0	0	0	0	0	0	0	0	0	0	0	0	0	0	0	0	0	Bacteria	Firmicutes	Bacilli	Bacillales	Bacillaceae 1	Bacillus
ASV_1071	0	0	0	0	0	0	0	0	0	0	0	0	0	0	16	0	0	0	0	0	0	0	0	0	0	0	0	0	0	Bacteria	Actinobacteria	Actinobacteria	Actinomycetales	Geodermatophilaceae	Blastococcus
ASV_1072	0	0	0	0	0	0	0	0	0	0	0	0	0	0	16	0	0	0	0	0	0	0	0	0	0	0	0	0	0	Bacteria	Proteobacteria	Betaproteobacteria	Burkholderiales	Burkholderiaceae	Burkholderia
ASV_1073	0	0	0	0	0	0	0	0	0	0	0	0	0	0	16	0	0	0	0	0	0	0	0	0	0	0	0	0	0	Bacteria	Firmicutes	Bacilli	Bacillales	Paenibacillaceae 1	Paenibacillus
ASV_1074	0	0	0	0	0	0	0	0	0	0	0	0	0	0	0	0	0	0	0	0	0	0	0	0	0	0	0	0	0	Bacteria	Acidobacteria	Acidobacteria_Gp16	Gp16	Gp16	Gp16
ASV_1075	0	0	0	0	0	0	0	0	0	0	0	0	0	0	0	0	0	0	0	0	0	0	0	0	0	0	0	0	0	Bacteria	Proteobacteria	unclassified_Proteobacteria	unclassified_Proteobacteria	unclassified_Proteobacteria	unclassified_Proteobacteria
ASV_1076	0	0	0	0	0	0	0	0	0	0	0	0	0	0	0	16	0	0	0	0	0	0	0	0	0	0	0	0	0	Bacteria	Actinobacteria	Actinobacteria	Actinomycetales	Micrococcaceae	Rothia
ASV_1077	0	0	0	0	0	0	0	0	0	0	0	0	0	0	0	16	0	0	0	0	0	0	0	0	0	0	0	0	0	Bacteria	Firmicutes	Clostridia	Clostridiales	Clostridiales_Incertae Sedis XI	Finegoldia
ASV_1078	0	0	0	0	0	0	0	0	0	0	0	0	0	0	0	16	0	0	0	0	0	0	0	0	0	0	0	0	0	Bacteria	Firmicutes	Bacilli	Bacillales	Bacillales_Incertae Sedis XI	Gemella
ASV_1079	0	0	0	0	0	0	0	0	0	0	0	0	0	0	0	0	5	0	0	4	0	0	0	0	0	0	4	3	0	Bacteria	Verrucomicrobia	Spartobacteria	Spartobacteria_genera_incertae_sedis	Spartobacteria_genera_incertae_sedis	Spartobacteria_genera_incertae_sedis
ASV_1080	0	0	0	0	0	0	0	0	0	0	0	0	0	0	0	0	2	1	0	5	5	0	0	0	1	0	0	2	0	Bacteria	Gemmatimonadetes	Gemmatimonadetes	Gemmatimonadales	Gemmatimonadaceae	Gemmatimonas
ASV_1082	0	0	0	0	0	0	0	0	0	0	0	0	0	0	0	0	0	0	0	3	0	0	0	1	2	0	0	7	3	Bacteria	Actinobacteria	Actinobacteria	unclassified_Actinobacteria	unclassified_Actinobacteria	unclassified_Actinobacteria
ASV_1083	0	0	0	0	0	0	0	0	0	0	0	0	0	0	0	0	0	0	0	1	0	4	2	0	0	9	0	0	0	Bacteria	Chloroflexi	unclassified_Chloroflexi	unclassified_Chloroflexi	unclassified_Chloroflexi	unclassified_Chloroflexi
ASV_1084	0	0	0	0	0	0	0	0	0	0	0	0	0	0	0	0	0	0	0	0	16	0	0	0	0	0	0	0	0	Bacteria	Proteobacteria	Betaproteobacteria	Burkholderiales	Comamonadaceae	unclassified_Comamonadaceae
ASV_1085	0	0	0	0	0	0	0	0	0	0	0	0	0	0	0	0	0	0	0	0	0	16	0	0	0	0	0	0	0	Bacteria	Proteobacteria	Betaproteobacteria	Burkholderiales	Comamonadaceae	Rhodoferax
ASV_1086	0	0	0	0	0	0	0	0	0	0	0	0	0	0	0	0	0	0	0	0	0	16	0	0	0	0	0	0	0	Bacteria	Proteobacteria	Betaproteobacteria	Burkholderiales	Oxalobacteraceae	unclassified_Oxalobacteraceae
ASV_1087	0	0	0	0	0	0	0	0	0	0	0	0	0	0	0	0	0	0	0	0	0	3	0	0	0	3	3	7	0	Bacteria	Proteobacteria	Deltaproteobacteria	Bdellovibrionales	Bdellovibrionaceae	Bdellovibrio
ASV_1088	0	0	0	0	0	0	0	0	0	0	0	0	0	0	0	0	0	0	0	0	0	0	16	0	0	0	0	0	0	Bacteria	Proteobacteria	Betaproteobacteria	Burkholderiales	Oxalobacteraceae	Duganella
ASV_1089	0	0	0	0	0	0	0	0	0	0	0	0	0	0	0	0	0	0	0	0	0	0	16	0	0	0	0	0	0	Bacteria	Proteobacteria	Alphaproteobacteria	Rhizobiales	Methylobacteriaceae	Microvirga
ASV_1090	0	0	0	0	0	0	0	0	0	0	0	0	0	0	0	0	0	0	0	0	0	0	0	3	0	4	0	0	9	Bacteria	Actinobacteria	Actinobacteria	Acidimicrobiales	Acidimicrobiaceae	Ilumatobacter
ASV_1091	0	0	0	0	0	0	0	0	0	0	0	0	0	0	0	0	0	0	0	0	0	0	0	0	0	0	0	16	0	Bacteria	Proteobacteria	Betaproteobacteria	Burkholderiales	Comamonadaceae	Acidovorax
ASV_1092	0	0	0	0	0	0	0	0	0	0	0	0	0	0	0	0	0	0	0	0	0	0	0	0	0	0	0	16	0	Bacteria	Candidatus Saccharibacteria	Saccharibacteria_genera_incertae_sedis	Saccharibacteria_genera_incertae_sedis	Saccharibacteria_genera_incertae_sedis	Saccharibacteria_genera_incertae_sedis
ASV_1093	0	15	0	0	0	0	0	0	0	0	0	0	0	0	0	0	0	0	0	0	0	0	0	0	0	0	0	0	0	Bacteria	Bacteroidetes	Flavobacteriia	Flavobacteriales	Flavobacteriaceae	Chryseobacterium
ASV_1094	0	0	3	0	0	0	0	0	0	0	0	0	0	0	0	0	0	0	0	2	3	0	0	0	0	2	0	3	2	Bacteria	Actinobacteria	Actinobacteria	Gaiellales	Gaiellaceae	Gaiella
ASV_1095	0	0	0	0	0	0	0	15	0	0	0	0	0	0	0	0	0	0	0	0	0	0	0	0	0	0	0	0	0	Bacteria	Actinobacteria	Actinobacteria	Solirubrobacterales	Solirubrobacteraceae	Solirubrobacter
ASV_1098	0	0	0	0	0	0	0	15	0	0	0	0	0	0	0	0	0	0	0	0	0	0	0	0	0	0	0	0	0	Bacteria	Actinobacteria	Actinobacteria	Rubrobacterales	Rubrobacteraceae	Rubrobacter
ASV_1099	0	0	0	0	0	0	0	15	0	0	0	0	0	0	0	0	0	0	0	0	0	0	0	0	0	0	0	0	0	Bacteria	Actinobacteria	Actinobacteria	Actinomycetales	unclassified_Actinomycetales	unclassified_Actinomycetales
ASV_1102	0	0	0	0	0	0	0	0	0	15	0	0	0	0	0	0	0	0	0	0	0	0	0	0	0	0	0	0	0	Bacteria	Bacteroidetes	Cytophagia	Cytophagales	Cytophagaceae	Hymenobacter
ASV_1103	0	0	0	0	0	0	0	0	0	0	15	0	0	0	0	0	0	0	0	0	0	0	0	0	0	0	0	0	0	Bacteria	Actinobacteria	Actinobacteria	Actinomycetales	unclassified_Actinomycetales	unclassified_Actinomycetales
ASV_1110	0	0	0	0	0	0	0	0	0	0	0	0	0	0	0	0	0	0	0	0	0	0	0	0	0	0	0	0	0	Bacteria	Bacteroidetes	Cytophagia	Cytophagales	Cytophagaceae	Hymenobacter
ASV_1111	0	0	0	0	0	0	0	0	0	0	0	0	0	0	0	0	0	0	0	0	0	0	0	0	0	0	0	0	0	Bacteria	Chloroflexi	Thermomicrobia	Sphaerobacterales	Sphaerobacteraceae	unclassified_Sphaerobacteraceae
ASV_1112	0	0	0	0	0	0	0	0	0	0	0	0	0	0	15	0	0	0	0	0	0	0	0	0	0	0	0	0	0	Bacteria	Bacteroidetes	Cytophagia	Cytophagales	Cytophagaceae	Hymenobacter
ASV_1114	0	0	0	0	0	0	0	0	0	0	0	0	0	0	15	0	0	0	0	0	0	0	0	0	0	0	0	0	0	Bacteria	Actinobacteria	Actinobacteria	Actinomycetales	Nocardiaceae	Nocardia
ASV_1115	0	0	0	0	0	0	0	0	0	0	0	0	0	0	15	0	0	0	0	0	0	0	0	0	0	0	0	0	0	Bacteria	Actinobacteria	Actinobacteria	Acidimicrobiales	unclassified_Acidimicrobiales	unclassified_Acidimicrobiales
ASV_1116	0	0	0	0	0	0	0	0	0	0	0	0	0	0	0	0	0	0	0	0	0	0	0	0	0	0	0	0	0	Bacteria	Actinobacteria	Actinobacteria	Actinomycetales	Micromonosporaceae	Micromonospora
ASV_1117	0	0	0	0	0	0	0	0	0	0	0	0	0	0	0	15	0	0	0	0	0	0	0	0	0	0	0	0	0	Bacteria	Actinobacteria	Actinobacteria	Actinomycetales	Corynebacteriaceae	Corynebacterium
ASV_1118	0	0	0	0	0	0	0	0	0	0	0	0	0	0	0	0	15	0	0	0	0	0	0	0	0	0	0	0	0	Bacteria	Proteobacteria	Betaproteobacteria	Burkholderiales	Comamonadaceae	unclassified_Comamonadaceae
ASV_1119	0	0	0	0	0	0	0	0	0	0	0	0	0	0	0	0	15	0	0	0	0	0	0	0	0	0	0	0	0	Bacteria	Actinobacteria	Actinobacteria	Actinomycetales	Corynebacteriaceae	Corynebacterium
ASV_1120	0	0	0	0	0	0	0	0	0	0	0	0	0	0	0	0	0	3	0	0	0	5	0	0	0	0	0	0	7	Bacteria	Actinobacteria	Actinobacteria	Solirubrobacterales	Patulibacteraceae	Patulibacter
ASV_1121	0	0	0	0	0	0	0	0	0	0	0	0	0	0	0	0	0	0	0	0	6	9	0	0	0	0	0	0	0	Bacteria	Proteobacteria	Betaproteobacteria	Burkholderiales	Comamonadaceae	unclassified_Comamonadaceae
ASV_1122	0	0	0	0	0	0	0	0	0	0	0	0	0	0	0	0	0	0	0	0	0	15	0	0	0	0	0	0	0	Bacteria	Proteobacteria	Alphaproteobacteria	Rhizobiales	Hyphomicrobiaceae	Devosia
ASV_1123	0	0	0	0	0	0	0	0	0	0	0	0	0	0	0	0	0	0	0	0	0	0	15	0	0	0	0	0	0	Bacteria	Proteobacteria	Betaproteobacteria	Burkholderiales	Oxalobacteraceae	Duganella
ASV_1124	0	0	0	0	0	0	0	0	0	0	0	0	0	0	0	0	0	0	0	0	0	0	0	0	0	4	6	0	5	Bacteria	Actinobacteria	Actinobacteria	unclassified_Actinobacteria	unclassified_Actinobacteria	unclassified_Actinobacteria
ASV_1125	0	0	0	0	0	0	0	0	0	0	0	0	0	0	0	0	0	0	0	0	0	0	0	0	0	0	0	15	0	Bacteria	Bacteroidetes	Flavobacteriia	Flavobacteriales	Flavobacteriaceae	Chryseobacterium
ASV_1126	3	5	0	1	0	2	0	0	0	0	0	0	0	0	0	0	0	0	0	0	0	0	0	0	0	0	0	0	3	Bacteria	Bacteroidetes	Sphingobacteriia	Sphingobacteriales	Sphingobacteriaceae	Pedobacter
ASV_1127	1	0	0	0	0	0	0	0	0	0	0	0	0	0	0	0	0	0	0	6	3	0	0	0	0	0	0	0	0	Bacteria	Actinobacteria	Actinobacteria	unclassified_Actinobacteria	unclassified_Actinobacteria	unclassified_Actinobacteria
ASV_1128	0	4	0	4	0	1	0	0	0	0	0	0	0	0	0	5	0	0	0	0	0	0	0	0	0	0	0	0	0	Bacteria	Bacteroidetes	Cytophagia	Cytophagales	Cytophagaceae	Hymenobacter
ASV_1129	0	0	0	14	0	0	0	0	0	0	0	0	0	0	0	0	0	0	0	0	0	0	0	0	0	0	0	0	0	Bacteria	Proteobacteria	Gammaproteobacteria	unclassified_Gammaproteobacteria	unclassified_Gammaproteobacteria	unclassified_Gammaproteobacteria
ASV_1130	0	0	0	0	14	0	0	0	0	0	0	0	0	0	0	0	0	0	0	0	0	0	0	0	0	0	0	0	0	Bacteria	Bacteroidetes	Flavobacteriia	Flavobacteriales	Flavobacteriaceae	Flavobacterium
ASV_1131	0	0	0	0	0	14	0	0	0	0	0	0	0	0	0	0	0	0	0	0	0	0	0	0	0	0	0	0	0	Bacteria	Firmicutes	Bacilli	Bacillales	Paenibacillaceae 1	Paenibacillus
ASV_1132	0	0	0	0	0	0	0	14	0	0	0	0	0	0	0	0	0	0	0	0	0	0	0	0	0	0	0	0	0	Bacteria	unclassified_Bacteria	unclassified_Bacteria	unclassified_Bacteria	unclassified_Bacteria	unclassified_Bacteria
ASV_1133	0	0	0	0	0	0	0	14	0	0	0	0	0	0	0	0	0	0	0	0	0	0	0	0	0	0	0	0	0	Bacteria	Actinobacteria	unclassified_Actinobacteria	unclassified_Actinobacteria	unclassified_Actinobacteria	unclassified_Actinobacteria
ASV_1134	0	0	0	0	0	0	0	4	0	0	0	0	0	0	0	7	0	0	0	0	0	0	2	0	0	1	0	0	0	Bacteria	Actinobacteria	Actinobacteria	unclassified_Actinobacteria	unclassified_Actinobacteria	unclassified_Actinobacteria
ASV_1135	0	0	0	0	0	0	0	0	0	0	0	0	0	0	0	0	0	0	0	0	0	0	0	0	0	0	0	0	0	Bacteria	Acidobacteria	Acidobacteria_Gp3	Gp3	Gp3	Gp3
ASV_1136	0	0	0	0	0	0	0	0	14	0	0	0	0	0	0	0	0	0	0	0	0	0	0	0	0	0	0	0	0	Bacteria	Actinobacteria	Actinobacteria	Actinomycetales	Actinomycetaceae	Actinomyces
ASV_1137	0	0	0	0	0	0	0	0	0	14	0	0	0	0	0	0	0	0	0	0	0	0	0	0	0	0	0	0	0	Bacteria	Actinobacteria	Actinobacteria	Actinomycetales	Propionibacteriaceae	Microlunatus
ASV_1138	0	0	0	0	0	0	0	0	0	0	14	0	0	0	0	0	0	0	0	0	0	0	0	0	0	0	0	0	0	Bacteria	Proteobacteria	Betaproteobacteria	Burkholderiales	Oxalobacteraceae	Massilia
ASV_1139	0	0	0	0	0	0	0	0	0	0	0	14	0	0	0	0	0	0	0	0	0	0	0	0	0	0	0	0	0	Bacteria	Firmicutes	Bacilli	Bacillales	Bacillaceae 1	Bacillus
ASV_1140	0	0	0	0	0	0	0	0	0	0	0	14	0	0	0	0	0	0	0	0	0	0	0	0	0	0	0	0	0	Bacteria	Acidobacteria	Acidobacteria_Gp3	Gp3	Gp3	Gp3
ASV_1142	0	0	0	0	0	0	0	0	0	0	0	0	0	0	0	0	0	0	0	0	0	0	0	0	0	0	0	0	0	Bacteria	Firmicutes	Clostridia	Clostridiales	Clostridiaceae 1	Clostridium sensu stricto
ASV_1143	0	0	0	0	0	0	0	0	0	0	0	0	0	14	0	0	0	0	0	0	0	0	0	0	0	0	0	0	0	Bacteria	Actinobacteria	Actinobacteria	Actinomycetales	Micromonosporaceae	Planosporangium
ASV_1145	0	0	0	0	0	0	0	0	0	0	0	0	0	0	0	0	0	0	0	0	0	0	0	0	0	0	0	0	0	Bacteria	Actinobacteria	Actinobacteria	Actinomycetales	Geodermatophilaceae	Blastococcus
ASV_1146	0	0	0	0	0	0	0	0	0	0	0	0	0	0	0	0	0	0	0	0	0	0	0	0	0	0	0	0	0	Bacteria	Deinococcus-Thermus	Deinococci	Thermales	Thermaceae	Thermus
ASV_1147	0	0	0	0	0	0	0	0	0	0	0	0	0	0	14	0	0	0	0	0	0	0	0	0	0	0	0	0	0	Bacteria	Firmicutes	Clostridia	Clostridiales	unclassified_Clostridiales	unclassified_Clostridiales
ASV_1148	0	0	0	0	0	0	0	0	0	0	0	0	0	0	14	0	0	0	0	0	0	0	0	0	0	0	0	0	0	Bacteria	Actinobacteria	Actinobacteria	Gaiellales	Gaiellaceae	Gaiella
ASV_1149	0	0	0	0	0	0	0	0	0	0	0	0	0	0	14	0	0	0	0	0	0	0	0	0	0	0	0	0	0	Bacteria	Actinobacteria	Actinobacteria	Actinomycetales	Nocardioidaceae	Nocardioides
ASV_1150	0	0	0	0	0	0	0	0	0	0	0	0	0	0	14	0	0	0	0	0	0	0	0	0	0	0	0	0	0	Bacteria	Proteobacteria	Alphaproteobacteria	Rhizobiales	unclassified_Rhizobiales	unclassified_Rhizobiales
ASV_1151	0	0	0	0	0	0	0	0	0	0	0	0	0	0	0	0	0	0	0	0	0	0	0	0	0	0	0	0	0	Bacteria	Actinobacteria	Actinobacteria	Solirubrobacterales	Conexibacteraceae	Conexibacter
ASV_1152	0	0	0	0	0	0	0	0	0	0	0	0	0	0	0	14	0	0	0	0	0	0	0	0	0	0	0	0	0	Bacteria	Actinobacteria	Actinobacteria	Actinomycetales	Nocardioidaceae	Nocardioides
ASV_1153	0	0	0	0	0	0	0	0	0	0	0	0	0	0	0	0	3	3	0	0	1	0	6	0	1	0	0	0	0	Bacteria	Proteobacteria	Betaproteobacteria	Burkholderiales	Comamonadaceae	unclassified_Comamonadaceae
ASV_1154	0	0	0	0	0	0	0	0	0	0	0	0	0	0	0	0	0	0	0	0	14	0	0	0	0	0	0	0	0	Bacteria	Firmicutes	Clostridia	Clostridiales	Clostridiaceae 1	Clostridium sensu stricto
ASV_1155	0	0	0	0	0	0	0	0	0	0	0	0	0	0	0	0	0	0	0	0	14	0	0	0	0	0	0	0	0	Bacteria	Proteobacteria	Gammaproteobacteria	Xanthomonadales	Xanthomonadaceae	Arenimonas
ASV_1156	0	0	0	0	0	0	0	0	0	0	0	0	0	0	0	0	0	0	0	0	1	0	0	0	0	8	1	3	1	Bacteria	Proteobacteria	Gammaproteobacteria	Xanthomonadales	Xanthomonadaceae	unclassified_Xanthomonadaceae
ASV_1157	0	0	0	0	0	0	0	0	0	0	0	0	0	0	0	0	0	0	0	0	0	8	0	0	0	0	6	0	0	Bacteria	Bacteroidetes	Cytophagia	Cytophagales	Cytophagaceae	Dyadobacter
ASV_1158	0	0	0	0	0	0	0	0	0	0	0	0	0	0	0	0	0	0	0	0	0	0	14	0	0	0	0	0	0	Bacteria	Proteobacteria	Alphaproteobacteria	Sphingomonadales	Sphingomonadaceae	Sphingomonas
ASV_1159	0	0	0	0	0	0	0	0	0	0	0	0	0	0	0	0	0	0	0	0	0	0	14	0	0	0	0	0	0	Bacteria	Proteobacteria	Alphaproteobacteria	Rhizobiales	Phyllobacteriaceae	unclassified_Phyllobacteriaceae
ASV_1160	0	0	0	0	0	0	0	0	0	0	0	0	0	0	0	0	0	0	0	0	0	0	14	0	0	0	0	0	0	Bacteria	Proteobacteria	Alphaproteobacteria	Caulobacterales	Caulobacteraceae	Phenylobacterium
ASV_1161	0	0	0	0	0	0	0	0	0	0	0	0	0	0	0	0	0	0	0	0	0	0	0	5	1	4	2	2	0	Bacteria	Actinobacteria	Actinobacteria	Solirubrobacterales	Conexibacteraceae	Conexibacter
ASV_1163	0	0	0	0	0	0	0	0	0	0	0	0	0	0	0	0	0	0	0	0	0	0	0	0	0	0	8	0	6	Bacteria	Verrucomicrobia	Verrucomicrobiae	Verrucomicrobiales	Verrucomicrobiaceae	Luteolibacter
ASV_1164	0	0	0	0	0	0	0	0	0	0	0	0	0	0	0	0	0	0	0	0	0	0	0	0	0	0	0	14	0	Bacteria	Proteobacteria	Alphaproteobacteria	Sphingomonadales	Sphingomonadaceae	Novosphingobium
ASV_1165	0	0	0	0	0	0	0	0	0	0	0	0	0	0	0	0	0	0	0	0	0	0	0	0	0	0	0	0	14	Bacteria	Bacteroidetes	Sphingobacteriia	Sphingobacteriales	Sphingobacteriaceae	Pedobacter
ASV_1166	0	0	0	0	2	0	0	0	0	0	0	0	0	0	0	0	0	0	2	0	0	0	7	0	2	0	0	0	0	Bacteria	Actinobacteria	Actinobacteria	Rubrobacterales	Rubrobacteraceae	Rubrobacter
ASV_1169	0	0	0	0	0	0	0	13	0	0	0	0	0	0	0	0	0	0	0	0	0	0	0	0	0	0	0	0	0	Bacteria	Bacteroidetes	Cytophagia	Cytophagales	Cytophagaceae	Hymenobacter
ASV_1171	0	0	0	0	0	0	0	0	0	0	0	0	0	0	0	0	0	0	0	0	0	0	0	0	0	0	0	0	0	Bacteria	Actinobacteria	Actinobacteria	Actinomycetales	Dermabacteraceae	Brachybacterium
ASV_1173	0	0	0	0	0	0	0	0	0	13	0	0	0	0	0	0	0	0	0	0	0	0	0	0	0	0	0	0	0	Bacteria	Firmicutes	Bacilli	Bacillales	Bacillaceae 1	Bacillus
ASV_1174	0	0	0	0	0	0	0	0	0	13	0	0	0	0	0	0	0	0	0	0	0	0	0	0	0	0	0	0	0	Bacteria	Actinobacteria	Actinobacteria	Actinomycetales	unclassified_Actinomycetales	unclassified_Actinomycetales
ASV_1175	0	0	0	0	0	0	0	0	0	0	13	0	0	0	0	0	0	0	0	0	0	0	0	0	0	0	0	0	0	Bacteria	Actinobacteria	Actinobacteria	Actinomycetales	Micromonosporaceae	Actinoplanes
ASV_1176	0	0	0	0	0	0	0	0	0	0	13	0	0	0	0	0	0	0	0	0	0	0	0	0	0	0	0	0	0	Bacteria	unclassified_Bacteria	unclassified_Bacteria	unclassified_Bacteria	unclassified_Bacteria	unclassified_Bacteria
ASV_1177	0	0	0	0	0	0	0	0	0	0	13	0	0	0	0	0	0	0	0	0	0	0	0	0	0	0	0	0	0	Bacteria	Actinobacteria	Actinobacteria	Actinomycetales	Micrococcaceae	Kocuria
ASV_1178	0	0	0	0	0	0	0	0	0	0	0	13	0	0	0	0	0	0	0	0	0	0	0	0	0	0	0	0	0	Bacteria	Chloroflexi	Thermomicrobia	Sphaerobacterales	Sphaerobacteraceae	unclassified_Sphaerobacteraceae
ASV_1179	0	0	0	0	0	0	0	0	0	0	0	7	0	0	0	0	0	0	0	0	0	0	0	0	0	0	0	0	0	Bacteria	Bacteroidetes	Bacteroidia	Bacteroidales	Prevotellaceae	Prevotella
ASV_1181	0	0	0	0	0	0	0	0	0	0	0	0	0	0	0	0	0	0	0	0	0	0	0	0	0	0	0	0	0	Bacteria	Actinobacteria	Actinobacteria	Actinomycetales	Corynebacteriaceae	Corynebacterium
ASV_1185	0	0	0	0	0	0	0	0	0	0	0	0	0	13	0	0	0	0	0	0	0	0	0	0	0	0	0	0	0	Bacteria	Actinobacteria	Actinobacteria	Actinomycetales	Micromonosporaceae	unclassified_Micromonosporaceae
ASV_1187	0	0	0	0	0	0	0	0	0	0	0	0	0	13	0	0	0	0	0	0	0	0	0	0	0	0	0	0	0	Bacteria	Proteobacteria	Alphaproteobacteria	Rhizobiales	Hyphomicrobiaceae	Devosia
ASV_1188	0	0	0	0	0	0	0	0	0	0	0	0	0	11	0	0	1	0	0	0	0	0	0	0	0	1	0	0	0	Bacteria	Actinobacteria	Actinobacteria	Actinomycetales	Microbacteriaceae	unclassified_Microbacteriaceae
ASV_1194	0	0	0	0	0	0	0	0	0	0	0	0	0	0	0	0	0	0	0	0	0	0	0	0	0	0	0	0	0	Bacteria	Actinobacteria	Actinobacteria	Actinomycetales	Propionibacteriaceae	Microlunatus
ASV_1195	0	0	0	0	0	0	0	0	0	0	0	0	0	0	13	0	0	0	0	0	0	0	0	0	0	0	0	0	0	Bacteria	Actinobacteria	Actinobacteria	Actinomycetales	Propionibacteriaceae	unclassified_Propionibacteriaceae
ASV_1196	0	0	0	0	0	0	0	0	0	0	0	0	0	0	13	0	0	0	0	0	0	0	0	0	0	0	0	0	0	Bacteria	Bacteroidetes	Sphingobacteriia	Sphingobacteriales	Sphingobacteriaceae	Pedobacter
ASV_1197	0	0	0	0	0	0	0	0	0	0	0	0	0	0	13	0	0	0	0	0	0	0	0	0	0	0	0	0	0	Bacteria	Proteobacteria	Gammaproteobacteria	Xanthomonadales	Xanthomonadaceae	Lysobacter
ASV_1198	0	0	0	0	0	0	0	0	0	0	0	0	0	0	13	0	0	0	0	0	0	0	0	0	0	0	0	0	0	Bacteria	Gemmatimonadetes	Gemmatimonadetes	Gemmatimonadales	Gemmatimonadaceae	Gemmatimonas
ASV_1199	0	0	0	0	0	0	0	0	0	0	0	0	0	0	13	0	0	0	0	0	0	0	0	0	0	0	0	0	0	Bacteria	Proteobacteria	Gammaproteobacteria	Aeromonadales	Aeromonadaceae	Aeromonas
ASV_1200	0	0	0	0	0	0	0	0	0	0	0	0	0	0	13	0	0	0	0	0	0	0	0	0	0	0	0	0	0	Bacteria	Verrucomicrobia	Spartobacteria	Spartobacteria_genera_incertae_sedis	Spartobacteria_genera_incertae_sedis	Spartobacteria_genera_incertae_sedis
ASV_1201	0	0	0	0	0	0	0	0	0	0	0	0	0	0	0	0	0	0	0	0	0	0	0	0	0	0	0	0	0	Bacteria	Proteobacteria	Alphaproteobacteria	Caulobacterales	Caulobacteraceae	Brevundimonas
ASV_1202	0	0	0	0	0	0	0	0	0	0	0	0	0	0	0	0	0	0	0	0	0	0	0	0	0	0	0	0	0	Bacteria	Actinobacteria	Actinobacteria	Actinomycetales	unclassified_Actinomycetales	unclassified_Actinomycetales
ASV_1203	0	0	0	0	0	0	0	0	0	0	0	0	0	0	0	0	0	0	0	0	0	0	0	0	0	0	0	0	0	Bacteria	unclassified_Bacteria	unclassified_Bacteria	unclassified_Bacteria	unclassified_Bacteria	unclassified_Bacteria
ASV_1204	0	0	0	0	0	0	0	0	0	0	0	0	0	0	0	13	0	0	0	0	0	0	0	0	0	0	0	0	0	Bacteria	Proteobacteria	Gammaproteobacteria	Pseudomonadales	Moraxellaceae	Enhydrobacter
ASV_1205	0	0	0	0	0	0	0	0	0	0	0	0	0	0	0	13	0	0	0	0	0	0	0	0	0	0	0	0	0	Bacteria	Firmicutes	Bacilli	Bacillales	unclassified_Bacillales	unclassified_Bacillales
ASV_1206	0	0	0	0	0	0	0	0	0	0	0	0	0	0	0	0	13	0	0	0	0	0	0	0	0	0	0	0	0	Bacteria	Proteobacteria	Alphaproteobacteria	Rhizobiales	Xanthobacteraceae	Labrys
ASV_1207	0	0	0	0	0	0	0	0	0	0	0	0	0	0	0	0	4	0	0	0	4	0	0	0	0	0	0	2	3	Bacteria	Actinobacteria	Actinobacteria	unclassified_Actinobacteria	unclassified_Actinobacteria	unclassified_Actinobacteria
ASV_1208	0	0	0	0	0	0	0	0	0	0	0	0	0	0	0	0	0	13	0	0	0	0	0	0	0	0	0	0	0	Bacteria	Bacteroidetes	Sphingobacteriia	Sphingobacteriales	Chitinophagaceae	Taibaiella
ASV_1209	0	0	0	0	0	0	0	0	0	0	0	0	0	0	0	0	0	0	13	0	0	0	0	0	0	0	0	0	0	Bacteria	Actinobacteria	Actinobacteria	Actinomycetales	Pseudonocardiaceae	Amycolatopsis
ASV_1210	0	0	0	0	0	0	0	0	0	0	0	0	0	0	0	0	0	0	0	13	0	0	0	0	0	0	0	0	0	Bacteria	Proteobacteria	Betaproteobacteria	Burkholderiales	Oxalobacteraceae	Massilia
ASV_1211	0	0	0	0	0	0	0	0	0	0	0	0	0	0	0	0	0	0	0	0	0	13	0	0	0	0	0	0	0	Bacteria	Actinobacteria	Actinobacteria	Actinomycetales	unclassified_Actinomycetales	unclassified_Actinomycetales
ASV_1212	0	0	0	0	0	0	0	0	0	0	0	0	0	0	0	0	0	0	0	0	0	5	3	0	0	2	0	3	0	Bacteria	Proteobacteria	Alphaproteobacteria	Caulobacterales	Caulobacteraceae	Asticcacaulis
ASV_1213	0	0	0	0	0	0	0	0	0	0	0	0	0	0	0	0	0	0	0	0	0	0	13	0	0	0	0	0	0	Bacteria	Actinobacteria	Actinobacteria	Solirubrobacterales	Solirubrobacteraceae	Solirubrobacter
ASV_1214	0	0	0	0	0	0	0	0	0	0	0	0	0	0	0	0	0	0	0	0	0	0	13	0	0	0	0	0	0	Bacteria	Actinobacteria	Actinobacteria	Actinomycetales	Mycobacteriaceae	Mycobacterium
ASV_1215	0	0	0	0	0	0	0	0	0	0	0	0	0	0	0	0	0	0	0	0	0	0	0	0	0	13	0	0	0	Bacteria	Actinobacteria	Actinobacteria	Actinomycetales	Microbacteriaceae	unclassified_Microbacteriaceae
ASV_1216	0	0	0	0	0	0	0	0	0	0	0	0	0	0	0	0	0	0	0	0	0	0	0	0	0	0	13	0	0	Bacteria	Proteobacteria	Betaproteobacteria	Burkholderiales	Oxalobacteraceae	Massilia
ASV_1217	0	0	0	0	0	0	0	0	0	0	0	0	0	0	0	0	0	0	0	0	0	0	0	0	0	0	13	0	0	Bacteria	Proteobacteria	Betaproteobacteria	Burkholderiales	Comamonadaceae	Polaromonas
ASV_1218	0	0	0	0	0	0	0	0	0	0	0	0	0	0	0	0	0	0	0	0	0	0	0	0	0	0	0	13	0	Bacteria	Actinobacteria	Actinobacteria	Solirubrobacterales	unclassified_Solirubrobacterales	unclassified_Solirubrobacterales
ASV_1219	0	0	0	0	0	0	0	0	0	0	0	0	0	0	0	0	0	0	0	0	0	0	0	0	0	0	0	13	0	Bacteria	Proteobacteria	Alphaproteobacteria	Sphingomonadales	Sphingomonadaceae	Sphingomonas
ASV_1220	0	0	0	0	0	0	0	0	0	0	0	0	0	0	0	0	0	0	0	0	0	0	0	0	0	0	0	0	13	Bacteria	Actinobacteria	Actinobacteria	Actinomycetales	Catenulisporaceae	Catenulispora
ASV_1221	0	0	0	0	0	0	0	0	0	0	0	0	0	0	0	0	0	0	0	0	0	0	0	0	0	0	0	0	13	Bacteria	Bacteroidetes	Sphingobacteriia	Sphingobacteriales	Sphingobacteriaceae	Pedobacter
ASV_1222	12	0	0	0	0	0	0	0	0	0	0	0	0	0	0	0	0	0	0	0	0	0	0	0	0	0	0	0	0	Bacteria	Bacteroidetes	Sphingobacteriia	Sphingobacteriales	Sphingobacteriaceae	Pedobacter
ASV_1223	0	12	0	0	0	0	0	0	0	0	0	0	0	0	0	0	0	0	0	0	0	0	0	0	0	0	0	0	0	Bacteria	Proteobacteria	Betaproteobacteria	Burkholderiales	Oxalobacteraceae	Massilia
ASV_1224	0	12	0	0	0	0	0	0	0	0	0	0	0	0	0	0	0	0	0	0	0	0	0	0	0	0	0	0	0	Bacteria	Bacteroidetes	Flavobacteriia	Flavobacteriales	Flavobacteriaceae	Flavobacterium
ASV_1225	0	0	0	12	0	0	0	0	0	0	0	0	0	0	0	0	0	0	0	0	0	0	0	0	0	0	0	0	0	Bacteria	Bacteroidetes	Cytophagia	Cytophagales	Cytophagaceae	Hymenobacter
ASV_1226	0	0	0	1	0	0	0	0	0	0	0	0	0	0	0	0	0	2	0	4	0	0	1	0	4	0	0	0	0	Bacteria	Proteobacteria	Betaproteobacteria	Burkholderiales	Comamonadaceae	unclassified_Comamonadaceae
ASV_1227	0	0	0	0	12	0	0	0	0	0	0	0	0	0	0	0	0	0	0	0	0	0	0	0	0	0	0	0	0	Bacteria	Proteobacteria	Betaproteobacteria	Burkholderiales	Oxalobacteraceae	Janthinobacterium
ASV_1234	0	0	0	0	0	0	0	0	0	12	0	0	0	0	0	0	0	0	0	0	0	0	0	0	0	0	0	0	0	Bacteria	Actinobacteria	Actinobacteria	Actinomycetales	Micrococcaceae	Arthrobacter
ASV_1235	0	0	0	0	0	0	0	0	0	12	0	0	0	0	0	0	0	0	0	0	0	0	0	0	0	0	0	0	0	Bacteria	Firmicutes	Clostridia	Clostridiales	Ruminococcaceae	Clostridium IV
ASV_1236	0	0	0	0	0	0	0	0	0	0	12	0	0	0	0	0	0	0	0	0	0	0	0	0	0	0	0	0	0	Bacteria	Proteobacteria	Alphaproteobacteria	Rhizobiales	unclassified_Rhizobiales	unclassified_Rhizobiales
ASV_1238	0	0	0	0	0	0	0	0	0	0	12	0	0	0	0	0	0	0	0	0	0	0	0	0	0	0	0	0	0	Bacteria	Actinobacteria	Actinobacteria	Actinomycetales	unclassified_Actinomycetales	unclassified_Actinomycetales
ASV_1239	0	0	0	0	0	0	0	0	0	0	12	0	0	0	0	0	0	0	0	0	0	0	0	0	0	0	0	0	0	Bacteria	Proteobacteria	Deltaproteobacteria	Myxococcales	Myxococcaceae	Myxococcus
ASV_1240	0	0	0	0	0	0	0	0	0	0	0	12	0	0	0	0	0	0	0	0	0	0	0	0	0	0	0	0	0	Bacteria	Actinobacteria	Actinobacteria	Actinomycetales	unclassified_Actinomycetales	unclassified_Actinomycetales
ASV_1241	0	0	0	0	0	0	0	0	0	0	0	12	0	0	0	0	0	0	0	0	0	0	0	0	0	0	0	0	0	Bacteria	Actinobacteria	Actinobacteria	Solirubrobacterales	unclassified_Solirubrobacterales	unclassified_Solirubrobacterales
ASV_1243	0	0	0	0	0	0	0	0	0	0	0	12	0	0	0	0	0	0	0	0	0	0	0	0	0	0	0	0	0	Bacteria	Actinobacteria	Actinobacteria	Gaiellales	Gaiellaceae	Gaiella
ASV_1244	0	0	0	0	0	0	0	0	0	0	0	12	0	0	0	0	0	0	0	0	0	0	0	0	0	0	0	0	0	Bacteria	Proteobacteria	Betaproteobacteria	unclassified_Betaproteobacteria	unclassified_Betaproteobacteria	unclassified_Betaproteobacteria
ASV_1249	0	0	0	0	0	0	0	0	0	0	0	0	0	0	0	0	0	0	0	0	0	0	0	0	0	0	0	0	0	Bacteria	Actinobacteria	Actinobacteria	Actinomycetales	Geodermatophilaceae	Blastococcus
ASV_1250	0	0	0	0	0	0	0	0	0	0	0	0	0	0	0	0	0	0	0	0	0	0	0	0	0	0	0	0	0	Bacteria	Firmicutes	Bacilli	Lactobacillales	Streptococcaceae	Streptococcus
ASV_1251	0	0	0	0	0	0	0	0	0	0	0	0	0	0	12	0	0	0	0	0	0	0	0	0	0	0	0	0	0	Bacteria	Proteobacteria	unclassified_Proteobacteria	unclassified_Proteobacteria	unclassified_Proteobacteria	unclassified_Proteobacteria
ASV_1252	0	0	0	0	0	0	0	0	0	0	0	0	0	0	12	0	0	0	0	0	0	0	0	0	0	0	0	0	0	Bacteria	Bacteroidetes	Sphingobacteriia	Sphingobacteriales	Chitinophagaceae	Ferruginibacter
ASV_1253	0	0	0	0	0	0	0	0	0	0	0	0	0	0	12	0	0	0	0	0	0	0	0	0	0	0	0	0	0	Bacteria	Actinobacteria	Actinobacteria	Actinomycetales	Nocardioidaceae	unclassified_Nocardioidaceae
ASV_1254	0	0	0	0	0	0	0	0	0	0	0	0	0	0	0	12	0	0	0	0	0	0	0	0	0	0	0	0	0	Bacteria	Proteobacteria	Gammaproteobacteria	Pasteurellales	Pasteurellaceae	Haemophilus
ASV_1255	0	0	0	0	0	0	0	0	0	0	0	0	0	0	0	12	0	0	0	0	0	0	0	0	0	0	0	0	0	Bacteria	Candidatus Saccharibacteria	Saccharibacteria_genera_incertae_sedis	Saccharibacteria_genera_incertae_sedis	Saccharibacteria_genera_incertae_sedis	Saccharibacteria_genera_incertae_sedis
ASV_1256	0	0	0	0	0	0	0	0	0	0	0	0	0	0	0	12	0	0	0	0	0	0	0	0	0	0	0	0	0	Bacteria	Planctomycetes	Planctomycetia	Planctomycetales	Planctomycetaceae	unclassified_Planctomycetaceae
ASV_1257	0	0	0	0	0	0	0	0	0	0	0	0	0	0	0	12	0	0	0	0	0	0	0	0	0	0	0	0	0	Bacteria	Firmicutes	Bacilli	Bacillales	Paenibacillaceae 1	Paenibacillus
ASV_1258	0	0	0	0	0	0	0	0	0	0	0	0	0	0	0	12	0	0	0	0	0	0	0	0	0	0	0	0	0	Bacteria	Actinobacteria	Actinobacteria	Actinomycetales	Pseudonocardiaceae	Pseudonocardia
ASV_1259	0	0	0	0	0	0	0	0	0	0	0	0	0	0	0	12	0	0	0	0	0	0	0	0	0	0	0	0	0	Bacteria	Proteobacteria	Alphaproteobacteria	Rhodobacterales	Rhodobacteraceae	Paracoccus
ASV_1260	0	0	0	0	0	0	0	0	0	0	0	0	0	0	0	12	0	0	0	0	0	0	0	0	0	0	0	0	0	Bacteria	Actinobacteria	Actinobacteria	Actinomycetales	Propionibacteriaceae	Propionibacterium
ASV_1261	0	0	0	0	0	0	0	0	0	0	0	0	0	0	0	12	0	0	0	0	0	0	0	0	0	0	0	0	0	Bacteria	unclassified_Bacteria	unclassified_Bacteria	unclassified_Bacteria	unclassified_Bacteria	unclassified_Bacteria
ASV_1262	0	0	0	0	0	0	0	0	0	0	0	0	0	0	0	0	5	0	0	0	5	0	0	0	0	0	2	0	0	Bacteria	Proteobacteria	unclassified_Proteobacteria	unclassified_Proteobacteria	unclassified_Proteobacteria	unclassified_Proteobacteria
ASV_1263	0	0	0	0	0	0	0	0	0	0	0	0	0	0	0	0	0	12	0	0	0	0	0	0	0	0	0	0	0	Bacteria	Proteobacteria	Alphaproteobacteria	Sphingomonadales	Sphingomonadaceae	Novosphingobium
ASV_1265	0	0	0	0	0	0	0	0	0	0	0	0	0	0	0	0	0	12	0	0	0	0	0	0	0	0	0	0	0	Bacteria	Bacteroidetes	Sphingobacteriia	Sphingobacteriales	Sphingobacteriaceae	Pedobacter
ASV_1266	0	0	0	0	0	0	0	0	0	0	0	0	0	0	0	0	0	0	0	12	0	0	0	0	0	0	0	0	0	Bacteria	Actinobacteria	Actinobacteria	Actinomycetales	Nocardiaceae	Nocardia
ASV_1267	0	0	0	0	0	0	0	0	0	0	0	0	0	0	0	0	0	0	0	12	0	0	0	0	0	0	0	0	0	Bacteria	Verrucomicrobia	Spartobacteria	Spartobacteria_genera_incertae_sedis	Spartobacteria_genera_incertae_sedis	Spartobacteria_genera_incertae_sedis
ASV_1268	0	0	0	0	0	0	0	0	0	0	0	0	0	0	0	0	0	0	0	0	12	0	0	0	0	0	0	0	0	Bacteria	Proteobacteria	Betaproteobacteria	Burkholderiales	Comamonadaceae	unclassified_Comamonadaceae
ASV_1269	0	0	0	0	0	0	0	0	0	0	0	0	0	0	0	0	0	0	0	0	12	0	0	0	0	0	0	0	0	Bacteria	Actinobacteria	Actinobacteria	Actinomycetales	Pseudonocardiaceae	Pseudonocardia
ASV_1270	0	0	0	0	0	0	0	0	0	0	0	0	0	0	0	0	0	0	0	0	4	0	8	0	0	0	0	0	0	Bacteria	Actinobacteria	Actinobacteria	unclassified_Actinobacteria	unclassified_Actinobacteria	unclassified_Actinobacteria
ASV_1271	0	0	0	0	0	0	0	0	0	0	0	0	0	0	0	0	0	0	0	0	0	0	0	0	0	0	0	12	0	Bacteria	Proteobacteria	Alphaproteobacteria	Sphingomonadales	Sphingomonadaceae	Sphingomonas
ASV_1272	0	0	0	0	0	0	0	0	0	0	0	0	0	0	0	0	0	0	0	0	0	0	0	0	0	0	0	5	7	Bacteria	Firmicutes	Bacilli	Bacillales	Paenibacillaceae 1	unclassified_Paenibacillaceae 1
ASV_1273	0	0	0	0	0	0	0	0	0	0	0	0	0	0	0	0	0	0	0	0	0	0	0	0	0	0	0	6	0	Bacteria	Actinobacteria	Actinobacteria	Solirubrobacterales	unclassified_Solirubrobacterales	unclassified_Solirubrobacterales
ASV_1274	11	0	0	0	0	0	0	0	0	0	0	0	0	0	0	0	0	0	0	0	0	0	0	0	0	0	0	0	0	Bacteria	Firmicutes	Bacilli	Bacillales	Paenibacillaceae 1	Paenibacillus
ASV_1275	0	3	0	0	0	0	0	0	0	0	0	0	0	0	0	0	0	0	0	0	0	7	0	0	0	0	0	0	1	Bacteria	Bacteroidetes	Sphingobacteriia	Sphingobacteriales	Sphingobacteriaceae	Pedobacter
ASV_1276	0	0	1	0	0	0	0	0	0	0	0	0	0	0	0	0	0	0	0	0	0	0	0	0	0	4	1	5	0	Bacteria	Proteobacteria	Alphaproteobacteria	Rhodobacterales	Rhodobacteraceae	Gemmobacter
ASV_1277	0	0	0	0	0	11	0	0	0	0	0	0	0	0	0	0	0	0	0	0	0	0	0	0	0	0	0	0	0	Bacteria	Bacteroidetes	Flavobacteriia	Flavobacteriales	Flavobacteriaceae	Flavobacterium
ASV_1278	0	0	0	0	0	0	0	0	0	0	0	0	0	0	0	0	0	0	0	0	0	0	0	0	0	0	0	0	0	Bacteria	Firmicutes	Bacilli	Bacillales	Planococcaceae	Sporosarcina
ASV_1279	0	0	0	0	0	0	0	0	0	0	0	0	0	0	0	0	0	0	0	0	0	0	0	0	0	0	0	0	0	Bacteria	Firmicutes	Bacilli	Lactobacillales	Streptococcaceae	Lactococcus
ASV_1280	0	0	0	0	0	0	0	0	0	0	0	0	0	0	0	0	0	0	0	0	0	0	0	0	0	0	0	0	0	Bacteria	Firmicutes	Clostridia	Clostridiales	Clostridiaceae 1	Clostridium sensu stricto
ASV_1281	0	0	0	0	0	0	0	0	11	0	0	0	0	0	0	0	0	0	0	0	0	0	0	0	0	0	0	0	0	Bacteria	Proteobacteria	Deltaproteobacteria	Myxococcales	unclassified_Myxococcales	unclassified_Myxococcales
ASV_1282	0	0	0	0	0	0	0	0	0	11	0	0	0	0	0	0	0	0	0	0	0	0	0	0	0	0	0	0	0	Bacteria	Actinobacteria	Actinobacteria	Actinomycetales	Intrasporangiaceae	Oryzihumus
ASV_1283	0	0	0	0	0	0	0	0	0	11	0	0	0	0	0	0	0	0	0	0	0	0	0	0	0	0	0	0	0	Bacteria	Proteobacteria	Alphaproteobacteria	Rhizobiales	Methylobacteriaceae	Methylobacterium
ASV_1284	0	0	0	0	0	0	0	0	0	11	0	0	0	0	0	0	0	0	0	0	0	0	0	0	0	0	0	0	0	Bacteria	Actinobacteria	Actinobacteria	Acidimicrobiales	unclassified_Acidimicrobiales	unclassified_Acidimicrobiales
ASV_1286	0	0	0	0	0	0	0	0	0	0	11	0	0	0	0	0	0	0	0	0	0	0	0	0	0	0	0	0	0	Bacteria	Actinobacteria	Actinobacteria	Solirubrobacterales	Conexibacteraceae	Conexibacter
ASV_1288	0	0	0	0	0	0	0	0	0	0	11	0	0	0	0	0	0	0	0	0	0	0	0	0	0	0	0	0	0	Bacteria	Chloroflexi	Thermomicrobia	Sphaerobacterales	Sphaerobacteraceae	unclassified_Sphaerobacteraceae
ASV_1289	0	0	0	0	0	0	0	0	0	0	11	0	0	0	0	0	0	0	0	0	0	0	0	0	0	0	0	0	0	Bacteria	Actinobacteria	Actinobacteria	Actinomycetales	Propionibacteriaceae	Microlunatus
ASV_1290	0	0	0	0	0	0	0	0	0	0	11	0	0	0	0	0	0	0	0	0	0	0	0	0	0	0	0	0	0	Bacteria	Gemmatimonadetes	Gemmatimonadetes	Gemmatimonadales	Gemmatimonadaceae	Gemmatimonas
ASV_1292	0	0	0	0	0	0	0	0	0	0	0	11	0	0	0	0	0	0	0	0	0	0	0	0	0	0	0	0	0	Bacteria	Bacteroidetes	Cytophagia	Cytophagales	Cytophagaceae	Hymenobacter
ASV_1296	0	0	0	0	0	0	0	0	0	0	0	0	0	0	0	0	0	0	0	0	0	0	0	0	0	0	0	0	0	Bacteria	Actinobacteria	Actinobacteria	Actinomycetales	Pseudonocardiaceae	Pseudonocardia
ASV_1297	0	0	0	0	0	0	0	0	0	0	0	0	0	0	0	0	0	0	0	0	0	0	0	0	0	0	0	0	0	Bacteria	unclassified_Bacteria	unclassified_Bacteria	unclassified_Bacteria	unclassified_Bacteria	unclassified_Bacteria
ASV_1298	0	0	0	0	0	0	0	0	0	0	0	0	0	0	0	0	0	0	0	0	0	0	0	0	0	0	0	0	0	Bacteria	Chloroflexi	Thermomicrobia	Sphaerobacterales	Sphaerobacteraceae	unclassified_Sphaerobacteraceae
ASV_1308	0	0	0	0	0	0	0	0	0	0	0	0	0	0	11	0	0	0	0	0	0	0	0	0	0	0	0	0	0	Bacteria	Proteobacteria	unclassified_Proteobacteria	unclassified_Proteobacteria	unclassified_Proteobacteria	unclassified_Proteobacteria
ASV_1309	0	0	0	0	0	0	0	0	0	0	0	0	0	0	11	0	0	0	0	0	0	0	0	0	0	0	0	0	0	Bacteria	Proteobacteria	Alphaproteobacteria	Rhizobiales	Methylobacteriaceae	unclassified_Methylobacteriaceae
ASV_1310	0	0	0	0	0	0	0	0	0	0	0	0	0	0	11	0	0	0	0	0	0	0	0	0	0	0	0	0	0	Bacteria	Actinobacteria	Actinobacteria	Gaiellales	Gaiellaceae	Gaiella
ASV_1311	0	0	0	0	0	0	0	0	0	0	0	0	0	0	11	0	0	0	0	0	0	0	0	0	0	0	0	0	0	Bacteria	Actinobacteria	Actinobacteria	Solirubrobacterales	Conexibacteraceae	Conexibacter
ASV_1314	0	0	0	0	0	0	0	0	0	0	0	0	0	0	11	0	0	0	0	0	0	0	0	0	0	0	0	0	0	Bacteria	unclassified_Bacteria	unclassified_Bacteria	unclassified_Bacteria	unclassified_Bacteria	unclassified_Bacteria
ASV_1315	0	0	0	0	0	0	0	0	0	0	0	0	0	0	0	0	0	0	0	0	0	0	0	0	0	0	0	0	0	Bacteria	Proteobacteria	Betaproteobacteria	Burkholderiales	Comamonadaceae	unclassified_Comamonadaceae
ASV_1316	0	0	0	0	0	0	0	0	0	0	0	0	0	0	0	11	0	0	0	0	0	0	0	0	0	0	0	0	0	Bacteria	unclassified_Bacteria	unclassified_Bacteria	unclassified_Bacteria	unclassified_Bacteria	unclassified_Bacteria
ASV_1317	0	0	0	0	0	0	0	0	0	0	0	0	0	0	0	11	0	0	0	0	0	0	0	0	0	0	0	0	0	Bacteria	Proteobacteria	Alphaproteobacteria	Rhizobiales	Methylobacteriaceae	Microvirga
ASV_1318	0	0	0	0	0	0	0	0	0	0	0	0	0	0	0	11	0	0	0	0	0	0	0	0	0	0	0	0	0	Bacteria	Actinobacteria	Actinobacteria	Actinomycetales	Dermabacteraceae	Brachybacterium
ASV_1319	0	0	0	0	0	0	0	0	0	0	0	0	0	0	0	11	0	0	0	0	0	0	0	0	0	0	0	0	0	Bacteria	Actinobacteria	Actinobacteria	Gaiellales	Gaiellaceae	Gaiella
ASV_1320	0	0	0	0	0	0	0	0	0	0	0	0	0	0	0	11	0	0	0	0	0	0	0	0	0	0	0	0	0	Bacteria	Actinobacteria	Actinobacteria	Actinomycetales	Pseudonocardiaceae	Actinomycetospora
ASV_1321	0	0	0	0	0	0	0	0	0	0	0	0	0	0	0	11	0	0	0	0	0	0	0	0	0	0	0	0	0	Bacteria	Chloroflexi	unclassified_Chloroflexi	unclassified_Chloroflexi	unclassified_Chloroflexi	unclassified_Chloroflexi
ASV_1322	0	0	0	0	0	0	0	0	0	0	0	0	0	0	0	11	0	0	0	0	0	0	0	0	0	0	0	0	0	Bacteria	Proteobacteria	Alphaproteobacteria	Rhizobiales	unclassified_Rhizobiales	unclassified_Rhizobiales
ASV_1323	0	0	0	0	0	0	0	0	0	0	0	0	0	0	0	11	0	0	0	0	0	0	0	0	0	0	0	0	0	Bacteria	unclassified_Bacteria	unclassified_Bacteria	unclassified_Bacteria	unclassified_Bacteria	unclassified_Bacteria
ASV_1324	0	0	0	0	0	0	0	0	0	0	0	0	0	0	0	0	0	11	0	0	0	0	0	0	0	0	0	0	0	Bacteria	Bacteroidetes	Sphingobacteriia	Sphingobacteriales	Sphingobacteriaceae	Mucilaginibacter
ASV_1325	0	0	0	0	0	0	0	0	0	0	0	0	0	0	0	0	0	11	0	0	0	0	0	0	0	0	0	0	0	Bacteria	Actinobacteria	Actinobacteria	unclassified_Actinobacteria	unclassified_Actinobacteria	unclassified_Actinobacteria
ASV_1326	0	0	0	0	0	0	0	0	0	0	0	0	0	0	0	0	0	0	0	11	0	0	0	0	0	0	0	0	0	Bacteria	Actinobacteria	Actinobacteria	Actinomycetales	Nocardioidaceae	Nocardioides
ASV_1327	0	0	0	0	0	0	0	0	0	0	0	0	0	0	0	0	0	0	0	0	11	0	0	0	0	0	0	0	0	Bacteria	Actinobacteria	Actinobacteria	Actinomycetales	Nocardioidaceae	Nocardioides
ASV_1328	0	0	0	0	0	0	0	0	0	0	0	0	0	0	0	0	0	0	0	0	0	0	0	11	0	0	0	0	0	Bacteria	Actinobacteria	Actinobacteria	Actinomycetales	Geodermatophilaceae	unclassified_Geodermatophilaceae
ASV_1329	0	0	0	0	0	0	0	0	0	0	0	0	0	0	0	0	0	0	0	0	0	0	0	0	0	0	11	0	0	Bacteria	Proteobacteria	Betaproteobacteria	Burkholderiales	Oxalobacteraceae	Duganella
ASV_1330	0	0	0	0	0	0	0	0	0	0	0	0	0	0	0	0	0	0	0	0	0	0	0	0	0	0	11	0	0	Bacteria	Actinobacteria	Actinobacteria	Actinomycetales	Microbacteriaceae	unclassified_Microbacteriaceae
ASV_1331	0	0	0	0	0	0	0	0	0	0	0	0	0	0	0	0	0	0	0	0	0	0	0	0	0	0	11	0	0	Bacteria	Actinobacteria	Actinobacteria	unclassified_Actinobacteria	unclassified_Actinobacteria	unclassified_Actinobacteria
ASV_1332	0	0	0	0	0	0	0	0	0	0	0	0	0	0	0	0	0	0	0	0	0	0	0	0	0	0	0	11	0	Bacteria	Proteobacteria	Alphaproteobacteria	Rhizobiales	Methylobacteriaceae	Microvirga
ASV_1333	0	0	0	0	0	0	0	0	0	0	0	0	0	0	0	0	0	0	0	0	0	0	0	0	0	0	0	0	11	Bacteria	Bacteroidetes	Sphingobacteriia	Sphingobacteriales	Sphingobacteriaceae	Pedobacter
ASV_1334	0	10	0	0	0	0	0	0	0	0	0	0	0	0	0	0	0	0	0	0	0	0	0	0	0	0	0	0	0	Bacteria	Bacteroidetes	Sphingobacteriia	Sphingobacteriales	Sphingobacteriaceae	Pedobacter
ASV_1335	0	10	0	0	0	0	0	0	0	0	0	0	0	0	0	0	0	0	0	0	0	0	0	0	0	0	0	0	0	Bacteria	Proteobacteria	Betaproteobacteria	Burkholderiales	Comamonadaceae	Polaromonas
ASV_1336	0	0	0	10	0	0	0	0	0	0	0	0	0	0	0	0	0	0	0	0	0	0	0	0	0	0	0	0	0	Bacteria	Bacteroidetes	Sphingobacteriia	Sphingobacteriales	Sphingobacteriaceae	Pedobacter
ASV_1338	0	0	0	0	0	0	0	10	0	0	0	0	0	0	0	0	0	0	0	0	0	0	0	0	0	0	0	0	0	Bacteria	Actinobacteria	Actinobacteria	Gaiellales	Gaiellaceae	Gaiella
ASV_1339	0	0	0	0	0	0	0	10	0	0	0	0	0	0	0	0	0	0	0	0	0	0	0	0	0	0	0	0	0	Bacteria	Bacteroidetes	Cytophagia	Cytophagales	Cytophagaceae	Hymenobacter
ASV_1340	0	0	0	0	0	0	0	3	0	0	0	0	0	0	7	0	0	0	0	0	0	0	0	0	0	0	0	0	0	Bacteria	Firmicutes	Clostridia	Clostridiales	Clostridiales_Incertae Sedis XI	Anaerococcus
ASV_1343	0	0	0	0	0	0	0	0	0	0	0	0	0	0	0	0	0	0	0	0	0	0	0	0	0	0	0	0	0	Bacteria	Firmicutes	Bacilli	Bacillales	Bacillaceae 1	Bacillus
ASV_1344	0	0	0	0	0	0	0	0	0	0	0	0	0	0	0	0	0	0	0	0	0	0	0	0	0	0	0	0	0	Bacteria	Firmicutes	Bacilli	Lactobacillales	Enterococcaceae	Enterococcus
ASV_1345	0	0	0	0	0	0	0	0	0	0	0	0	0	0	0	0	0	0	0	0	0	0	0	0	0	0	0	0	0	Bacteria	Actinobacteria	unclassified_Actinobacteria	unclassified_Actinobacteria	unclassified_Actinobacteria	unclassified_Actinobacteria
ASV_1347	0	0	0	0	0	0	0	0	0	10	0	0	0	0	0	0	0	0	0	0	0	0	0	0	0	0	0	0	0	Bacteria	Firmicutes	Clostridia	Clostridiales	Clostridiaceae 1	Clostridium sensu stricto
ASV_1350	0	0	0	0	0	0	0	0	0	10	0	0	0	0	0	0	0	0	0	0	0	0	0	0	0	0	0	0	0	Bacteria	Proteobacteria	Betaproteobacteria	Burkholderiales	Burkholderiales_incertae_sedis	Tepidimonas
ASV_1351	0	0	0	0	0	0	0	0	0	10	0	0	0	0	0	0	0	0	0	0	0	0	0	0	0	0	0	0	0	Bacteria	Actinobacteria	Actinobacteria	Solirubrobacterales	Solirubrobacteraceae	Solirubrobacter
ASV_1353	0	0	0	0	0	0	0	0	0	0	10	0	0	0	0	0	0	0	0	0	0	0	0	0	0	0	0	0	0	Bacteria	Actinobacteria	Actinobacteria	Actinomycetales	Mycobacteriaceae	Mycobacterium
ASV_1354	0	0	0	0	0	0	0	0	0	0	10	0	0	0	0	0	0	0	0	0	0	0	0	0	0	0	0	0	0	Bacteria	Proteobacteria	Alphaproteobacteria	Rhizobiales	unclassified_Rhizobiales	unclassified_Rhizobiales
ASV_1355	0	0	0	0	0	0	0	0	0	0	10	0	0	0	0	0	0	0	0	0	0	0	0	0	0	0	0	0	0	Bacteria	Actinobacteria	Actinobacteria	Actinomycetales	Pseudonocardiaceae	Pseudonocardia
ASV_1356	0	0	0	0	0	0	0	0	0	0	10	0	0	0	0	0	0	0	0	0	0	0	0	0	0	0	0	0	0	Bacteria	Proteobacteria	Alphaproteobacteria	Rhizobiales	Methylobacteriaceae	Microvirga
ASV_1357	0	0	0	0	0	0	0	0	0	0	6	0	0	0	0	4	0	0	0	0	0	0	0	0	0	0	0	0	0	Bacteria	Firmicutes	Clostridia	Clostridiales	Peptoniphilaceae	Peptoniphilus
ASV_1358	0	0	0	0	0	0	0	0	0	0	4	0	0	0	0	0	0	0	0	4	0	2	0	0	0	0	0	0	0	Bacteria	unclassified_Bacteria	unclassified_Bacteria	unclassified_Bacteria	unclassified_Bacteria	unclassified_Bacteria
ASV_1359	0	0	0	0	0	0	0	0	0	0	0	10	0	0	0	0	0	0	0	0	0	0	0	0	0	0	0	0	0	Bacteria	Actinobacteria	Actinobacteria	Gaiellales	Gaiellaceae	Gaiella
ASV_1360	0	0	0	0	0	0	0	0	0	0	0	10	0	0	0	0	0	0	0	0	0	0	0	0	0	0	0	0	0	Bacteria	Actinobacteria	Actinobacteria	Actinomycetales	Propionibacteriaceae	unclassified_Propionibacteriaceae
ASV_1362	0	0	0	0	0	0	0	0	0	0	0	10	0	0	0	0	0	0	0	0	0	0	0	0	0	0	0	0	0	Bacteria	Bacteroidetes	Cytophagia	Cytophagales	Cytophagaceae	Hymenobacter
ASV_1363	0	0	0	0	0	0	0	0	0	0	0	0	0	0	0	0	0	0	0	0	0	0	0	0	0	0	0	0	0	Bacteria	Actinobacteria	Actinobacteria	Actinomycetales	Geodermatophilaceae	Modestobacter
ASV_1364	0	0	0	0	0	0	0	0	0	0	0	0	0	0	0	0	0	0	0	0	0	0	0	0	0	0	0	0	0	Bacteria	Actinobacteria	Actinobacteria	Actinomycetales	Streptomycetaceae	Streptomyces
ASV_1375	0	0	0	0	0	0	0	0	0	0	0	0	10	0	0	0	0	0	0	0	0	0	0	0	0	0	0	0	0	Bacteria	Actinobacteria	Actinobacteria	Actinomycetales	Nocardioidaceae	unclassified_Nocardioidaceae
ASV_1376	0	0	0	0	0	0	0	0	0	0	0	0	10	0	0	0	0	0	0	0	0	0	0	0	0	0	0	0	0	Bacteria	Acidobacteria	Acidobacteria_Gp16	Gp16	Gp16	Gp16
ASV_1377	0	0	0	0	0	0	0	0	0	0	0	0	10	0	0	0	0	0	0	0	0	0	0	0	0	0	0	0	0	Bacteria	Firmicutes	Clostridia	Clostridiales	Ruminococcaceae	Ruminococcus
ASV_1380	0	0	0	0	0	0	0	0	0	0	0	0	0	0	0	0	0	0	0	0	0	0	0	0	0	0	0	0	0	Bacteria	Firmicutes	Bacilli	Bacillales	Bacillaceae 1	Bacillus
ASV_1381	0	0	0	0	0	0	0	0	0	0	0	0	0	0	0	0	0	0	0	0	0	0	0	0	0	0	0	0	0	Bacteria	Actinobacteria	unclassified_Actinobacteria	unclassified_Actinobacteria	unclassified_Actinobacteria	unclassified_Actinobacteria
ASV_1383	0	0	0	0	0	0	0	0	0	0	0	0	0	0	0	0	0	0	0	0	0	0	0	0	0	0	0	0	0	Bacteria	unclassified_Bacteria	unclassified_Bacteria	unclassified_Bacteria	unclassified_Bacteria	unclassified_Bacteria
ASV_1385	0	0	0	0	0	0	0	0	0	0	0	0	0	0	10	0	0	0	0	0	0	0	0	0	0	0	0	0	0	Bacteria	Proteobacteria	Betaproteobacteria	Burkholderiales	Oxalobacteraceae	Massilia
ASV_1386	0	0	0	0	0	0	0	0	0	0	0	0	0	0	10	0	0	0	0	0	0	0	0	0	0	0	0	0	0	Bacteria	candidate division WPS-1	WPS-1_genera_incertae_sedis	WPS-1_genera_incertae_sedis	WPS-1_genera_incertae_sedis	WPS-1_genera_incertae_sedis
ASV_1389	0	0	0	0	0	0	0	0	0	0	0	0	0	0	0	0	0	0	0	0	0	0	0	0	0	0	0	0	0	Bacteria	Actinobacteria	Actinobacteria	Actinomycetales	Nocardioidaceae	Nocardioides
ASV_1390	0	0	0	0	0	0	0	0	0	0	0	0	0	0	0	0	0	0	0	0	0	0	0	0	0	0	0	0	0	Bacteria	Proteobacteria	Betaproteobacteria	Burkholderiales	Oxalobacteraceae	unclassified_Oxalobacteraceae
ASV_1391	0	0	0	0	0	0	0	0	0	0	0	0	0	0	0	0	0	0	0	0	0	0	0	0	0	0	0	0	0	Bacteria	Verrucomicrobia	Verrucomicrobiae	Verrucomicrobiales	Verrucomicrobiaceae	Luteolibacter
ASV_1392	0	0	0	0	0	0	0	0	0	0	0	0	0	0	0	10	0	0	0	0	0	0	0	0	0	0	0	0	0	Bacteria	Proteobacteria	Alphaproteobacteria	Rhodospirillales	Acetobacteraceae	unclassified_Acetobacteraceae
ASV_1393	0	0	0	0	0	0	0	0	0	0	0	0	0	0	0	10	0	0	0	0	0	0	0	0	0	0	0	0	0	Bacteria	Gemmatimonadetes	Gemmatimonadetes	Gemmatimonadales	Gemmatimonadaceae	Gemmatimonas
ASV_1394	0	0	0	0	0	0	0	0	0	0	0	0	0	0	0	10	0	0	0	0	0	0	0	0	0	0	0	0	0	Bacteria	Actinobacteria	Actinobacteria	Bifidobacteriales	Bifidobacteriaceae	Gardnerella
ASV_1395	0	0	0	0	0	0	0	0	0	0	0	0	0	0	0	0	10	0	0	0	0	0	0	0	0	0	0	0	0	Bacteria	Actinobacteria	Actinobacteria	Actinomycetales	Pseudonocardiaceae	Lechevalieria
ASV_1396	0	0	0	0	0	0	0	0	0	0	0	0	0	0	0	0	10	0	0	0	0	0	0	0	0	0	0	0	0	Bacteria	Proteobacteria	Betaproteobacteria	Burkholderiales	Alcaligenaceae	Achromobacter
ASV_1397	0	0	0	0	0	0	0	0	0	0	0	0	0	0	0	0	10	0	0	0	0	0	0	0	0	0	0	0	0	Bacteria	Actinobacteria	Actinobacteria	Acidimicrobiales	Acidimicrobiaceae	Ilumatobacter
ASV_1398	0	0	0	0	0	0	0	0	0	0	0	0	0	0	0	0	4	1	0	0	5	0	0	0	0	0	0	0	0	Bacteria	Bacteroidetes	Flavobacteriia	Flavobacteriales	Flavobacteriaceae	Flavobacterium
ASV_1399	0	0	0	0	0	0	0	0	0	0	0	0	0	0	0	0	0	10	0	0	0	0	0	0	0	0	0	0	0	Bacteria	Acidobacteria	Acidobacteria_Gp6	Gp6	Gp6	Gp6
ASV_1400	0	0	0	0	0	0	0	0	0	0	0	0	0	0	0	0	0	10	0	0	0	0	0	0	0	0	0	0	0	Bacteria	Planctomycetes	Planctomycetia	Planctomycetales	Planctomycetaceae	Singulisphaera
ASV_1401	0	0	0	0	0	0	0	0	0	0	0	0	0	0	0	0	0	0	10	0	0	0	0	0	0	0	0	0	0	Bacteria	Actinobacteria	Actinobacteria	unclassified_Actinobacteria	unclassified_Actinobacteria	unclassified_Actinobacteria
ASV_1402	0	0	0	0	0	0	0	0	0	0	0	0	0	0	0	0	0	0	0	10	0	0	0	0	0	0	0	0	0	Bacteria	Verrucomicrobia	Verrucomicrobiae	Verrucomicrobiales	Verrucomicrobiaceae	Luteolibacter
ASV_1403	0	0	0	0	0	0	0	0	0	0	0	0	0	0	0	0	0	0	0	10	0	0	0	0	0	0	0	0	0	Bacteria	Firmicutes	Bacilli	Bacillales	Paenibacillaceae 1	Paenibacillus
ASV_1404	0	0	0	0	0	0	0	0	0	0	0	0	0	0	0	0	0	0	0	0	0	0	10	0	0	0	0	0	0	Bacteria	Proteobacteria	Alphaproteobacteria	Rhizobiales	Xanthobacteraceae	Ancylobacter
ASV_1405	0	0	0	0	0	0	0	0	0	0	0	0	0	0	0	0	0	0	0	0	0	0	10	0	0	0	0	0	0	Bacteria	Actinobacteria	Actinobacteria	Gaiellales	Gaiellaceae	Gaiella
ASV_1406	0	0	0	0	0	0	0	0	0	0	0	0	0	0	0	0	0	0	0	0	0	0	10	0	0	0	0	0	0	Bacteria	Actinobacteria	Actinobacteria	Actinomycetales	Thermomonosporaceae	Actinocorallia
ASV_1407	0	0	0	0	0	0	0	0	0	0	0	0	0	0	0	0	0	0	0	0	0	0	6	0	4	0	0	0	0	Bacteria	Actinobacteria	Actinobacteria	Actinomycetales	Nocardioidaceae	unclassified_Nocardioidaceae
ASV_1408	0	0	0	0	0	0	0	0	0	0	0	0	0	0	0	0	0	0	0	0	0	0	3	0	0	0	7	0	0	Bacteria	Actinobacteria	Actinobacteria	Actinomycetales	unclassified_Actinomycetales	unclassified_Actinomycetales
ASV_1409	0	0	0	0	0	0	0	0	0	0	0	0	0	0	0	0	0	0	0	0	0	0	0	10	0	0	0	0	0	Bacteria	Actinobacteria	Actinobacteria	Actinomycetales	Thermomonosporaceae	Actinoallomurus
ASV_1410	0	0	0	0	0	0	0	0	0	0	0	0	0	0	0	0	0	0	0	0	0	0	0	0	0	10	0	0	0	Bacteria	Proteobacteria	Gammaproteobacteria	Xanthomonadales	Xanthomonadaceae	Lysobacter
ASV_1411	0	0	0	0	0	0	0	0	0	0	0	0	0	0	0	0	0	0	0	0	0	0	0	0	0	0	0	10	0	Bacteria	Actinobacteria	Actinobacteria	Actinomycetales	Micrococcaceae	Rothia
ASV_1412	0	0	0	0	0	0	0	0	0	0	0	0	0	0	0	0	0	0	0	0	0	0	0	0	0	0	0	10	0	Bacteria	Proteobacteria	Alphaproteobacteria	Sphingomonadales	Sphingomonadaceae	Sphingobium
ASV_1413	0	0	0	0	0	0	0	0	0	0	0	0	0	0	0	0	0	0	0	0	0	0	0	0	0	0	0	10	0	Bacteria	Proteobacteria	Alphaproteobacteria	Sphingomonadales	Sphingomonadaceae	Sphingomonas
ASV_1414	0	9	0	0	0	0	0	0	0	0	0	0	0	0	0	0	0	0	0	0	0	0	0	0	0	0	0	0	0	Bacteria	Proteobacteria	unclassified_Proteobacteria	unclassified_Proteobacteria	unclassified_Proteobacteria	unclassified_Proteobacteria
ASV_1415	0	0	9	0	0	0	0	0	0	0	0	0	0	0	0	0	0	0	0	0	0	0	0	0	0	0	0	0	0	Bacteria	Proteobacteria	Betaproteobacteria	Burkholderiales	Oxalobacteraceae	unclassified_Oxalobacteraceae
ASV_1417	0	0	1	0	0	0	0	0	0	0	0	0	0	0	0	0	0	0	0	0	0	0	0	1	0	2	0	1	1	Bacteria	Firmicutes	Bacilli	Bacillales	Thermoactinomycetaceae 1	unclassified_Thermoactinomycetaceae 1
ASV_1418	0	0	0	9	0	0	0	0	0	0	0	0	0	0	0	0	0	0	0	0	0	0	0	0	0	0	0	0	0	Bacteria	Bacteroidetes	Sphingobacteriia	Sphingobacteriales	Sphingobacteriaceae	Pedobacter
ASV_1419	0	0	0	0	9	0	0	0	0	0	0	0	0	0	0	0	0	0	0	0	0	0	0	0	0	0	0	0	0	Bacteria	Firmicutes	Bacilli	Bacillales	Paenibacillaceae 1	Paenibacillus
ASV_1420	0	0	0	0	9	0	0	0	0	0	0	0	0	0	0	0	0	0	0	0	0	0	0	0	0	0	0	0	0	Bacteria	Proteobacteria	Betaproteobacteria	Burkholderiales	Comamonadaceae	unclassified_Comamonadaceae
ASV_1421	0	0	0	0	0	9	0	0	0	0	0	0	0	0	0	0	0	0	0	0	0	0	0	0	0	0	0	0	0	Bacteria	Actinobacteria	Actinobacteria	Actinomycetales	Microbacteriaceae	Clavibacter
ASV_1422	0	0	0	0	0	0	0	0	0	0	0	0	0	0	0	0	0	0	0	0	0	0	0	0	0	0	0	0	0	Bacteria	Firmicutes	Bacilli	Lactobacillales	Enterococcaceae	Enterococcus
ASV_1424	0	0	0	0	0	0	0	9	0	0	0	0	0	0	0	0	0	0	0	0	0	0	0	0	0	0	0	0	0	Bacteria	Firmicutes	Bacilli	Bacillales	Paenibacillaceae 1	Paenibacillus
ASV_1425	0	0	0	0	0	0	0	9	0	0	0	0	0	0	0	0	0	0	0	0	0	0	0	0	0	0	0	0	0	Bacteria	Firmicutes	Bacilli	Bacillales	Planococcaceae	unclassified_Planococcaceae
ASV_1426	0	0	0	0	0	0	0	0	0	0	0	0	0	0	0	0	0	0	0	0	0	0	0	0	0	0	0	0	0	Bacteria	Actinobacteria	Actinobacteria	Actinomycetales	Corynebacteriaceae	Corynebacterium
ASV_1431	0	0	0	0	0	0	0	0	0	9	0	0	0	0	0	0	0	0	0	0	0	0	0	0	0	0	0	0	0	Bacteria	Firmicutes	Bacilli	Bacillales	Planococcaceae	Sporosarcina
ASV_1432	0	0	0	0	0	0	0	0	0	9	0	0	0	0	0	0	0	0	0	0	0	0	0	0	0	0	0	0	0	Bacteria	unclassified_Bacteria	unclassified_Bacteria	unclassified_Bacteria	unclassified_Bacteria	unclassified_Bacteria
ASV_1433	0	0	0	0	0	0	0	0	0	9	0	0	0	0	0	0	0	0	0	0	0	0	0	0	0	0	0	0	0	Bacteria	Firmicutes	Bacilli	Bacillales	Bacillaceae 1	Bacillus
ASV_1434	0	0	0	0	0	0	0	0	0	0	9	0	0	0	0	0	0	0	0	0	0	0	0	0	0	0	0	0	0	Bacteria	Gemmatimonadetes	Gemmatimonadetes	Gemmatimonadales	Gemmatimonadaceae	Gemmatimonas
ASV_1435	0	0	0	0	0	0	0	0	0	0	9	0	0	0	0	0	0	0	0	0	0	0	0	0	0	0	0	0	0	Bacteria	Acidobacteria	Acidobacteria_Gp3	Candidatus Solibacter	Candidatus Solibacter	Candidatus Solibacter
ASV_1443	0	0	0	0	0	0	0	0	0	0	0	0	0	0	0	0	0	0	0	0	0	0	0	0	0	0	0	0	0	Bacteria	Proteobacteria	Betaproteobacteria	Burkholderiales	Oxalobacteraceae	unclassified_Oxalobacteraceae
ASV_1444	0	0	0	0	0	0	0	0	0	0	0	0	0	0	0	0	0	0	0	0	0	0	0	0	0	0	0	0	0	Bacteria	Proteobacteria	Alphaproteobacteria	Rhodospirillales	Rhodospirillaceae	Skermanella
ASV_1445	0	0	0	0	0	0	0	0	0	0	0	0	0	0	0	0	0	0	0	0	0	0	0	0	0	0	0	0	0	Bacteria	Actinobacteria	Actinobacteria	Solirubrobacterales	Solirubrobacteraceae	Solirubrobacter
ASV_1448	0	0	0	0	0	0	0	0	0	0	0	0	0	9	0	0	0	0	0	0	0	0	0	0	0	0	0	0	0	Bacteria	Bacteroidetes	Sphingobacteriia	Sphingobacteriales	Chitinophagaceae	unclassified_Chitinophagaceae
ASV_1449	0	0	0	0	0	0	0	0	0	0	0	0	0	9	0	0	0	0	0	0	0	0	0	0	0	0	0	0	0	Bacteria	Bacteroidetes	Flavobacteriia	Flavobacteriales	Flavobacteriaceae	Flavobacterium
ASV_1450	0	0	0	0	0	0	0	0	0	0	0	0	0	9	0	0	0	0	0	0	0	0	0	0	0	0	0	0	0	Bacteria	Acidobacteria	Acidobacteria_Gp3	Gp3	Gp3	Gp3
ASV_1451	0	0	0	0	0	0	0	0	0	0	0	0	0	9	0	0	0	0	0	0	0	0	0	0	0	0	0	0	0	Bacteria	Proteobacteria	Alphaproteobacteria	Alphaproteobacteria_incertae_sedis	Geminicoccus	Geminicoccus
ASV_1452	0	0	0	0	0	0	0	0	0	0	0	0	0	9	0	0	0	0	0	0	0	0	0	0	0	0	0	0	0	Bacteria	Actinobacteria	Actinobacteria	Actinomycetales	unclassified_Actinomycetales	unclassified_Actinomycetales
ASV_1454	0	0	0	0	0	0	0	0	0	0	0	0	0	0	0	0	0	0	0	0	0	0	0	0	0	0	0	0	0	Bacteria	Firmicutes	Bacilli	Bacillales	Paenibacillaceae 1	Paenibacillus
ASV_1456	0	0	0	0	0	0	0	0	0	0	0	0	0	0	0	0	0	0	0	0	0	0	0	0	0	0	0	0	0	Bacteria	Firmicutes	Bacilli	Bacillales	Bacillaceae 1	Bacillus
ASV_1457	0	0	0	0	0	0	0	0	0	0	0	0	0	0	0	0	0	0	0	0	0	0	0	0	0	0	0	0	0	Bacteria	unclassified_Bacteria	unclassified_Bacteria	unclassified_Bacteria	unclassified_Bacteria	unclassified_Bacteria
ASV_1458	0	0	0	0	0	0	0	0	0	0	0	0	0	0	0	0	0	0	0	0	0	0	0	0	0	0	0	0	0	Bacteria	Proteobacteria	Betaproteobacteria	Burkholderiales	Comamonadaceae	unclassified_Comamonadaceae
ASV_1459	0	0	0	0	0	0	0	0	0	0	0	0	0	0	0	0	0	0	0	0	5	0	1	0	0	0	0	0	0	Bacteria	Proteobacteria	Alphaproteobacteria	Alphaproteobacteria_incertae_sedis	Geminicoccus	Geminicoccus
ASV_1461	0	0	0	0	0	0	0	0	0	0	0	0	0	0	9	0	0	0	0	0	0	0	0	0	0	0	0	0	0	Bacteria	Proteobacteria	Alphaproteobacteria	Rhizobiales	unclassified_Rhizobiales	unclassified_Rhizobiales
ASV_1463	0	0	0	0	0	0	0	0	0	0	0	0	0	0	4	0	0	0	0	0	0	0	0	0	0	0	0	2	3	Bacteria	Proteobacteria	Gammaproteobacteria	Legionellales	Legionellaceae	Legionella
ASV_1464	0	0	0	0	0	0	0	0	0	0	0	0	0	0	0	0	0	0	0	0	0	0	0	0	0	0	0	0	0	Bacteria	Actinobacteria	Actinobacteria	Solirubrobacterales	Conexibacteraceae	Conexibacter
ASV_1466	0	0	0	0	0	0	0	0	0	0	0	0	0	0	0	9	0	0	0	0	0	0	0	0	0	0	0	0	0	Bacteria	unclassified_Bacteria	unclassified_Bacteria	unclassified_Bacteria	unclassified_Bacteria	unclassified_Bacteria
ASV_1468	0	0	0	0	0	0	0	0	0	0	0	0	0	0	0	9	0	0	0	0	0	0	0	0	0	0	0	0	0	Bacteria	Firmicutes	Bacilli	Bacillales	Bacillales_Incertae Sedis XII	Exiguobacterium
ASV_1469	0	0	0	0	0	0	0	0	0	0	0	0	0	0	0	0	9	0	0	0	0	0	0	0	0	0	0	0	0	Bacteria	Proteobacteria	Alphaproteobacteria	Rhizobiales	Hyphomicrobiaceae	Devosia
ASV_1470	0	0	0	0	0	0	0	0	0	0	0	0	0	0	0	0	2	0	0	7	0	0	0	0	0	0	0	0	0	Bacteria	unclassified_Bacteria	unclassified_Bacteria	unclassified_Bacteria	unclassified_Bacteria	unclassified_Bacteria
ASV_1471	0	0	0	0	0	0	0	0	0	0	0	0	0	0	0	0	1	0	0	2	0	6	0	0	0	0	0	0	0	Bacteria	unclassified_Bacteria	unclassified_Bacteria	unclassified_Bacteria	unclassified_Bacteria	unclassified_Bacteria
ASV_1472	0	0	0	0	0	0	0	0	0	0	0	0	0	0	0	0	0	9	0	0	0	0	0	0	0	0	0	0	0	Bacteria	Actinobacteria	Actinobacteria	Acidimicrobiales	Acidimicrobiaceae	Ilumatobacter
ASV_1473	0	0	0	0	0	0	0	0	0	0	0	0	0	0	0	0	0	9	0	0	0	0	0	0	0	0	0	0	0	Bacteria	Acidobacteria	Acidobacteria_Gp6	Gp6	Gp6	Gp6
ASV_1474	0	0	0	0	0	0	0	0	0	0	0	0	0	0	0	0	0	0	9	0	0	0	0	0	0	0	0	0	0	Bacteria	Actinobacteria	Actinobacteria	Actinomycetales	unclassified_Actinomycetales	unclassified_Actinomycetales
ASV_1475	0	0	0	0	0	0	0	0	0	0	0	0	0	0	0	0	0	0	9	0	0	0	0	0	0	0	0	0	0	Bacteria	unclassified_Bacteria	unclassified_Bacteria	unclassified_Bacteria	unclassified_Bacteria	unclassified_Bacteria
ASV_1476	0	0	0	0	0	0	0	0	0	0	0	0	0	0	0	0	0	0	0	0	9	0	0	0	0	0	0	0	0	Bacteria	Proteobacteria	Betaproteobacteria	Burkholderiales	Comamonadaceae	unclassified_Comamonadaceae
ASV_1477	0	0	0	0	0	0	0	0	0	0	0	0	0	0	0	0	0	0	0	0	0	0	9	0	0	0	0	0	0	Bacteria	Actinobacteria	Actinobacteria	Actinomycetales	Micromonosporaceae	unclassified_Micromonosporaceae
ASV_1478	0	0	0	0	0	0	0	0	0	0	0	0	0	0	0	0	0	0	0	0	0	0	0	9	0	0	0	0	0	Bacteria	Chloroflexi	Thermomicrobia	Sphaerobacterales	Sphaerobacteraceae	unclassified_Sphaerobacteraceae
ASV_1480	0	0	0	0	0	0	0	0	0	0	0	0	0	0	0	0	0	0	0	0	0	0	0	0	0	6	0	3	0	Bacteria	Proteobacteria	Betaproteobacteria	Burkholderiales	Oxalobacteraceae	unclassified_Oxalobacteraceae
ASV_1481	0	0	0	0	0	0	0	0	0	0	0	0	0	0	0	0	0	0	0	0	0	0	0	0	0	0	9	0	0	Bacteria	Proteobacteria	Alphaproteobacteria	Sphingomonadales	Sphingomonadaceae	Sphingobium
ASV_1482	0	0	0	0	0	0	0	0	0	0	0	0	0	0	0	0	0	0	0	0	0	0	0	0	0	0	0	9	0	Bacteria	Acidobacteria	Acidobacteria_Gp4	Aridibacter	Aridibacter	Aridibacter
ASV_1483	0	0	0	0	0	0	0	0	0	0	0	0	0	0	0	0	0	0	0	0	0	0	0	0	0	0	0	9	0	Bacteria	Proteobacteria	Gammaproteobacteria	Pseudomonadales	Pseudomonadaceae	Pseudomonas
ASV_1484	0	0	0	0	0	0	0	0	0	0	0	0	0	0	0	0	0	0	0	0	0	0	0	0	0	0	0	9	0	Bacteria	Actinobacteria	unclassified_Actinobacteria	unclassified_Actinobacteria	unclassified_Actinobacteria	unclassified_Actinobacteria
ASV_1485	0	0	0	0	0	0	0	0	0	0	0	0	0	0	0	0	0	0	0	0	0	0	0	0	0	0	0	0	9	Bacteria	Actinobacteria	Actinobacteria	Solirubrobacterales	unclassified_Solirubrobacterales	unclassified_Solirubrobacterales
ASV_1486	0	8	0	0	0	0	0	0	0	0	0	0	0	0	0	0	0	0	0	0	0	0	0	0	0	0	0	0	0	Bacteria	Bacteroidetes	Flavobacteriia	Flavobacteriales	Flavobacteriaceae	Flavobacterium
ASV_1487	0	1	0	1	0	0	0	0	0	0	0	0	0	0	0	0	0	0	0	0	0	0	0	0	0	0	1	0	0	Bacteria	Bacteroidetes	Sphingobacteriia	Sphingobacteriales	Sphingobacteriaceae	Pedobacter
ASV_1488	0	0	0	2	0	0	0	0	0	0	0	0	0	0	0	0	0	0	0	0	0	0	0	0	0	2	1	3	0	Bacteria	Deinococcus-Thermus	Deinococci	Deinococcales	Deinococcaceae	Deinococcus
ASV_1489	0	0	0	0	0	0	0	8	0	0	0	0	0	0	0	0	0	0	0	0	0	0	0	0	0	0	0	0	0	Bacteria	Chloroflexi	Thermomicrobia	Sphaerobacterales	Sphaerobacteraceae	unclassified_Sphaerobacteraceae
ASV_1491	0	0	0	0	0	0	0	8	0	0	0	0	0	0	0	0	0	0	0	0	0	0	0	0	0	0	0	0	0	Bacteria	Proteobacteria	Betaproteobacteria	Burkholderiales	Oxalobacteraceae	Massilia
ASV_1494	0	0	0	0	0	0	0	8	0	0	0	0	0	0	0	0	0	0	0	0	0	0	0	0	0	0	0	0	0	Bacteria	Bacteroidetes	Cytophagia	Cytophagales	Cytophagaceae	Hymenobacter
ASV_1495	0	0	0	0	0	0	0	4	0	0	0	0	0	0	0	0	0	0	3	0	0	0	0	0	0	0	0	1	0	Bacteria	Firmicutes	Bacilli	Bacillales	Thermoactinomycetaceae 1	Thermoflavimicrobium
ASV_1500	0	0	0	0	0	0	0	0	3	0	0	0	0	5	0	0	0	0	0	0	0	0	0	0	0	0	0	0	0	Bacteria	Firmicutes	Clostridia	Clostridiales	Clostridiales_Incertae Sedis XI	Anaerococcus
ASV_1501	0	0	0	0	0	0	0	0	0	8	0	0	0	0	0	0	0	0	0	0	0	0	0	0	0	0	0	0	0	Bacteria	Actinobacteria	Actinobacteria	Actinomycetales	Micromonosporaceae	unclassified_Micromonosporaceae
ASV_1502	0	0	0	0	0	0	0	0	0	8	0	0	0	0	0	0	0	0	0	0	0	0	0	0	0	0	0	0	0	Bacteria	unclassified_Bacteria	unclassified_Bacteria	unclassified_Bacteria	unclassified_Bacteria	unclassified_Bacteria
ASV_1503	0	0	0	0	0	0	0	0	0	8	0	0	0	0	0	0	0	0	0	0	0	0	0	0	0	0	0	0	0	Bacteria	Bacteroidetes	Bacteroidia	Bacteroidales	Prevotellaceae	Prevotella
ASV_1504	0	0	0	0	0	0	0	0	0	8	0	0	0	0	0	0	0	0	0	0	0	0	0	0	0	0	0	0	0	Bacteria	Actinobacteria	Actinobacteria	Actinomycetales	unclassified_Actinomycetales	unclassified_Actinomycetales
ASV_1506	0	0	0	0	0	0	0	0	0	0	8	0	0	0	0	0	0	0	0	0	0	0	0	0	0	0	0	0	0	Bacteria	Chloroflexi	Ktedonobacteria	Ktedonobacterales	Ktedonobacteraceae	Ktedonobacter
ASV_1507	0	0	0	0	0	0	0	0	0	0	8	0	0	0	0	0	0	0	0	0	0	0	0	0	0	0	0	0	0	Bacteria	Actinobacteria	Actinobacteria	Solirubrobacterales	Patulibacteraceae	Patulibacter
ASV_1508	0	0	0	0	0	0	0	0	0	0	8	0	0	0	0	0	0	0	0	0	0	0	0	0	0	0	0	0	0	Bacteria	Firmicutes	Bacilli	Bacillales	Paenibacillaceae 1	unclassified_Paenibacillaceae 1
ASV_1509	0	0	0	0	0	0	0	0	0	0	8	0	0	0	0	0	0	0	0	0	0	0	0	0	0	0	0	0	0	Bacteria	Proteobacteria	Gammaproteobacteria	Xanthomonadales	Xanthomonadaceae	Stenotrophomonas
ASV_1510	0	0	0	0	0	0	0	0	0	0	8	0	0	0	0	0	0	0	0	0	0	0	0	0	0	0	0	0	0	Bacteria	Firmicutes	Bacilli	Bacillales	Paenibacillaceae 1	Brevibacillus
ASV_1511	0	0	0	0	0	0	0	0	0	0	0	8	0	0	0	0	0	0	0	0	0	0	0	0	0	0	0	0	0	Bacteria	Acidobacteria	Acidobacteria_Gp6	Gp6	Gp6	Gp6
ASV_1512	0	0	0	0	0	0	0	0	0	0	0	8	0	0	0	0	0	0	0	0	0	0	0	0	0	0	0	0	0	Bacteria	Actinobacteria	Actinobacteria	Solirubrobacterales	Conexibacteraceae	Conexibacter
ASV_1515	0	0	0	0	0	0	0	0	0	0	0	5	0	0	0	0	0	0	0	0	0	0	0	0	0	0	0	0	3	Bacteria	Firmicutes	Bacilli	Lactobacillales	Aerococcaceae	Aerococcus
ASV_1516	0	0	0	0	0	0	0	0	0	0	0	0	0	0	0	0	0	0	0	0	0	0	0	0	0	0	0	0	0	Bacteria	Proteobacteria	Gammaproteobacteria	Pseudomonadales	Moraxellaceae	Acinetobacter
ASV_1517	0	0	0	0	0	0	0	0	0	0	0	0	0	0	0	0	0	0	0	0	0	0	0	0	0	0	0	0	0	Bacteria	Actinobacteria	Actinobacteria	unclassified_Actinobacteria	unclassified_Actinobacteria	unclassified_Actinobacteria
ASV_1518	0	0	0	0	0	0	0	0	0	0	0	0	0	0	0	0	0	0	0	0	0	0	0	0	0	0	0	0	0	Bacteria	Acidobacteria	Acidobacteria_Gp1	Terriglobus	Terriglobus	Terriglobus
ASV_1524	0	0	0	0	0	0	0	0	0	0	0	0	0	8	0	0	0	0	0	0	0	0	0	0	0	0	0	0	0	Bacteria	Actinobacteria	Actinobacteria	Rubrobacterales	Rubrobacteraceae	Rubrobacter
ASV_1525	0	0	0	0	0	0	0	0	0	0	0	0	0	8	0	0	0	0	0	0	0	0	0	0	0	0	0	0	0	Bacteria	unclassified_Bacteria	unclassified_Bacteria	unclassified_Bacteria	unclassified_Bacteria	unclassified_Bacteria
ASV_1526	0	0	0	0	0	0	0	0	0	0	0	0	0	8	0	0	0	0	0	0	0	0	0	0	0	0	0	0	0	Bacteria	Actinobacteria	Actinobacteria	Solirubrobacterales	unclassified_Solirubrobacterales	unclassified_Solirubrobacterales
ASV_1527	0	0	0	0	0	0	0	0	0	0	0	0	0	0	0	0	0	0	0	0	0	0	0	0	0	0	0	0	0	Bacteria	Proteobacteria	Deltaproteobacteria	Myxococcales	unclassified_Myxococcales	unclassified_Myxococcales
ASV_1531	0	0	0	0	0	0	0	0	0	0	0	0	0	0	0	0	0	0	0	0	0	0	0	0	0	0	0	0	0	Bacteria	Firmicutes	Clostridia	Clostridiales	Clostridiaceae 1	Clostridium sensu stricto
ASV_1532	0	0	0	0	0	0	0	0	0	0	0	0	0	0	8	0	0	0	0	0	0	0	0	0	0	0	0	0	0	Bacteria	Firmicutes	Bacilli	Bacillales	Paenibacillaceae 1	Paenibacillus
ASV_1534	0	0	0	0	0	0	0	0	0	0	0	0	0	0	8	0	0	0	0	0	0	0	0	0	0	0	0	0	0	Bacteria	Firmicutes	Bacilli	Lactobacillales	Lactobacillaceae	Lactobacillus
ASV_1535	0	0	0	0	0	0	0	0	0	0	0	0	0	0	8	0	0	0	0	0	0	0	0	0	0	0	0	0	0	Bacteria	Actinobacteria	Actinobacteria	Actinomycetales	Nocardioidaceae	Nocardioides
ASV_1536	0	0	0	0	0	0	0	0	0	0	0	0	0	0	8	0	0	0	0	0	0	0	0	0	0	0	0	0	0	Bacteria	Planctomycetes	Planctomycetia	Planctomycetales	Planctomycetaceae	unclassified_Planctomycetaceae
ASV_1537	0	0	0	0	0	0	0	0	0	0	0	0	0	0	0	0	0	0	0	0	0	0	0	0	0	0	0	0	0	Bacteria	Proteobacteria	Alphaproteobacteria	Sphingomonadales	Sphingomonadaceae	unclassified_Sphingomonadaceae
ASV_1538	0	0	0	0	0	0	0	0	0	0	0	0	0	0	0	0	0	0	0	0	0	0	0	0	0	0	0	0	0	Bacteria	unclassified_Bacteria	unclassified_Bacteria	unclassified_Bacteria	unclassified_Bacteria	unclassified_Bacteria
ASV_1540	0	0	0	0	0	0	0	0	0	0	0	0	0	0	0	0	0	0	0	0	0	0	0	0	0	0	0	0	0	Bacteria	Proteobacteria	Betaproteobacteria	Burkholderiales	Alcaligenaceae	Pigmentiphaga
ASV_1541	0	0	0	0	0	0	0	0	0	0	0	0	0	0	0	8	0	0	0	0	0	0	0	0	0	0	0	0	0	Bacteria	Planctomycetes	Planctomycetia	Planctomycetales	Planctomycetaceae	unclassified_Planctomycetaceae
ASV_1542	0	0	0	0	0	0	0	0	0	0	0	0	0	0	0	8	0	0	0	0	0	0	0	0	0	0	0	0	0	Bacteria	Proteobacteria	Betaproteobacteria	Burkholderiales	Oxalobacteraceae	Noviherbaspirillum
ASV_1543	0	0	0	0	0	0	0	0	0	0	0	0	0	0	0	8	0	0	0	0	0	0	0	0	0	0	0	0	0	Bacteria	Actinobacteria	unclassified_Actinobacteria	unclassified_Actinobacteria	unclassified_Actinobacteria	unclassified_Actinobacteria
ASV_1544	0	0	0	0	0	0	0	0	0	0	0	0	0	0	0	8	0	0	0	0	0	0	0	0	0	0	0	0	0	Bacteria	Actinobacteria	Actinobacteria	Solirubrobacterales	unclassified_Solirubrobacterales	unclassified_Solirubrobacterales
ASV_1545	0	0	0	0	0	0	0	0	0	0	0	0	0	0	0	8	0	0	0	0	0	0	0	0	0	0	0	0	0	Bacteria	Actinobacteria	Actinobacteria	Solirubrobacterales	Conexibacteraceae	Conexibacter
ASV_1547	0	0	0	0	0	0	0	0	0	0	0	0	0	0	0	0	8	0	0	0	0	0	0	0	0	0	0	0	0	Bacteria	unclassified_Bacteria	unclassified_Bacteria	unclassified_Bacteria	unclassified_Bacteria	unclassified_Bacteria
ASV_1548	0	0	0	0	0	0	0	0	0	0	0	0	0	0	0	0	8	0	0	0	0	0	0	0	0	0	0	0	0	Bacteria	Gemmatimonadetes	Gemmatimonadetes	Gemmatimonadales	Gemmatimonadaceae	Gemmatimonas
ASV_1549	0	0	0	0	0	0	0	0	0	0	0	0	0	0	0	0	0	8	0	0	0	0	0	0	0	0	0	0	0	Bacteria	Bacteroidetes	Flavobacteriia	Flavobacteriales	Flavobacteriaceae	Flavobacterium
ASV_1550	0	0	0	0	0	0	0	0	0	0	0	0	0	0	0	0	0	8	0	0	0	0	0	0	0	0	0	0	0	Bacteria	Firmicutes	Bacilli	Bacillales	Paenibacillaceae 1	Paenibacillus
ASV_1551	0	0	0	0	0	0	0	0	0	0	0	0	0	0	0	0	0	8	0	0	0	0	0	0	0	0	0	0	0	Bacteria	Actinobacteria	Actinobacteria	Gaiellales	Gaiellaceae	Gaiella
ASV_1552	0	0	0	0	0	0	0	0	0	0	0	0	0	0	0	0	0	8	0	0	0	0	0	0	0	0	0	0	0	Bacteria	Proteobacteria	Deltaproteobacteria	Myxococcales	unclassified_Myxococcales	unclassified_Myxococcales
ASV_1553	0	0	0	0	0	0	0	0	0	0	0	0	0	0	0	0	0	0	0	1	5	0	0	0	0	0	0	2	0	Bacteria	Acidobacteria	Acidobacteria_Gp1	Gp1	Gp1	Gp1
ASV_1554	0	0	0	0	0	0	0	0	0	0	0	0	0	0	0	0	0	0	0	0	8	0	0	0	0	0	0	0	0	Bacteria	Proteobacteria	Betaproteobacteria	Burkholderiales	Comamonadaceae	unclassified_Comamonadaceae
ASV_1555	0	0	0	0	0	0	0	0	0	0	0	0	0	0	0	0	0	0	0	0	8	0	0	0	0	0	0	0	0	Bacteria	unclassified_Bacteria	unclassified_Bacteria	unclassified_Bacteria	unclassified_Bacteria	unclassified_Bacteria
ASV_1556	0	0	0	0	0	0	0	0	0	0	0	0	0	0	0	0	0	0	0	0	2	0	0	0	0	3	1	2	0	Bacteria	Actinobacteria	Actinobacteria	Solirubrobacterales	Conexibacteraceae	Conexibacter
ASV_1557	0	0	0	0	0	0	0	0	0	0	0	0	0	0	0	0	0	0	0	0	0	8	0	0	0	0	0	0	0	Bacteria	Proteobacteria	Alphaproteobacteria	Caulobacterales	Caulobacteraceae	Brevundimonas
ASV_1558	0	0	0	0	0	0	0	0	0	0	0	0	0	0	0	0	0	0	0	0	0	0	0	0	0	8	0	0	0	Bacteria	Candidatus Saccharibacteria	Saccharibacteria_genera_incertae_sedis	Saccharibacteria_genera_incertae_sedis	Saccharibacteria_genera_incertae_sedis	Saccharibacteria_genera_incertae_sedis
ASV_1559	0	0	0	0	0	0	0	0	0	0	0	0	0	0	0	0	0	0	0	0	0	0	0	0	0	8	0	0	0	Bacteria	Actinobacteria	Actinobacteria	unclassified_Actinobacteria	unclassified_Actinobacteria	unclassified_Actinobacteria
ASV_1560	0	0	0	0	0	0	0	0	0	0	0	0	0	0	0	0	0	0	0	0	0	0	0	0	0	0	8	0	0	Bacteria	Proteobacteria	Alphaproteobacteria	Sphingomonadales	Sphingomonadaceae	unclassified_Sphingomonadaceae
ASV_1561	0	0	0	0	0	0	0	0	0	0	0	0	0	0	0	0	0	0	0	0	0	0	0	0	0	0	8	0	0	Bacteria	unclassified_Bacteria	unclassified_Bacteria	unclassified_Bacteria	unclassified_Bacteria	unclassified_Bacteria
ASV_1562	0	0	0	0	0	0	0	0	0	0	0	0	0	0	0	0	0	0	0	0	0	0	0	0	0	0	8	0	0	Bacteria	Actinobacteria	Actinobacteria	Actinomycetales	Micromonosporaceae	unclassified_Micromonosporaceae
ASV_1563	0	0	0	0	0	0	0	0	0	0	0	0	0	0	0	0	0	0	0	0	0	0	0	0	0	0	0	8	0	Bacteria	Acidobacteria	Acidobacteria_Gp6	Gp6	Gp6	Gp6
ASV_1564	0	0	0	0	0	0	0	0	0	0	0	0	0	0	0	0	0	0	0	0	0	0	0	0	0	0	0	8	0	Bacteria	Proteobacteria	Alphaproteobacteria	Rhizobiales	unclassified_Rhizobiales	unclassified_Rhizobiales
ASV_1565	0	0	0	0	0	0	0	0	0	0	0	0	0	0	0	0	0	0	0	0	0	0	0	0	0	0	0	8	0	Bacteria	Verrucomicrobia	Verrucomicrobiae	Verrucomicrobiales	Verrucomicrobiaceae	Luteolibacter
ASV_1566	0	0	0	0	0	0	0	0	0	0	0	0	0	0	0	0	0	0	0	0	0	0	0	0	0	0	0	0	8	Bacteria	Actinobacteria	Actinobacteria	Acidimicrobiales	unclassified_Acidimicrobiales	unclassified_Acidimicrobiales
ASV_1567	1	2	0	0	0	0	0	0	0	0	0	0	0	0	0	0	0	0	0	0	0	0	0	0	0	0	1	0	3	Bacteria	Bacteroidetes	Sphingobacteriia	Sphingobacteriales	Sphingobacteriaceae	Pedobacter
ASV_1568	1	3	0	0	0	0	0	0	0	0	0	0	0	0	0	0	0	0	0	0	0	0	0	0	0	0	2	0	1	Bacteria	Bacteroidetes	Sphingobacteriia	Sphingobacteriales	Sphingobacteriaceae	Pedobacter
ASV_1569	0	0	0	7	0	0	0	0	0	0	0	0	0	0	0	0	0	0	0	0	0	0	0	0	0	0	0	0	0	Bacteria	Bacteroidetes	Sphingobacteriia	Sphingobacteriales	Sphingobacteriaceae	Pedobacter
ASV_1570	0	0	0	7	0	0	0	0	0	0	0	0	0	0	0	0	0	0	0	0	0	0	0	0	0	0	0	0	0	Bacteria	Bacteroidetes	Sphingobacteriia	Sphingobacteriales	Sphingobacteriaceae	unclassified_Sphingobacteriaceae
ASV_1571	0	0	0	7	0	0	0	0	0	0	0	0	0	0	0	0	0	0	0	0	0	0	0	0	0	0	0	0	0	Bacteria	Proteobacteria	Alphaproteobacteria	Sphingomonadales	Sphingomonadaceae	unclassified_Sphingomonadaceae
ASV_1574	0	0	0	0	0	0	0	0	0	0	0	0	0	0	0	0	0	0	0	0	0	0	0	0	0	0	0	0	0	Bacteria	Actinobacteria	Actinobacteria	Solirubrobacterales	unclassified_Solirubrobacterales	unclassified_Solirubrobacterales
ASV_1576	0	0	0	0	0	0	0	0	0	0	0	0	0	0	0	0	0	0	0	0	0	0	0	0	0	0	0	0	0	Bacteria	Proteobacteria	Gammaproteobacteria	Pseudomonadales	Moraxellaceae	Acinetobacter
ASV_1581	0	0	0	0	0	0	0	0	0	7	0	0	0	0	0	0	0	0	0	0	0	0	0	0	0	0	0	0	0	Bacteria	unclassified_Bacteria	unclassified_Bacteria	unclassified_Bacteria	unclassified_Bacteria	unclassified_Bacteria
ASV_1582	0	0	0	0	0	0	0	0	0	7	0	0	0	0	0	0	0	0	0	0	0	0	0	0	0	0	0	0	0	Bacteria	Actinobacteria	Actinobacteria	Actinomycetales	Propionibacteriaceae	Friedmanniella
ASV_1583	0	0	0	0	0	0	0	0	0	7	0	0	0	0	0	0	0	0	0	0	0	0	0	0	0	0	0	0	0	Bacteria	Proteobacteria	Alphaproteobacteria	Rhodospirillales	Acetobacteraceae	unclassified_Acetobacteraceae
ASV_1584	0	0	0	0	0	0	0	0	0	7	0	0	0	0	0	0	0	0	0	0	0	0	0	0	0	0	0	0	0	Bacteria	Actinobacteria	unclassified_Actinobacteria	unclassified_Actinobacteria	unclassified_Actinobacteria	unclassified_Actinobacteria
ASV_1585	0	0	0	0	0	0	0	0	0	7	0	0	0	0	0	0	0	0	0	0	0	0	0	0	0	0	0	0	0	Bacteria	Proteobacteria	Alphaproteobacteria	Sphingomonadales	Sphingomonadaceae	Novosphingobium
ASV_1588	0	0	0	0	0	0	0	0	0	0	0	7	0	0	0	0	0	0	0	0	0	0	0	0	0	0	0	0	0	Bacteria	Actinobacteria	Actinobacteria	unclassified_Actinobacteria	unclassified_Actinobacteria	unclassified_Actinobacteria
ASV_1589	0	0	0	0	0	0	0	0	0	0	0	7	0	0	0	0	0	0	0	0	0	0	0	0	0	0	0	0	0	Bacteria	Proteobacteria	Betaproteobacteria	unclassified_Betaproteobacteria	unclassified_Betaproteobacteria	unclassified_Betaproteobacteria
ASV_1590	0	0	0	0	0	0	0	0	0	0	0	7	0	0	0	0	0	0	0	0	0	0	0	0	0	0	0	0	0	Bacteria	Actinobacteria	Actinobacteria	Actinomycetales	Intrasporangiaceae	Ornithinimicrobium
ASV_1594	0	0	0	0	0	0	0	0	0	0	0	0	0	0	0	0	0	0	0	0	0	0	0	0	0	0	0	0	0	Bacteria	Firmicutes	Clostridia	Clostridiales	Gracilibacteraceae	Gracilibacter
ASV_1595	0	0	0	0	0	0	0	0	0	0	0	0	0	0	0	0	0	0	0	0	0	0	0	0	0	0	0	0	0	Bacteria	Actinobacteria	Actinobacteria	Actinomycetales	Propionibacteriaceae	Friedmanniella
ASV_1598	0	0	0	0	0	0	0	0	0	0	0	0	0	0	0	0	0	0	0	0	0	0	0	0	0	0	0	0	0	Bacteria	Proteobacteria	Alphaproteobacteria	unclassified_Alphaproteobacteria	unclassified_Alphaproteobacteria	unclassified_Alphaproteobacteria
ASV_1604	0	0	0	0	0	0	0	0	0	0	0	0	0	0	0	0	0	0	0	0	0	0	0	0	0	0	0	0	0	Bacteria	Proteobacteria	Gammaproteobacteria	Enterobacteriales	Enterobacteriaceae	Escherichia/Shigella
ASV_1607	0	0	0	0	0	0	0	0	0	0	0	0	0	0	0	0	0	0	0	0	0	0	0	0	0	0	0	0	0	Bacteria	unclassified_Bacteria	unclassified_Bacteria	unclassified_Bacteria	unclassified_Bacteria	unclassified_Bacteria
ASV_1608	0	0	0	0	0	0	0	0	0	0	0	0	0	0	0	0	0	0	0	0	0	0	0	0	0	0	0	0	0	Bacteria	Actinobacteria	Actinobacteria	Actinomycetales	Nocardioidaceae	Nocardioides
ASV_1609	0	0	0	0	0	0	0	0	0	0	0	0	7	0	0	0	0	0	0	0	0	0	0	0	0	0	0	0	0	Bacteria	Bacteroidetes	Cytophagia	Cytophagales	Cytophagaceae	Hymenobacter
ASV_1612	0	0	0	0	0	0	0	0	0	0	0	0	0	7	0	0	0	0	0	0	0	0	0	0	0	0	0	0	0	Bacteria	Proteobacteria	Alphaproteobacteria	Rhizobiales	unclassified_Rhizobiales	unclassified_Rhizobiales
ASV_1613	0	0	0	0	0	0	0	0	0	0	0	0	0	7	0	0	0	0	0	0	0	0	0	0	0	0	0	0	0	Bacteria	Proteobacteria	Betaproteobacteria	Burkholderiales	Oxalobacteraceae	Massilia
ASV_1614	0	0	0	0	0	0	0	0	0	0	0	0	0	7	0	0	0	0	0	0	0	0	0	0	0	0	0	0	0	Bacteria	Proteobacteria	Deltaproteobacteria	Myxococcales	unclassified_Myxococcales	unclassified_Myxococcales
ASV_1616	0	0	0	0	0	0	0	0	0	0	0	0	0	7	0	0	0	0	0	0	0	0	0	0	0	0	0	0	0	Bacteria	Firmicutes	Bacilli	Bacillales	Planococcaceae	unclassified_Planococcaceae
ASV_1617	0	0	0	0	0	0	0	0	0	0	0	0	0	7	0	0	0	0	0	0	0	0	0	0	0	0	0	0	0	Bacteria	Actinobacteria	Actinobacteria	Actinomycetales	Mycobacteriaceae	Mycobacterium
ASV_1618	0	0	0	0	0	0	0	0	0	0	0	0	0	7	0	0	0	0	0	0	0	0	0	0	0	0	0	0	0	Bacteria	Proteobacteria	Alphaproteobacteria	Sphingomonadales	Sphingomonadaceae	unclassified_Sphingomonadaceae
ASV_1619	0	0	0	0	0	0	0	0	0	0	0	0	0	0	0	0	0	0	0	0	0	0	0	0	0	0	0	0	0	Bacteria	Actinobacteria	Actinobacteria	Gaiellales	Gaiellaceae	Gaiella
ASV_1621	0	0	0	0	0	0	0	0	0	0	0	0	0	0	0	0	0	0	0	0	0	0	0	0	0	0	0	0	0	Bacteria	Planctomycetes	Planctomycetia	Planctomycetales	Planctomycetaceae	Singulisphaera
ASV_1623	0	0	0	0	0	0	0	0	0	0	0	0	0	0	0	0	0	0	0	0	0	0	0	0	0	0	0	0	0	Bacteria	Actinobacteria	unclassified_Actinobacteria	unclassified_Actinobacteria	unclassified_Actinobacteria	unclassified_Actinobacteria
ASV_1624	0	0	0	0	0	0	0	0	0	0	0	0	0	0	0	0	0	0	0	0	0	0	0	0	0	0	0	0	0	Bacteria	Firmicutes	Bacilli	Lactobacillales	Aerococcaceae	Facklamia
ASV_1625	0	0	0	0	0	0	0	0	0	0	0	0	0	0	0	0	0	0	0	0	0	0	0	0	0	0	0	0	0	Bacteria	Proteobacteria	Alphaproteobacteria	Rhizobiales	unclassified_Rhizobiales	unclassified_Rhizobiales
ASV_1628	0	0	0	0	0	0	0	0	0	0	0	0	0	0	7	0	0	0	0	0	0	0	0	0	0	0	0	0	0	Bacteria	Firmicutes	Bacilli	Bacillales	Thermoactinomycetaceae 1	Shimazuella
ASV_1629	0	0	0	0	0	0	0	0	0	0	0	0	0	0	7	0	0	0	0	0	0	0	0	0	0	0	0	0	0	Bacteria	Proteobacteria	Gammaproteobacteria	Xanthomonadales	Sinobacteraceae	Steroidobacter
ASV_1632	0	0	0	0	0	0	0	0	0	0	0	0	0	0	7	0	0	0	0	0	0	0	0	0	0	0	0	0	0	Bacteria	Actinobacteria	Actinobacteria	Gaiellales	Gaiellaceae	Gaiella
ASV_1633	0	0	0	0	0	0	0	0	0	0	0	0	0	0	0	0	0	0	0	0	0	0	0	0	0	0	0	0	0	Bacteria	Proteobacteria	Betaproteobacteria	Burkholderiales	Comamonadaceae	unclassified_Comamonadaceae
ASV_1634	0	0	0	0	0	0	0	0	0	0	0	0	0	0	0	0	0	0	0	0	0	0	0	0	0	0	0	0	0	Bacteria	Candidatus Saccharibacteria	Saccharibacteria_genera_incertae_sedis	Saccharibacteria_genera_incertae_sedis	Saccharibacteria_genera_incertae_sedis	Saccharibacteria_genera_incertae_sedis
ASV_1635	0	0	0	0	0	0	0	0	0	0	0	0	0	0	0	0	0	0	0	0	0	0	0	0	0	0	0	0	0	Bacteria	Proteobacteria	Gammaproteobacteria	Pseudomonadales	Moraxellaceae	Acinetobacter
ASV_1636	0	0	0	0	0	0	0	0	0	0	0	0	0	0	0	0	0	0	0	0	0	0	0	0	0	0	0	0	0	Bacteria	Proteobacteria	Betaproteobacteria	Burkholderiales	Oxalobacteraceae	Massilia
ASV_1638	0	0	0	0	0	0	0	0	0	0	0	0	0	0	0	7	0	0	0	0	0	0	0	0	0	0	0	0	0	Bacteria	Bacteroidetes	Cytophagia	Cytophagales	Cytophagaceae	Adhaeribacter
ASV_1639	0	0	0	0	0	0	0	0	0	0	0	0	0	0	0	7	0	0	0	0	0	0	0	0	0	0	0	0	0	Bacteria	Actinobacteria	Actinobacteria	Acidimicrobiales	Iamiaceae	Aquihabitans
ASV_1640	0	0	0	0	0	0	0	0	0	0	0	0	0	0	0	7	0	0	0	0	0	0	0	0	0	0	0	0	0	Bacteria	Acidobacteria	Acidobacteria_Gp1	unclassified_Acidobacteria_Gp1	unclassified_Acidobacteria_Gp1	unclassified_Acidobacteria_Gp1
ASV_1641	0	0	0	0	0	0	0	0	0	0	0	0	0	0	0	7	0	0	0	0	0	0	0	0	0	0	0	0	0	Bacteria	Firmicutes	Clostridia	Clostridiales	Clostridiales_Incertae Sedis XI	Anaerococcus
ASV_1643	0	0	0	0	0	0	0	0	0	0	0	0	0	0	0	0	7	0	0	0	0	0	0	0	0	0	0	0	0	Bacteria	Proteobacteria	Betaproteobacteria	unclassified_Betaproteobacteria	unclassified_Betaproteobacteria	unclassified_Betaproteobacteria
ASV_1644	0	0	0	0	0	0	0	0	0	0	0	0	0	0	0	0	2	1	0	0	0	1	0	0	0	3	0	0	0	Bacteria	Actinobacteria	Actinobacteria	Solirubrobacterales	unclassified_Solirubrobacterales	unclassified_Solirubrobacterales
ASV_1645	0	0	0	0	0	0	0	0	0	0	0	0	0	0	0	0	1	0	0	0	0	0	1	0	0	2	0	0	3	Bacteria	unclassified_Bacteria	unclassified_Bacteria	unclassified_Bacteria	unclassified_Bacteria	unclassified_Bacteria
ASV_1647	0	0	0	0	0	0	0	0	0	0	0	0	0	0	0	0	0	0	0	3	0	0	0	0	0	0	0	4	0	Bacteria	Chloroflexi	unclassified_Chloroflexi	unclassified_Chloroflexi	unclassified_Chloroflexi	unclassified_Chloroflexi
ASV_1648	0	0	0	0	0	0	0	0	0	0	0	0	0	0	0	0	0	0	0	0	0	7	0	0	0	0	0	0	0	Bacteria	Proteobacteria	Deltaproteobacteria	Myxococcales	Labilitrichaceae	Labilithrix
ASV_1649	0	0	0	0	0	0	0	0	0	0	0	0	0	0	0	0	0	0	0	0	0	0	7	0	0	0	0	0	0	Bacteria	Proteobacteria	Betaproteobacteria	unclassified_Betaproteobacteria	unclassified_Betaproteobacteria	unclassified_Betaproteobacteria
ASV_1650	0	0	0	0	0	0	0	0	0	0	0	0	0	0	0	0	0	0	0	0	0	0	7	0	0	0	0	0	0	Bacteria	Actinobacteria	Actinobacteria	Actinomycetales	Nocardioidaceae	Nocardioides
ASV_1651	0	0	0	0	0	0	0	0	0	0	0	0	0	0	0	0	0	0	0	0	0	0	7	0	0	0	0	0	0	Bacteria	Actinobacteria	Actinobacteria	Rubrobacterales	Rubrobacteraceae	Rubrobacter
ASV_1652	0	0	0	0	0	0	0	0	0	0	0	0	0	0	0	0	0	0	0	0	0	0	7	0	0	0	0	0	0	Bacteria	Proteobacteria	Betaproteobacteria	Burkholderiales	Oxalobacteraceae	Herbaspirillum
ASV_1653	0	0	0	0	0	0	0	0	0	0	0	0	0	0	0	0	0	0	0	0	0	0	7	0	0	0	0	0	0	Bacteria	Actinobacteria	Actinobacteria	Actinomycetales	Nocardioidaceae	Aeromicrobium
ASV_1654	0	0	0	0	0	0	0	0	0	0	0	0	0	0	0	0	0	0	0	0	0	0	0	0	0	7	0	0	0	Bacteria	Proteobacteria	Betaproteobacteria	Burkholderiales	Oxalobacteraceae	Herbaspirillum
ASV_1655	0	0	0	0	0	0	0	0	0	0	0	0	0	0	0	0	0	0	0	0	0	0	0	0	0	7	0	0	0	Bacteria	Actinobacteria	Actinobacteria	Solirubrobacterales	Conexibacteraceae	Conexibacter
ASV_1656	0	0	0	0	0	0	0	0	0	0	0	0	0	0	0	0	0	0	0	0	0	0	0	0	0	0	0	7	0	Bacteria	Proteobacteria	Gammaproteobacteria	Xanthomonadales	Xanthomonadaceae	Arenimonas
ASV_1657	0	0	0	0	0	0	0	0	0	0	0	0	0	0	0	0	0	0	0	0	0	0	0	0	0	0	0	7	0	Bacteria	Nitrospirae	Nitrospira	Nitrospirales	Nitrospiraceae	Nitrospira
ASV_1658	0	0	0	0	0	0	0	0	0	0	0	0	0	0	0	0	0	0	0	0	0	0	0	0	0	0	0	7	0	Bacteria	Candidatus Saccharibacteria	Saccharibacteria_genera_incertae_sedis	Saccharibacteria_genera_incertae_sedis	Saccharibacteria_genera_incertae_sedis	Saccharibacteria_genera_incertae_sedis
ASV_1659	0	0	0	0	0	0	0	0	0	0	0	0	0	0	0	0	0	0	0	0	0	0	0	0	0	0	0	0	7	Bacteria	Verrucomicrobia	Spartobacteria	Spartobacteria_genera_incertae_sedis	Spartobacteria_genera_incertae_sedis	Spartobacteria_genera_incertae_sedis
ASV_1660	3	0	0	3	0	0	0	0	0	0	0	0	0	0	0	0	0	0	0	0	0	0	0	0	0	0	0	0	0	Bacteria	Firmicutes	Bacilli	Bacillales	Paenibacillaceae 1	Paenibacillus
ASV_1661	0	6	0	0	0	0	0	0	0	0	0	0	0	0	0	0	0	0	0	0	0	0	0	0	0	0	0	0	0	Bacteria	Bacteroidetes	Sphingobacteriia	Sphingobacteriales	Sphingobacteriaceae	Pedobacter
ASV_1664	0	0	0	0	0	0	0	0	0	0	0	0	0	0	0	0	0	0	0	0	0	0	0	0	0	0	0	0	0	Bacteria	Bacteroidetes	Cytophagia	Cytophagales	Cytophagaceae	Dyadobacter
ASV_1667	0	0	0	0	0	0	0	0	0	0	0	0	0	0	0	0	0	0	0	0	0	0	0	0	0	0	0	0	0	Bacteria	Actinobacteria	Actinobacteria	Actinomycetales	Kineosporiaceae	Kineococcus
ASV_1668	0	0	0	0	0	0	0	0	0	0	0	0	0	0	0	0	0	0	0	0	0	0	0	0	0	0	0	0	0	Bacteria	Proteobacteria	Gammaproteobacteria	Pseudomonadales	Moraxellaceae	Acinetobacter
ASV_1670	0	0	0	0	0	0	0	6	0	0	0	0	0	0	0	0	0	0	0	0	0	0	0	0	0	0	0	0	0	Bacteria	Proteobacteria	Betaproteobacteria	Burkholderiales	Oxalobacteraceae	Massilia
ASV_1671	0	0	0	0	0	0	0	6	0	0	0	0	0	0	0	0	0	0	0	0	0	0	0	0	0	0	0	0	0	Bacteria	Bacteroidetes	Flavobacteriia	Flavobacteriales	Flavobacteriaceae	Cloacibacterium
ASV_1673	0	0	0	0	0	0	0	0	0	0	0	0	0	0	0	0	0	0	0	0	0	0	0	0	0	0	0	0	0	Bacteria	Proteobacteria	Alphaproteobacteria	Rhizobiales	unclassified_Rhizobiales	unclassified_Rhizobiales
ASV_1676	0	0	0	0	0	0	0	0	6	0	0	0	0	0	0	0	0	0	0	0	0	0	0	0	0	0	0	0	0	Bacteria	Actinobacteria	Actinobacteria	Actinomycetales	Nocardioidaceae	Nocardioides
ASV_1677	0	0	0	0	0	0	0	0	0	6	0	0	0	0	0	0	0	0	0	0	0	0	0	0	0	0	0	0	0	Bacteria	Actinobacteria	Actinobacteria	Actinomycetales	Micromonosporaceae	unclassified_Micromonosporaceae
ASV_1680	0	0	0	0	0	0	0	0	0	6	0	0	0	0	0	0	0	0	0	0	0	0	0	0	0	0	0	0	0	Bacteria	Verrucomicrobia	Spartobacteria	Spartobacteria_genera_incertae_sedis	Spartobacteria_genera_incertae_sedis	Spartobacteria_genera_incertae_sedis
ASV_1681	0	0	0	0	0	0	0	0	0	0	6	0	0	0	0	0	0	0	0	0	0	0	0	0	0	0	0	0	0	Bacteria	Actinobacteria	unclassified_Actinobacteria	unclassified_Actinobacteria	unclassified_Actinobacteria	unclassified_Actinobacteria
ASV_1682	0	0	0	0	0	0	0	0	0	0	6	0	0	0	0	0	0	0	0	0	0	0	0	0	0	0	0	0	0	Bacteria	Actinobacteria	Actinobacteria	Actinomycetales	Micromonosporaceae	unclassified_Micromonosporaceae
ASV_1686	0	0	0	0	0	0	0	0	0	0	0	6	0	0	0	0	0	0	0	0	0	0	0	0	0	0	0	0	0	Bacteria	Actinobacteria	Actinobacteria	Actinomycetales	Nocardioidaceae	unclassified_Nocardioidaceae
ASV_1687	0	0	0	0	0	0	0	0	0	0	0	6	0	0	0	0	0	0	0	0	0	0	0	0	0	0	0	0	0	Bacteria	Acidobacteria	Acidobacteria_Gp6	Gp6	Gp6	Gp6
ASV_1688	0	0	0	0	0	0	0	0	0	0	0	6	0	0	0	0	0	0	0	0	0	0	0	0	0	0	0	0	0	Bacteria	Proteobacteria	Betaproteobacteria	Burkholderiales	unclassified_Burkholderiales	unclassified_Burkholderiales
ASV_1689	0	0	0	0	0	0	0	0	0	0	0	6	0	0	0	0	0	0	0	0	0	0	0	0	0	0	0	0	0	Bacteria	Acidobacteria	Acidobacteria_Gp6	Gp6	Gp6	Gp6
ASV_1690	0	0	0	0	0	0	0	0	0	0	0	6	0	0	0	0	0	0	0	0	0	0	0	0	0	0	0	0	0	Bacteria	Actinobacteria	Actinobacteria	Actinomycetales	Micrococcaceae	Kocuria
ASV_1693	0	0	0	0	0	0	0	0	0	0	0	0	0	0	0	0	0	0	0	0	0	0	0	0	0	0	0	0	0	Bacteria	Actinobacteria	Actinobacteria	Actinomycetales	Pseudonocardiaceae	Pseudonocardia
ASV_1694	0	0	0	0	0	0	0	0	0	0	0	0	0	0	0	0	0	0	0	0	0	0	0	0	0	0	0	0	0	Bacteria	Proteobacteria	Betaproteobacteria	Burkholderiales	Comamonadaceae	unclassified_Comamonadaceae
ASV_1695	0	0	0	0	0	0	0	0	0	0	0	0	0	0	0	0	0	0	0	0	0	0	0	0	0	0	0	0	0	Bacteria	Firmicutes	Bacilli	Bacillales	Thermoactinomycetaceae 1	Shimazuella
ASV_1696	0	0	0	0	0	0	0	0	0	0	0	0	0	0	0	0	0	0	0	0	0	0	0	0	0	0	0	0	0	Bacteria	Planctomycetes	Planctomycetia	Planctomycetales	Planctomycetaceae	unclassified_Planctomycetaceae
ASV_1697	0	0	0	0	0	0	0	0	0	0	0	0	0	0	0	0	0	0	0	0	0	0	0	0	0	0	0	0	0	Bacteria	Planctomycetes	Planctomycetia	Planctomycetales	Planctomycetaceae	unclassified_Planctomycetaceae
ASV_1698	0	0	0	0	0	0	0	0	0	0	0	0	0	0	0	0	0	0	0	0	0	0	0	0	0	0	0	0	0	Bacteria	Proteobacteria	Alphaproteobacteria	Rhizobiales	unclassified_Rhizobiales	unclassified_Rhizobiales
ASV_1706	0	0	0	0	0	0	0	0	0	0	0	0	6	0	0	0	0	0	0	0	0	0	0	0	0	0	0	0	0	Bacteria	Proteobacteria	Alphaproteobacteria	Rhizobiales	unclassified_Rhizobiales	unclassified_Rhizobiales
ASV_1708	0	0	0	0	0	0	0	0	0	0	0	0	6	0	0	0	0	0	0	0	0	0	0	0	0	0	0	0	0	Bacteria	Actinobacteria	Actinobacteria	Actinomycetales	Propionibacteriaceae	Friedmanniella
ASV_1710	0	0	0	0	0	0	0	0	0	0	0	0	0	6	0	0	0	0	0	0	0	0	0	0	0	0	0	0	0	Bacteria	Actinobacteria	Actinobacteria	Actinomycetales	Nocardiaceae	Williamsia
ASV_1713	0	0	0	0	0	0	0	0	0	0	0	0	0	6	0	0	0	0	0	0	0	0	0	0	0	0	0	0	0	Bacteria	Actinobacteria	unclassified_Actinobacteria	unclassified_Actinobacteria	unclassified_Actinobacteria	unclassified_Actinobacteria
ASV_1714	0	0	0	0	0	0	0	0	0	0	0	0	0	6	0	0	0	0	0	0	0	0	0	0	0	0	0	0	0	Bacteria	Firmicutes	Clostridia	Clostridiales	Heliobacteriaceae	Hydrogenispora
ASV_1715	0	0	0	0	0	0	0	0	0	0	0	0	0	6	0	0	0	0	0	0	0	0	0	0	0	0	0	0	0	Bacteria	Proteobacteria	unclassified_Proteobacteria	unclassified_Proteobacteria	unclassified_Proteobacteria	unclassified_Proteobacteria
ASV_1719	0	0	0	0	0	0	0	0	0	0	0	0	0	0	0	0	0	0	0	0	0	0	0	0	0	0	0	0	0	Bacteria	Proteobacteria	Gammaproteobacteria	Xanthomonadales	Xanthomonadaceae	Arenimonas
[truncated: 485 more rows]

## Sheet: Table 6
Table 6: Percentage abundance of bacterial ASVs in the samples of winter rye plants
[truncated: 1,841 more rows]

[truncated: 4 more sheets: Table S7, Table S8, Table S9, Table S10]
