# Supplementary material for: Rye Snow Mold-Associated Microdochium nivale Strains Inhabiting a Common Area: Variability in Genetics, Morphotype, Extracellular Enzymatic Activities, and Virulence
Source: J Fungi (Basel). 2020 Dec 3;6(4):335. doi: 10.3390/jof6040335 (PMC7761817; doi:10.3390/jof6040335)
Supplement: Supplementary file 1 [file jof-06-00335-s001.zip › Table S14_S19.xls]

## Sheet: Table S14
Table S14: Attribution of the isolated Microdochium nivale strains to the particular OTUs
For each strain, 164 bp fragment of ITS2 region of rRNA was sequenced. The absolute abundance OTU-related reads is represented for each strain
OTU ID	Strain 1	Strain 2	Strain 3	Strain 4	Strain 5	Strain 6	Strain 7	Strain 8	Strain 9	Strain 10	Strain 11	Strain 12	Strain 13	Strain 14	Strain 15	Strain 16	Strain 17	Strain 18	Strain 19	Strain 20	Strain 21	Kingdom	Phylum	Class	Order	Family	Genus	Species
M.OTU1	7458	7470	0	8202	7460	7777	8313	0	0	0	0	0	6556	7238	7792	0	0	6943	7201	0	0	Ascomycota	Sordariomycetes	Xylariales	Microdochiaceae	Microdochium	Microdochium colombiense
M.OTU2	0	0	7841	0	0	0	0	0	9070	6603	0	9139	0	481	0	8815	10163	0	0	9311	8171	Ascomycota	Sordariomycetes	Xylariales	Hyponectriaceae	Monographella	Monographella nivalis
M.OTU4	0	0	0	0	0	0	0	0	0	0	5092	0	0	0	0	0	0	0	0	0	0	Ascomycota	Sordariomycetes	Xylariales	Hyponectriaceae	Monographella	Monographella nivalis
M.OTU5	0	0	0	0	0	0	0	9892	0	0	0	0	0	0	0	0	0	0	0	0	0	Ascomycota	Sordariomycetes	Xylariales	Hyponectriaceae	Monographella	Monographella nivalis

## Sheet: Table S15_M.OTU1
Table S15: IDs of the sequences having the highest levels of identity and coverage with the 164 bp fragment of ITS2 of M.OTU1
Species	Max Score	Total Score	Query cover	E-value	Identity %	NCBI sequence ID
Microdochium nivale	303	303	1	1e-78	100.00	MN428646.1
Microdochium majus	303	303	1	1e-78	100.00	JX280595.1
Microdochium majus	303	303	1	1e-78	100.00	JX280583.1
Microdochium majus	303	303	1	1e-78	100.00	KP859001.1
Microdochium majus	303	303	1	1e-78	100.00	MN759665.1
Microdochium nivale	303	303	1	1e-78	100.00	AM502266.1
Microdochium nivale	303	303	1	1e-78	100.00	AM502260.1
Microdochium nivale	303	303	1	1e-78	100.00	AB586987.1
Microdochium nivale	303	303	1	1e-78	100.00	AB272125.1
Microdochium nivale	303	303	1	1e-78	100.00	AB272124.1
Microdochium nivale	303	303	1	1e-78	100.00	MT941442.1
Microdochium nivale	303	303	1	1e-78	100.00	MT941443.1
Microdochium nivale	303	303	1	1e-78	100.00	MT941444.1
Microdochium nivale	303	303	1	1e-78	100.00	KY460750.1
Microdochium nivale	303	303	1	1e-78	100.00	KY460819.1
Microdochium nivale	303	303	1	1e-78	100.00	KY460810.1
Microdochium nivale	303	303	1	1e-78	100.00	KY460797.1
Microdochium nivale	303	303	1	1e-78	100.00	HM595722.1
Microdochium nivale	303	303	1	1e-78	100.00	JX280588.1
Microdochium nivale	303	303	1	1e-78	100.00	JX280603.1
Microdochium nivale	303	303	1	1e-78	100.00	MG891798.1
Microdochium nivale	303	303	1	1e-78	100.00	MG891797.1
Microdochium nivale	303	303	1	1e-78	100.00	MG891796.1
Microdochium nivale	303	303	1	1e-78	100.00	EF187912.1
Microdochium nivale	303	303	1	1e-78	100.00	MK460368.1
Microdochium nivale	303	303	1	1e-78	100.00	MG891794.1
Microdochium nivale	303	303	1	1e-78	100.00	MG891793.1
Microdochium nivale	303	303	1	1e-78	100.00	MG098306.1
Microdochium majus	303	303	1	1e-78	100.00	MH855031.1
Microdochium majus	303	303	1	1e-78	100.00	MH858044.1
Microdochium nivale	303	303	1	1e-78	100.00	MH857684.1
Microdochium nivale	303	303	1	1e-78	100.00	MH856626.1
Microdochium nivale	298	298	1	6e-77	99.39	JX280607.1
Microdochium nivale	292	292	1	3e-75	98.79	AF067642.1
Microdochium nivale	292	292	1	3e-75	98.79	KY460789.1
Microdochium nivale	292	292	1	3e-75	98.79	MN759666.1
Microdochium nivale	292	292	1	3e-75	98.78	FN394723.1
Microdochium nivale	292	292	1	3e-75	98.78	JX280590.1
Microdochium nivale	292	292	1	3e-75	98.78	JX280587.1
Microdochium nivale	292	292	1	3e-75	98.78	JX280589.1
Microdochium nivale	292	292	1	3e-75	98.78	MH392542.1
Microdochium majus	292	292	0.96	3e-75	100.00	KT736198.1
Microdochium majus	292	292	0.96	3e-75	100.00	KT736194.1
Microdochium majus	292	292	0.96	3e-75	100.00	KT736191.1
Microdochium majus	292	292	0.96	3e-75	100.00	KT736181.1
Microdochium majus	292	292	0.96	3e-75	100.00	KT736197.1
Microdochium majus	292	292	0.96	3e-75	100.00	KT736205.1
Microdochium majus	292	292	0.96	3e-75	100.00	KT736204.1
Microdochium majus	292	292	0.96	3e-75	100.00	KT736206.1
Microdochium majus	292	292	0.96	3e-75	100.00	KT736203.1
Microdochium majus	292	292	0.96	3e-75	100.00	KT736193.1
Microdochium majus	292	292	0.96	3e-75	100.00	KT736192.1
Microdochium nivale	292	292	0.96	3e-75	100.00	KT736207.1
Microdochium nivale	292	292	0.96	3e-75	100.00	KT736210.1
Microdochium nivale	292	292	0.96	3e-75	100.00	KT736195.1
Microdochium nivale	292	292	0.96	3e-75	100.00	KT736196.1
Microdochium nivale	292	292	0.96	3e-75	100.00	KT736208.1
Microdochium nivale	292	292	0.96	3e-75	100.00	KT736211.1
Microdochium nivale	292	292	0.96	3e-75	100.00	KT736209.1
Microdochium nivale	292	292	0.96	3e-75	100.00	KT736212.1
Microdochium nivale	289	289	1	4e-74	98.20	KY460788.1
Microdochium nivale	287	287	1	1e-73	98.17	AB586986.1
Microdochium nivale	287	287	1	1e-73	98.17	MN313307.1
Microdochium nivale	287	287	1	1e-73	98.17	JX280601.1
Microdochium nivale	287	287	1	1e-73	98.17	KP859008.1
Microdochium nivale	287	287	1	1e-73	98.17	KT692594.1
Microdochium nivale	287	287	1	1e-73	98.17	MH856120.1
Microdochium majus	287	287	0.96	1e-73	99.37	KT736184.1
Microdochium nivale	287	287	0.96	1e-73	99.37	KT736185.1
Microdochium nivale	287	287	0.96	1e-73	99.37	KT736201.1
Microdochium nivale	287	287	0.96	1e-73	99.37	KT736182.1
Microdochium nivale	287	287	0.96	1e-73	99.37	KT736200.1
Microdochium nivale	287	287	0.96	1e-73	99.37	KT736202.1
Microdochium nivale	287	287	0.96	1e-73	99.37	KT736186.1
Microdochium nivale	283	283	1	2e-72	98.17	HQ533821.1
Microdochium nivale	281	281	0.96	6e-72	98.73	KT736219.1
Microdochium nivale	281	281	0.96	6e-72	98.73	KT736199.1
Microdochium nivale	281	281	0.96	6e-72	98.73	KT736216.1
Microdochium nivale	281	281	0.96	6e-72	98.73	KT736189.1
Microdochium nivale	281	281	0.96	6e-72	98.73	KT736215.1
Microdochium nivale	281	281	0.96	6e-72	98.73	KT736220.1
Microdochium nivale	281	281	0.96	6e-72	98.73	KT736217.1
Microdochium nivale	279	279	0.97	2e-71	98.12	KT736214.1
Microdochium nivale	278	278	0.97	8e-71	98.12	KT736190.1
Microdochium nivale	276	276	0.96	3e-70	98.10	KT736213.1
Microdochium nivale	276	276	0.96	3e-70	98.10	KT736183.1
Microdochium nivale	276	276	0.96	3e-70	98.10	KT736218.1
Microdochium nivale	276	276	0.96	3e-70	98.10	KT736188.1
Microdochium nivale	276	276	0.96	3e-70	98.10	KT736187.1
Microdochium nivale	270	270	1	1e-68	96.36	KJ780751.1
Microdochium nivale	270	270	1	1e-68	96.36	MK651531.1
Microdochium poae	270	270	1	1e-68	96.36	LC500480.1
Microdochium poae	270	270	1	1e-68	96.36	NR_163757.1
Microdochium colombiense	270	270	1	1e-68	96.34	NR_155372.1
Microdochium nivale	268	268	1	5e-68	96.36	KY460800.1
Microdochium bolleyi	267	267	1	2e-67	95.81	KY054752.1
Microdochium bolleyi	267	267	1	2e-67	95.78	MN759691.1
Microdochium nivale	263	263	0.88	2e-66	99.31	MN534787.1
Microdochium bolleyi	261	261	1	8e-66	95.21	LT990657.1
Microdochium bolleyi	261	261	1	8e-66	95.21	KU578329.1
Microdochium bolleyi	261	261	1	8e-66	95.21	MN534831.1
Microdochium bolleyi	261	261	1	8e-66	95.21	MN313298.1
Microdochium bolleyi	261	261	1	8e-66	95.21	MH473870.1
Microdochium bolleyi	261	261	1	8e-66	95.21	KU901552.1
Microdochium bolleyi	261	261	1	8e-66	95.21	KU901553.1
Microdochium bolleyi	261	261	1	8e-66	95.21	MT276118.1
Microdochium bolleyi	261	261	1	8e-66	95.21	MT276135.1
Microdochium bolleyi	261	261	1	8e-66	95.21	MT276137.1
Microdochium bolleyi	261	261	1	8e-66	95.21	MT276065.1
Microdochium bolleyi	261	261	1	8e-66	95.21	MT276069.1
Microdochium bolleyi	261	261	1	8e-66	95.21	MT276088.1
Microdochium bolleyi	261	261	1	8e-66	95.21	MT276095.1
Microdochium bolleyi	261	261	1	8e-66	95.21	MT276068.1
Microdochium bolleyi	261	261	1	8e-66	95.21	MK212854.1
Microdochium bolleyi	261	261	1	8e-66	95.21	MK212890.1
Microdochium bolleyi	261	261	1	8e-66	95.21	MK212892.1
Microdochium bolleyi	261	261	1	8e-66	95.21	MK212897.1
Microdochium bolleyi	261	261	1	8e-66	95.21	MK212899.1
Microdochium bolleyi	261	261	1	8e-66	95.21	MK212901.1
Microdochium bolleyi	261	261	1	8e-66	95.21	MK212902.1
Microdochium bolleyi	261	261	1	8e-66	95.21	MK212903.1
Microdochium bolleyi	261	261	1	8e-66	95.21	MK212904.1
Microdochium bolleyi	261	261	1	8e-66	95.21	MK212905.1
Microdochium bolleyi	261	261	1	8e-66	95.21	MK212911.1
Microdochium bolleyi	261	261	1	8e-66	95.21	KX067817.1
Microdochium bolleyi	261	261	1	8e-66	95.21	MN313335.1
Microdochium bolleyi	261	261	1	8e-66	95.21	KY460818.1
Microdochium bolleyi	261	261	1	8e-66	95.21	MF688675.1
Microdochium bolleyi	261	261	1	8e-66	95.21	MF688683.1
Microdochium bolleyi	261	261	1	8e-66	95.21	KX058046.1
Microdochium bolleyi	261	261	1	8e-66	95.21	MT151008.1
Microdochium bolleyi	261	261	1	8e-66	95.21	MT102452.1
Microdochium bolleyi	261	261	1	8e-66	95.21	MH858394.1
Microdochium bolleyi	261	261	1	8e-66	95.21	KP859010.1
Microdochium bolleyi	261	261	1	8e-66	95.21	MH860598.1
Microdochium bolleyi	261	261	1	8e-66	95.21	MT102453.1
Microdochium bolleyi	261	261	1	8e-66	95.21	KP859018.1
Microdochium bolleyi	261	261	1	8e-66	95.21	MH311614.1
Microdochium bolleyi	261	261	1	8e-66	95.21	MH319854.1
Microdochium bolleyi	261	261	1	8e-66	95.21	MN759672.1
Microdochium bolleyi	261	261	1	8e-66	95.21	MN759685.1
Microdochium bolleyi	261	261	1	8e-66	95.21	MN759686.1
Microdochium bolleyi	261	261	1	8e-66	95.21	MN759687.1
Microdochium bolleyi	261	261	1	8e-66	95.21	MN759688.1
Microdochium bolleyi	261	261	1	8e-66	95.21	MN759689.1
Microdochium bolleyi	261	261	1	8e-66	95.21	MN759690.1
Microdochium bolleyi	261	261	1	8e-66	95.21	MN759692.1
Microdochium bolleyi	261	261	1	8e-66	95.21	MN759693.1
Microdochium bolleyi	261	261	1	8e-66	95.21	KY365578.1
Microdochium bolleyi	261	261	1	8e-66	95.21	KY365585.1
Microdochium bolleyi	261	261	1	8e-66	95.21	KY365586.1
Microdochium bolleyi	261	261	1	8e-66	95.21	KY365584.1
Microdochium bolleyi	261	261	1	8e-66	95.21	KY305060.1
Microdochium bolleyi	261	261	1	8e-66	95.21	KT692593.1
Microdochium bolleyi	261	261	1	8e-66	95.21	MT446062.1
Microdochium bolleyi	261	261	1	8e-66	95.21	MT446063.1
Microdochium bolleyi	261	261	1	8e-66	95.21	MT446081.1
Microdochium bolleyi	261	261	1	8e-66	95.21	MT446094.1
Microdochium bolleyi	261	261	1	8e-66	95.21	MT446099.1
Microdochium bolleyi	261	261	1	8e-66	95.21	MT446101.1
Microdochium bolleyi	261	261	1	8e-66	95.21	MT446104.1
Microdochium bolleyi	261	261	1	8e-66	95.21	MT446085.1
Microdochium bolleyi	261	261	1	8e-66	95.21	MK102681.1
Microdochium bolleyi	261	261	1	8e-66	95.21	MK102679.1
Microdochium bolleyi	261	261	1	8e-66	95.21	MK102676.1
Microdochium bolleyi	261	261	1	8e-66	95.21	MK102678.1
Microdochium bolleyi	261	261	1	8e-66	95.21	MK102682.1
Microdochium bolleyi	261	261	1	8e-66	95.21	MK102677.1
Microdochium bolleyi	261	261	1	8e-66	95.21	MK102673.1
Microdochium bolleyi	261	261	1	8e-66	95.21	MK102674.1
Microdochium bolleyi	261	261	1	8e-66	95.21	MK102680.1
Microdochium bolleyi	261	261	1	8e-66	95.21	MK102675.1
Microdochium bolleyi	261	261	1	8e-66	95.21	MT446119.1
Microdochium bolleyi	261	261	1	8e-66	95.21	MT446123.1
Microdochium bolleyi	261	261	1	8e-66	95.21	MT446139.1
Microdochium bolleyi	261	261	1	8e-66	95.21	MT446207.1
Microdochium bolleyi	261	261	0.98	8e-66	95.71	MN957201.1
Microdochium bolleyi	261	261	0.98	8e-66	95.71	KU901554.1

## Sheet: Table S16_M.OTU2
Table S16: IDs of the sequences having the highest levels of identity and coverage with the 164 bp fragment of ITS2 of M.OTU2
Species	Max Score	Total Score	Query cover	E-value	Identity %	NCBI sequence ID
Microdochium nivale	303	303	1	1e-78	100.00	AB586986.1
Microdochium nivale	303	303	1	1e-78	100.00	MN313307.1
Microdochium nivale	303	303	1	1e-78	100.00	KP859008.1
Microdochium nivale	303	303	1	1e-78	100.00	KT692594.1
Microdochium nivale	298	298	1	6e-77	99.39	JX280601.1
Microdochium nivale	296	296	0.97	2e-76	100.00	KT736214.1
Microdochium nivale	292	292	1	3e-75	98.78	FN394723.1
Microdochium nivale	292	292	1	3e-75	98.78	JX280590.1
Microdochium nivale	292	292	1	3e-75	98.78	JX280587.1
Microdochium nivale	292	292	1	3e-75	98.78	JX280589.1
Microdochium nivale	292	292	1	3e-75	98.78	MH392542.1
Monographella nivalis	292	292	1	3e-75	98.78	MN660864.1
Monographella nivalis	292	292	1	3e-75	98.78	FJ614641.1
Microdochium nivale	292	292	0.96	3e-75	100.00	KT736213.1
Microdochium nivale	292	292	0.96	3e-75	100.00	KT736183.1
Microdochium nivale	292	292	0.96	3e-75	100.00	KT736188.1
Microdochium nivale	292	292	0.96	3e-75	100.00	KT736187.1
Microdochium majus	287	287	1	1e-73	98.17	JX280595.1
Microdochium majus	287	287	1	1e-73	98.17	JX280583.1
Microdochium majus	287	287	1	1e-73	98.17	KP859001.1
Microdochium majus	287	287	1	1e-73	98.17	MN759665.1
Microdochium nivale	287	287	1	1e-73	98.17	AM502260.1
Microdochium nivale	287	287	1	1e-73	98.17	AM502266.1
Microdochium nivale	287	287	1	1e-73	98.17	AB272124.1
Microdochium nivale	287	287	1	1e-73	98.17	AB272125.1
Microdochium nivale	287	287	1	1e-73	98.17	AB586987.1
Microdochium nivale	287	287	1	1e-73	98.17	MN428646.1
Microdochium nivale	287	287	1	1e-73	98.17	MT941442.1
Microdochium nivale	287	287	1	1e-73	98.17	MT941443.1
Microdochium nivale	287	287	1	1e-73	98.17	MT941444.1
Microdochium nivale	287	287	1	1e-73	98.17	KY460750.1
Microdochium nivale	287	287	1	1e-73	98.17	KY460819.1
Microdochium nivale	287	287	1	1e-73	98.17	KY460810.1
Microdochium nivale	287	287	1	1e-73	98.17	KY460797.1
Microdochium nivale	287	287	1	1e-73	98.17	HM595722.1
Microdochium nivale	287	287	1	1e-73	98.17	JX280588.1
Microdochium nivale	287	287	1	1e-73	98.17	JX280603.1
Microdochium nivale	287	287	1	1e-73	98.17	MG891798.1
Microdochium nivale	287	287	1	1e-73	98.17	MG891797.1
Microdochium nivale	287	287	1	1e-73	98.17	MG891796.1
Microdochium nivale	287	287	1	1e-73	98.17	EF187912.1
Microdochium nivale	287	287	1	1e-73	98.17	MK460368.1
Microdochium nivale	287	287	1	1e-73	98.17	MG891794.1
Microdochium nivale	287	287	1	1e-73	98.17	MG891793.1
Microdochium nivale	287	287	1	1e-73	98.17	MG098306.1
Microdochium majus	287	287	1	1e-73	98.17	MH855031.1
Microdochium majus	287	287	1	1e-73	98.17	MH858044.1
Microdochium nivale	287	287	1	1e-73	98.17	MH856120.1
Microdochium nivale	287	287	1	1e-73	98.17	MH857684.1
Microdochium nivale	287	287	1	1e-73	98.17	MH856626.1
Monographella nivalis	287	287	1	1e-73	98.17	FJ614640.1
Microdochium nivale	281	281	0.96	6e-72	98.73	KT736219.1
Microdochium nivale	281	281	0.96	6e-72	98.73	KT736199.1
Microdochium nivale	281	281	0.96	6e-72	98.73	KT736216.1
Microdochium nivale	281	281	0.96	6e-72	98.73	KT736189.1
Microdochium nivale	281	281	0.96	6e-72	98.73	KT736215.1
Microdochium nivale	281	281	0.96	6e-72	98.73	KT736220.1
Microdochium nivale	281	281	0.96	6e-72	98.73	KT736217.1
Microdochium nivale	281	281	1	6e-72	97.56	JX280607.1
Microdochium majus	276	276	0.96	3e-70	98.10	KT736198.1
Microdochium majus	276	276	0.96	3e-70	98.10	KT736194.1
Microdochium majus	276	276	0.96	3e-70	98.10	KT736191.1
Microdochium majus	276	276	0.96	3e-70	98.10	KT736181.1
Microdochium majus	276	276	0.96	3e-70	98.10	KT736197.1
Microdochium majus	276	276	0.96	3e-70	98.10	KT736205.1
Microdochium majus	276	276	0.96	3e-70	98.10	KT736204.1
Microdochium majus	276	276	0.96	3e-70	98.10	KT736206.1
Microdochium majus	276	276	0.96	3e-70	98.10	KT736203.1
Microdochium majus	276	276	0.96	3e-70	98.10	KT736193.1
Microdochium majus	276	276	0.96	3e-70	98.10	KT736192.1
Microdochium nivale	276	276	0.96	3e-70	98.10	KT736207.1
Microdochium nivale	276	276	0.96	3e-70	98.10	KT736210.1
Microdochium nivale	276	276	0.96	3e-70	98.10	KT736195.1
Microdochium nivale	276	276	0.96	3e-70	98.10	KT736196.1
Microdochium nivale	276	276	0.96	3e-70	98.10	KT736208.1
Microdochium nivale	276	276	0.96	3e-70	98.10	KT736211.1
Microdochium nivale	276	276	0.96	3e-70	98.10	KT736209.1
Microdochium nivale	276	276	0.96	3e-70	98.10	KT736212.1
Microdochium nivale	276	276	0.96	3e-70	98.10	KT736218.1
Microdochium nivale	276	276	1	3e-70	96.97	AF067642.1
Microdochium nivale	276	276	1	3e-70	96.97	KY460789.1
Microdochium nivale	276	276	1	3e-70	96.97	MN759666.1
Microdochium nivale	272	272	0.97	4e-69	97.50	KT736190.1
Microdochium nivale	272	272	1	4e-69	96.41	KY460788.1
Monographella nivalis	270	270	0.92	1e-68	98.68	MN660593.1
Microdochium majus	270	270	0.96	1e-68	97.48	KT736184.1
Microdochium nivale	270	270	0.96	1e-68	97.48	KT736185.1
Microdochium nivale	270	270	0.96	1e-68	97.48	KT736182.1
Microdochium nivale	270	270	0.96	1e-68	97.48	KT736186.1
Microdochium nivale	270	270	0.96	1e-68	97.47	KT736201.1
Microdochium nivale	270	270	0.96	1e-68	97.47	KT736200.1
Microdochium nivale	270	270	0.96	1e-68	97.47	KT736202.1
Microdochium nivale	267	267	1	2e-67	96.34	HQ533821.1
Microdochium colombiense	265	265	1	6e-67	95.73	NR_155372.1
Microdochium nivale	263	263	0.9	2e-66	98.65	MN534787.1
Microdochium bolleyi	255	255	1	4e-64	94.61	KY054752.1
Microdochium bolleyi	255	255	1	4e-64	94.58	MN759691.1
Microdochium nivale	254	254	1	1e-63	94.55	KJ780751.1
Microdochium nivale	254	254	1	1e-63	94.55	MK651531.1
Microdochium poae	254	254	1	1e-63	94.55	LC500480.1
Microdochium poae	254	254	1	1e-63	94.55	NR_163757.1
Monographella nivalis	254	254	1	1e-63	94.51	MN957065.1
Microdochium nivale	252	252	1	5e-63	94.55	KY460800.1
Microdochium bolleyi	250	250	0.98	2e-62	94.48	KU901554.1
Microdochium bolleyi	250	250	0.98	2e-62	94.48	MN957201.1
Microdochium bolleyi	250	250	1	2e-62	94.01	LT990657.1
Microdochium bolleyi	250	250	1	2e-62	94.01	KU578329.1
Microdochium bolleyi	250	250	1	2e-62	94.01	MN534831.1
Microdochium bolleyi	250	250	1	2e-62	94.01	MN313298.1
Microdochium bolleyi	250	250	1	2e-62	94.01	MH473870.1
Microdochium bolleyi	250	250	1	2e-62	94.01	KU901552.1
Microdochium bolleyi	250	250	1	2e-62	94.01	KU901553.1
Microdochium bolleyi	250	250	1	2e-62	94.01	MT276118.1
Microdochium bolleyi	250	250	1	2e-62	94.01	MT276135.1
Microdochium bolleyi	250	250	1	2e-62	94.01	MT276137.1
Microdochium bolleyi	250	250	1	2e-62	94.01	MT276065.1
Microdochium bolleyi	250	250	1	2e-62	94.01	MT276069.1
Microdochium bolleyi	250	250	1	2e-62	94.01	MT276088.1
Microdochium bolleyi	250	250	1	2e-62	94.01	MT276095.1
Microdochium bolleyi	250	250	1	2e-62	94.01	MT276068.1
Microdochium bolleyi	250	250	1	2e-62	94.01	MK212854.1
Microdochium bolleyi	250	250	1	2e-62	94.01	MK212890.1
Microdochium bolleyi	250	250	1	2e-62	94.01	MK212892.1
Microdochium bolleyi	250	250	1	2e-62	94.01	MK212897.1
Microdochium bolleyi	250	250	1	2e-62	94.01	MK212899.1
Microdochium bolleyi	250	250	1	2e-62	94.01	MK212901.1
Microdochium bolleyi	250	250	1	2e-62	94.01	MK212902.1
Microdochium bolleyi	250	250	1	2e-62	94.01	MK212903.1
Microdochium bolleyi	250	250	1	2e-62	94.01	MK212904.1
Microdochium bolleyi	250	250	1	2e-62	94.01	MK212905.1
Microdochium bolleyi	250	250	1	2e-62	94.01	MK212911.1
Microdochium bolleyi	250	250	1	2e-62	94.01	KX067817.1
Microdochium bolleyi	250	250	1	2e-62	94.01	MN313335.1
Microdochium bolleyi	250	250	1	2e-62	94.01	KY460818.1
Microdochium bolleyi	250	250	1	2e-62	94.01	MF688675.1
Microdochium bolleyi	250	250	1	2e-62	94.01	MF688683.1
Microdochium bolleyi	250	250	1	2e-62	94.01	KX058046.1
Microdochium bolleyi	250	250	1	2e-62	94.01	MT151008.1
Microdochium bolleyi	250	250	1	2e-62	94.01	MT102452.1
Microdochium bolleyi	250	250	1	2e-62	94.01	MH858394.1
Microdochium bolleyi	250	250	1	2e-62	94.01	KP859010.1
Microdochium bolleyi	250	250	1	2e-62	94.01	MH860598.1
Microdochium bolleyi	250	250	1	2e-62	94.01	MT102453.1
Microdochium bolleyi	250	250	1	2e-62	94.01	KP859018.1
Microdochium bolleyi	250	250	1	2e-62	94.01	MH311614.1
Microdochium bolleyi	250	250	1	2e-62	94.01	MH319854.1
Microdochium bolleyi	250	250	1	2e-62	94.01	MN759672.1
Microdochium bolleyi	250	250	1	2e-62	94.01	MN759685.1
Microdochium bolleyi	250	250	1	2e-62	94.01	MN759686.1
Microdochium bolleyi	250	250	1	2e-62	94.01	MN759687.1
Microdochium bolleyi	250	250	1	2e-62	94.01	MN759688.1
Microdochium bolleyi	250	250	1	2e-62	94.01	MN759689.1
Microdochium bolleyi	250	250	1	2e-62	94.01	MN759690.1
Microdochium bolleyi	250	250	1	2e-62	94.01	MN759692.1
Microdochium bolleyi	250	250	1	2e-62	94.01	MN759693.1
Microdochium bolleyi	250	250	1	2e-62	94.01	KY365578.1
Microdochium bolleyi	250	250	1	2e-62	94.01	MN338380.1
Microdochium bolleyi	250	250	1	2e-62	94.01	KY365585.1
Microdochium bolleyi	250	250	1	2e-62	94.01	KY365586.1
Microdochium bolleyi	250	250	1	2e-62	94.01	KY365584.1
Microdochium bolleyi	250	250	1	2e-62	94.01	KY305060.1
Microdochium bolleyi	250	250	1	2e-62	94.01	KT692593.1
Microdochium bolleyi	250	250	1	2e-62	94.01	MT446062.1
Microdochium bolleyi	250	250	1	2e-62	94.01	MT446063.1
Microdochium bolleyi	250	250	1	2e-62	94.01	MT446081.1
Microdochium bolleyi	250	250	1	2e-62	94.01	MT446094.1
Microdochium bolleyi	250	250	1	2e-62	94.01	MT446099.1
Microdochium bolleyi	250	250	1	2e-62	94.01	MT446101.1
Microdochium bolleyi	250	250	1	2e-62	94.01	MT446104.1
Microdochium bolleyi	250	250	1	2e-62	94.01	MT446085.1
Microdochium bolleyi	250	250	1	2e-62	94.01	MK102681.1
Microdochium bolleyi	250	250	1	2e-62	94.01	MK102679.1
Microdochium bolleyi	250	250	1	2e-62	94.01	MK102676.1
Microdochium bolleyi	250	250	1	2e-62	94.01	MK102678.1
Microdochium bolleyi	250	250	1	2e-62	94.01	MK102682.1
Microdochium bolleyi	250	250	1	2e-62	94.01	MK102677.1
Microdochium bolleyi	250	250	1	2e-62	94.01	MK102673.1
Microdochium bolleyi	250	250	1	2e-62	94.01	MK102674.1
Microdochium bolleyi	250	250	1	2e-62	94.01	MK102680.1
Microdochium bolleyi	250	250	1	2e-62	94.01	MK102675.1
Microdochium bolleyi	250	250	1	2e-62	94.01	MT446119.1
Microdochium bolleyi	250	250	1	2e-62	94.01	MT446123.1
Microdochium bolleyi	250	250	1	2e-62	94.01	MT446139.1
Microdochium bolleyi	250	250	1	2e-62	94.01	MT446207.1

## Sheet: Table S17_M.OTU3
Table S17: IDs of the sequences having the highest levels of identity and coverage with the 164 bp fragment of ITS2 of M.OTU3
Species	Max Score	Total Score	Query cover	E-value	Identity %	NCBI sequence ID
Microdochium bolleyi	309	309	1	3e-80	100.00	AM502261.1
Microdochium bolleyi	309	309	1	3e-80	100.00	AM502264.1
Microdochium bolleyi	309	309	1	3e-80	100.00	AM924150.1
Microdochium bolleyi	309	309	1	3e-80	100.00	LT990657.1
Microdochium bolleyi	309	309	1	3e-80	100.00	HM007082.1
Microdochium bolleyi	309	309	1	3e-80	100.00	KF018416.1
Microdochium bolleyi	309	309	1	3e-80	100.00	KU578329.1
Microdochium bolleyi	309	309	1	3e-80	100.00	KC989068.1
Microdochium bolleyi	309	309	1	3e-80	100.00	MN534831.1
Microdochium bolleyi	309	309	1	3e-80	100.00	HQ703412.1
Microdochium bolleyi	309	309	1	3e-80	100.00	MN313298.1
Microdochium bolleyi	309	309	1	3e-80	100.00	MH473870.1
Microdochium bolleyi	309	309	1	3e-80	100.00	KU901552.1
Microdochium bolleyi	309	309	1	3e-80	100.00	KU901553.1
Microdochium bolleyi	309	309	1	3e-80	100.00	MT276118.1
Microdochium bolleyi	309	309	1	3e-80	100.00	MT276135.1
Microdochium bolleyi	309	309	1	3e-80	100.00	MT276137.1
Microdochium bolleyi	309	309	1	3e-80	100.00	MT276065.1
Microdochium bolleyi	309	309	1	3e-80	100.00	MT276069.1
Microdochium bolleyi	309	309	1	3e-80	100.00	MT276088.1
Microdochium bolleyi	309	309	1	3e-80	100.00	MT276095.1
Microdochium bolleyi	309	309	1	3e-80	100.00	MT276068.1
Microdochium bolleyi	309	309	1	3e-80	100.00	GU934539.1
Microdochium bolleyi	309	309	1	3e-80	100.00	GU934540.1
Microdochium bolleyi	309	309	1	3e-80	100.00	MK212854.1
Microdochium bolleyi	309	309	1	3e-80	100.00	MK212890.1
Microdochium bolleyi	309	309	1	3e-80	100.00	MK212892.1
Microdochium bolleyi	309	309	1	3e-80	100.00	MK212897.1
Microdochium bolleyi	309	309	1	3e-80	100.00	MK212899.1
Microdochium bolleyi	309	309	1	3e-80	100.00	MK212901.1
Microdochium bolleyi	309	309	1	3e-80	100.00	MK212902.1
Microdochium bolleyi	309	309	1	3e-80	100.00	MK212903.1
Microdochium bolleyi	309	309	1	3e-80	100.00	MK212904.1
Microdochium bolleyi	309	309	1	3e-80	100.00	MK212905.1
Microdochium bolleyi	309	309	1	3e-80	100.00	MK212911.1
Microdochium bolleyi	309	309	1	3e-80	100.00	KX067817.1
Microdochium bolleyi	309	309	1	3e-80	100.00	MN313335.1
Microdochium bolleyi	309	309	1	3e-80	100.00	KY460818.1
Microdochium bolleyi	309	309	1	3e-80	100.00	MF688675.1
Microdochium bolleyi	309	309	1	3e-80	100.00	MF688683.1
Microdochium bolleyi	309	309	1	3e-80	100.00	AJ279454.1
Microdochium bolleyi	309	309	1	3e-80	100.00	AJ279475.1
Microdochium bolleyi	309	309	1	3e-80	100.00	KF646098.1
Microdochium bolleyi	309	309	1	3e-80	100.00	JX280599.1
Microdochium bolleyi	309	309	1	3e-80	100.00	JX280600.1
Microdochium bolleyi	309	309	1	3e-80	100.00	KX058046.1
Microdochium bolleyi	309	309	1	3e-80	100.00	MT151008.1
Microdochium bolleyi	309	309	1	3e-80	100.00	MT102452.1
Microdochium bolleyi	309	309	1	3e-80	100.00	MH858394.1
Microdochium bolleyi	309	309	1	3e-80	100.00	KP859010.1
Microdochium bolleyi	309	309	1	3e-80	100.00	MH860598.1
Microdochium bolleyi	309	309	1	3e-80	100.00	GU566262.1
Microdochium bolleyi	309	309	1	3e-80	100.00	GU566298.1
Microdochium bolleyi	309	309	1	3e-80	100.00	MT102453.1
Microdochium bolleyi	309	309	1	3e-80	100.00	KP859018.1
Microdochium bolleyi	309	309	1	3e-80	100.00	MH311614.1
Microdochium bolleyi	309	309	1	3e-80	100.00	MH319854.1
Microdochium bolleyi	309	309	1	3e-80	100.00	MN759672.1
Microdochium bolleyi	309	309	1	3e-80	100.00	MN759685.1
Microdochium bolleyi	309	309	1	3e-80	100.00	MN759686.1
Microdochium bolleyi	309	309	1	3e-80	100.00	MN759687.1
Microdochium bolleyi	309	309	1	3e-80	100.00	MN759688.1
Microdochium bolleyi	309	309	1	3e-80	100.00	MN759689.1
Microdochium bolleyi	309	309	1	3e-80	100.00	MN759690.1
Microdochium bolleyi	309	309	1	3e-80	100.00	MN759692.1
Microdochium bolleyi	309	309	1	3e-80	100.00	MN759693.1
Microdochium bolleyi	309	309	1	3e-80	100.00	KY365578.1
Microdochium bolleyi	309	309	1	3e-80	100.00	KY365585.1
Microdochium bolleyi	309	309	1	3e-80	100.00	KY365586.1
Microdochium bolleyi	309	309	1	3e-80	100.00	KY365584.1
Microdochium bolleyi	309	309	1	3e-80	100.00	KY305060.1
Microdochium bolleyi	309	309	1	3e-80	100.00	JQ658340.1
Microdochium bolleyi	309	309	1	3e-80	100.00	KT692593.1
Microdochium bolleyi	309	309	1	3e-80	100.00	KJ188678.1
Microdochium bolleyi	309	309	1	3e-80	100.00	MT446062.1
Microdochium bolleyi	309	309	1	3e-80	100.00	MT446063.1
Microdochium bolleyi	309	309	1	3e-80	100.00	MT446081.1
Microdochium bolleyi	309	309	1	3e-80	100.00	MT446094.1
Microdochium bolleyi	309	309	1	3e-80	100.00	MT446099.1
Microdochium bolleyi	309	309	1	3e-80	100.00	MT446101.1
Microdochium bolleyi	309	309	1	3e-80	100.00	MT446104.1
Microdochium bolleyi	309	309	1	3e-80	100.00	MT446085.1
Microdochium bolleyi	309	309	1	3e-80	100.00	MK102681.1
Microdochium bolleyi	309	309	1	3e-80	100.00	MK102679.1
Microdochium bolleyi	309	309	1	3e-80	100.00	MK102676.1
Microdochium bolleyi	309	309	1	3e-80	100.00	MK102678.1
Microdochium bolleyi	309	309	1	3e-80	100.00	MK102682.1
Microdochium bolleyi	309	309	1	3e-80	100.00	MK102677.1
Microdochium bolleyi	309	309	1	3e-80	100.00	MK102673.1
Microdochium bolleyi	309	309	1	3e-80	100.00	MK102674.1
Microdochium bolleyi	309	309	1	3e-80	100.00	MK102680.1
Microdochium bolleyi	309	309	1	3e-80	100.00	MK102675.1
Microdochium bolleyi	309	309	1	3e-80	100.00	MT446119.1
Microdochium bolleyi	309	309	1	3e-80	100.00	MT446123.1
Microdochium bolleyi	309	309	1	3e-80	100.00	MT446139.1
Microdochium bolleyi	309	309	1	3e-80	100.00	MT446207.1
Microdochium bolleyi	307	307	0.99	1e-79	100.00	KF600798.1
Microdochium bolleyi	305	305	0.98	4e-79	100.00	KU901554.1
Microdochium bolleyi	303	303	1	1e-78	99.40	AM502262.1
Microdochium bolleyi	303	303	1	1e-78	99.40	MN957201.1
Microdochium bolleyi	303	303	1	1e-78	99.40	MN338379.1
Microdochium bolleyi	303	303	1	1e-78	99.40	MN338378.1
Microdochium bolleyi	302	302	1	5e-78	99.40	MN759691.1
Microdochium bolleyi	300	300	1	2e-77	98.82	MN957605.1
Microdochium bolleyi	298	298	1	6e-77	98.80	MH858255.1
Microdochium bolleyi	298	298	1	6e-77	98.80	MN338380.1
Microdochium bolleyi	292	292	1	3e-75	98.21	AM502265.1
Microdochium bolleyi	292	292	1	3e-75	98.20	KY054752.1
Microdochium bolleyi	285	285	0.93	5e-73	99.36	MH791255.1
Microdochium bolleyi	283	283	0.94	2e-72	98.75	HM216206.1
Microdochium bolleyi	276	276	1	3e-70	96.41	KR534652.1
Microdochium chrysanthemoides	276	276	1	3e-70	96.41	KU746690.1
Microdochium chrysanthemoides	276	276	1	3e-70	96.41	KU746689.1
Microdochium novae-zelandiae	276	276	1	3e-70	96.41	LT990655.1
Microdochium novae-zelandiae	276	276	1	3e-70	96.41	LT990656.1
Microdochium novae-zelandiae	276	276	1	3e-70	96.41	MN077458.1
Microdochium musae	274	274	1	1e-69	96.41	MH107894.1
Microdochium musae	274	274	1	1e-69	96.41	MH107896.1
Microdochium musae	274	274	1	1e-69	96.41	MH107897.1
Microdochium musae	274	274	1	1e-69	96.41	MH107898.1
Microdochium musae	274	274	1	1e-69	96.41	MH107899.1
Microdochium musae	274	274	1	1e-69	96.41	NR_158870.1
Monographella stoveri	274	274	1	1e-69	96.41	FJ430601.1
Microdochium bolleyi	270	270	1	1e-68	95.83	KR534708.1
Microdochium colombiense	267	267	1	2e-67	95.81	NR_155372.1
Monographella nivalis	267	267	1	2e-67	95.81	MN957065.1
Microdochium nivale	263	263	1	2e-66	95.21	AF067642.1
Microdochium nivale	263	263	1	2e-66	95.21	MN759666.1
Microdochium majus	261	261	1	8e-66	95.21	MN759665.1
Microdochium nivale	261	261	1	8e-66	95.21	MN428646.1
Microdochium nivale	261	261	1	8e-66	95.21	MK651531.1
Microdochium nivale	261	261	1	8e-66	95.21	MG891798.1
Microdochium nivale	261	261	1	8e-66	95.21	MG891797.1
Microdochium nivale	261	261	1	8e-66	95.21	MG891796.1
Microdochium nivale	261	261	1	8e-66	95.21	MK460368.1
Microdochium nivale	261	261	1	8e-66	95.21	MG891794.1
Microdochium nivale	261	261	1	8e-66	95.21	MG891793.1
Microdochium nivale	261	261	1	8e-66	95.21	MH855031.1
Microdochium majus	261	261	1	8e-66	95.21	MH858044.1
Microdochium majus	261	261	1	8e-66	95.21	MH857684.1
Microdochium nivale	261	261	1	8e-66	95.21	MH856626.1
Microdochium poae	261	261	1	8e-66	95.21	NR_163757.1

## Sheet: Table S18_M.OTU4
Table S18: IDs of the sequences having the highest levels of identity and coverage with the 164 bp fragment of ITS2 of M.OTU4
Species	Max Score	Total Score	Query cover	E-value	Identity %	NCBI sequence ID
Microdochium majus	302	302	0.99	5e-78	100.00	JX280595.1
Microdochium majus	302	302	0.99	5e-78	100.00	JX280583.1
Microdochium majus	302	302	0.99	5e-78	100.00	KP859001.1
Microdochium majus	302	302	0.99	5e-78	100.00	MN759665.1
Microdochium nivale	302	302	0.99	5e-78	100.00	AM502260.1
Microdochium nivale	302	302	0.99	5e-78	100.00	AM502266.1
Microdochium nivale	302	302	0.99	5e-78	100.00	AB272124.1
Microdochium nivale	302	302	0.99	5e-78	100.00	AB272125.1
Microdochium nivale	302	302	0.99	5e-78	100.00	AB586987.1
Microdochium nivale	302	302	0.99	5e-78	100.00	MN428646.1
Microdochium nivale	302	302	0.99	5e-78	100.00	MT941442.1
Microdochium nivale	302	302	0.99	5e-78	100.00	MT941443.1
Microdochium nivale	302	302	0.99	5e-78	100.00	MT941444.1
Microdochium nivale	302	302	0.99	5e-78	100.00	KY460750.1
Microdochium nivale	302	302	0.99	5e-78	100.00	KY460819.1
Microdochium nivale	302	302	0.99	5e-78	100.00	KY460810.1
Microdochium nivale	302	302	0.99	5e-78	100.00	KY460797.1
Microdochium nivale	302	302	0.99	5e-78	100.00	HM595722.1
Microdochium nivale	302	302	0.99	5e-78	100.00	JX280588.1
Microdochium nivale	302	302	0.99	5e-78	100.00	JX280603.1
Microdochium nivale	302	302	0.99	5e-78	100.00	MG891798.1
Microdochium nivale	302	302	0.99	5e-78	100.00	MG891797.1
Microdochium nivale	302	302	0.99	5e-78	100.00	MG891796.1
Microdochium nivale	302	302	0.99	5e-78	100.00	EF187912.1
Microdochium nivale	302	302	0.99	5e-78	100.00	MK460368.1
Microdochium nivale	302	302	0.99	5e-78	100.00	MG891794.1
Microdochium nivale	302	302	0.99	5e-78	100.00	MG891793.1
Microdochium nivale	302	302	0.99	5e-78	100.00	MG098306.1
Microdochium majus	302	302	0.99	5e-78	100.00	MH855031.1
Microdochium majus	302	302	0.99	5e-78	100.00	MH858044.1
Microdochium nivale	302	302	0.99	5e-78	100.00	MH857684.1
Microdochium nivale	302	302	0.99	5e-78	100.00	MH856626.1
Microdochium nivale	296	296	0.99	2e-76	99.39	JX280607.1
Microdochium nivale	291	291	0.99	1e-74	98.78	AF067642.1
Microdochium nivale	291	291	0.99	1e-74	98.78	KY460789.1
Microdochium nivale	291	291	0.99	1e-74	98.78	MN759666.1
Microdochium nivale	291	291	0.99	1e-74	98.77	FN394723.1
Microdochium nivale	291	291	0.99	1e-74	98.77	JX280590.1
Microdochium nivale	291	291	0.99	1e-74	98.77	JX280587.1
Microdochium nivale	291	291	0.99	1e-74	98.77	JX280589.1
Microdochium nivale	291	291	0.99	1e-74	98.77	MH392542.1
Monographella nivalis	291	291	0.99	1e-74	98.77	MN660864.1
Monographella nivalis	291	291	0.99	1e-74	98.77	FJ614641.1
Microdochium majus	291	291	0.95	1e-74	100.00	KT736198.1
Microdochium majus	291	291	0.95	1e-74	100.00	KT736194.1
Microdochium majus	291	291	0.95	1e-74	100.00	KT736191.1
Microdochium majus	291	291	0.95	1e-74	100.00	KT736181.1
Microdochium majus	291	291	0.95	1e-74	100.00	KT736197.1
Microdochium majus	291	291	0.95	1e-74	100.00	KT736205.1
Microdochium majus	291	291	0.95	1e-74	100.00	KT736204.1
Microdochium majus	291	291	0.95	1e-74	100.00	KT736206.1
Microdochium majus	291	291	0.95	1e-74	100.00	KT736203.1
Microdochium majus	291	291	0.95	1e-74	100.00	KT736193.1
Microdochium majus	291	291	0.95	1e-74	100.00	KT736192.1
Microdochium nivale	291	291	0.95	1e-74	100.00	KT736207.1
Microdochium nivale	291	291	0.95	1e-74	100.00	KT736210.1
Microdochium nivale	291	291	0.95	1e-74	100.00	KT736195.1
Microdochium nivale	291	291	0.95	1e-74	100.00	KT736196.1
Microdochium nivale	291	291	0.95	1e-74	100.00	KT736208.1
Microdochium nivale	291	291	0.95	1e-74	100.00	KT736211.1
Microdochium nivale	291	291	0.95	1e-74	100.00	KT736209.1
Microdochium nivale	291	291	0.95	1e-74	100.00	KT736212.1
Microdochium nivale	289	289	0.98	4e-74	98.77	KY460788.1
Microdochium majus	285	285	0.96	5e-73	99.37	KT736184.1
Microdochium nivale	285	285	0.96	5e-73	99.37	KT736185.1
Microdochium nivale	285	285	0.96	5e-73	99.37	KT736182.1
Microdochium nivale	285	285	0.96	5e-73	99.37	KT736186.1
Microdochium nivale	285	285	0.95	5e-73	99.36	KT736201.1
Microdochium nivale	285	285	0.95	5e-73	99.36	KT736200.1
Microdochium nivale	285	285	0.95	5e-73	99.36	KT736202.1
Microdochium nivale	285	285	0.99	5e-73	98.16	AB586986.1
Microdochium nivale	285	285	0.99	5e-73	98.16	MN313307.1
Microdochium nivale	285	285	0.99	5e-73	98.16	JX280601.1
Microdochium nivale	285	285	0.99	5e-73	98.16	KP859008.1
Microdochium nivale	285	285	0.99	5e-73	98.16	KT692594.1
Microdochium nivale	285	285	0.99	5e-73	98.16	MH856120.1
Monographella nivalis	285	285	0.99	5e-73	98.16	FJ614640.1
Microdochium nivale	281	281	0.99	6e-72	98.16	HQ533821.1
Microdochium nivale	279	279	0.95	2e-71	98.73	KT736219.1
Microdochium nivale	279	279	0.95	2e-71	98.73	KT736199.1
Microdochium nivale	279	279	0.95	2e-71	98.73	KT736216.1
Microdochium nivale	279	279	0.95	2e-71	98.73	KT736189.1
Microdochium nivale	279	279	0.95	2e-71	98.73	KT736215.1
Microdochium nivale	279	279	0.95	2e-71	98.73	KT736220.1
Microdochium nivale	279	279	0.95	2e-71	98.73	KT736217.1
Microdochium nivale	278	278	0.96	8e-71	98.11	KT736214.1
Microdochium nivale	276	276	0.96	3e-70	98.11	KT736190.1
Microdochium nivale	274	274	0.95	1e-69	98.09	KT736213.1
Microdochium nivale	274	274	0.95	1e-69	98.09	KT736183.1
Microdochium nivale	274	274	0.95	1e-69	98.09	KT736218.1
Microdochium nivale	274	274	0.95	1e-69	98.09	KT736188.1
Microdochium nivale	274	274	0.95	1e-69	98.09	KT736187.1
Monographella nivalis	268	268	0.92	5e-68	98.68	MN660593.1
Microdochium nivale	268	268	0.99	5e-68	96.34	KJ780751.1
Microdochium nivale	268	268	0.99	5e-68	96.34	MK651531.1
Microdochium poae	268	268	0.99	5e-68	96.34	LC500480.1
Microdochium poae	268	268	0.99	5e-68	96.34	NR_163757.1
Microdochium colombiense	268	268	0.99	5e-68	96.32	NR_155372.1
Monographella nivalis	268	268	0.99	5e-68	96.32	MN957065.1
Microdochium nivale	267	267	0.99	2e-67	96.34	KY460800.1
Microdochium bolleyi	265	265	0.99	6e-67	95.78	KY054752.1
Microdochium bolleyi	265	265	0.99	6e-67	95.76	MN759691.1
Microdochium nivale	261	261	0.87	8e-66	99.31	MN534787.1
Microdochium bolleyi	259	259	0.97	3e-65	95.68	KU901554.1
Microdochium bolleyi	259	259	0.97	3e-65	95.68	MN957201.1
Microdochium bolleyi	259	259	0.99	3e-65	95.18	LT990657.1
Microdochium bolleyi	259	259	0.99	3e-65	95.18	KU578329.1
Microdochium bolleyi	259	259	0.99	3e-65	95.18	MN534831.1
Microdochium bolleyi	259	259	0.99	3e-65	95.18	MN313298.1
Microdochium bolleyi	259	259	0.99	3e-65	95.18	MH473870.1
Microdochium bolleyi	259	259	0.99	3e-65	95.18	KU901552.1
Microdochium bolleyi	259	259	0.99	3e-65	95.18	KU901553.1
Microdochium bolleyi	259	259	0.99	3e-65	95.18	MT276118.1
Microdochium bolleyi	259	259	0.99	3e-65	95.18	MT276135.1
Microdochium bolleyi	259	259	0.99	3e-65	95.18	MT276137.1
Microdochium bolleyi	259	259	0.99	3e-65	95.18	MT276065.1
Microdochium bolleyi	259	259	0.99	3e-65	95.18	MT276069.1
Microdochium bolleyi	259	259	0.99	3e-65	95.18	MT276088.1
Microdochium bolleyi	259	259	0.99	3e-65	95.18	MT276095.1
Microdochium bolleyi	259	259	0.99	3e-65	95.18	MT276068.1
Microdochium bolleyi	259	259	0.99	3e-65	95.18	MK212854.1
Microdochium bolleyi	259	259	0.99	3e-65	95.18	MK212890.1
Microdochium bolleyi	259	259	0.99	3e-65	95.18	MK212892.1
Microdochium bolleyi	259	259	0.99	3e-65	95.18	MK212897.1
Microdochium bolleyi	259	259	0.99	3e-65	95.18	MK212899.1
Microdochium bolleyi	259	259	0.99	3e-65	95.18	MK212901.1
Microdochium bolleyi	259	259	0.99	3e-65	95.18	MK212902.1
Microdochium bolleyi	259	259	0.99	3e-65	95.18	MK212903.1
Microdochium bolleyi	259	259	0.99	3e-65	95.18	MK212904.1
Microdochium bolleyi	259	259	0.99	3e-65	95.18	MK212905.1
Microdochium bolleyi	259	259	0.99	3e-65	95.18	MK212911.1
Microdochium bolleyi	259	259	0.99	3e-65	95.18	KX067817.1
Microdochium bolleyi	259	259	0.99	3e-65	95.18	MN313335.1
Microdochium bolleyi	259	259	0.99	3e-65	95.18	KY460818.1
Microdochium bolleyi	259	259	0.99	3e-65	95.18	MF688675.1
Microdochium bolleyi	259	259	0.99	3e-65	95.18	MF688683.1
Microdochium bolleyi	259	259	0.99	3e-65	95.18	KX058046.1
Microdochium bolleyi	259	259	0.99	3e-65	95.18	MT151008.1
Microdochium bolleyi	259	259	0.99	3e-65	95.18	MT102452.1
Microdochium bolleyi	259	259	0.99	3e-65	95.18	MH858394.1
Microdochium bolleyi	259	259	0.99	3e-65	95.18	KP859010.1
Microdochium bolleyi	259	259	0.99	3e-65	95.18	MH860598.1
Microdochium bolleyi	259	259	0.99	3e-65	95.18	MT102453.1
Microdochium bolleyi	259	259	0.99	3e-65	95.18	KP859018.1
Microdochium bolleyi	259	259	0.99	3e-65	95.18	MH311614.1
Microdochium bolleyi	259	259	0.99	3e-65	95.18	MH319854.1
Microdochium bolleyi	259	259	0.99	3e-65	95.18	MN759672.1
Microdochium bolleyi	259	259	0.99	3e-65	95.18	MN759685.1
Microdochium bolleyi	259	259	0.99	3e-65	95.18	MN759686.1
Microdochium bolleyi	259	259	0.99	3e-65	95.18	MN759687.1
Microdochium bolleyi	259	259	0.99	3e-65	95.18	MN759688.1
Microdochium bolleyi	259	259	0.99	3e-65	95.18	MN759689.1
Microdochium bolleyi	259	259	0.99	3e-65	95.18	MN759690.1
Microdochium bolleyi	259	259	0.99	3e-65	95.18	MN759692.1
Microdochium bolleyi	259	259	0.99	3e-65	95.18	MN759693.1
Microdochium bolleyi	259	259	0.99	3e-65	95.18	KY365578.1
Microdochium bolleyi	259	259	0.99	3e-65	95.18	KY365585.1
Microdochium bolleyi	259	259	0.99	3e-65	95.18	KY365586.1
Microdochium bolleyi	259	259	0.99	3e-65	95.18	KY365584.1
Microdochium bolleyi	259	259	0.99	3e-65	95.18	KY305060.1
Microdochium bolleyi	259	259	0.99	3e-65	95.18	KT692593.1
Microdochium bolleyi	259	259	0.99	3e-65	95.18	MT446062.1
Microdochium bolleyi	259	259	0.99	3e-65	95.18	MT446063.1
Microdochium bolleyi	259	259	0.99	3e-65	95.18	MT446081.1
Microdochium bolleyi	259	259	0.99	3e-65	95.18	MT446094.1
Microdochium bolleyi	259	259	0.99	3e-65	95.18	MT446099.1
Microdochium bolleyi	259	259	0.99	3e-65	95.18	MT446101.1
Microdochium bolleyi	259	259	0.99	3e-65	95.18	MT446104.1
Microdochium bolleyi	259	259	0.99	3e-65	95.18	MT446085.1
Microdochium bolleyi	259	259	0.99	3e-65	95.18	MK102681.1
Microdochium bolleyi	259	259	0.99	3e-65	95.18	MK102679.1
Microdochium bolleyi	259	259	0.99	3e-65	95.18	MK102676.1
Microdochium bolleyi	259	259	0.99	3e-65	95.18	MK102678.1
Microdochium bolleyi	259	259	0.99	3e-65	95.18	MK102682.1
Microdochium bolleyi	259	259	0.99	3e-65	95.18	MK102677.1
Microdochium bolleyi	259	259	0.99	3e-65	95.18	MK102673.1
Microdochium bolleyi	259	259	0.99	3e-65	95.18	MK102674.1
Microdochium bolleyi	259	259	0.99	3e-65	95.18	MK102680.1
Microdochium bolleyi	259	259	0.99	3e-65	95.18	MK102675.1
Microdochium bolleyi	259	259	0.99	3e-65	95.18	MT446119.1
Microdochium bolleyi	259	259	0.99	3e-65	95.18	MT446123.1
Microdochium bolleyi	259	259	0.99	3e-65	95.18	MT446139.1
Microdochium bolleyi	259	259	0.99	3e-65	95.18	MT446207.1

## Sheet: Table S19_M.OTU5
Table S19: IDs of the sequences having the highest levels of identity and coverage with the 164 bp fragment of ITS2 of M.OTU5
Species	Max Score	Total Score	Query cover	E-value	Identity %	NCBI sequence ID
Microdochium nivale	303	303	1	1e-78	100.00	MH856120.1
Microdochium nivale	298	298	1	6e-77	99.39	FN394723.1
Microdochium nivale	298	298	1	6e-77	99.39	JX280590.1
Microdochium nivale	298	298	1	6e-77	99.39	JX280587.1
Microdochium nivale	298	298	1	6e-77	99.39	JX280589.1
Microdochium nivale	298	298	1	6e-77	99.39	MH392542.1
Monographella nivalis	298	298	1	6e-77	99.39	MN660864.1
Monographella nivalis	298	298	1	6e-77	99.39	FJ614641.1
Microdochium nivale	292	292	1	3e-75	98.78	JX280601.1
Monographella nivalis	292	292	1	3e-75	98.78	FJ614640.1
Microdochium nivale	287	287	0.96	1e-73	99.37	KT736219.1
Microdochium nivale	287	287	0.96	1e-73	99.37	KT736199.1
Microdochium nivale	287	287	0.96	1e-73	99.37	KT736216.1
Microdochium nivale	287	287	0.96	1e-73	99.37	KT736189.1
Microdochium nivale	287	287	0.96	1e-73	99.37	KT736215.1
Microdochium nivale	287	287	0.96	1e-73	99.37	KT736220.1
Microdochium nivale	287	287	0.96	1e-73	99.37	KT736217.1
Microdochium majus	287	287	1	1e-73	98.17	JX280595.1
Microdochium majus	287	287	1	1e-73	98.17	JX280583.1
Microdochium majus	287	287	1	1e-73	98.17	KP859001.1
Microdochium majus	287	287	1	1e-73	98.17	MN759665.1
Microdochium nivale	287	287	1	1e-73	98.17	AM502260.1
Microdochium nivale	287	287	1	1e-73	98.17	AM502266.1
Microdochium nivale	287	287	1	1e-73	98.17	AB272124.1
Microdochium nivale	287	287	1	1e-73	98.17	AB272125.1
Microdochium nivale	287	287	1	1e-73	98.17	AB586986.1
Microdochium nivale	287	287	1	1e-73	98.17	AB586987.1
Microdochium nivale	287	287	1	1e-73	98.17	MN428646.1
Microdochium nivale	287	287	1	1e-73	98.17	MT941442.1
Microdochium nivale	287	287	1	1e-73	98.17	MT941443.1
Microdochium nivale	287	287	1	1e-73	98.17	MT941444.1
Microdochium nivale	287	287	1	1e-73	98.17	MN313307.1
Microdochium nivale	287	287	1	1e-73	98.17	KY460750.1
Microdochium nivale	287	287	1	1e-73	98.17	KY460819.1
Microdochium nivale	287	287	1	1e-73	98.17	KY460810.1
Microdochium nivale	287	287	1	1e-73	98.17	KY460797.1
Microdochium nivale	287	287	1	1e-73	98.17	HM595722.1
Microdochium nivale	287	287	1	1e-73	98.17	JX280588.1
Microdochium nivale	287	287	1	1e-73	98.17	JX280603.1
Microdochium nivale	287	287	1	1e-73	98.17	MG891798.1
Microdochium nivale	287	287	1	1e-73	98.17	KP859008.1
Microdochium nivale	287	287	1	1e-73	98.17	MG891797.1
Microdochium nivale	287	287	1	1e-73	98.17	MG891796.1
Microdochium nivale	287	287	1	1e-73	98.17	EF187912.1
Microdochium nivale	287	287	1	1e-73	98.17	MK460368.1
Microdochium nivale	287	287	1	1e-73	98.17	MG891794.1
Microdochium nivale	287	287	1	1e-73	98.17	MG891793.1
Microdochium nivale	287	287	1	1e-73	98.17	MG098306.1
Microdochium nivale	287	287	1	1e-73	98.17	KT692594.1
Microdochium majus	287	287	1	1e-73	98.17	MH855031.1
Microdochium majus	287	287	1	1e-73	98.17	MH858044.1
Microdochium nivale	287	287	1	1e-73	98.17	MH857684.1
Microdochium nivale	287	287	1	1e-73	98.17	MH856626.1
Microdochium nivale	281	281	0.96	6e-72	98.73	KT736218.1
Microdochium nivale	281	281	1	6e-72	97.56	JX280607.1
Microdochium nivale	279	279	0.97	2e-71	98.12	KT736214.1
Microdochium nivale	278	278	0.97	8e-71	98.12	KT736190.1
Monographella nivalis	276	276	0.92	3e-70	99.34	MN660593.1
Microdochium majus	276	276	0.96	3e-70	98.10	KT736198.1
Microdochium majus	276	276	0.96	3e-70	98.10	KT736194.1
Microdochium majus	276	276	0.96	3e-70	98.10	KT736191.1
Microdochium majus	276	276	0.96	3e-70	98.10	KT736181.1
Microdochium majus	276	276	0.96	3e-70	98.10	KT736197.1
Microdochium majus	276	276	0.96	3e-70	98.10	KT736205.1
Microdochium majus	276	276	0.96	3e-70	98.10	KT736204.1
Microdochium majus	276	276	0.96	3e-70	98.10	KT736206.1
Microdochium majus	276	276	0.96	3e-70	98.10	KT736203.1
Microdochium majus	276	276	0.96	3e-70	98.10	KT736193.1
Microdochium majus	276	276	0.96	3e-70	98.10	KT736192.1
Microdochium nivale	276	276	0.96	3e-70	98.10	KT736213.1
Microdochium nivale	276	276	0.96	3e-70	98.10	KT736207.1
Microdochium nivale	276	276	0.96	3e-70	98.10	KT736210.1
Microdochium nivale	276	276	0.96	3e-70	98.10	KT736195.1
Microdochium nivale	276	276	0.96	3e-70	98.10	KT736196.1
Microdochium nivale	276	276	0.96	3e-70	98.10	KT736208.1
Microdochium nivale	276	276	0.96	3e-70	98.10	KT736211.1
Microdochium nivale	276	276	0.96	3e-70	98.10	KT736209.1
Microdochium nivale	276	276	0.96	3e-70	98.10	KT736212.1
Microdochium nivale	276	276	0.96	3e-70	98.10	KT736183.1
Microdochium nivale	276	276	0.96	3e-70	98.10	KT736188.1
Microdochium nivale	276	276	0.96	3e-70	98.10	KT736187.1
Microdochium nivale	276	276	1	3e-70	96.97	AF067642.1
Microdochium nivale	276	276	1	3e-70	96.97	KY460789.1
Microdochium nivale	276	276	1	3e-70	96.97	MN759666.1
Microdochium nivale	272	272	1	4e-69	96.41	KY460788.1
Microdochium majus	270	270	0.96	1e-68	97.48	KT736184.1
Microdochium nivale	270	270	0.96	1e-68	97.48	KT736185.1
Microdochium nivale	270	270	0.96	1e-68	97.48	KT736182.1
Microdochium nivale	270	270	0.96	1e-68	97.48	KT736186.1
Microdochium nivale	270	270	0.96	1e-68	97.47	KT736201.1
Microdochium nivale	270	270	0.96	1e-68	97.47	KT736200.1
Microdochium nivale	270	270	0.96	1e-68	97.47	KT736202.1
Microdochium nivale	268	268	0.9	5e-68	99.32	MN534787.1
Microdochium nivale	267	267	1	2e-67	96.34	HQ533821.1
Microdochium bolleyi	255	255	1	4e-64	94.61	KY054752.1
Microdochium bolleyi	255	255	1	4e-64	94.58	MN759691.1
Microdochium nivale	254	254	1	1e-63	94.55	KJ780751.1
Microdochium nivale	254	254	1	1e-63	94.55	MK651531.1
Microdochium poae	254	254	1	1e-63	94.55	LC500480.1
Microdochium poae	254	254	1	1e-63	94.55	NR_163757.1
Microdochium colombiense	254	254	1	1e-63	94.51	NR_155372.1
Monographella nivalis	254	254	1	1e-63	94.51	MN957065.1
Microdochium nivale	252	252	1	5e-63	94.55	KY460800.1
Microdochium bolleyi	250	250	0.98	2e-62	94.48	KU901554.1
Microdochium bolleyi	250	250	0.98	2e-62	94.48	MN957201.1
Microdochium bolleyi	250	250	1	2e-62	94.01	LT990657.1
Microdochium bolleyi	250	250	1	2e-62	94.01	KU578329.1
Microdochium bolleyi	250	250	1	2e-62	94.01	MN534831.1
Microdochium bolleyi	250	250	1	2e-62	94.01	MN313298.1
Microdochium bolleyi	250	250	1	2e-62	94.01	MH473870.1
Microdochium bolleyi	250	250	1	2e-62	94.01	KU901552.1
Microdochium bolleyi	250	250	1	2e-62	94.01	KU901553.1
Microdochium bolleyi	250	250	1	2e-62	94.01	MT276118.1
Microdochium bolleyi	250	250	1	2e-62	94.01	MT276135.1
Microdochium bolleyi	250	250	1	2e-62	94.01	MT276137.1
Microdochium bolleyi	250	250	1	2e-62	94.01	MT276065.1
Microdochium bolleyi	250	250	1	2e-62	94.01	MT276069.1
Microdochium bolleyi	250	250	1	2e-62	94.01	MT276088.1
Microdochium bolleyi	250	250	1	2e-62	94.01	MT276095.1
Microdochium bolleyi	250	250	1	2e-62	94.01	MT276068.1
Microdochium bolleyi	250	250	1	2e-62	94.01	MK212854.1
Microdochium bolleyi	250	250	1	2e-62	94.01	MK212890.1
Microdochium bolleyi	250	250	1	2e-62	94.01	MK212892.1
Microdochium bolleyi	250	250	1	2e-62	94.01	MK212897.1
Microdochium bolleyi	250	250	1	2e-62	94.01	MK212899.1
Microdochium bolleyi	250	250	1	2e-62	94.01	MK212901.1
Microdochium bolleyi	250	250	1	2e-62	94.01	MK212902.1
Microdochium bolleyi	250	250	1	2e-62	94.01	MK212903.1
Microdochium bolleyi	250	250	1	2e-62	94.01	MK212904.1
Microdochium bolleyi	250	250	1	2e-62	94.01	MK212905.1
Microdochium bolleyi	250	250	1	2e-62	94.01	MK212911.1
Microdochium bolleyi	250	250	1	2e-62	94.01	KX067817.1
Microdochium bolleyi	250	250	1	2e-62	94.01	MN313335.1
Microdochium bolleyi	250	250	1	2e-62	94.01	KY460818.1
Microdochium bolleyi	250	250	1	2e-62	94.01	MF688675.1
Microdochium bolleyi	250	250	1	2e-62	94.01	MF688683.1
Microdochium bolleyi	250	250	1	2e-62	94.01	KX058046.1
Microdochium bolleyi	250	250	1	2e-62	94.01	MT151008.1
Microdochium bolleyi	250	250	1	2e-62	94.01	MT102452.1
Microdochium bolleyi	250	250	1	2e-62	94.01	MH858394.1
Microdochium bolleyi	250	250	1	2e-62	94.01	KP859010.1
Microdochium bolleyi	250	250	1	2e-62	94.01	MH860598.1
Microdochium bolleyi	250	250	1	2e-62	94.01	MT102453.1
Microdochium bolleyi	250	250	1	2e-62	94.01	KP859018.1
Microdochium bolleyi	250	250	1	2e-62	94.01	MH311614.1
Microdochium bolleyi	250	250	1	2e-62	94.01	MH319854.1
Microdochium bolleyi	250	250	1	2e-62	94.01	MN759672.1
Microdochium bolleyi	250	250	1	2e-62	94.01	MN759685.1
Microdochium bolleyi	250	250	1	2e-62	94.01	MN759686.1
Microdochium bolleyi	250	250	1	2e-62	94.01	MN759687.1
Microdochium bolleyi	250	250	1	2e-62	94.01	MN759688.1
Microdochium bolleyi	250	250	1	2e-62	94.01	MN759689.1
Microdochium bolleyi	250	250	1	2e-62	94.01	MN759690.1
Microdochium bolleyi	250	250	1	2e-62	94.01	MN759692.1
Microdochium bolleyi	250	250	1	2e-62	94.01	MN759693.1
Microdochium bolleyi	250	250	1	2e-62	94.01	KY365578.1
Microdochium bolleyi	250	250	1	2e-62	94.01	KY365585.1
Microdochium bolleyi	250	250	1	2e-62	94.01	KY365586.1
Microdochium bolleyi	250	250	1	2e-62	94.01	KY365584.1
Microdochium bolleyi	250	250	1	2e-62	94.01	KY305060.1
Microdochium bolleyi	250	250	1	2e-62	94.01	KT692593.1
Microdochium bolleyi	250	250	1	2e-62	94.01	MT446062.1
Microdochium bolleyi	250	250	1	2e-62	94.01	MT446063.1
Microdochium bolleyi	250	250	1	2e-62	94.01	MT446081.1
Microdochium bolleyi	250	250	1	2e-62	94.01	MT446094.1
Microdochium bolleyi	250	250	1	2e-62	94.01	MT446099.1
Microdochium bolleyi	250	250	1	2e-62	94.01	MT446101.1
Microdochium bolleyi	250	250	1	2e-62	94.01	MT446104.1
Microdochium bolleyi	250	250	1	2e-62	94.01	MT446085.1
Microdochium bolleyi	250	250	1	2e-62	94.01	MK102681.1
Microdochium bolleyi	250	250	1	2e-62	94.01	MK102679.1
Microdochium bolleyi	250	250	1	2e-62	94.01	MK102676.1
Microdochium bolleyi	250	250	1	2e-62	94.01	MK102678.1
Microdochium bolleyi	250	250	1	2e-62	94.01	MK102682.1
Microdochium bolleyi	250	250	1	2e-62	94.01	MK102677.1
Microdochium bolleyi	250	250	1	2e-62	94.01	MK102673.1
Microdochium bolleyi	250	250	1	2e-62	94.01	MK102674.1
Microdochium bolleyi	250	250	1	2e-62	94.01	MK102680.1
Microdochium bolleyi	250	250	1	2e-62	94.01	MK102675.1
Microdochium bolleyi	250	250	1	2e-62	94.01	MT446119.1
Microdochium bolleyi	250	250	1	2e-62	94.01	MT446123.1
Microdochium bolleyi	250	250	1	2e-62	94.01	MT446139.1
Microdochium bolleyi	250	250	1	2e-62	94.01	MT446207.1
