# Supplementary material for: Rye Snow Mold-Associated Microdochium nivale Strains Inhabiting a Common Area: Variability in Genetics, Morphotype, Extracellular Enzymatic Activities, and Virulence
Source: J Fungi (Basel). 2020 Dec 3;6(4):335. doi: 10.3390/jof6040335 (PMC7761817; doi:10.3390/jof6040335)
Supplement: Supplementary file 1 [file jof-06-00335-s001.zip › Table S20-21.xls]

## Sheet: Table S20_Correlation analysis
Table 20. Correlation analysis of enzymatic activities and growth rate of the isolated Microdochium nivale strains and morphological characteristics of plants infected by the isolated strains
	Strength of Relationship: red values – strong correlation, blue values – moderate correlation; others - weak or no correlation
	Critical values for Pearson’s correlation coefficient r=0.433 (Coefficient of determination R2 = 0,1875)
		Morphological characteristics of the infected plants										Growth	Enzymatic activities
		Root length (cm)	Shoot length (cm)	Number of leaves per plant	Number of roots per plant	Weight of shoots of 10 plants (g)	Weight of roots of 10 plants (g)	Weight of 10 plants (g)	Percentage of plants with brownish roots, %	Percentage of plants with stem necrosis, %	Percentage of plants with leaf necrosis, %	Growth rate, mm per day	Amylase 20 days	Amylase 30 days	Protease 20 days	Protease 30 days	Cellulase 20 days	Cellulase 30 days	Arabinofuranosidase 20 days	Arabinofuranosidase 30 days	Invertase 20 days	Invertase 30 days	Xylanase 20 days	Xylanase 30 days	Pectate lyase 20 days	Pectate lyase 30 days	Lignin peroxidase 20 days	Lignin peroxidase 30 days
Morphological characteristics of infected plants	Root length (cm)	1
	Shoot length (cm)	0.917338	1
	Number of leaves per plant	0.368877	0.603861	1
	Number of roots per plant	0.334187	0.562161	0.731443	1
	Weight of shoots of 10 plants (g)	0.864166	0.954297	0.56204	0.609198	1
	Weight of roots of 10 plants (g)	0.899502	0.931047	0.465069	0.533132	0.947554	1
	Weight of 10 plants (g)	0.882091	0.957963	0.542631	0.595681	0.996568	0.970756	1
	Percentage of plants with brownish roots, %	-0.88419	-0.846001	-0.285371	-0.341412	-0.861595	-0.914181	-0.883962	1
	Percentage of plants with stem necrosis, %	-0.809826	-0.907169	-0.460933	-0.435703	-0.909611	-0.918634	-0.921182	0.866266	1
	Percentage of plants with leaf necrosis, %	-0.755861	-0.915563	-0.584127	-0.570562	-0.946217	-0.906251	-0.945472	0.79939	0.948121	1
Growth	Growth rate, mm per day	-0.433962	-0.417164	-0.396991	-0.326384	-0.432324	-0.459046	-0.443633	0.361009	0.41736	0.423124	1
Enzymatic activities	Amylase 20 days	-0.186599	-0.0899528	0.0239165	-0.109779	-0.153588	-0.179283	-0.161802	0.225834	-0.0352786	0.0418584	-0.0517631	1
	Amylase 30 days	-0.311296	-0.27837	-0.131213	-0.166041	-0.263723	-0.393822	-0.300095	0.1301	0.207323	0.284774	0.30071	0.391114	1
	Protease 20 days	0.0718064	0.0181469	-0.0874121	-0.142005	0.0330282	-0.0544032	0.010719	-0.00846115	0.025423	0.00280597	0.379965	0.187701	0.0953214	1
	Protease 30 days	0.187408	0.206856	-0.00869031	-0.163877	0.270381	0.207925	0.25695	-0.412918	-0.302451	-0.248551	0.134101	-0.172532	0.263232	0.130731	1
	Cellulase 20 days	-0.0417091	-0.145101	-0.0827608	-0.325942	-0.212434	-0.0385481	-0.169555	0.0489213	0.118731	0.141718	-0.091497	0.170134	-0.327295	0.0398293	-0.100355	1
	Cellulase 30 days	-0.1933	-0.323234	-0.227049	-0.563554	-0.379326	-0.278461	-0.357053	0.209128	0.307424	0.333473	0.118731	0.174299	-0.134933	0.261958	0.151678	0.84328	1
	Arabinofuranosidase 20 days	0.0499981	-0.0396038	-0.107349	-0.266436	-0.0794005	-0.13018	-0.0933582	0.180568	0.0306808	0.0718633	0.0897011	0.294312	-0.0217922	0.288357	-0.134255	0.0761072	0.0787992	1
	Arabinofuranosidase 30 days	0.0281061	0.162227	0.395626	0.388246	0.179987	0.0412401	0.145879	0.194983	0.0520094	-0.122477	0.04689	0.155553	-0.261054	0.373629	-0.216629	0.0147656	0.00577925	0.0214104	1
	Invertase 20 days	0.0432661	0.0655298	0.234185	-0.075248	0.00198414	0.0884758	0.0244054	-0.0763386	-0.0477478	-0.108965	-0.449782	0.0757647	-0.0732738	-0.416285	-0.046749	0.419696	0.332072	-0.210616	-0.273059	1
	Invertase 30 days	0.0433953	0.166379	0.0433484	0.0691655	0.220191	0.121278	0.196808	-0.193336	-0.248245	-0.236368	0.259518	0.0488503	0.337836	-0.0753672	0.625074	-0.244736	-0.0715343	-0.216858	0.0594829	-0.166161	1
	Xylanase 20 days	-0.120988	-0.073057	-0.0465504	0.0925388	-0.184301	-0.129546	-0.17199	0.174362	0.182184	0.148732	0.236566	-0.280532	-0.0385509	-0.473081	-0.359968	-0.117422	-0.240435	-0.264215	-0.127121	0.0556504	0.0219694	1
	Xylanase 30 days	-0.404526	-0.195307	0.00868146	0.30063	-0.170274	-0.223984	-0.185913	0.313267	0.1967	0.0873856	0.07578	0.115894	0.170298	-0.326444	-0.407568	-0.325718	-0.363665	-0.356264	-0.0653172	0.137906	-0.0558584	0.398767	1
	Pectate lyase 20 days	-0.284338	-0.277274	-0.0995917	0.139253	-0.166464	-0.194254	-0.175351	0.184211	0.2484	0.267459	0.116448	0.119695	0.225002	0.186405	-0.158519	-0.150782	-0.0665918	-0.181621	-0.00684871	-0.327407	-0.259182	-0.19468	0.431866	1
	Pectate lyase 30 days	-0.0829591	0.0650727	0.10122	0.0419422	0.100244	0.170527	0.119465	0.0153515	-0.307583	-0.313338	-0.248895	0.281972	-0.290521	-0.247858	-0.269529	0.244559	0.0132983	0.00731382	-0.10222	0.367578	-0.0611563	-0.0613843	0.297717	-0.122722	1
	Lignin peroxidase 20 days	0.183662	-0.0108151	-0.190167	-0.365937	-0.0969735	-0.0281348	-0.0801288	-0.0489952	0.0818558	0.164297	-0.122963	-0.231691	-0.0995347	-0.23877	-0.292702	0.0914014	-0.0390847	0.144022	-0.257044	0.0616638	-0.472146	0.269663	-0.173718	-0.0998745	-0.178945	1
	Lignin peroxidase 30 days	0.416906	0.344091	-0.0196652	-0.158629	0.324312	0.339947	0.331654	-0.450039	-0.354964	-0.303288	-0.217003	-0.457559	-0.177429	-0.257884	0.202501	-0.149389	-0.118669	-0.271249	-0.316978	0.0944081	-0.0812721	0.200986	-0.0861283	-0.142073	-0.0561356	0.574602	1

## Sheet: Table S21. Cluster analysis
Table S21. Agglomerative hierarchical clustering of the isolated Microdochium nivale strains according to the degree of symptom manifestation on the infected rye plants after the infection
Mean values of plant parameters are presented. Control – non infected plants. Clusters were delineated at an arbitrary level of r = 0.65.
Cluster No		Morphological characteristics of the infected plants
	Strain No	Root length (cm)	Shoot length (cm)	Number of leaves per plant	Number of roots per plant	Weight of shoots of 10 plants (g)	Weight of roots of 10 plants (g)	Weight of 10 plants (g)	Percentage of plants with brownish roots, %	Percentage of plants with stem necrosis, %	Percentage of plants with leaf necrosis, %
1	14	4.35	23.31	3.38	7.88	2.15	0.54	2.69	100	100	93.75
	1	4.23	22.98	3.43	6.79	1.21	0.43	1.64	100	100	92.8571
	12	4.89	21.01	2.79	6.36	1.17	0.49	1.66	100	100	100
	13	5.52	22.39	2.6	7.27	1.47	0.61	2.08	100	100	93.3333
	8	4.55	20.58	2.67	6.93	1.31	0.41	1.72	100	100	100
	11	4.72	19.39	3	5.73	0.81	0.33	1.14	100	100	100
	21	3.01	16.1	2.43	5.21	0.83	0.27	1.1	92.8571	100	100
	9	3.89	19.99	3.6	8	1.37	0.41	1.78	100	86.6667	93.3333
	6	6.14	25.14	3.56	6.81	1.63	0.51	2.14	100	100	81.25
	5	4.95	24.01	3.56	7.38	1.46	0.45	1.91	100	100	81.25
	15	2.55	20.85	3.4	8.07	2.57	0.57	3.14	100	100	46.6667
Mean Values		4.43636	21.4318	3.12909	6.94818	1.45273	0.456364	1.90909	99.3506	98.7879	89.3128
2	3	10.34	34.56	3.5	8.19	4.49	1.43	5.92	31.25	37.5	31.25
	10	8.68	31.57	3.36	6.64	3.58	1.03	4.61	78.5714	28.5714	28.5714
	7	8.17	34.18	3.93	8.8	4.67	1.27	5.94	81.25	56.25	18.75
	16	3.98	29.53	3.75	8.08	3.43	0.98	4.41	100	8.33333	0
Mean Values		7.7925	32.46	3.635	7.9275	4.0425	1.1775	5.22	72.7679	32.6637	19.6429
3	19	9.75	34.77	3.63	8	4.98	1.75	6.73	25	12.5	12.5
	20	7.77	33.73	3.36	7.86	4.19	1.21	5.4	14.2857	7.14286	7.14286
Mean Values		8.76	34.25	3.495	7.93	4.585	1.48	6.065	19.6429	9.82143	9.82143
4	17	10.87	38	3.6	7.4	4.65	1.63	6.28	13.3333	0	0
	4	10.55	34.22	3.2	7.2	4.77	1.74	6.51	13.3333	0	0
	2	9.33	34.03	3.53	8.33	4.58	2.05	6.63	7.69231	0	0
	18	10.88	36.35	3.46	7.54	5.81	1.68	7.49	0	0	0
	control	12.3	37.73	4.17	6.75	5.8	2.31	8.11	0	0	0
Mean Values		10.786	36.066	3.592	7.444	5.122	1.882	7.004	6.87179	0	0
